# Supplementary material for: Genome-Wide Mapping of Decay Factor–mRNA Interactions in Yeast Identifies Nutrient-Responsive Transcripts as Targets of the Deadenylase Ccr4
Source: G3 (Bethesda). 2017 Nov 20;8(1):315–30. doi: 10.1534/g3.117.300415 (PMC5765359; doi:10.1534/g3.117.300415)
Supplement: Supplementary file 1 [file 315FileS1.xlsx]

## Sheet: reads per gene
gene	UTIP.rep1	UTIP.rep2	UTIP.rep3	M5IP.rep1	M5IP.rep2	M5IP.rep3	C4IP.rep1	C4IP.rep2	C4IP.rep3	D1IP.rep1	D1IP.rep2	D1IP.rep3	UTIN.rep1	UTIN.rep2
ARS1011	0	0	0	0	1	1	0	0	2	0	0	0	0	0
ARS1012	0	0	0	0	0	1	0	2	0	0	0	0	0	0
ARS1014	0	0	0	0	0	0	0	0	0	0	0	0	0	0
ARS1018	0	0	0	0	0	0	0	0	0	1	0	0	1	0
ARS1020	0	0	0	0	0	0	1	0	0	1	0	1	0	0
ARS1022	0	0	0	0	0	0	1	2	0	0	0	0	0	0
ARS1024	0	0	0	0	0	0	0	0	0	0	1	0	0	0
ARS104	12	14	33	109	14	9	21	14	56	19	11	15	12	16
ARS106	0	2	0	0	0	0	0	0	0	0	0	0	0	0
ARS107	0	0	8	3	0	5	6	8	1	10	1	2	2	0
ARS109	0	0	0	1	0	0	0	0	0	2	0	0	0	0
ARS110	0	0	0	0	0	3	1	0	0	0	0	1	3	0
ARS1103	1	0	0	3	2	5	0	0	0	2	2	3	1	0
ARS1106	0	1	2	0	0	0	1	1	1	0	1	0	0	0
ARS1109	0	0	1	0	0	0	0	0	0	0	1	1	0	0
ARS1112	0	1	0	5	1	5	0	0	0	1	0	0	1	0
ARS1113	1	0	1	0	1	1	0	9	0	1	0	0	0	77
ARS1114	0	0	0	0	0	1	0	0	1	0	1	0	0	0
ARS1116	1	2	0	0	0	2	0	0	1	0	1	1	0	3
ARS1118	2	2	0	0	0	1	0	0	1	0	0	0	0	0
ARS1120	1	0	0	0	4	1	13	13	1	1	4	2	0	2
ARS1123	0	1	1	0	0	0	1	0	1	0	0	0	1	0
ARS1125	6	0	6	2	2	3	27	1	0	35	3	5	2	9
ARS1126	0	0	0	0	1	3	1	1	2	2	1	1	2	4
ARS1206	0	0	0	0	0	0	4	0	0	0	0	0	0	0
ARS1209	0	0	0	0	0	1	0	0	3	0	0	3	0	0
ARS1211	0	0	0	1	1	0	1	1	0	0	0	1	0	1
ARS1212	0	4	3	3	0	2	0	4	2	2	0	0	3	2
ARS1213	0	0	0	3	0	0	5	5	1	1	0	1	0	3
ARS1215	0	1	1	0	0	0	0	1	2	0	0	0	0	1
ARS1216	1	0	0	0	0	0	1	0	1	1	1	1	0	0
ARS1217	2	1	0	0	0	0	4	3	1	2	0	0	1	3
ARS1218	0	0	0	1	0	0	0	0	0	1	0	0	0	0
ARS1220	0	0	0	1	3	1	0	0	1	1	2	0	0	1
ARS1223	0	0	0	0	0	0	0	0	1	0	1	1	5	0
ARS1226	1	0	0	2	0	2	0	0	0	1	0	0	0	0
ARS1232	0	0	0	0	0	0	0	0	0	0	0	0	0	0
ARS1233	1	4	1	0	0	1	1	1	1	1	1	0	0	11
ARS1234	0	1	1	0	0	0	0	0	0	0	1	0	1	0
ARS1238	0	0	2	8	0	0	2	3	0	0	0	3	0	0
ARS1303	0	0	0	0	0	0	1	6	0	0	0	0	0	0
ARS1305	1	2	2	2	3	1	1	2	1	3	3	0	1	1
ARS1307	1	1	0	0	1	0	2	0	4	1	0	0	6	1
ARS1308	0	0	0	0	0	0	1	0	0	0	0	0	0	0
ARS1309	5	1	6	11	2	3	7	4	2	4	2	2	0	1
ARS1310	0	1	1	0	0	0	0	0	0	0	0	0	0	0
ARS1312	0	0	0	1	0	1	0	2	0	0	0	0	0	0
ARS1316	2	3	0	11	6	3	18	12	9	13	14	3	7	7
ARS1320	0	0	1	0	1	1	0	0	1	0	0	1	0	0
ARS1323	0	0	0	0	0	0	1	0	2	0	0	0	0	0
ARS1324	11	4	11	137	30	43	27	5	21	17	10	24	40	134
ARS1325	0	1	0	3	2	0	0	0	0	1	2	0	1	0
ARS1327	0	0	0	0	0	0	1	2	0	0	0	1	0	0
ARS1328	0	1	0	1	0	3	5	1	0	1	0	1	1	1
ARS1329	1	0	0	0	0	1	0	0	1	0	0	0	0	0
ARS1330	1	0	0	1	0	1	0	0	0	0	0	0	0	0
ARS1332	0	0	0	1	0	0	2	0	0	0	0	1	0	0
ARS1405	0	1	1	0	0	0	1	0	0	0	1	1	0	0
ARS1406	0	2	0	3	2	3	0	0	0	2	2	0	1	0
ARS1407	1	0	0	0	1	0	0	0	1	0	0	0	0	0
ARS1411	0	0	0	1	0	0	0	0	0	0	0	1	0	0
ARS1412	1	0	2	0	1	3	10	2	2	2	1	1	0	2
ARS1414	0	0	0	4	2	3	1	1	5	8	0	1	3	3
ARS1415	1	0	2	2	1	1	1	0	0	0	0	0	1	0
ARS1417	0	0	0	0	0	0	1	0	0	0	1	0	0	0
ARS1419	9	0	1	3	2	5	9	2	2	2	0	3	10	10
ARS1420	0	0	0	0	0	1	0	0	0	0	1	0	0	1
ARS1421	2	3	0	20	14	8	7	12	5	10	10	4	5	1
ARS1422	0	0	0	1	0	0	0	0	0	1	0	0	0	1
ARS1424	0	0	0	0	0	0	0	0	1	0	1	0	0	1
ARS1426	0	1	0	1	0	1	1	2	1	0	0	1	0	1
ARS1427	0	0	0	0	0	1	0	0	3	1	0	0	0	1
ARS1507	0	0	0	0	0	0	0	0	0	0	0	0	0	0
ARS1508	1	0	42	0	2	1	2	0	1	1	2	1	1	1
ARS1509	0	1	0	0	0	1	0	0	2	0	0	1	0	0
ARS1510	0	0	1	0	0	0	1	0	0	0	1	0	0	0
ARS1511	0	1	0	0	0	0	0	0	0	0	0	0	0	0
ARS1513	0	0	0	1	0	0	1	0	0	0	0	0	1	0
ARS1516	0	0	0	1	0	2	1	0	0	1	0	1	0	0
ARS1519	3	0	2	3	0	0	5	2	2	0	2	6	4	1
ARS1521	1	0	0	0	0	0	0	0	1	1	1	1	1	2
ARS1523	0	0	0	2	0	1	3	1	1	0	0	0	3	2
ARS1524	1	0	1	0	0	0	1	0	2	0	1	0	0	0
ARS1526	0	0	0	5	1	3	0	0	0	1	0	1	0	0
ARS1528	1	0	0	0	0	0	0	1	1	0	1	0	0	0
ARS1529	0	2	0	3	1	1	4	1	0	2	0	1	2	15
ARS1531	1	1	0	0	0	0	0	0	0	0	0	0	0	0
ARS1604	1	5	4	18	8	22	78	44	22	22	51	46	22	15
ARS1605	2	2	3	5	2	7	3	2	9	4	2	0	4	7
ARS1607	0	0	2	0	0	0	0	0	0	0	0	0	0	0
ARS1614	0	0	2	0	0	0	1	1	0	1	0	1	1	1
ARS1618	0	0	0	0	0	0	4	0	0	0	0	0	0	0
ARS1619	0	0	0	0	0	0	1	1	1	0	0	0	0	0
ARS1622	1	0	0	0	0	0	0	0	0	0	0	0	0	0
ARS1623	6	0	0	0	1	1	9	0	1	1	0	1	0	1
ARS1624	0	1	0	0	0	0	1	1	0	0	2	0	0	0
ARS1625	0	2	0	1	2	1	0	1	1	0	0	0	0	0
ARS1626	2	0	23	76	2	3	0	2	3	5	1	2	0	1
ARS1627	0	0	0	0	3	2	16	3	1	1	2	0	0	1
ARS1628	1	0	0	0	1	0	0	2	1	0	0	1	0	0
ARS1630	0	0	0	0	0	0	0	0	1	0	0	0	0	0
ARS1631	2	0	0	1	2	0	7	3	0	2	0	3	1	0
ARS1633	0	0	0	0	1	0	0	2	0	1	0	0	0	0
ARS1634	0	0	0	0	1	0	2	0	0	0	0	0	0	0
ARS1635	1	0	0	4	0	2	0	1	0	0	0	0	0	1
ARS202	0	0	1	1	0	2	0	0	0	0	0	0	0	1
ARS207	0	0	0	1	1	2	0	1	0	1	0	0	0	1
ARS208	0	0	0	0	1	0	0	0	0	1	0	0	1	0
ARS211	4	0	0	7	0	2	4	5	7	2	8	4	7	4
ARS214	0	1	0	0	0	0	0	0	0	4	0	1	0	0
ARS215	0	4	0	0	0	0	0	0	0	1	0	1	0	2
ARS216	0	0	2	0	0	0	0	0	0	0	0	1	0	0
ARS220	0	0	0	1	0	0	2	0	1	0	0	0	0	0
ARS222	0	0	0	1	1	2	3	7	2	3	1	6	0	1
ARS224	3	7	0	12	9	11	15	20	10	9	30	18	13	5
ARS225	0	0	0	0	0	0	1	0	0	0	0	0	0	0
ARS228	0	0	0	0	0	1	0	1	0	0	0	0	0	0
ARS230	1	1	0	0	1	1	0	0	1	0	0	0	1	0
ARS231	0	0	0	0	0	0	0	1	0	0	0	0	0	0
ARS301	0	0	0	0	0	1	0	1	0	0	0	1	0	0
ARS302	0	0	0	0	0	0	0	1	0	0	0	0	0	1
ARS306	0	0	0	0	0	0	0	0	0	0	0	0	0	0
ARS313	0	0	0	3	4	2	2	1	2	1	1	0	6	1
ARS314	3	0	0	1	0	0	0	5	1	1	0	0	0	0
ARS315	0	1	1	0	0	3	1	0	0	1	0	1	0	0
ARS316	1	5	0	2	4	6	6	6	9	3	4	0	3	4
ARS403	0	0	0	0	0	0	1	0	0	0	1	1	0	1
ARS405	0	0	1	0	1	0	1	1	2	0	1	0	0	0
ARS406	2	0	1	6	0	1	8	2	7	3	4	3	6	80
ARS409	1	0	0	0	0	0	0	0	0	0	0	1	0	0
ARS410	2	0	0	0	4	0	0	1	0	2	1	0	1	4
ARS413	8	5	8	28	5	9	13	4	26	13	6	5	13	10
ARS414	0	0	0	1	0	1	0	1	0	0	0	1	0	0
ARS417	0	0	0	2	1	0	0	1	0	3	0	1	0	0
ARS418	0	0	0	0	0	0	3	2	0	0	0	0	0	0
ARS419	4	0	2	2	1	3	4	2	3	1	2	4	2	2
ARS421	0	0	1	6	3	4	4	0	1	0	0	1	2	1
ARS422	0	0	0	0	0	0	0	1	0	0	0	1	0	0
ARS423	0	0	0	0	0	0	0	1	2	0	2	0	4	4
ARS425	0	0	0	1	2	0	0	0	1	0	0	1	0	0
ARS428	0	0	0	2	0	2	0	0	1	1	0	0	0	1
ARS429	0	0	4	9	1	1	2	2	4	4	5	3	7	6
ARS430	0	0	0	0	0	0	2	0	0	0	1	0	3	0
ARS431	0	1	0	0	0	1	0	0	0	1	0	1	0	0
ARS432	0	0	0	0	0	1	0	0	0	1	0	1	1	1
ARS433	0	0	1	0	0	0	1	0	0	0	1	0	0	0
ARS434	1	0	0	0	0	2	0	0	0	0	0	0	0	0
ARS435	0	0	0	1	0	1	0	1	0	0	0	0	0	0
ARS440	0	0	0	0	0	1	1	1	0	2	2	0	0	1
ARS446	0	0	0	1	0	0	0	0	0	0	1	1	0	0
ARS450	0	0	0	1	1	1	0	0	0	0	0	0	0	0
ARS451	1	0	4	4	0	5	0	0	2	2	2	2	2	1
ARS452	1	0	0	0	0	1	0	0	0	2	1	2	0	0
ARS453	0	0	0	0	0	2	0	0	4	0	0	0	0	0
ARS507	6	11	6	6	4	8	7	4	9	5	6	4	6	2
ARS508	1	1	5	1	0	2	3	1	0	0	0	4	0	0
ARS510	1	0	0	3	2	0	0	1	0	2	3	3	5	4
ARS511	0	0	0	0	0	0	2	0	3	2	1	0	1	0
ARS512	0	0	0	1	1	1	0	0	0	0	0	0	0	0
ARS514	0	0	0	0	0	0	0	0	0	0	1	0	0	0
ARS515	0	1	0	3	0	1	0	0	1	0	0	1	0	0
ARS516	0	0	0	0	0	0	0	1	2	0	0	0	0	0
ARS517	1	0	0	3	0	1	3	6	1	1	0	2	0	0
ARS518	0	0	0	0	0	0	1	0	0	1	0	0	0	0
ARS521	1	1	0	1	3	2	2	4	3	2	3	2	1	0
ARS522	1	0	0	0	0	0	0	0	0	0	1	0	0	0
ARS702	0	0	0	0	0	0	0	0	1	0	0	0	0	0
ARS704	0	1	0	0	0	0	0	2	1	0	0	1	1	2
ARS706	6	2	0	14	2	1	13	5	5	9	7	3	7	7
ARS707	0	0	0	0	0	3	0	0	0	0	0	0	0	0
ARS710	2	5	0	6	1	4	0	6	3	2	3	2	0	17
ARS714	0	0	0	0	1	0	2	0	0	0	0	2	0	0
ARS716	0	0	0	0	1	0	0	0	0	0	1	0	0	1
ARS717	9	2	5	14	6	15	48	19	28	8	12	8	20	14
ARS718	0	0	0	0	0	1	1	1	0	0	1	0	1	0
ARS719	0	0	0	0	0	1	0	0	1	0	0	0	0	0
ARS720	0	0	0	1	0	0	0	0	0	1	0	0	0	0
ARS721	0	0	0	0	0	0	0	0	0	0	0	0	0	0
ARS722	0	1	0	0	1	1	1	0	1	0	0	0	1	0
ARS727	0	1	0	3	0	0	4	0	7	4	0	0	1	0
ARS728	0	0	0	0	0	1	0	1	1	0	7	0	0	0
ARS729	0	0	0	0	0	0	0	4	0	1	2	0	0	0
ARS731	0	1	0	0	0	0	1	0	0	0	14	0	0	2
ARS733	4	4	3	8	1	9	4	1	5	1	7	6	11	10
ARS734	2	0	0	2	0	1	1	1	0	1	0	1	1	1
ARS737	1	1	1	1	0	2	1	0	1	0	0	1	1	0
ARS802	0	0	1	5	1	0	3	0	2	2	0	0	2	1
ARS805	1	0	0	1	0	0	1	0	0	0	0	1	0	0
ARS807	1	0	0	0	0	0	0	0	0	0	0	0	0	0
ARS809	0	0	1	2	1	0	0	0	0	2	1	2	2	2
ARS813	0	0	0	0	0	0	1	0	0	1	2	1	0	0
ARS818	1	0	1	2	0	0	0	1	0	0	0	0	0	0
ARS820	4	0	0	1	1	0	0	10	3	1	0	1	0	0
ARS822	3	0	0	0	0	0	0	0	0	0	0	0	0	0
ARS909	0	0	0	0	0	0	4	0	0	0	1	0	0	0
ARS911	0	0	1	0	0	0	0	5	3	0	3	1	0	1
ARS913	14	3	2	36	9	136	23	16	19	14	16	18	48	101
ARS914	0	0	0	0	0	0	0	0	2	0	0	0	0	0
ARS919	0	0	1	14	0	6	0	1	0	0	0	2	0	1
ARS920	0	0	0	0	0	1	0	0	1	2	0	0	0	2
ARS922	0	0	0	1	0	0	0	0	0	0	0	0	1	0
ARS923	0	0	1	0	0	0	0	1	0	2	0	0	0	0
HRA1	0	0	0	0	0	1	2	0	0	0	0	0	0	0
LSR1	9217	7464	8017	5356	3353	5178	11745	12627	12124	8106	5646	5887	7215	8304
NME1	1653	1446	1846	1176	1149	1029	2875	2658	4063	2622	1910	2010	1858	1971
RDN37-1	23297943	21392122	22123475	21938468	21265768	22639330	21765109	20662803	21276571	21760791	21182724	19734568	19667143	20591655
RNA170	0	0	0	1	0	0	0	0	0	4	0	1	3	0
RPR1	1329	1328	1170	825	607	694	1555	1935	2164	1268	1158	1120	1163	1389
RUF5-1	0	0	0	0	0	0	0	0	0	0	0	0	0	0
RUF5-2	0	0	1	2	0	10	17	0	6	3	1	2	5	0
SCR1	10016	9729	13231	10855	11360	9881	26675	24558	26552	16468	17045	16573	11556	9400
snR10	1261	801	898	597	335	450	800	822	794	746	528	519	791	715
snR11	16626	10285	8121	4842	1756	2876	8771	6557	7534	2036	3400	3763	9315	9838
snR128	2988	1798	1898	809	672	916	1370	1573	1859	1728	898	970	1151	1292
snR13	424	315	317	143	84	118	214	220	218	132	155	167	243	243
snR14	708	694	734	433	199	308	1125	1211	924	549	461	473	727	482
snR161	131	70	76	54	42	59	115	108	187	112	77	90	71	77
snR17b	876	768	560	293	223	215	361	481	449	414	389	356	659	614
snR18	111	144	118	87	94	77	140	148	253	150	120	92	217	265
snR189	131	73	114	124	45	62	145	223	265	100	110	57	131	102
snR19	3394	2560	3070	2473	1566	2596	4582	5996	6725	5174	2825	3178	3186	3369
snR190	1292	1165	1009	824	699	724	1032	1301	1289	1525	952	1043	1306	1555
snR191	550	413	434	244	198	271	340	421	490	381	276	352	388	369
snR24	32	22	27	11	7	16	18	53	50	57	40	42	40	56
snR3	585	579	513	366	303	344	920	1135	962	649	510	553	1134	805
snR30	6432	4817	5012	2800	2452	2752	5540	6171	7174	5950	3950	4426	5051	5374
snR31	325	327	297	147	126	139	241	293	294	172	173	169	237	240
snR32	565	414	353	325	203	328	529	676	635	439	316	320	434	358
snR33	376	271	234	178	125	193	201	426	312	269	222	195	219	207
snR34	329	212	236	229	144	194	308	347	397	294	193	209	299	262
snR35	4210	3455	3035	1890	1405	1960	2881	3330	4286	2762	2262	2284	1858	2131
snR36	133	65	61	56	34	36	106	99	74	123	42	64	110	122
snR37	1849	894	967	764	462	660	1169	1459	1485	1605	951	941	1174	1617
snR39	56	34	34	30	28	36	37	56	51	62	60	34	52	43
snR39B	147	78	80	34	38	67	56	81	73	107	52	55	111	107
snR4	277	233	192	180	148	212	348	360	410	320	199	218	328	362
snR40	96	90	90	68	60	35	133	141	162	109	76	83	117	91
snR41	258	166	122	70	54	86	117	185	143	172	85	95	138	109
snR42	2094	1326	1434	836	837	814	1780	1867	1961	1062	1032	1188	1555	1193
snR43	448	246	196	243	200	238	412	535	603	330	259	263	487	373
snR45	263	183	151	158	101	149	355	390	346	193	146	161	381	314
snR46	226	154	99	99	45	85	175	178	211	132	125	111	136	158
snR47	182	163	145	243	129	186	251	270	297	248	194	216	214	210
snR48	966	685	1025	263	167	256	351	352	556	445	308	310	537	556
snR49	122	93	93	46	61	80	86	108	78	120	103	105	111	96
snR5	310	262	358	192	90	187	178	275	318	200	190	193	401	395
snR50	44	54	37	42	46	45	24	66	58	64	25	32	59	65
snR51	56	38	119	33	35	22	43	69	83	49	34	17	48	57
snR52	508	308	365	218	203	242	413	555	527	574	268	291	494	617
snR53	7	1	5	2	9	13	3	7	4	12	6	10	17	8
snR54	42	53	36	38	39	47	40	62	36	73	54	42	87	74
snR55	69	60	38	24	43	23	41	73	49	60	39	35	63	60
snR56	191	136	146	83	59	99	215	195	153	179	120	138	178	170
snR57	66	46	124	45	28	27	66	37	45	131	88	36	36	101
snR58	80	57	47	21	27	24	45	25	60	47	45	32	33	53
snR6	68	67	69	71	70	68	175	232	234	142	92	120	82	93
snR60	438	219	552	88	98	135	118	187	215	273	115	118	211	299
snR61	432	236	306	192	184	267	342	293	352	319	188	200	291	485
snR62	8	8	27	20	18	33	40	27	34	64	28	14	34	70
snR63	496	482	398	312	256	344	307	498	711	477	361	411	532	718
snR64	47	75	77	86	73	79	112	145	142	82	72	69	108	69
snR65	11	2	6	0	8	3	14	72	8	8	5	19	8	2
snR66	145	147	90	85	70	80	128	168	135	122	67	70	127	120
snR67	29	28	22	32	27	34	31	42	52	25	34	34	44	30
snR68	100	77	71	68	30	21	96	51	43	72	58	28	106	75
snR69	66	60	34	62	28	37	44	54	63	70	46	46	89	103
snR7-L	0	0	0	0	0	0	0	0	0	0	0	0	0	0
snR7-S	694	679	833	490	306	372	1319	1617	2154	891	886	907	1037	924
snR70	807	543	405	269	135	264	378	440	449	446	346	287	586	607
snR71	65	49	64	55	21	55	39	82	91	72	70	92	82	63
snR78|77|76|75|74|73|72	1731	1019	1275	628	387	591	709	1065	927	1805	936	878	874	1272
snR79	16	43	22	23	11	19	25	33	36	28	25	21	21	20
snR8	999	803	593	432	287	389	488	538	677	540	430	406	501	467
snR80	547	446	961	178	142	250	354	569	549	381	302	361	452	480
snR81	119	130	86	87	83	70	164	244	214	100	90	85	140	115
snR82	390	314	307	273	187	250	325	475	519	449	324	339	434	453
snR83	416	313	316	252	122	266	408	390	364	409	212	209	448	478
snR84	449	354	319	291	183	263	538	508	471	354	281	286	325	424
snR85	580	489	449	245	242	229	626	586	702	370	283	219	339	291
snR86	1621	1355	1114	935	666	968	1216	1492	1343	1089	853	864	1203	1409
snR87	400	276	196	144	82	110	192	233	267	241	147	146	230	286
snR9	557	386	329	225	186	278	424	530	510	414	277	302	344	344
SRG1	34	20	43	158	38	37	167	114	100	60	59	60	44	37
tA(AGC)D	19	20	12	43	25	21	37	41	35	28	31	30	46	55
tA(AGC)F	2	5	7	4	5	3	10	13	16	5	9	3	16	23
tA(AGC)G	0	2	6	7	0	5	6	3	1	1	1	3	12	5
tA(AGC)H	1	5	11	5	5	2	9	13	7	1	4	11	9	8
tA(AGC)J	0	0	0	0	0	0	0	0	0	0	0	0	0	0
tA(AGC)K1	0	2	2	1	1	2	5	4	1	1	0	1	6	0
tA(AGC)K2	2	5	3	4	6	2	5	4	11	8	5	9	1	7
tA(AGC)L	7	7	7	9	10	4	9	10	12	7	9	11	19	7
tA(AGC)M1	1	2	6	4	2	6	4	1	2	0	0	0	7	1
tA(AGC)M2	1	0	0	0	2	0	3	0	0	3	0	1	3	0
tA(AGC)P	0	0	3	1	2	1	3	1	1	2	2	1	5	2
tA(UGC)A	67	130	94	207	200	141	378	255	266	210	185	120	465	441
tA(UGC)E	5	12	16	17	17	11	32	32	29	22	22	19	48	36
tA(UGC)G	11	10	11	19	20	11	36	21	24	15	18	12	38	30
tA(UGC)L	16	15	15	19	17	18	42	23	32	22	30	21	52	33
tA(UGC)O	0	6	4	4	7	1	10	5	10	4	10	4	11	4
tC(GCA)B	312	395	350	428	402	382	595	464	513	579	539	481	1341	1329
tC(GCA)G	7	5	12	14	13	18	14	28	17	13	22	15	35	24
tC(GCA)P1	0	2	4	4	1	2	0	2	2	4	3	3	4	2
tC(GCA)P2	0	2	0	1	0	1	0	1	3	0	0	0	1	3
tD(GUC)B	153	221	186	298	210	246	441	338	381	186	288	255	1007	964
tD(GUC)D	27	36	45	114	101	102	162	111	135	94	105	108	263	202
tD(GUC)G1	8	11	14	6	15	11	24	20	18	18	24	10	32	33
tD(GUC)G2	33	24	57	37	36	18	62	44	38	42	50	39	158	164
tD(GUC)I1	3	3	0	2	4	1	4	7	7	1	1	1	2	8
tD(GUC)I2	1	1	0	5	1	0	3	1	0	2	1	1	5	3
tD(GUC)J1	0	0	0	0	0	0	0	3	0	3	1	0	3	0
tD(GUC)J2	0	0	0	0	0	0	0	0	0	0	0	0	0	0
tD(GUC)J3	0	0	0	0	0	1	0	0	0	0	0	0	0	0
tD(GUC)J4	0	0	2	0	0	0	1	2	0	1	1	1	1	6
tD(GUC)K	0	1	0	4	0	0	1	1	4	1	2	3	2	1
tD(GUC)L1	0	1	1	4	3	4	11	4	8	1	5	4	10	7
tD(GUC)L2	6	6	4	7	6	6	12	13	9	1	10	1	13	12
tD(GUC)M	0	2	1	0	0	1	0	2	3	1	0	5	9	1
tD(GUC)N	4	19	8	13	5	7	7	8	6	7	5	8	10	25
tD(GUC)O	1	0	3	1	1	4	6	1	2	1	1	1	1	1
tE(CUC)D	287	395	421	432	447	409	1039	827	835	552	534	522	7179	6863
tE(CUC)I	28	40	28	55	37	42	163	107	93	42	55	52	619	615
tE(UUC)B	477	655	588	876	769	811	1416	1043	1141	847	1053	784	10039	9517
tE(UUC)C	102	138	163	337	233	245	416	320	389	251	343	222	4782	4871
tE(UUC)E1	0	1	0	0	0	0	1	0	0	0	0	0	0	0
tE(UUC)E2	76	143	112	215	152	171	399	310	309	231	319	198	3591	4259
tE(UUC)E3	40	60	70	99	73	73	154	117	99	94	140	90	1608	1911
tE(UUC)G1	5	9	8	9	6	9	20	20	16	19	16	11	97	99
tE(UUC)G2	6	2	9	12	11	6	15	7	15	4	5	10	102	135
tE(UUC)G3	59	85	77	186	153	146	347	227	264	146	233	164	3385	3220
tE(UUC)I	17	30	21	48	41	43	75	68	91	45	57	33	780	771
tE(UUC)J	0	0	0	0	0	0	0	0	0	0	0	0	0	0
tE(UUC)K	36	62	39	141	80	105	216	139	164	138	110	105	2387	2158
tE(UUC)L	77	127	111	214	182	198	370	246	276	285	283	203	3971	4108
tE(UUC)M	44	73	49	134	106	108	149	128	125	117	187	133	2013	2010
tE(UUC)P	17	29	31	44	39	43	80	59	62	51	45	47	790	766
TEL01L-TR	7	6	4	11	9	5	3	4	5	12	2	5	5	4
TEL01L-XC	0	0	0	1	0	0	0	0	1	0	0	0	0	0
TEL01L-XR	0	0	0	0	0	0	1	0	1	1	1	0	0	1
TEL01R-TR	1	2	2	4	0	0	4	5	2	1	1	3	3	2
TEL01R-XC	0	0	0	0	0	0	0	0	0	1	1	0	1	0
TEL02L-XC	1	0	1	0	0	0	0	1	0	0	0	0	0	0
TEL02L-XR	0	0	0	0	0	0	0	0	1	0	0	0	0	0
TEL02L-YP	1187	1006	1070	2440	2119	2659	2647	2331	2108	1673	1306	1360	1165	1110
TEL02R-TR	0	2	3	4	3	7	3	1	5	2	0	4	4	4
TEL02R-XC	0	0	0	0	0	0	0	2	0	0	1	0	0	1
TEL02R-XR	1	0	0	0	0	2	1	1	1	0	0	6	2	0
TEL03L-TR	31	20	16	88	19	24	28	26	19	14	21	11	23	14
TEL03L-XC	0	0	0	0	0	0	0	0	1	1	0	0	0	0
TEL03L-XR	0	0	0	0	0	0	0	1	0	0	1	0	1	0
TEL03R-TR	0	1	2	2	2	2	0	1	1	3	2	1	1	0
TEL03R-XC	0	0	0	0	0	0	0	0	0	0	0	0	0	0
TEL03R-XR	0	0	0	0	1	0	0	0	0	0	1	0	0	2
TEL04L-TR	4	6	9	25	9	5	11	19	6	6	5	7	7	4
TEL04L-XC	0	1	0	0	0	0	0	0	0	0	0	0	0	0
TEL04L-XR	0	0	0	0	0	0	0	1	0	0	0	0	0	0
TEL04R-TR	11	17	7	116	18	17	13	18	12	7	9	16	8	11
TEL04R-XC	0	0	0	0	0	0	0	0	2	0	0	0	0	0
TEL04R-XR	0	0	1	0	0	0	0	0	0	0	0	0	0	0
TEL04R-YP	439	354	295	780	684	903	809	742	688	527	396	437	395	407
TEL05L-XC	0	0	0	0	0	0	0	0	0	0	0	0	0	0
TEL05L-YP	92	59	41	138	128	130	93	116	129	101	63	73	69	75
TEL05R-XC	1	0	0	0	0	0	0	0	0	0	0	0	0	0
TEL05R-XR	0	1	0	0	0	3	0	0	1	1	0	0	0	0
TEL05R-YP	65	54	53	135	104	121	95	113	98	74	67	73	74	51
TEL06L-TR	5	5	5	47	4	6	9	8	3	8	2	7	12	4
TEL06L-XC	1	0	0	0	0	0	0	1	0	0	0	1	0	0
TEL06L-XR	1	0	0	0	0	0	0	0	0	0	0	1	1	0
TEL06L-YP	6	10	10	27	20	18	16	35	11	12	16	21	10	14
TEL06R-TR	0	0	0	0	0	0	0	0	0	0	0	0	0	0
TEL06R-XC	2	1	0	1	1	0	1	1	0	0	0	1	2	1
TEL07L-TR	0	0	0	0	0	0	0	0	0	0	0	0	0	0
TEL07L-XC	0	0	0	0	0	0	0	0	0	1	0	0	0	0
TEL07L-XR	0	0	1	1	0	0	0	0	0	0	0	0	1	0
TEL07R-XC	2	0	1	0	0	0	1	1	2	0	0	0	0	0
TEL07R-XR	0	0	0	0	0	0	1	0	0	0	1	0	0	0
TEL07R-YP	4	2	3	20	9	9	40	13	20	11	3	14	5	10
TEL08L-TR	0	0	0	0	0	0	0	0	0	0	0	0	0	0
TEL08L-XC	0	0	0	0	1	0	0	0	0	0	0	0	0	0
TEL08L-XR	0	0	0	0	0	1	0	0	0	0	1	0	0	0
TEL08L-YP	12	5	17	18	17	24	18	19	18	9	8	13	10	13
TEL08R-TR1	3	3	0	5	2	1	3	8	1	2	0	1	3	3
TEL08R-TR2	6	2	6	32	7	10	4	9	1	6	4	11	8	3
TEL08R-XC	1	0	0	0	0	0	1	2	1	0	0	2	0	0
TEL08R-XR	1	1	0	2	0	0	1	0	1	0	0	0	0	0
TEL08R-YP	1	1	1	6	1	5	11	8	10	3	7	4	4	4
TEL09L-TR	5	0	3	33	7	10	9	6	3	5	6	6	5	7
TEL09L-XC	0	0	0	0	0	0	0	0	0	0	0	0	0	0
TEL09L-XR	1	3	1	0	3	1	1	0	1	0	1	0	1	2
TEL09L-YP	21	13	18	37	25	59	49	27	20	27	6	33	22	36
TEL09R-TR	0	0	0	0	0	0	0	2	0	0	0	0	0	0
TEL09R-XC	0	1	0	0	0	0	0	0	0	0	0	0	0	1
TEL09R-XR	0	0	0	0	0	0	0	1	1	1	0	1	0	0
TEL10L-TR	0	1	2	0	1	0	0	0	1	0	0	0	0	1
TEL10L-XC	0	0	0	0	0	0	0	0	0	0	0	0	0	0
TEL10L-XR	0	0	0	0	0	0	0	0	0	0	0	0	0	0
TEL10L-YP	0	0	0	0	0	0	0	0	0	0	0	0	0	0
TEL10R-TR	0	1	0	2	0	2	1	1	0	0	0	0	0	1
TEL10R-XC	0	0	0	0	0	0	0	0	0	0	0	0	0	0
TEL10R-XR	0	0	0	0	0	0	0	0	0	0	0	0	1	0
TEL11L-TR	0	0	1	0	0	0	0	0	0	0	0	1	0	0
TEL11L-XC	1	0	0	0	0	0	0	0	0	0	0	0	1	0
TEL11L-XR	0	0	0	0	2	2	0	0	0	1	0	2	0	0
TEL11R-TR	9	10	9	43	9	22	17	19	16	10	1	17	16	16
TEL11R-XC	0	0	0	0	0	0	1	0	0	0	0	0	0	0
TEL11R-XR	1	0	2	6	1	0	2	0	0	0	0	0	3	3
TEL12L-TR1	19	13	7	11	7	9	10	6	23	10	4	6	10	14
TEL12L-TR2	0	0	0	0	0	0	0	0	0	0	0	2	0	0
TEL12L-TR3	4	5	8	61	8	3	11	9	4	2	2	3	5	8
TEL12L-XC	2	5	0	3	2	2	3	2	1	0	1	7	0	1
TEL12L-XR	0	0	0	0	0	0	0	0	0	0	0	0	1	0
TEL12L-YP1	6	0	5	7	6	11	4	7	15	4	1	2	1	2
TEL12L-YP2	2	1	0	0	0	0	2	1	0	0	1	0	1	0
TEL12R-TR1	0	0	0	0	0	0	0	0	0	0	0	0	0	0
TEL12R-TR2	1	7	15	86	24	17	24	11	16	14	9	13	18	8
TEL12R-XC	0	0	0	0	0	1	0	0	1	0	0	0	0	0
TEL12R-XR	0	0	1	0	0	1	1	0	1	1	0	0	2	0
TEL12R-YP1	0	0	0	0	0	0	0	0	0	0	0	0	0	0
TEL12R-YP2	1	0	0	1	0	0	1	1	3	0	0	0	1	1
TEL13L-TR1	0	0	0	0	0	0	0	0	0	0	0	0	0	0
TEL13L-TR2	0	0	0	0	0	0	0	0	0	0	0	0	0	0
TEL13L-XC	0	0	0	0	0	0	0	0	0	0	0	0	0	0
TEL13L-XR	0	0	0	0	0	0	0	0	0	0	0	0	0	0
TEL13L-YP	2	1	0	0	1	0	1	0	0	1	1	1	0	3
TEL13R-TR	2	0	3	6	2	4	3	4	1	2	2	1	2	1
TEL13R-XC	0	0	0	0	0	0	1	0	1	0	0	0	0	0
TEL13R-XR	1	2	2	16	4	4	3	2	0	0	2	3	4	1
TEL14L-TR	0	0	0	1	0	0	0	0	0	0	0	0	0	0
TEL14L-XC	0	0	0	0	0	0	0	0	0	0	0	0	0	0
TEL14L-XR	0	0	2	0	0	0	0	0	1	0	1	1	2	1
TEL14L-YP	2	2	1	0	1	0	1	0	1	0	0	1	1	0
TEL14R-TR	3	4	6	12	5	9	2	8	0	2	3	2	2	2
TEL14R-XC	0	0	0	0	0	0	0	0	0	0	1	0	0	0
TEL14R-XR	1	0	0	0	1	1	0	0	0	0	0	1	1	2
TEL15L-TR	7	3	6	15	3	4	2	5	11	8	2	2	8	5
TEL15L-XC	0	0	0	1	1	0	1	0	0	0	0	1	0	1
TEL15L-XR	3	0	0	3	2	2	3	2	1	2	4	3	2	1
TEL15R-TR	0	0	0	0	0	0	0	0	0	0	0	0	0	0
TEL15R-XC	1	0	0	0	0	0	0	0	0	0	0	0	0	1
TEL15R-XR	0	0	0	0	0	0	0	0	0	0	0	0	0	0
TEL15R-YP	0	0	0	0	1	0	0	0	0	0	0	0	0	0
TEL16L-XC	0	0	0	1	0	0	0	0	0	0	0	0	0	0
TEL16L-XR	0	0	0	0	0	0	0	0	0	0	0	0	0	0
TEL16L-YP	0	0	0	1	0	2	0	0	0	0	0	0	0	1
TEL16R-XC	0	0	0	1	0	0	0	0	0	1	0	0	0	0
TEL16R-YP	2	7	2	0	2	2	2	1	5	4	1	5	2	7
tF(GAA)B	15	22	29	31	35	16	11	21	16	16	9	25	63	47
tF(GAA)D	11	12	9	15	7	7	8	17	7	15	10	13	14	14
tF(GAA)F	14	17	19	11	14	9	7	24	9	17	10	15	17	32
tF(GAA)G	3	6	0	1	2	2	3	2	3	1	4	0	11	14
tF(GAA)H1	3	6	7	0	1	2	0	1	3	2	0	1	5	2
tF(GAA)H2	0	0	1	3	1	0	1	0	4	1	0	0	5	5
tF(GAA)M	4	3	5	0	1	1	1	1	0	1	1	3	10	4
tF(GAA)N	0	1	8	2	1	2	5	0	4	2	0	2	1	1
tF(GAA)P1	2	3	0	2	0	3	2	6	2	3	1	0	6	5
tF(GAA)P2	2	0	0	2	0	8	4	0	1	0	4	3	9	0
tG(CCC)D	11	14	18	39	28	24	71	41	39	20	34	31	69	58
tG(CCC)O	58	71	91	98	98	71	200	103	158	70	111	55	303	289
tG(GCC)B	74	117	94	195	175	149	287	206	283	127	176	146	548	419
tG(GCC)C	8	6	5	7	8	2	8	6	2	5	6	8	15	13
tG(GCC)D1	3	9	4	7	10	6	13	11	11	9	4	10	39	28
tG(GCC)D2	19	19	19	37	40	27	67	41	43	15	35	25	137	77
tG(GCC)E	3	9	4	6	7	3	13	6	11	4	4	4	19	11
tG(GCC)F1	4	5	2	3	3	3	11	4	7	2	5	2	10	11
tG(GCC)F2	3	1	1	7	6	3	9	5	4	3	1	4	20	13
tG(GCC)G1	9	8	4	11	8	3	15	15	12	10	6	12	28	31
tG(GCC)G2	3	0	2	5	2	3	5	2	0	1	4	1	12	4
tG(GCC)J1	0	0	0	0	0	0	0	0	0	0	0	0	0	0
tG(GCC)J2	0	0	0	0	0	0	0	0	0	0	0	0	0	0
tG(GCC)M	3	1	3	10	5	2	8	10	6	3	8	6	18	11
tG(GCC)O1	3	8	6	11	5	8	15	4	8	2	8	9	20	14
tG(GCC)O2	0	1	0	0	1	0	2	3	3	2	3	2	6	4
tG(GCC)P1	0	1	1	2	0	3	3	0	1	0	3	0	1	3
tG(GCC)P2	2	5	1	7	3	3	7	7	9	1	9	4	21	16
tG(UCC)G	19	44	25	46	53	36	80	29	66	61	63	58	144	84
tG(UCC)N	10	9	8	20	19	12	44	18	24	10	19	22	30	23
tG(UCC)O	3	10	8	15	9	7	26	22	21	9	10	17	22	19
tH(GUG)E1	84	124	111	131	121	125	214	154	187	168	149	131	789	671
tH(GUG)E2	37	60	77	101	99	89	199	138	183	120	138	122	783	690
tH(GUG)G1	29	22	30	47	44	43	114	60	68	52	62	36	509	359
tH(GUG)G2	13	28	41	42	40	40	81	47	72	53	63	33	367	314
tH(GUG)H	22	31	38	47	40	44	91	82	73	67	71	60	413	401
tH(GUG)K	17	21	14	17	24	32	45	29	38	48	45	53	219	162
tH(GUG)M	12	12	5	10	9	9	13	9	11	8	10	9	25	43
tI(AAU)B	21	17	35	49	50	43	49	35	37	50	37	50	63	61
tI(AAU)D	2	0	1	7	1	1	4	3	0	1	1	0	2	2
tI(AAU)E1	0	3	1	0	1	1	0	0	0	0	2	0	0	0
tI(AAU)E2	0	2	0	0	0	1	0	1	0	0	5	0	0	0
tI(AAU)G	1	0	2	0	0	3	1	1	0	4	0	0	2	3
tI(AAU)I1	2	11	4	1	5	4	14	2	8	7	5	4	3	12
tI(AAU)I2	0	0	1	0	0	0	0	0	0	1	0	0	2	2
tI(AAU)L1	0	0	0	0	1	1	0	0	0	0	0	0	0	0
tI(AAU)L2	0	0	0	0	0	0	0	0	0	1	0	1	0	1
tI(AAU)N1	0	0	1	1	1	0	0	0	1	0	0	1	0	0
tI(AAU)N2	0	0	0	1	1	2	0	2	1	0	3	1	1	1
tI(AAU)P1	2	0	0	0	1	0	0	1	0	1	1	1	2	1
tI(AAU)P2	1	0	2	2	1	2	2	1	1	2	1	2	0	1
tI(UAU)D	86	108	94	68	54	45	98	79	133	110	100	93	77	82
tI(UAU)L	8	13	10	10	3	7	10	15	13	4	9	2	17	8
tK(CUU)C	68	80	101	100	84	91	95	63	78	108	115	94	305	283
tK(CUU)D1	21	16	16	31	16	20	32	10	9	18	18	16	54	51
tK(CUU)D2	2	3	4	6	7	4	8	3	8	6	11	5	24	19
tK(CUU)E1	0	0	2	0	1	0	0	0	1	0	1	0	4	3
tK(CUU)E2	0	0	0	0	1	0	0	0	0	1	2	1	0	0
tK(CUU)F	4	0	0	1	1	1	2	0	3	2	2	0	1	4
tK(CUU)G1	0	2	2	2	2	3	4	5	6	1	6	2	16	15
tK(CUU)G2	0	0	0	0	0	1	0	0	0	0	0	0	3	0
tK(CUU)G3	0	0	0	0	0	2	0	1	0	2	2	2	1	5
tK(CUU)I	0	0	2	0	1	0	1	0	0	0	1	0	0	0
tK(CUU)J	0	0	0	0	0	0	0	0	0	0	0	0	0	0
tK(CUU)K	0	4	0	0	0	0	2	0	0	0	0	0	1	1
tK(CUU)M	3	4	6	1	6	5	4	7	3	4	6	4	24	14
tK(CUU)P	0	0	0	0	0	0	0	0	0	0	1	0	1	0
tK(UUU)D	39	39	36	36	30	36	39	49	46	28	38	38	38	66
tK(UUU)G1	0	0	1	0	1	1	3	0	0	0	0	0	1	0
tK(UUU)G2	1	1	2	2	1	4	6	0	1	1	3	3	1	1
tK(UUU)K	4	0	0	0	1	0	1	1	1	0	0	0	0	0
tK(UUU)L	3	0	0	0	0	0	0	0	0	0	0	0	0	0
tK(UUU)O	0	0	1	0	0	0	0	0	0	0	0	0	0	0
tK(UUU)P	0	1	0	0	1	0	0	4	0	0	0	0	0	0
tL(CAA)A	48	83	69	60	46	55	109	84	116	78	83	72	150	194
tL(CAA)C	11	11	6	8	17	6	6	13	15	13	7	10	18	29
tL(CAA)D	11	19	6	3	12	12	14	13	11	8	22	10	26	32
tL(CAA)G1	18	3	1	3	7	12	8	8	5	6	13	6	8	10
tL(CAA)G2	0	4	0	1	1	0	0	0	5	0	1	20	4	10
tL(CAA)G3	13	2	10	8	4	3	4	5	3	4	2	17	14	15
tL(CAA)K	5	0	3	4	4	7	5	3	9	4	4	1	3	4
tL(CAA)L	11	13	10	6	4	13	6	8	6	7	14	8	6	32
tL(CAA)M	4	0	2	1	1	0	4	0	1	1	1	0	9	6
tL(CAA)N	2	0	0	0	0	0	3	4	3	0	0	0	1	3
tL(GAG)G	4	7	8	11	8	11	20	17	20	3	7	13	29	26
tL(UAA)B1	10	22	21	33	16	12	55	36	38	10	24	34	67	53
tL(UAA)B2	48	42	65	77	62	37	127	88	114	45	51	56	153	144
tL(UAA)D	21	37	35	61	47	39	90	63	77	41	51	59	135	97
tL(UAA)J	0	0	0	0	0	0	0	1	0	0	0	0	0	0
tL(UAA)K	7	4	5	2	6	19	18	17	14	7	8	5	24	20
tL(UAA)L	0	0	3	0	0	0	4	0	0	1	1	0	0	0
tL(UAA)N	0	1	0	0	0	0	0	0	0	0	0	0	1	0
tL(UAG)J	13	9	18	9	11	13	14	17	30	18	16	22	26	20
tL(UAG)L1	1	2	14	0	0	4	2	3	2	1	3	5	9	4
tL(UAG)L2	0	0	0	1	0	0	0	0	4	0	0	1	0	0
TLC1	206	147	125	194	92	209	248	280	330	316	213	229	233	254
tM(CAU)C	2	1	6	7	2	2	6	1	4	5	3	1	6	9
tM(CAU)D	8	5	16	15	9	18	19	5	11	13	10	12	34	12
tM(CAU)E	0	1	1	0	0	3	1	1	0	2	0	2	1	5
tM(CAU)J1	0	0	0	0	0	0	2	0	1	0	0	0	0	0
tM(CAU)J2	1	0	2	0	1	5	0	0	6	1	0	4	0	1
tM(CAU)J3	0	0	0	0	1	0	0	0	0	0	0	0	0	0
tM(CAU)M	0	1	0	4	1	2	0	0	0	0	2	2	2	5
tM(CAU)O1	1	3	0	0	0	0	0	1	0	0	0	0	0	1
tM(CAU)O2	0	1	0	2	4	0	3	3	1	1	2	1	1	0
tM(CAU)P	1	0	0	0	0	1	0	0	1	0	0	0	0	0
tN(GUU)C	19	20	22	30	25	34	34	15	17	63	41	30	73	62
tN(GUU)F	0	3	1	1	3	3	2	3	2	0	4	2	2	11
tN(GUU)G	0	0	1	2	0	0	4	1	1	0	1	3	0	0
tN(GUU)K	11	1	7	5	6	1	5	2	6	9	6	11	10	7
tN(GUU)L	0	0	0	1	0	1	0	1	1	0	1	0	3	1
tN(GUU)N1	0	0	0	2	0	0	3	0	1	0	0	2	0	0
tN(GUU)N2	0	0	1	0	1	0	0	0	0	0	1	3	0	0
tN(GUU)O1	0	0	0	0	0	1	0	0	0	0	1	2	0	1
tN(GUU)O2	0	0	0	0	0	0	0	0	1	0	0	0	0	0
tN(GUU)P	0	1	2	0	0	2	3	1	0	0	0	0	1	0
tP(AGG)C	19	42	28	39	43	19	37	29	43	28	21	13	75	76
tP(AGG)N	0	1	2	2	5	4	2	0	2	3	1	2	1	0
tP(UGG)A	196	227	214	180	183	181	248	222	268	152	153	149	229	211
tP(UGG)F	21	17	18	25	21	10	30	33	26	24	26	19	36	31
tP(UGG)H	82	70	89	78	61	45	46	53	78	83	77	61	87	95
tP(UGG)L	24	20	23	18	14	14	11	13	11	26	20	8	11	34
tP(UGG)M	1	1	0	1	0	1	2	1	3	2	0	1	3	4
tP(UGG)N1	0	0	3	2	0	0	2	0	5	3	2	2	5	3
tP(UGG)N2	2	4	5	7	7	2	3	3	4	6	2	3	6	3
tP(UGG)O1	1	1	4	3	1	7	1	4	5	2	1	5	0	9
tP(UGG)O2	17	27	13	12	9	4	24	6	12	24	12	11	20	18
tP(UGG)O3	10	18	15	21	13	10	12	21	12	16	12	17	28	19
tQ(CUG)M	368	580	582	767	660	613	1594	980	1086	1138	986	863	2199	1865
tQ(UUG)B	69	87	69	96	107	94	103	65	61	83	71	90	266	156
tQ(UUG)C	1521	2227	2471	1640	1492	1201	2493	1712	1833	1769	1845	1436	16253	13623
tQ(UUG)D1	0	0	4	3	2	3	5	4	4	1	1	2	5	4
tQ(UUG)D2	0	0	0	2	0	3	0	1	2	1	0	2	1	0
tQ(UUG)D3	1	3	3	0	1	0	2	2	2	1	6	1	7	6
tQ(UUG)E1	0	0	3	0	0	0	0	0	1	0	0	1	2	0
tQ(UUG)E2	4	4	7	17	6	16	22	10	8	15	15	12	58	33
tQ(UUG)H	0	1	2	4	2	0	0	0	0	0	0	0	3	0
tQ(UUG)L	0	0	0	1	0	0	1	2	1	0	0	0	3	1
tR(ACG)D	28	21	19	20	24	13	51	32	25	24	30	5	47	41
tR(ACG)E	1	9	9	0	2	1	3	4	1	3	3	2	3	6
tR(ACG)J	1	0	4	1	0	0	1	0	0	2	1	3	1	0
tR(ACG)K	3	4	1	3	11	4	30	21	11	8	9	1	14	7
tR(ACG)L	0	3	2	1	0	0	0	0	4	0	0	0	0	1
tR(ACG)O	0	1	0	0	0	0	0	0	2	0	1	1	3	0
tR(CCG)L	9	7	6	15	16	10	26	18	30	6	20	8	16	18
tR(CCU)J	0	0	0	0	0	0	0	0	1	0	0	0	1	0
tR(UCU)B	68	79	87	122	111	81	136	89	112	114	107	76	167	131
tR(UCU)D	0	0	0	0	0	0	0	0	0	0	0	0	0	0
tR(UCU)E	5	5	14	11	9	24	11	9	13	5	11	5	13	11
tR(UCU)G1	1	1	2	0	1	0	2	1	5	4	2	1	2	10
tR(UCU)G2	3	0	0	5	2	1	4	1	1	2	6	2	1	1
tR(UCU)G3	4	11	3	13	4	7	15	12	18	13	13	9	14	14
tR(UCU)J1	0	0	0	0	0	0	0	0	0	0	0	0	0	0
tR(UCU)J2	0	0	0	0	0	0	0	0	0	0	0	0	0	0
tR(UCU)K	1	0	0	0	3	4	0	0	2	4	0	0	3	1
tR(UCU)M1	0	1	1	1	2	1	2	2	2	0	1	0	2	1
tR(UCU)M2	0	0	1	1	1	0	3	1	1	0	5	5	7	1
tS(AGA)A	120	152	132	168	176	182	372	259	290	180	219	120	627	477
tS(AGA)B	3	4	7	10	8	7	15	11	5	8	8	13	31	25
tS(AGA)D1	31	44	55	79	68	55	144	87	98	61	87	38	344	230
tS(AGA)D2	13	20	26	31	28	20	85	49	79	32	50	15	197	135
tS(AGA)D3	0	2	11	2	5	5	10	11	9	6	4	4	14	10
tS(AGA)E	2	3	5	2	6	5	24	8	8	2	7	1	21	16
tS(AGA)G	10	3	2	7	4	10	13	11	10	2	6	7	21	24
tS(AGA)H	9	31	26	39	29	25	65	33	70	30	63	26	134	125
tS(AGA)J	0	0	1	4	0	0	0	2	0	0	1	1	1	0
tS(AGA)L	4	0	0	3	1	5	7	0	2	1	0	1	1	3
tS(AGA)M	0	0	2	0	5	2	2	6	5	0	1	1	5	4
tS(CGA)C	33	50	37	73	80	41	114	96	129	66	52	69	228	146
tS(GCU)F	15	22	42	16	30	17	76	67	70	46	45	30	181	142
tS(GCU)L	3	2	3	3	2	3	13	11	14	9	4	3	47	54
tS(GCU)O	6	1	3	0	1	2	6	0	3	2	3	1	14	9
tS(UGA)E	22	36	36	51	49	44	95	73	78	61	48	45	236	147
tS(UGA)I	5	16	10	27	29	25	46	42	46	37	61	35	150	132
tS(UGA)P	8	15	22	17	20	25	50	39	25	25	33	18	116	84
tT(AGU)B	9	16	37	31	27	31	38	35	17	35	48	33	25	40
tT(AGU)C	0	0	0	0	0	2	0	0	0	0	1	0	3	0
tT(AGU)D	4	7	11	0	2	0	9	1	4	4	5	4	4	2
tT(AGU)H	0	1	0	0	0	0	0	0	0	0	0	0	0	0
tT(AGU)I1	0	0	0	0	0	0	0	0	0	0	1	0	0	0
tT(AGU)I2	4	1	2	1	3	1	4	2	1	1	1	4	4	2
tT(AGU)J	1	0	2	0	0	0	0	1	0	3	1	0	0	0
tT(AGU)N1	0	0	0	0	0	0	0	0	0	0	0	0	0	1
tT(AGU)N2	0	1	0	0	0	0	0	0	0	0	0	0	2	0
tT(AGU)O1	0	1	0	0	0	0	0	0	1	0	0	0	0	0
tT(AGU)O2	0	0	0	0	0	0	0	0	0	0	0	1	0	0
tT(CGU)K	20	27	29	86	61	61	116	74	115	60	68	51	90	77
tT(UGU)G1	4	3	8	3	4	0	5	3	10	4	3	2	5	13
tT(UGU)G2	22	15	14	29	27	29	37	27	13	30	28	26	20	19
tT(UGU)H	5	4	1	2	3	5	2	5	3	5	3	7	28	8
tT(UGU)P	10	12	10	11	15	12	19	13	29	17	11	16	20	22
tV(AAC)E1	1	1	2	8	2	3	0	3	1	3	2	1	4	6
tV(AAC)E2	63	72	78	96	86	69	99	84	71	136	97	107	173	118
tV(AAC)G1	2	2	2	4	2	3	2	3	3	2	9	6	4	6
tV(AAC)G2	3	3	6	0	4	3	1	7	7	6	3	3	2	7
tV(AAC)G3	5	10	6	16	9	9	8	7	6	9	14	12	15	17
tV(AAC)H	0	3	0	1	2	0	1	1	0	0	3	0	2	2
tV(AAC)J	0	1	0	0	3	0	0	0	0	2	1	0	0	1
tV(AAC)K1	0	1	0	0	0	1	0	0	0	0	0	0	4	1
tV(AAC)K2	0	0	0	2	1	3	1	1	1	0	1	2	2	2
tV(AAC)L	4	5	0	1	3	2	3	4	7	3	4	3	4	7
tV(AAC)M1	2	9	1	2	2	2	1	3	4	4	7	0	3	4
tV(AAC)M2	7	3	3	4	6	1	4	2	3	4	5	2	6	3
tV(AAC)M3	2	5	0	3	2	2	5	1	4	3	1	0	3	1
tV(AAC)O	1	4	2	5	3	0	3	5	2	1	4	4	5	4
tV(CAC)D	23	20	29	40	47	29	27	32	49	29	51	39	242	159
tV(CAC)H	0	5	3	1	3	0	0	1	7	1	3	2	2	5
tV(UAC)B	6	12	12	20	18	34	28	21	23	18	24	29	53	32
tV(UAC)D	0	0	0	0	0	1	1	3	1	2	3	0	5	2
tW(CCA)G1	236	208	249	265	187	207	348	383	407	330	282	254	380	279
tW(CCA)G2	5	23	2	12	3	10	9	5	5	3	4	6	15	16
tW(CCA)J	3	4	4	5	3	2	14	1	3	2	3	9	8	6
tW(CCA)K	18	5	0	10	11	6	17	21	19	7	10	7	23	17
tW(CCA)M	0	3	1	6	5	0	3	3	7	2	4	4	3	4
tW(CCA)P	2	9	3	10	0	4	21	4	3	4	9	5	8	10
tX(XXX)D	14	22	24	23	24	19	98	53	53	36	54	37	212	183
tY(GUA)D	42	44	53	61	51	66	91	96	88	96	62	90	108	87
tY(GUA)F1	7	10	15	9	15	12	13	14	10	14	13	8	22	14
tY(GUA)F2	1	4	3	2	4	4	5	2	4	3	4	2	3	5
tY(GUA)J1	1	1	1	0	0	0	0	1	4	1	0	1	5	0
tY(GUA)J2	0	0	0	0	0	1	0	0	0	1	0	0	1	0
tY(GUA)M1	0	1	1	0	0	0	0	1	0	0	0	0	0	1
tY(GUA)M2	0	0	0	0	0	0	0	0	0	0	0	0	0	0
tY(GUA)O	0	0	0	0	0	0	0	0	0	0	0	0	0	0
YAL001C	64	62	43	132	144	130	243	187	161	113	82	84	88	91
YAL002W	70	69	58	96	61	85	188	124	198	75	80	72	82	74
YAL003W	125	117	153	134	101	186	97	99	124	197	152	126	125	149
YAL007C	69	56	53	77	61	65	57	49	93	113	94	85	58	95
YAL008W	11	16	27	15	12	20	16	32	32	19	17	20	33	13
YAL009W	6	11	6	35	30	31	48	52	51	60	31	20	20	14
YAL010C	16	15	12	20	10	32	66	58	55	31	31	29	20	26
YAL011W	23	14	19	183	122	166	95	67	78	44	35	31	28	26
YAL012W	343	328	306	378	291	424	305	321	329	467	405	384	289	385
YAL013W	20	11	24	41	48	43	74	46	79	47	56	44	27	39
YAL014C	62	48	45	141	132	132	114	158	121	90	91	74	46	54
YAL016W	298	161	248	212	172	241	465	299	472	340	291	252	218	234
YAL017W	129	82	111	166	96	143	390	321	390	196	156	184	114	97
YAL019W	123	114	108	163	123	116	206	200	215	258	164	199	121	138
YAL020C	14	5	8	15	15	20	18	28	45	23	19	23	3	17
YAL021C	90	118	136	178	172	204	331	328	455	241	183	212	123	170
YAL022C	42	40	38	41	32	53	66	77	79	86	55	49	51	45
YAL023C	341	336	346	305	305	403	376	418	490	466	402	365	326	334
YAL024C	67	33	68	95	76	88	197	169	238	144	134	97	77	116
YAL025C	26	46	74	250	230	210	116	107	159	162	106	134	68	74
YAL026C	201	159	205	200	137	239	240	263	312	345	221	239	171	189
YAL027W	6	5	9	10	24	15	27	12	26	27	17	19	9	20
YAL029C	203	162	137	289	235	290	535	529	621	516	403	383	283	295
YAL030W	2	1	26	4	21	7	35	18	27	19	20	26	11	20
YAL031C	34	26	26	46	40	56	93	111	105	60	73	65	33	93
YAL032C	5	9	15	103	94	85	78	63	66	46	43	35	13	11
YAL033W	22	16	9	17	16	26	28	53	26	14	23	25	16	25
YAL034W-A	11	1	5	32	13	36	21	11	36	31	24	28	3	9
YAL035W	145	138	137	191	229	208	189	220	311	289	251	278	197	254
YAL036C	115	95	96	151	83	106	108	206	141	224	142	170	110	125
YAL037W	4	1	1	2	0	0	3	6	6	4	2	2	0	1
YAL038W	10078	9758	8628	8556	8016	8850	9398	8588	10191	10987	8419	8205	8060	9026
YAL039C	4	5	8	2	3	9	32	22	31	14	13	20	7	4
YAL040C	74	67	65	116	105	146	412	333	491	202	214	174	94	93
YAL041W	48	59	109	126	94	114	219	162	246	179	152	129	80	83
YAL042W	197	191	229	246	209	286	239	326	305	279	249	237	130	163
YAL043C	68	61	44	63	89	96	136	150	137	156	121	103	50	66
YAL044C	92	75	144	116	129	182	467	318	346	220	149	167	106	100
YAL046C	8	16	9	47	53	63	31	46	38	28	24	25	12	17
YAL047C	16	18	22	36	35	40	59	39	41	47	22	33	19	33
YAL048C	18	30	23	18	41	33	98	63	89	60	31	31	33	41
YAL049C	47	35	27	59	46	36	86	69	72	54	61	40	29	43
YAL051W	69	63	48	61	40	67	166	140	127	94	52	106	63	77
YAL053W	106	70	91	108	111	158	196	127	148	183	117	104	104	100
YAL055W	9	9	8	46	60	88	21	15	34	24	6	9	1	1
YAL056W	58	50	37	88	94	105	193	197	287	159	124	129	52	56
YAL058W	50	24	21	32	27	41	46	50	75	43	30	33	33	44
YAL059W	11	14	21	39	29	36	45	43	47	39	33	26	10	17
YAL060W	46	42	61	80	95	147	186	153	133	135	86	92	50	48
YAL061W	27	11	16	19	10	16	201	184	163	35	24	14	25	6
YAL062W	11	11	33	110	11	12	24	16	52	31	9	16	6	20
YALCdelta2	0	0	0	0	0	0	0	1	1	0	0	1	0	0
YALWdelta1	0	0	1	1	0	0	1	0	0	0	1	0	1	0
YAR002C-A	108	88	109	99	78	91	109	86	97	120	109	107	88	85
YAR002W	84	52	60	71	58	62	95	73	190	99	90	81	47	78
YAR003W	34	23	13	46	25	33	140	78	162	77	65	60	28	25
YAR007C	107	84	41	125	119	153	153	104	139	114	86	103	82	63
YAR008W	27	8	12	57	52	69	34	29	33	46	40	30	17	12
YAR009C	14515	13591	15404	21963	18074	23718	42521	36733	37690	30550	26518	25707	25054	29619
YAR010C	6337	6549	6943	7650	7123	9008	14751	13230	13404	10389	9974	9200	11931	14097
YAR014C	52	68	115	120	104	82	223	158	225	218	175	175	71	90
YAR015W	120	92	119	152	114	137	298	205	288	171	105	134	95	122
YAR018C	28	21	28	46	31	53	61	47	81	48	27	44	22	29
YAR019C	38	37	37	45	30	45	116	72	85	49	57	38	32	45
YAR027W	39	23	17	30	19	35	57	61	53	37	45	35	50	23
YAR028W	29	14	8	19	18	21	26	27	96	55	35	25	12	42
YAR031W	10	18	14	12	17	20	48	35	30	30	42	18	18	15
YAR042W	89	95	86	146	111	112	266	226	320	159	141	155	110	156
YARCdelta3	0	0	0	4	0	0	0	0	7	0	0	3	1	3
YARCdelta4	316	238	540	440	287	483	582	574	925	673	502	451	405	611
YARCdelta5	360	347	382	253	258	343	465	337	412	399	369	263	386	480
YARCdelta8	0	0	0	1	0	1	1	0	1	0	0	1	1	0
YARWdelta6	129	73	96	154	88	186	276	232	323	320	182	195	204	301
YARWdelta7	166	87	168	227	153	230	488	317	399	404	266	257	238	485
YARWsigma1	11	12	15	45	7	32	57	28	36	59	62	32	23	14
YBL001C	27	36	58	45	36	47	103	95	92	69	68	84	47	46
YBL002W	219	222	228	1029	549	860	455	292	383	436	319	303	262	306
YBL003C	324	293	305	646	504	631	794	592	642	779	615	572	353	350
YBL004W	108	143	119	123	138	116	188	179	211	181	141	173	135	152
YBL005W	70	57	47	76	78	85	476	365	214	129	63	101	91	52
YBL005W-A	0	0	0	0	0	0	0	0	0	0	0	0	0	0
YBL005W-B	1359	1093	1481	1856	1427	1998	4381	3635	3756	2628	2179	2225	2363	2950
YBL006C	32	29	23	83	79	74	151	111	98	101	111	79	21	33
YBL007C	392	329	338	413	357	429	659	606	615	621	466	495	406	402
YBL008W	44	41	17	55	48	45	69	77	37	96	53	42	28	32
YBL009W	55	48	44	73	60	75	106	91	79	114	54	58	66	47
YBL010C	20	16	26	23	13	29	38	37	39	59	43	41	5	21
YBL011W	130	83	103	267	259	306	223	192	197	203	144	158	116	122
YBL014C	53	34	27	118	85	87	189	155	128	145	68	93	29	83
YBL015W	22	29	21	35	36	49	81	50	33	36	20	36	15	28
YBL016W	26	36	36	53	39	48	35	46	39	76	57	56	34	43
YBL017C	308	322	300	347	299	393	510	366	425	436	378	346	359	346
YBL018C	0	3	1	0	10	3	6	3	9	2	7	3	0	0
YBL019W	1	7	7	5	12	21	17	12	23	9	15	7	8	0
YBL020W	27	39	47	60	46	79	89	77	75	90	44	50	29	50
YBL021C	4	3	13	34	34	45	22	23	19	34	25	14	7	7
YBL022C	280	214	199	248	187	262	492	405	397	385	299	321	240	247
YBL023C	75	67	60	186	123	178	141	128	82	129	115	72	64	108
YBL024W	140	184	155	210	203	211	231	195	289	305	241	218	168	195
YBL025W	19	18	6	16	23	26	21	26	26	28	21	29	7	14
YBL026W	6	13	3	15	15	12	9	13	12	18	17	31	4	13
YBL028C	26	14	26	164	117	151	48	55	34	91	72	62	23	41
YBL029W	1	2	2	8	6	2	19	18	6	14	11	10	7	10
YBL030C	258	302	291	367	267	379	408	369	317	348	292	332	251	259
YBL031W	10	10	11	9	13	9	38	24	31	44	32	23	14	7
YBL032W	104	78	96	173	135	146	142	154	139	187	171	164	165	136
YBL033C	20	14	17	36	28	33	65	42	50	34	36	20	13	19
YBL034C	64	44	96	90	97	141	219	169	166	154	128	100	76	89
YBL035C	56	44	38	45	42	56	86	75	88	98	65	67	55	46
YBL037W	65	52	31	62	84	99	173	103	95	94	97	91	94	54
YBL038W	25	13	16	37	38	27	98	93	54	31	40	39	26	29
YBL039C	267	375	414	500	413	436	381	395	359	612	483	459	279	531
YBL040C	6	4	5	4	3	4	5	2	0	8	0	2	5	2
YBL041W	114	108	79	99	130	157	152	155	108	193	188	171	127	121
YBL042C	107	100	102	152	117	156	195	209	142	200	143	131	84	128
YBL043W	13	9	13	16	5	18	15	11	32	10	10	10	4	14
YBL044W	0	0	0	0	0	0	0	0	0	0	0	0	0	0
YBL045C	81	90	76	121	77	112	146	153	99	90	106	97	72	110
YBL046W	22	18	23	39	27	29	67	49	45	48	39	44	14	19
YBL047C	403	360	363	492	462	601	921	778	665	672	493	531	432	442
YBL050W	4	1	8	8	17	5	25	9	9	10	8	8	12	16
YBL051C	130	140	120	310	221	266	302	263	277	320	239	309	205	181
YBL052C	30	15	27	125	107	133	92	102	68	76	90	84	44	36
YBL054W	11	23	35	85	103	90	86	54	60	88	44	42	23	49
YBL055C	47	27	27	59	51	34	66	60	57	81	52	53	27	20
YBL056W	170	101	110	249	218	227	287	405	280	274	207	250	156	158
YBL057C	43	31	32	69	52	59	100	79	71	105	43	54	37	58
YBL058W	185	93	106	121	128	147	280	161	143	190	178	134	115	95
YBL059W	0	0	0	4	0	1	6	5	4	2	2	5	0	1
YBL060W	18	22	34	41	28	25	52	50	54	54	19	32	25	11
YBL061C	64	74	84	94	110	93	201	167	189	205	128	157	67	65
YBL063W	46	36	33	162	136	223	172	118	119	121	110	91	41	54
YBL064C	34	17	14	25	36	24	50	33	29	41	29	22	28	26
YBL066C	51	58	43	185	186	201	174	211	176	121	98	93	66	55
YBL067C	60	47	88	175	117	148	168	165	121	126	117	168	101	93
YBL068W	66	66	61	107	90	60	62	54	52	96	86	91	55	73
YBL069W	32	30	19	53	53	68	33	51	45	71	35	46	26	26
YBL072C	41	74	35	46	66	68	55	45	40	65	46	84	19	65
YBL074C	45	24	16	18	24	24	62	49	30	34	21	41	38	28
YBL076C	1175	1174	1155	1565	1294	1525	1230	1171	1086	1773	1423	1418	1155	1269
YBL078C	5	10	9	31	6	14	42	31	17	12	36	19	9	11
YBL079W	180	208	185	339	266	330	554	411	366	437	313	318	219	297
YBL080C	15	11	7	26	4	18	63	33	31	48	20	18	15	20
YBL081W	15	23	5	58	52	64	76	51	40	53	38	33	21	21
YBL082C	50	41	18	67	72	59	36	44	61	73	32	34	21	48
YBL084C	14	5	19	46	39	84	118	87	78	62	36	35	21	29
YBL085W	79	74	80	151	120	151	201	214	151	127	123	137	86	101
YBL086C	23	16	33	23	27	33	76	47	51	36	33	50	23	13
YBL087C	40	31	63	55	39	56	51	41	36	67	63	59	48	60
YBL088C	118	87	99	130	99	137	236	246	261	193	114	131	132	182
YBL089W	20	32	10	34	24	31	37	73	54	48	23	43	19	28
YBL090W	15	15	10	30	23	24	34	41	18	34	26	16	18	14
YBL091C	134	112	116	152	135	166	235	139	142	194	164	144	107	117
YBL092W	65	67	52	80	82	113	81	84	60	101	79	74	64	65
YBL093C	35	35	34	50	52	28	73	71	61	75	53	42	9	37
YBL097W	68	41	60	103	79	102	228	281	178	142	139	119	77	68
YBL098W	15	15	18	36	19	12	18	12	17	14	33	23	21	14
YBL099W	410	370	365	461	412	447	643	521	480	571	472	435	409	426
YBL100W-A	185	178	207	212	215	281	397	386	367	429	287	275	481	506
YBL100W-B	0	0	0	0	0	0	0	0	0	0	0	0	0	0
YBL101C	84	61	99	115	106	122	231	173	170	127	126	104	71	101
YBL102W	41	37	26	58	35	78	134	105	91	77	65	61	42	44
YBL103C	23	20	17	69	35	62	105	149	120	84	66	59	38	45
YBL104C	37	76	48	98	77	88	155	121	186	90	74	42	48	43
YBL105C	81	91	87	178	157	167	376	261	260	258	196	216	155	157
YBL106C	32	34	17	44	43	44	100	91	93	76	52	61	25	42
YBLCdelta7	0	0	0	1	0	0	0	1	0	0	0	0	0	0
YBLCsigma1	5	0	2	7	2	12	22	19	16	13	3	13	3	3
YBLCtau1	8	7	5	16	15	22	53	63	21	17	25	18	5	38
YBLWdelta1	0	1	0	0	1	5	0	0	1	0	0	1	3	0
YBLWdelta10	13	12	9	26	8	16	11	26	7	7	14	7	10	14
YBLWdelta2	70	45	159	104	78	102	231	145	214	99	129	116	133	137
YBLWdelta3	0	0	0	0	0	0	0	0	0	0	0	0	0	0
YBLWdelta4	3	17	9	6	6	6	9	21	30	18	22	17	10	13
YBLWdelta5	310	95	147	157	113	171	249	323	1098	304	361	276	234	486
YBLWdelta6	0	1	0	0	0	0	0	1	0	0	0	0	0	0
YBLWdelta8	0	0	0	0	0	1	1	1	2	0	3	0	0	1
YBLWdelta9	32	16	31	15	13	30	28	32	28	22	26	22	29	33
YBLWtau1	0	0	0	0	0	1	2	0	0	2	0	1	3	0
YBR001C	41	44	45	58	39	56	197	153	151	123	107	70	42	35
YBR002C	19	32	52	46	36	39	122	140	115	123	82	103	32	33
YBR003W	42	43	32	46	40	45	87	117	79	65	63	55	36	65
YBR004C	16	18	16	35	32	29	24	46	32	46	35	51	21	63
YBR005W	15	5	10	24	22	6	41	36	21	32	14	22	9	10
YBR006W	24	21	18	17	21	17	47	26	23	35	30	16	20	20
YBR007C	38	45	28	55	37	38	89	92	104	63	31	51	16	24
YBR008C	10	4	14	18	6	11	31	27	34	31	12	11	13	24
YBR009C	326	281	338	1010	661	1044	981	790	3545	980	709	768	399	593
YBR010W	372	335	605	6803	2617	5150	1636	895	1459	772	695	650	473	568
YBR011C	799	746	918	721	699	810	905	681	657	973	745	727	779	989
YBR012W-A	0	0	0	0	0	0	0	0	0	0	0	0	0	0
YBR012W-B	3188	2834	3582	5555	4114	5611	12416	10314	11583	7619	6453	6074	6660	8597
YBR013C	5	3	3	19	8	8	25	21	18	7	8	20	12	5
YBR014C	44	22	22	30	17	24	26	81	43	34	26	34	22	31
YBR015C	105	119	141	171	169	186	220	176	162	252	180	202	132	140
YBR016W	51	41	46	95	95	140	91	93	67	118	73	97	63	65
YBR017C	194	167	226	321	196	255	318	256	260	361	292	265	159	232
YBR020W	17	11	12	35	10	19	34	45	17	14	16	10	11	6
YBR021W	29	29	24	23	38	26	60	56	51	37	41	40	20	22
YBR022W	12	8	11	28	20	29	26	35	30	29	18	11	12	4
YBR023C	173	195	215	160	183	262	277	252	233	349	309	235	173	222
YBR024W	20	4	11	17	18	16	39	38	17	27	10	20	13	13
YBR025C	553	678	644	767	553	774	682	504	500	733	769	717	617	746
YBR026C	76	59	32	71	54	48	135	70	89	58	58	77	67	58
YBR028C	53	40	37	156	154	189	116	81	84	75	58	83	46	43
YBR029C	79	35	104	108	70	104	125	93	91	188	115	127	69	103
YBR030W	27	19	29	41	35	40	73	53	39	65	50	46	33	27
YBR034C	47	54	73	239	214	203	221	96	119	142	88	78	92	63
YBR035C	44	45	60	85	49	65	78	62	53	75	51	75	75	63
YBR036C	78	86	103	150	132	164	203	185	129	206	155	151	97	112
YBR037C	22	9	9	35	13	19	52	55	54	36	23	35	6	15
YBR038W	86	99	127	235	159	196	232	198	173	215	157	151	104	139
YBR039W	116	84	81	120	103	110	171	169	128	120	115	140	120	91
YBR040W	6	8	3	5	3	2	2	4	7	1	2	1	3	3
YBR041W	117	75	121	127	68	139	127	148	84	135	107	142	78	87
YBR042C	40	37	41	49	41	44	59	73	43	60	51	53	30	24
YBR043C	72	61	60	68	79	76	189	159	151	101	59	63	29	81
YBR044C	18	13	20	46	26	34	104	73	88	33	39	38	27	25
YBR046C	26	11	21	21	14	21	63	35	44	30	31	26	35	24
YBR047W	2	3	5	5	0	6	16	9	10	4	0	0	6	1
YBR048W	52	56	66	72	59	54	62	30	43	68	61	63	35	68
YBR049C	85	63	78	414	271	356	293	212	266	202	123	154	90	138
YBR052C	35	54	36	122	52	76	121	51	56	51	65	61	55	48
YBR053C	58	29	27	41	37	38	77	55	42	57	45	23	35	32
YBR054W	5	9	24	10	6	7	60	35	45	15	8	29	22	11
YBR055C	35	45	50	70	51	73	108	117	88	116	72	82	60	80
YBR056W	80	38	52	59	41	80	111	66	76	76	66	50	68	44
YBR057C	18	12	10	39	42	43	76	85	66	80	47	70	21	19
YBR058C	72	46	127	138	75	119	201	130	407	157	121	132	113	132
YBR059C	140	115	118	207	195	226	463	351	283	261	237	215	148	167
YBR060C	37	55	45	184	152	236	79	64	71	93	66	59	44	71
YBR061C	27	35	28	97	55	70	49	36	41	52	51	42	35	34
YBR062C	13	18	16	8	9	21	25	12	27	22	12	7	20	11
YBR065C	49	38	63	82	60	76	141	102	119	127	115	89	44	52
YBR066C	25	13	17	23	13	8	63	42	48	67	55	39	22	15
YBR067C	136	133	174	225	182	231	452	345	285	222	181	147	151	181
YBR068C	350	299	311	602	520	697	959	756	700	942	735	755	323	357
YBR069C	105	149	96	150	128	152	267	234	196	218	141	180	110	148
YBR070C	10	10	17	36	18	22	34	54	28	24	26	32	28	22
YBR071W	28	8	13	71	42	35	69	60	53	75	59	77	31	20
YBR072W	13	2	12	8	11	2	95	44	27	15	14	5	5	12
YBR073W	69	92	75	176	143	200	176	178	189	265	174	150	119	133
YBR074W	128	130	111	159	125	140	196	143	164	210	166	165	83	146
YBR077C	35	23	19	47	16	47	105	91	69	96	79	77	43	49
YBR078W	174	98	136	194	126	172	208	163	131	216	206	173	112	153
YBR079C	422	462	449	712	474	624	583	555	527	749	655	637	490	582
YBR080C	133	130	172	131	106	204	271	191	152	194	142	138	128	143
YBR081C	87	58	77	190	160	192	289	209	162	204	149	188	108	137
YBR082C	7	14	24	28	12	31	26	16	11	27	32	22	30	33
YBR083W	42	39	33	74	88	65	62	99	120	115	166	93	39	57
YBR084C-A	65	98	118	89	43	87	80	76	85	109	81	100	37	76
YBR084W	282	316	300	328	329	295	255	208	309	533	364	393	240	327
YBR085W	13	10	13	33	29	20	13	47	11	27	28	23	18	31
YBR086C	281	204	268	425	335	462	410	322	305	492	411	390	296	335
YBR087W	26	21	40	42	40	54	46	32	22	58	57	54	19	40
YBR088C	30	40	26	27	34	51	48	30	39	68	35	57	34	48
YBR090C	5	9	2	15	18	13	31	27	19	8	17	10	10	2
YBR091C	14	14	22	17	19	22	28	28	30	26	33	25	14	15
YBR092C	216	195	226	336	369	777	200	127	149	335	280	266	182	268
YBR093C	126	166	129	129	106	181	93	91	84	218	193	214	99	177
YBR094W	55	46	48	65	62	65	120	80	96	88	67	88	49	45
YBR095C	20	29	22	80	44	44	93	51	74	47	28	40	27	39
YBR096W	53	25	27	46	32	42	68	38	24	56	46	46	48	43
YBR097W	49	77	51	96	71	109	311	177	128	162	163	142	77	105
YBR101C	48	24	52	82	50	68	74	85	65	109	109	102	57	53
YBR102C	37	47	43	80	51	70	109	84	104	105	64	74	59	83
YBR103W	32	23	17	21	24	33	82	109	47	63	44	55	24	32
YBR104W	25	29	22	52	43	60	62	42	44	62	37	59	27	38
YBR105C	8	14	17	50	34	67	366	158	180	76	52	68	23	25
YBR106W	290	247	271	279	346	343	298	252	266	311	280	265	235	248
YBR107C	19	14	12	12	8	17	43	40	20	30	7	10	5	6
YBR109C	134	98	106	150	122	150	293	194	169	194	208	202	127	132
YBR110W	56	71	39	34	29	49	125	131	56	102	67	70	58	30
YBR111C	23	51	39	70	47	62	102	79	61	58	90	66	58	53
YBR112C	81	95	89	281	223	297	196	175	162	174	104	136	71	109
YBR114W	30	19	24	43	32	37	91	48	59	51	31	33	36	18
YBR115C	241	242	251	289	269	336	462	336	339	364	320	272	207	309
YBR119W	2	2	0	3	2	5	4	2	4	4	2	3	1	0
YBR120C	18	1	2	12	12	4	19	16	12	24	30	17	17	12
YBR121C	620	505	537	715	590	730	777	622	472	850	671	658	500	659
YBR122C	13	25	21	37	43	26	81	89	58	49	31	53	20	19
YBR123C	40	34	22	46	45	40	91	92	86	46	40	36	47	49
YBR125C	37	19	38	52	59	38	86	54	54	74	39	59	31	28
YBR126C	171	142	108	119	126	88	325	263	235	189	131	121	125	133
YBR127C	803	712	826	809	687	826	1012	899	802	1042	798	787	690	801
YBR128C	32	13	16	18	37	22	48	27	23	16	26	12	12	20
YBR129C	23	21	15	89	51	70	83	68	56	86	65	79	17	22
YBR130C	30	56	39	75	50	92	89	96	86	143	112	102	45	84
YBR131W	15	23	18	50	20	38	97	43	47	57	37	45	26	21
YBR132C	95	32	50	69	37	88	276	230	155	104	75	112	66	78
YBR133C	70	86	80	132	92	109	221	155	169	159	154	143	110	128
YBR135W	13	10	4	56	37	57	50	45	44	41	31	37	32	41
YBR136W	77	84	91	152	98	150	278	212	199	174	138	153	103	110
YBR137W	12	21	21	23	27	15	50	29	14	25	32	25	16	8
YBR138C	27	10	11	11	16	4	43	32	59	27	26	15	18	28
YBR139W	67	65	48	60	32	40	156	93	83	104	66	73	70	53
YBR141C	319	239	333	440	311	344	780	614	738	641	464	451	329	335
YBR142W	134	174	100	179	178	159	136	158	133	145	171	149	114	155
YBR143C	239	240	287	453	333	401	412	342	300	465	429	415	238	374
YBR145W	6	6	5	6	13	12	20	16	20	10	15	6	5	3
YBR146W	49	31	23	76	43	65	111	129	107	61	85	62	32	33
YBR149W	107	68	85	98	99	85	199	118	108	164	105	99	122	92
YBR150C	55	29	39	128	88	142	256	241	201	135	89	102	51	41
YBR151W	72	44	70	106	87	105	148	112	103	109	100	85	97	72
YBR152W	8	5	9	24	26	30	47	47	28	29	30	19	7	24
YBR153W	14	32	10	63	45	45	99	89	72	70	66	43	16	27
YBR154C	64	83	62	137	103	171	75	75	59	137	118	106	47	88
YBR155W	45	29	42	80	62	60	80	55	64	89	61	95	52	87
YBR156C	13	10	17	31	35	27	71	51	37	43	56	21	22	39
YBR157C	13	13	18	46	32	37	79	97	94	41	48	40	15	26
YBR158W	193	194	220	928	657	978	981	913	757	736	674	515	274	329
YBR159W	81	95	113	135	108	150	106	100	85	145	115	109	110	97
YBR160W	46	19	39	34	34	40	60	38	39	57	37	61	37	39
YBR161W	23	17	15	44	24	34	118	47	52	46	75	30	26	28
YBR162C	663	580	737	4178	2244	3102	1136	976	894	1065	809	858	600	857
YBR162W-A	30	32	24	90	57	73	96	92	90	115	81	82	73	56
YBR163W	44	17	19	192	141	243	70	53	51	74	34	57	25	51
YBR164C	87	67	56	77	52	76	82	75	62	109	54	68	99	73
YBR165W	16	11	9	22	31	24	33	57	29	29	33	31	32	20
YBR166C	43	45	32	45	44	61	51	60	62	73	27	65	36	36
YBR167C	1	4	5	7	9	28	23	18	12	22	14	13	14	11
YBR168W	28	9	13	61	29	46	58	35	35	38	38	26	19	30
YBR169C	47	27	40	37	30	40	188	93	91	58	52	75	35	64
YBR170C	33	69	48	64	41	46	128	129	106	102	76	71	71	74
YBR171W	48	31	35	53	40	52	81	47	35	69	69	55	37	29
YBR172C	81	81	88	264	80	92	236	202	171	203	147	120	109	108
YBR173C	38	36	29	54	36	58	35	63	53	101	105	80	40	33
YBR175W	17	12	11	42	25	39	60	73	29	57	47	63	48	18
YBR176W	11	20	16	31	15	31	45	23	28	29	22	29	26	25
YBR177C	60	67	49	73	68	75	108	88	68	73	92	88	65	64
YBR179C	34	30	37	48	51	60	121	118	139	101	65	51	64	44
YBR181C	23	33	28	11	15	14	19	31	14	18	22	30	16	8
YBR182C	7	6	5	19	10	4	17	9	2	4	7	7	2	2
YBR183W	13	9	11	12	7	12	49	22	32	15	16	12	6	6
YBR185C	18	16	19	20	22	28	64	46	43	48	20	32	47	33
YBR187W	105	118	108	116	91	129	72	92	103	116	111	110	60	91
YBR188C	2	10	15	14	8	10	17	12	15	11	25	12	6	7
YBR189W	170	176	145	152	126	181	150	148	222	197	155	168	122	168
YBR191W	21	11	21	21	11	12	27	8	21	19	8	7	7	7
YBR192W	20	25	25	60	36	29	55	71	64	71	63	50	41	33
YBR193C	19	15	20	46	12	23	43	70	27	111	81	49	23	31
YBR194W	1	8	2	7	5	14	26	24	13	25	20	20	7	13
YBR195C	25	22	28	29	36	16	69	36	45	52	16	27	20	12
YBR196C	2345	1970	1936	2041	1704	2001	2209	1900	1684	2739	2115	1983	1803	2056
YBR197C	20	29	14	44	34	31	41	54	54	35	55	33	24	22
YBR198C	69	77	44	153	145	189	195	161	161	163	128	107	83	130
YBR199W	90	84	76	105	125	144	206	169	169	233	162	217	128	142
YBR200W	81	37	41	53	48	77	110	111	88	88	99	97	46	82
YBR201W	12	6	13	28	9	20	31	29	18	52	25	33	14	27
YBR202W	52	76	83	265	304	265	164	151	116	111	73	83	93	68
YBR204C	29	43	17	40	28	31	60	42	48	51	32	60	31	18
YBR205W	117	79	111	124	145	172	145	128	107	236	144	148	99	129
YBR207W	58	43	38	73	43	71	160	172	137	123	83	78	51	41
YBR208C	60	95	50	65	55	108	146	116	160	65	80	76	48	55
YBR210W	27	15	24	35	17	32	22	22	33	33	42	45	33	17
YBR211C	19	16	10	67	56	47	51	23	27	27	32	53	9	11
YBR212W	77	46	36	103	77	121	168	148	132	169	104	111	67	82
YBR213W	11	14	8	17	9	16	37	25	23	19	17	12	11	18
YBR214W	48	18	23	27	31	43	117	94	73	40	42	42	45	32
YBR215W	39	24	13	40	24	56	130	48	36	47	51	56	27	33
YBR216C	66	34	62	73	34	49	171	77	70	68	70	51	33	70
YBR217W	9	5	6	21	24	20	42	19	12	24	13	10	7	8
YBR218C	527	407	509	509	434	555	587	502	537	570	496	435	423	462
YBR220C	61	37	40	73	70	72	90	87	66	107	56	78	39	56
YBR221C	390	441	353	649	378	481	646	493	716	627	544	450	479	508
YBR222C	99	93	97	88	84	100	150	113	92	110	88	99	71	80
YBR223C	6	16	24	35	20	30	26	31	55	28	25	13	12	30
YBR225W	26	21	13	53	35	69	204	141	114	90	55	73	56	38
YBR227C	34	33	21	48	43	38	83	42	27	58	52	47	18	47
YBR228W	11	4	11	25	22	20	56	24	41	23	26	16	14	12
YBR229C	90	113	119	104	86	120	162	169	136	144	145	131	79	131
YBR230C	36	17	7	21	10	27	48	35	29	30	23	26	41	13
YBR231C	3	3	15	16	10	23	55	30	39	39	21	29	7	6
YBR233W	13	12	13	50	35	58	79	35	34	59	45	52	27	20
YBR234C	153	118	122	170	165	227	261	220	188	240	163	168	114	129
YBR235W	75	72	84	100	98	124	200	179	326	120	110	95	88	76
YBR236C	29	51	61	60	44	49	141	79	74	83	82	47	34	33
YBR237W	71	29	9	58	35	82	124	114	93	102	92	81	59	63
YBR238C	44	53	38	216	119	214	183	192	141	116	104	129	54	78
YBR239C	15	24	15	20	26	32	44	43	56	34	39	18	10	14
YBR241C	24	11	10	8	10	10	32	21	20	15	12	10	5	10
YBR242W	24	3	19	22	39	19	48	30	20	33	33	23	8	25
YBR243C	44	48	50	87	52	60	61	51	37	80	75	83	81	45
YBR244W	39	26	39	43	23	48	30	51	31	58	38	67	60	56
YBR245C	145	134	117	195	190	234	241	207	199	276	169	176	143	184
YBR246W	52	43	53	53	35	60	37	59	62	83	58	62	40	59
YBR247C	20	42	46	101	49	56	90	63	59	79	71	58	34	37
YBR248C	67	60	81	114	65	107	204	147	105	131	90	87	86	107
YBR249C	216	233	251	274	213	274	181	178	203	327	282	294	236	317
YBR251W	19	19	13	15	20	27	61	52	44	59	36	44	17	24
YBR252W	45	17	54	85	63	71	54	46	36	59	50	44	33	42
YBR253W	6	9	13	26	23	21	55	50	25	34	39	35	21	22
YBR254C	12	6	9	34	21	34	32	32	12	33	32	35	20	22
YBR255W	43	12	26	34	39	31	115	52	72	75	69	55	13	35
YBR256C	59	39	32	55	55	58	126	54	55	83	60	58	41	64
YBR257W	12	6	10	13	8	5	14	30	17	22	13	8	7	11
YBR258C	3	2	1	2	15	8	19	22	6	22	9	8	2	7
YBR259W	11	20	2	41	34	35	61	60	54	42	40	32	23	29
YBR260C	41	39	38	75	57	47	89	74	75	62	50	39	39	69
YBR261C	39	35	34	51	42	51	95	37	32	79	58	49	32	38
YBR262C	33	11	6	28	35	42	93	76	50	62	88	32	20	94
YBR263W	362	232	257	309	274	351	374	304	315	327	278	231	224	319
YBR264C	16	13	5	11	21	13	42	29	25	27	16	12	12	5
YBR265W	33	49	29	167	139	124	60	69	57	99	93	73	29	46
YBR267W	39	34	33	60	40	61	117	67	67	104	53	76	31	48
YBR268W	6	18	8	27	24	14	33	40	28	40	41	24	10	19
YBR269C	12	13	17	20	13	11	50	33	25	34	38	18	24	18
YBR270C	19	5	12	19	4	16	68	37	34	22	26	10	8	10
YBR271W	33	36	41	39	32	43	46	55	132	76	78	64	29	51
YBR272C	19	30	16	45	26	44	85	93	58	61	44	45	28	40
YBR273C	37	21	36	54	35	50	59	40	42	74	67	57	53	24
YBR274W	37	17	24	40	55	45	54	48	52	54	39	47	42	45
YBR275C	75	79	94	121	107	130	216	192	155	161	157	102	104	142
YBR276C	56	67	69	151	124	125	184	248	145	137	137	127	77	94
YBR278W	12	3	10	26	20	21	28	40	27	27	25	26	4	27
YBR279W	48	54	54	126	117	172	150	140	97	139	80	110	60	74
YBR280C	21	25	13	35	22	32	71	37	56	20	24	38	15	15
YBR281C	75	26	81	69	72	87	138	93	79	102	94	113	66	45
YBR282W	9	4	20	27	16	20	47	38	39	40	26	37	13	11
YBR283C	247	277	266	334	333	363	296	303	243	397	350	351	221	310
YBR286W	627	564	537	598	575	648	766	586	568	825	616	625	550	605
YBR287W	83	60	95	130	98	98	191	107	141	165	137	149	85	76
YBR288C	57	48	33	64	62	71	108	60	93	179	110	102	53	52
YBR289W	3	7	15	12	6	14	37	30	38	54	18	25	18	7
YBR290W	20	24	26	24	33	58	103	90	90	71	76	70	25	30
YBR291C	15	16	19	43	26	58	25	40	29	30	10	42	5	31
YBR293W	21	14	20	31	24	45	90	44	52	47	29	35	25	12
YBR295W	57	32	40	66	32	48	188	173	140	53	52	51	35	32
YBR296C	88	70	72	126	123	120	145	182	155	370	147	187	66	90
YBR297W	4	9	8	18	11	35	23	25	13	14	10	17	5	13
YBR298C	16	6	5	17	13	24	17	23	10	19	14	12	7	15
YBRCdelta11	0	0	1	2	2	4	0	1	2	2	1	6	1	1
YBRCdelta14	0	0	0	0	0	0	0	0	0	0	0	0	0	0
YBRCdelta18	1	0	0	0	0	0	0	0	0	0	0	0	0	0
YBRCdelta19	3	0	1	2	0	7	24	4	1	1	2	7	0	0
YBRCtau2	0	1	1	0	0	1	0	3	1	2	0	0	0	0
YBRWdelta12	30	35	38	38	41	102	132	102	102	199	101	77	60	80
YBRWdelta13	225	216	282	475	249	290	771	698	567	564	414	346	363	435
YBRWdelta15	1	2	5	26	7	8	30	10	4	15	5	9	9	15
YBRWdelta16	0	0	1	0	0	0	0	1	1	0	1	0	1	0
YBRWdelta17	0	0	0	0	0	0	0	2	3	0	1	0	0	1
YBRWtau2	4	2	1	0	1	1	5	6	10	8	3	0	6	0
YCL001W	48	16	30	50	46	64	38	49	34	66	51	67	49	38
YCL002C	25	28	8	58	64	43	65	60	98	149	63	39	39	50
YCL004W	18	20	18	52	14	44	70	80	51	54	42	33	22	36
YCL005W	16	18	26	40	25	33	73	71	56	67	45	33	39	17
YCL008C	37	13	38	30	36	41	54	45	46	72	59	51	17	17
YCL009C	171	220	205	246	230	292	253	217	195	256	217	246	196	200
YCL010C	52	22	37	74	54	59	90	89	106	83	58	69	40	32
YCL011C	213	191	170	283	242	339	347	306	443	433	326	359	197	225
YCL014W	130	99	114	140	138	169	292	259	222	175	161	138	145	148
YCL016C	23	22	25	12	11	20	40	24	56	34	19	23	10	7
YCL017C	120	125	150	145	107	155	215	187	173	193	137	115	83	112
YCL018W	2	0	1	1	2	2	0	0	0	1	2	0	1	1
YCL019W	235	304	293	424	282	386	569	567	544	670	491	561	520	605
YCL020W	0	0	0	0	0	0	0	0	0	0	0	0	0	0
YCL024W	42	30	46	102	51	84	115	82	98	71	74	97	64	42
YCL025C	54	50	54	207	138	193	247	186	178	76	59	53	42	42
YCL027W	6	16	4	10	14	13	1	8	13	23	30	25	10	13
YCL028W	111	73	99	104	89	116	119	128	104	137	166	120	114	117
YCL029C	42	9	34	52	44	49	92	55	95	95	44	46	24	51
YCL030C	276	271	257	333	303	393	476	410	364	419	284	292	247	225
YCL031C	58	31	39	71	74	131	114	105	112	157	152	125	60	89
YCL032W	6	4	20	31	17	28	49	41	32	41	45	46	24	27
YCL033C	13	12	12	19	21	26	28	29	18	34	17	11	16	4
YCL034W	16	38	13	46	43	41	103	70	92	62	74	85	35	30
YCL035C	56	40	67	100	58	80	130	107	92	112	99	71	78	52
YCL036W	17	28	52	41	62	43	85	64	65	95	51	42	23	35
YCL037C	187	222	277	436	388	411	382	375	322	566	453	468	256	354
YCL038C	12	22	20	35	27	29	43	40	41	32	21	43	22	18
YCL039W	42	22	33	52	36	37	66	77	108	40	49	54	50	40
YCL040W	213	78	71	109	68	95	338	232	201	141	128	151	125	76
YCL043C	595	542	737	605	497	543	542	488	472	703	577	503	514	574
YCL044C	27	26	15	40	42	45	86	45	53	40	39	40	35	20
YCL045C	142	168	236	193	204	215	279	203	178	300	268	233	190	229
YCL047C	11	16	35	22	17	28	36	47	18	25	17	25	24	15
YCL049C	17	22	6	18	11	17	26	43	43	24	17	24	14	21
YCL050C	94	88	95	110	66	87	73	88	59	152	115	126	111	105
YCL051W	27	33	25	80	71	116	102	133	103	103	69	66	31	33
YCL052C	38	37	45	69	48	89	99	57	100	65	75	48	40	64
YCL054W	62	87	70	245	178	164	204	190	228	262	147	167	71	124
YCL055W	14	16	21	30	29	19	32	39	30	58	52	45	21	39
YCL056C	8	9	5	28	14	30	36	23	14	24	17	17	12	3
YCL057W	160	128	118	254	202	166	319	224	189	218	241	163	177	186
YCL059C	52	57	47	157	76	89	121	107	71	159	119	92	77	107
YCL061C	47	27	50	102	77	98	150	136	119	143	153	96	65	71
YCL063W	26	9	17	181	174	158	95	69	51	65	44	38	21	34
YCL064C	267	213	219	205	172	284	472	265	369	459	326	326	267	206
YCLCdelta1	0	0	0	0	0	0	1	1	0	0	1	0	0	0
YCLWdelta2a	1	1	1	0	0	0	1	1	2	0	0	0	2	2
YCLWdelta2b	0	0	0	0	0	0	0	0	0	0	0	0	0	2
YCLWdelta3	11	6	0	0	0	7	7	1	3	5	1	5	9	13
YCLWdelta4	1	0	0	1	4	1	1	0	3	2	4	3	0	3
YCLWdelta5	8	5	6	6	13	17	14	21	8	12	13	12	31	61
YCLWomega1	0	0	0	0	0	0	0	0	0	3	0	0	3	0
YCLWomega2	0	0	0	0	0	0	0	0	0	0	0	0	0	0
YCR002C	77	57	60	72	66	62	135	83	75	120	102	92	58	81
YCR003W	10	8	11	17	21	18	20	43	26	35	28	28	14	45
YCR004C	91	106	79	254	197	215	258	125	129	143	123	103	101	109
YCR005C	164	86	87	106	59	146	741	616	442	314	250	246	179	86
YCR007C	7	2	0	5	4	3	13	16	6	5	12	6	1	8
YCR008W	132	95	82	231	225	271	254	156	224	208	215	229	114	122
YCR009C	66	59	73	74	92	83	147	116	111	150	159	126	62	109
YCR011C	256	209	209	186	168	277	390	362	347	382	257	238	201	183
YCR012W	7216	6123	5883	5319	5264	5271	6472	5714	4811	7947	5822	5616	5567	5731
YCR015C	24	12	22	49	29	33	99	103	73	53	72	62	42	22
YCR016W	17	23	15	42	20	18	38	34	38	37	31	28	13	35
YCR017C	168	219	223	213	165	251	355	277	244	285	213	223	214	228
YCR019W	16	10	19	13	5	28	26	20	22	26	32	18	10	8
YCR020C	0	0	0	0	0	0	0	0	0	0	0	0	0	0
YCR020C-A	14	7	10	25	21	23	44	26	31	36	22	13	14	21
YCR021C	2	4	2	10	1	8	7	6	11	1	4	1	4	2
YCR023C	38	29	52	90	48	57	157	138	116	130	90	79	76	65
YCR024C	24	5	9	31	15	27	44	38	39	22	29	22	9	9
YCR024C-A	429	372	384	918	745	949	1155	993	856	936	746	744	517	490
YCR026C	40	66	58	71	63	107	269	197	147	151	133	114	62	57
YCR027C	33	25	25	23	34	31	50	44	44	63	26	26	24	19
YCR028C	74	89	82	89	88	86	139	131	93	86	91	84	49	62
YCR030C	81	103	83	97	92	123	256	146	139	167	100	86	93	129
YCR031C	18	23	17	7	16	24	8	20	11	13	22	20	13	16
YCR033W	194	151	164	289	244	284	503	391	383	295	248	260	617	236
YCR034W	122	126	115	190	140	163	154	122	85	195	149	121	111	149
YCR035C	24	39	30	92	76	74	79	77	78	89	75	86	47	56
YCR036W	24	66	26	64	34	44	108	80	88	61	66	56	50	42
YCR037C	70	52	47	103	74	100	152	161	160	112	92	69	68	56
YCR038C	6	0	3	10	22	19	42	23	39	18	14	20	8	11
YCR042C	82	83	92	153	133	120	296	227	225	247	200	248	113	132
YCR043C	40	29	49	88	63	62	70	71	61	80	78	73	17	70
YCR044C	44	34	48	42	49	46	68	46	37	59	50	35	33	57
YCR047C	22	49	38	89	55	96	153	154	98	91	95	85	32	49
YCR048W	76	88	84	120	74	88	204	188	190	125	112	111	70	68
YCR051W	43	34	60	51	56	46	62	89	55	66	51	50	30	36
YCR052W	64	75	58	106	98	101	199	110	67	129	111	94	53	92
YCR053W	405	346	354	355	370	413	341	269	239	509	431	443	320	451
YCR054C	13	11	44	17	14	19	44	26	37	45	23	19	11	25
YCR059C	148	191	165	414	273	302	317	339	335	396	294	309	123	189
YCR060W	20	16	13	30	9	16	22	23	28	30	6	12	42	11
YCR061W	54	62	85	74	43	57	153	100	80	90	78	76	63	73
YCR063W	15	11	3	16	16	22	55	23	34	30	24	18	16	30
YCR065W	79	77	63	229	207	219	377	373	332	200	213	189	99	108
YCR066W	4	2	10	36	16	27	49	19	36	26	16	26	13	10
YCR067C	161	119	143	116	117	151	220	228	174	164	181	166	131	148
YCR068W	49	35	32	34	29	43	80	73	61	51	31	29	34	41
YCR069W	72	71	75	74	52	79	271	170	106	152	115	115	71	63
YCR071C	7	4	12	40	36	23	40	33	29	41	31	41	18	15
YCR072C	37	55	75	91	95	87	128	72	72	95	85	81	36	39
YCR073C	30	37	28	75	54	81	127	96	96	77	60	43	34	53
YCR075C	8	11	16	10	9	14	29	22	24	28	14	29	5	13
YCR076C	4	7	4	92	43	75	47	22	19	32	48	33	15	16
YCR077C	153	140	131	252	221	301	286	259	254	407	290	263	128	211
YCR079W	22	14	14	59	37	54	76	64	54	26	38	31	23	10
YCR081W	45	64	60	128	102	144	249	192	209	140	144	123	103	115
YCR082W	38	39	44	136	63	126	109	139	106	154	142	123	50	85
YCR083W	2	11	5	34	11	13	30	21	16	21	22	11	4	11
YCR084C	299	261	259	518	408	515	425	353	378	530	425	386	259	283
YCR086W	5	6	1	10	7	11	14	9	11	16	12	9	5	10
YCR088W	246	240	210	265	222	212	413	304	239	311	273	223	235	229
YCR089W	71	43	49	87	45	64	101	100	92	112	77	81	62	71
YCR090C	13	21	15	49	32	31	55	43	20	68	62	46	22	31
YCR091W	27	6	20	18	18	48	118	53	54	28	29	33	22	13
YCR092C	82	55	57	73	48	61	128	114	96	138	78	75	46	41
YCR093W	202	159	180	234	201	232	513	352	339	427	302	269	254	244
YCR094W	68	35	45	63	66	83	116	88	84	92	64	97	75	45
YCR095C	10	14	9	21	17	26	66	32	19	30	13	19	21	15
YCR098C	3	1	3	1	6	7	4	0	8	2	9	3	8	1
YCR101C	33	7	15	33	31	33	23	39	125	40	17	24	18	31
YCR106W	22	31	36	36	7	42	52	63	44	47	57	33	42	33
YCRCdelta14	0	0	1	0	0	0	1	0	1	0	0	0	0	0
YCRCdelta6	0	0	5	12	1	2	6	4	9	3	4	2	6	2
YCRCdelta7	1	1	0	0	1	0	4	1	3	0	1	5	1	2
YCRCtau1	1	0	0	2	0	0	0	0	0	0	0	0	0	1
YCRWdelta10	1	2	5	2	2	3	8	3	1	4	10	3	0	1
YCRWdelta11	4	2	3	12	4	2	4	3	2	47	4	3	5	5
YCRWdelta12	1	0	0	0	0	1	2	1	0	1	0	0	1	1
YCRWdelta13	1	0	1	3	0	3	7	1	3	0	3	1	1	2
YCRWdelta8	1	0	0	0	0	0	1	0	1	0	1	0	0	0
YCRWdelta9	0	0	0	0	0	1	0	1	2	0	0	0	0	0
YCRWomega3	0	1	0	0	1	3	1	0	0	1	1	1	0	1
YDL001W	19	9	22	34	11	29	57	39	26	52	40	22	12	25
YDL002C	20	6	10	130	84	156	84	47	45	52	51	25	25	18
YDL003W	45	41	23	71	38	83	134	93	137	169	81	90	54	72
YDL004W	51	43	32	78	59	73	76	82	58	91	86	96	44	45
YDL005C	35	21	14	68	29	41	65	78	60	66	59	69	28	55
YDL006W	36	23	16	53	24	33	108	71	51	87	72	64	28	32
YDL007W	181	131	165	227	156	189	217	212	200	249	197	230	173	175
YDL008W	5	10	3	7	12	14	30	26	22	36	46	18	10	18
YDL010W	18	10	11	18	16	24	48	23	41	33	36	25	24	9
YDL012C	17	7	28	25	33	51	31	57	52	67	52	39	36	29
YDL013W	30	15	22	38	30	50	117	96	72	80	83	64	17	40
YDL014W	329	452	495	796	735	1228	480	414	434	792	627	645	401	578
YDL015C	141	128	154	194	125	158	110	147	99	218	158	168	143	153
YDL017W	2	11	1	10	8	9	12	14	24	21	26	6	15	8
YDL018C	26	6	25	30	14	28	65	34	34	24	35	33	16	20
YDL019C	60	66	46	69	83	92	188	154	209	113	105	98	91	67
YDL020C	82	76	52	150	91	137	268	362	185	172	142	149	110	98
YDL021W	8	5	13	10	5	6	50	18	14	8	4	5	5	10
YDL022W	132	103	109	115	73	128	304	237	177	196	134	153	155	184
YDL025C	47	21	134	58	39	39	127	111	80	73	62	59	37	36
YDL027C	23	23	15	30	36	31	63	65	47	53	50	39	27	16
YDL028C	60	46	37	57	54	62	158	108	152	129	68	95	56	69
YDL029W	285	159	193	237	149	220	280	230	211	308	255	262	181	220
YDL030W	20	3	31	62	47	39	58	55	33	48	46	24	19	32
YDL031W	92	79	98	234	113	150	257	193	202	241	200	161	72	124
YDL033C	22	8	23	29	32	29	76	75	75	37	23	35	13	15
YDL035C	100	58	62	118	82	177	337	245	220	214	159	163	94	113
YDL036C	26	12	18	23	43	25	26	39	20	54	21	38	17	15
YDL037C	34	50	32	108	84	82	107	248	178	38	31	17	20	39
YDL040C	167	188	208	218	207	214	347	242	207	293	254	241	226	197
YDL042C	17	14	34	43	41	48	88	43	41	61	39	35	39	48
YDL043C	6	25	28	16	23	26	42	32	24	38	31	39	12	28
YDL044C	13	11	11	25	23	32	65	69	49	41	27	34	36	20
YDL045C	16	19	10	27	10	18	41	57	20	34	38	32	33	19
YDL045W-A	24	10	7	39	27	33	80	87	67	74	70	63	29	25
YDL046W	115	74	73	215	185	265	190	177	137	202	123	140	77	102
YDL047W	52	55	57	86	86	124	131	119	82	105	127	98	55	67
YDL048C	0	4	5	0	7	6	18	11	50	11	11	4	8	1
YDL049C	6	4	3	9	4	6	17	6	18	28	11	8	11	4
YDL051W	109	121	153	178	189	159	120	136	110	208	176	203	113	182
YDL052C	114	67	104	121	83	116	152	95	97	125	85	123	90	104
YDL053C	23	21	17	68	39	48	122	68	61	55	55	66	28	36
YDL054C	26	10	18	18	14	30	24	14	17	36	18	16	31	16
YDL055C	1161	1081	1097	2464	1478	2809	1781	1246	2123	2125	1801	1474	1167	1350
YDL056W	33	59	31	65	77	78	159	106	125	133	103	82	40	64
YDL057W	4	5	5	6	8	4	15	11	9	7	7	2	8	8
YDL058W	145	117	128	252	147	196	362	297	275	280	192	210	179	192
YDL059C	9	8	2	9	8	6	12	15	4	13	5	14	5	3
YDL060W	64	97	110	123	143	139	159	120	163	205	142	160	83	142
YDL061C	23	18	18	112	64	54	61	53	58	59	45	35	35	23
YDL063C	62	73	72	92	61	110	102	138	61	162	86	98	54	83
YDL064W	0	4	8	3	6	3	0	2	3	4	9	3	3	2
YDL065C	26	22	20	46	34	29	53	46	54	73	56	57	30	35
YDL066W	204	225	236	240	246	257	371	297	256	295	223	223	242	269
YDL067C	20	32	29	80	76	78	97	95	70	73	90	78	24	43
YDL069C	5	5	9	23	9	16	30	25	23	22	75	31	28	14
YDL070W	82	97	84	1496	1011	1490	361	379	324	228	162	189	159	157
YDL072C	55	41	72	55	51	70	137	84	70	103	74	74	64	46
YDL073W	74	48	68	229	115	213	171	107	189	158	102	139	97	107
YDL074C	71	67	63	310	183	206	216	182	287	190	164	169	110	101
YDL075W	102	97	142	195	166	178	174	124	103	209	205	190	144	125
YDL076C	12	23	27	55	47	70	56	39	43	50	45	51	29	21
YDL077C	20	43	40	48	46	47	67	66	71	77	76	46	37	58
YDL078C	86	53	76	48	67	95	90	76	60	84	79	86	65	74
YDL080C	41	36	41	63	37	51	112	108	76	40	49	69	21	40
YDL081C	703	628	611	881	606	819	832	790	620	987	885	950	643	834
YDL082W	28	16	9	19	17	15	19	15	18	22	16	22	22	14
YDL083C	15	8	23	22	8	17	9	7	8	23	16	21	11	17
YDL084W	516	519	531	710	535	689	592	659	544	837	682	734	543	668
YDL086W	49	22	37	58	57	61	115	57	54	96	69	56	55	50
YDL087C	13	11	15	12	15	18	30	39	43	40	13	18	20	10
YDL088C	19	32	30	64	54	65	99	108	94	60	84	77	24	47
YDL089W	43	21	17	35	27	38	39	43	29	39	38	36	32	29
YDL090C	45	39	45	74	57	54	130	92	77	117	65	75	57	44
YDL092W	25	25	11	49	38	49	49	66	43	67	59	62	36	63
YDL093W	64	48	33	53	62	80	113	77	71	98	64	76	57	54
YDL095W	393	397	415	373	313	343	425	427	388	465	408	400	368	419
YDL097C	117	108	108	118	119	192	311	199	161	195	191	185	152	130
YDL098C	16	4	9	14	17	54	41	39	48	28	35	14	33	28
YDL099W	20	17	10	29	25	34	62	39	20	47	43	35	27	35
YDL100C	226	209	252	228	196	280	253	213	296	350	285	296	224	247
YDL101C	32	15	14	22	24	35	49	45	33	38	42	30	31	26
YDL102W	81	75	78	108	63	116	177	148	125	142	107	100	79	107
YDL103C	76	59	56	59	97	97	110	79	75	113	108	90	75	94
YDL104C	7	3	6	6	6	20	24	22	13	28	22	21	7	22
YDL105W	10	3	1	18	8	19	53	19	18	28	20	24	11	8
YDL106C	32	28	25	32	42	34	91	84	57	93	62	71	56	50
YDL107W	1	4	1	10	3	10	21	33	20	27	18	17	15	40
YDL108W	19	10	10	31	33	18	42	37	24	69	18	21	23	26
YDL109C	20	21	19	23	14	50	50	30	51	54	49	47	16	31
YDL110C	24	11	5	29	21	25	74	72	32	32	18	23	23	17
YDL111C	41	30	32	34	36	56	56	49	65	110	86	59	57	30
YDL112W	191	208	207	298	258	307	325	324	367	398	346	299	197	258
YDL113C	35	18	25	49	27	37	191	106	81	69	74	76	24	50
YDL115C	29	19	21	37	45	32	80	68	69	62	51	39	23	44
YDL116W	80	75	74	108	75	103	221	158	180	173	146	157	89	107
YDL117W	68	68	61	118	83	138	266	279	169	179	140	132	71	89
YDL119C	6	7	6	22	8	20	16	26	22	19	22	15	13	10
YDL120W	20	15	10	38	45	68	49	33	44	61	36	51	35	36
YDL121C	32	18	45	48	31	58	40	53	20	66	61	41	48	34
YDL122W	101	141	102	213	170	167	279	272	186	334	203	171	149	154
YDL123W	19	33	22	43	21	36	87	53	33	55	41	43	22	23
YDL124W	80	75	94	121	100	116	257	220	131	137	121	128	93	58
YDL125C	15	11	3	15	6	19	26	29	18	23	24	27	14	18
YDL126C	1182	958	1054	1117	938	1115	1626	1231	1158	1498	978	1136	928	1077
YDL127W	25	11	23	19	21	21	96	50	51	33	56	54	23	13
YDL128W	85	63	83	111	58	115	141	105	135	115	104	107	91	98
YDL129W	19	7	12	55	52	35	41	41	48	41	30	35	17	4
YDL130W	113	119	133	180	138	129	147	118	125	211	149	236	107	150
YDL131W	195	175	147	193	169	213	188	239	180	228	158	189	199	225
YDL132W	103	97	100	145	106	161	276	235	225	217	191	224	120	172
YDL133C-A	990	791	922	1847	1374	1812	2547	1772	2001	1885	1550	1739	1608	1655
YDL133W	36	41	17	56	39	41	181	126	131	80	84	65	29	34
YDL135C	70	52	25	82	79	73	80	80	61	78	86	81	59	89
YDL136W	7	3	7	4	5	10	10	2	16	10	5	7	12	5
YDL137W	205	135	177	268	215	250	500	297	275	257	217	212	164	153
YDL138W	34	20	36	30	52	47	141	103	71	74	73	57	37	31
YDL141W	62	81	70	217	172	174	144	119	83	141	84	115	68	92
YDL142C	21	14	3	14	20	12	37	31	20	31	32	36	14	8
YDL143W	263	216	188	251	272	294	250	241	220	356	342	286	183	231
YDL144C	34	22	39	40	49	43	53	52	56	31	50	40	23	40
YDL145C	570	605	615	786	727	782	991	887	928	1076	894	824	678	767
YDL147W	155	126	128	206	123	165	385	278	217	283	239	244	205	220
YDL148C	74	76	95	174	124	183	174	128	161	188	180	180	79	134
YDL149W	16	19	19	43	27	30	137	84	75	42	38	22	52	29
YDL150W	40	29	36	57	42	50	56	52	49	109	72	67	30	34
YDL153C	60	71	66	139	151	110	171	121	123	200	124	148	81	114
YDL155W	42	38	55	89	48	86	193	144	160	153	92	82	43	77
YDL156W	32	13	37	27	12	42	57	42	44	41	26	40	23	38
YDL157C	24	14	47	103	41	62	78	67	38	58	66	43	21	127
YDL159W	14	37	37	145	109	160	127	78	70	61	30	38	14	14
YDL160C	237	252	234	980	610	862	633	414	513	296	210	253	263	323
YDL161W	57	53	44	112	78	85	140	120	115	126	119	96	57	68
YDL164C	64	79	68	53	75	105	110	81	110	106	124	87	62	54
YDL165W	15	39	26	21	37	27	25	34	41	49	55	35	22	18
YDL166C	19	30	18	25	41	32	72	52	60	61	45	35	21	38
YDL167C	118	88	99	284	216	283	226	183	148	279	217	152	92	144
YDL168W	79	55	61	112	52	65	49	58	56	91	61	57	111	75
YDL170W	16	8	20	37	11	34	70	58	47	52	36	35	21	17
YDL171C	977	1003	951	1226	1136	1447	1053	1010	976	1302	956	1012	885	1226
YDL173W	28	54	38	68	52	101	121	85	95	109	101	62	67	43
YDL174C	57	52	56	102	81	95	159	162	227	109	85	105	69	65
YDL175C	21	12	10	17	3	18	50	54	22	34	35	31	11	20
YDL176W	2	40	16	46	35	28	92	75	74	58	62	65	28	38
YDL177C	1	1	2	14	19	25	27	25	14	12	14	13	6	1
YDL178W	60	60	59	58	59	49	104	91	74	82	52	60	60	64
YDL179W	17	16	11	57	29	34	56	47	36	29	38	32	26	27
YDL180W	33	15	26	60	43	80	80	73	57	65	54	50	41	31
YDL181W	5	7	7	1	4	3	14	23	13	18	10	14	8	16
YDL183C	2	6	2	7	8	9	38	13	125	11	10	21	3	7
YDL184C	1848	1583	2022	3959	2623	3187	4687	3242	4924	3306	3047	3210	2700	3293
YDL185W	1628	1684	1772	1629	1463	1640	2200	1800	1736	2126	1738	1569	1459	1503
YDL188C	116	100	80	119	109	117	164	125	141	193	150	139	92	98
YDL189W	30	23	41	53	46	95	108	125	85	133	102	112	53	54
YDL190C	151	131	140	171	129	156	224	268	262	233	156	138	112	170
YDL191W	1	4	10	2	0	6	8	12	2	6	1	4	1	3
YDL192W	486	388	457	645	498	547	2798	563	398	834	695	592	467	566
YDL193W	46	36	37	45	40	37	69	62	43	84	42	51	36	47
YDL195W	318	273	265	288	276	338	356	325	372	436	340	350	263	294
YDL197C	15	18	15	39	19	58	153	77	69	60	51	42	33	24
YDL198C	31	34	33	87	78	64	68	54	51	50	47	36	56	54
YDL199C	17	20	13	26	20	24	71	57	30	40	22	17	16	21
YDL201W	44	48	51	101	104	134	75	82	62	120	72	106	73	91
YDL202W	23	21	11	43	22	38	62	88	37	62	38	55	30	20
YDL203C	54	21	34	85	92	105	118	102	112	89	84	61	18	61
YDL204W	8	12	8	23	20	19	34	43	28	25	15	17	8	12
YDL205C	85	92	70	149	102	132	153	114	119	129	109	128	57	81
YDL206W	7	4	2	14	20	23	45	36	19	22	14	6	12	16
YDL207W	38	28	43	45	39	80	141	105	112	120	107	96	38	59
YDL208W	62	89	45	176	125	173	122	114	81	149	149	135	106	61
YDL209C	24	7	17	46	10	24	80	65	33	50	27	49	10	21
YDL211C	3	16	12	32	25	46	43	36	48	39	35	32	6	10
YDL212W	117	99	154	121	71	130	120	142	110	148	124	150	105	92
YDL213C	13	18	18	37	31	51	73	41	34	66	54	45	38	19
YDL215C	3	2	8	12	3	3	61	54	33	14	10	17	7	15
YDL216C	15	13	17	49	13	26	44	39	50	39	30	19	25	16
YDL217C	29	24	31	49	40	53	85	91	82	100	67	62	20	40
YDL219W	0	1	2	1	0	3	14	1	2	5	12	2	0	4
YDL220C	17	23	34	36	47	53	68	65	60	65	62	47	30	56
YDL224C	52	77	81	157	106	149	323	274	229	214	193	204	98	116
YDL225W	42	46	45	75	57	94	109	81	98	77	70	65	49	75
YDL226C	147	81	127	176	125	189	194	164	125	139	130	134	102	115
YDL227C	69	70	87	681	403	506	213	199	153	174	124	126	86	81
YDL230W	12	7	8	22	13	17	43	37	28	38	36	29	12	11
YDL231C	46	26	36	46	51	58	85	72	80	77	48	50	46	46
YDL232W	10	13	15	70	58	73	71	68	35	90	50	46	36	47
YDL233W	20	12	19	17	21	28	59	62	74	51	39	39	14	18
YDL234C	13	27	22	27	34	49	128	85	116	76	47	55	39	30
YDL235C	35	41	51	96	56	62	116	75	79	126	83	75	58	86
YDL236W	124	83	91	140	154	157	114	128	171	169	130	118	112	86
YDL237W	64	54	63	52	52	55	103	87	69	86	61	71	38	74
YDL238C	45	18	29	37	35	34	122	83	77	62	33	36	25	47
YDL240W	51	45	55	1159	945	1239	324	250	225	201	228	151	80	119
YDL241W	57	34	142	220	30	108	151	62	533	92	68	61	82	190
YDLCdelta1	0	3	0	12	4	13	3	3	3	5	6	1	3	5
YDLWtau1	9	0	4	7	1	6	7	13	6	9	0	6	0	11
YDR001C	94	78	61	78	61	75	317	208	197	132	102	78	103	76
YDR002W	239	296	247	327	226	340	361	345	264	412	361	286	247	403
YDR003W	29	17	12	36	31	49	78	64	44	36	30	26	22	28
YDR004W	15	16	11	41	63	49	56	48	31	39	46	33	23	38
YDR005C	4	3	1	7	5	7	11	12	9	3	7	9	4	9
YDR006C	69	53	49	138	95	97	335	268	270	143	187	122	70	74
YDR007W	38	33	39	85	52	86	151	102	109	75	51	59	28	53
YDR011W	502	514	379	464	368	515	1241	1138	862	779	604	625	504	549
YDR013W	18	1	4	9	19	13	17	23	29	31	24	35	20	14
YDR014W	10	18	9	10	18	22	42	35	38	19	28	25	9	12
YDR016C	10	13	6	206	63	77	53	30	25	22	19	20	20	5
YDR017C	80	92	73	154	119	135	337	286	199	192	164	171	82	122
YDR020C	13	10	26	37	49	36	53	54	48	77	39	46	28	31
YDR021W	4	15	12	19	27	18	31	26	17	30	14	13	7	20
YDR022C	2	1	10	8	9	9	35	24	17	14	12	13	5	12
YDR023W	532	484	429	640	406	506	444	382	396	640	511	574	549	613
YDR025W	44	47	35	77	56	71	62	50	43	81	84	75	44	49
YDR026C	13	32	36	65	61	57	132	82	89	85	111	71	43	51
YDR027C	53	43	89	100	88	116	133	174	102	131	97	117	55	101
YDR028C	163	146	179	260	234	272	560	455	391	413	324	287	208	243
YDR030C	1	15	12	2	12	9	39	27	24	11	16	16	5	14
YDR031W	0	1	2	2	0	7	18	9	20	9	10	5	2	4
YDR032C	80	62	82	77	90	83	153	104	116	139	82	71	69	65
YDR033W	810	869	1164	4454	1703	2070	3249	1913	1787	1438	1135	1072	867	1248
YDR034C	32	54	100	283	216	253	248	185	181	135	105	107	52	104
YDR034C-C	0	0	0	0	0	0	0	0	0	0	0	0	0	0
YDR034C-D	15	26	28	45	33	39	54	58	59	67	49	50	41	51
YDR035W	114	95	108	457	272	391	235	175	136	184	181	160	99	112
YDR036C	52	77	54	65	86	65	82	88	79	76	52	70	57	51
YDR037W	670	657	696	847	792	915	675	575	538	847	649	701	737	847
YDR041W	9	10	21	43	32	57	106	77	60	31	54	34	28	94
YDR042C	19	14	3	10	11	21	17	15	41	28	9	14	10	20
YDR043C	17	6	9	14	5	19	51	30	24	26	12	21	17	0
YDR044W	108	90	49	119	70	88	95	100	117	86	89	71	56	74
YDR045C	18	17	18	47	35	50	58	48	20	67	77	28	22	32
YDR046C	131	102	79	145	113	152	322	196	189	200	155	176	124	117
YDR047W	81	24	44	104	80	93	162	106	136	82	111	75	75	87
YDR049W	21	18	20	32	29	45	61	92	65	51	46	48	29	28
YDR050C	2550	2249	2236	2102	1888	2082	2067	1992	1580	2739	2167	2168	1747	1986
YDR051C	29	32	29	63	41	62	47	62	80	105	86	86	45	31
YDR052C	39	34	28	104	63	80	159	144	133	112	90	118	51	84
YDR054C	55	36	57	81	61	110	151	111	138	184	89	128	94	77
YDR055W	71	44	90	74	68	96	187	135	111	162	117	100	75	47
YDR056C	57	39	52	64	58	74	107	79	80	123	94	88	53	59
YDR057W	30	20	25	25	29	26	36	56	37	49	31	44	38	23
YDR058C	4	0	1	0	1	0	10	5	7	3	6	1	4	1
YDR059C	1	0	9	0	2	1	2	4	6	1	0	2	2	1
YDR060W	278	302	294	536	339	388	606	430	364	435	337	361	233	502
YDR061W	41	29	26	60	47	45	138	120	90	79	66	46	32	39
YDR062W	232	183	243	288	213	252	289	255	241	394	318	314	219	381
YDR063W	32	23	10	40	30	41	46	44	50	67	35	31	23	41
YDR064W	91	96	99	160	157	175	171	124	116	162	98	165	59	78
YDR065W	8	6	4	24	11	8	22	26	27	19	7	17	16	10
YDR067C	5	2	16	16	2	4	20	9	4	13	18	9	6	4
YDR068W	33	25	11	40	32	18	46	51	37	57	78	71	43	49
YDR069C	46	35	44	53	55	63	107	96	89	88	64	63	52	30
YDR070C	0	0	2	2	1	1	15	7	14	5	0	0	0	2
YDR071C	76	47	65	65	67	73	190	76	85	144	121	136	56	127
YDR072C	45	69	58	113	53	127	231	321	233	155	113	133	56	98
YDR073W	18	23	24	108	28	55	76	74	123	55	61	34	26	52
YDR074W	201	92	109	140	108	158	466	287	289	175	151	159	154	137
YDR075W	2	22	34	123	56	115	35	29	102	28	33	33	12	11
YDR076W	12	23	15	27	23	31	67	44	36	37	30	28	15	47
YDR077W	970	623	976	1619	1192	1574	2173	1427	1446	1993	1579	1421	881	695
YDR078C	4	11	3	31	8	33	65	27	28	27	13	16	14	16
YDR079W	3	1	14	30	8	9	18	13	15	7	23	14	15	11
YDR080W	64	21	48	57	45	54	159	128	79	101	75	59	41	37
YDR081C	35	50	70	73	50	69	131	106	144	90	78	77	44	46
YDR082W	19	20	23	25	33	38	67	59	53	45	17	34	20	13
YDR083W	17	35	37	90	63	38	62	56	55	60	51	37	35	62
YDR084C	23	2	10	25	6	22	12	25	7	13	19	15	11	18
YDR085C	3	6	7	15	11	20	44	19	28	17	20	27	5	10
YDR086C	78	102	88	225	140	215	236	143	127	181	193	160	146	207
YDR087C	42	38	67	116	75	57	70	58	68	138	88	80	47	69
YDR088C	26	22	28	24	30	37	93	41	55	44	48	26	48	47
YDR089W	60	49	59	91	57	70	240	154	137	129	120	93	70	45
YDR090C	29	7	8	44	23	40	80	71	55	36	30	47	7	26
YDR091C	186	193	181	383	315	389	205	264	213	450	324	353	203	321
YDR092W	2	9	5	7	9	1	5	11	4	25	5	13	5	0
YDR093W	235	238	272	343	227	343	436	392	303	434	302	338	253	254
YDR097C	111	96	89	151	144	169	207	198	215	231	159	144	154	94
YDR098C	84	64	46	55	39	40	62	79	79	82	73	58	54	81
YDR098C-A	7	8	19	9	8	25	18	24	29	20	21	13	24	19
YDR098C-B	0	0	0	0	0	0	0	0	0	0	0	0	0	0
YDR099W	209	250	163	330	280	399	407	337	287	473	462	330	278	302
YDR100W	29	32	15	59	11	32	40	47	32	34	37	16	28	28
YDR101C	119	114	99	189	173	163	141	100	145	250	146	202	81	134
YDR103W	73	62	76	97	66	85	157	187	166	96	105	65	94	69
YDR104C	31	22	37	61	45	39	188	175	133	80	66	79	45	68
YDR105C	36	41	20	39	47	52	101	67	87	97	62	60	46	47
YDR107C	65	49	48	46	47	57	115	82	56	68	68	55	32	33
YDR108W	29	18	16	47	23	27	59	82	49	65	47	50	36	29
YDR109C	30	17	16	45	19	45	104	81	49	52	38	58	28	31
YDR110W	41	29	29	105	92	166	112	114	74	90	60	59	26	38
YDR111C	53	29	37	74	59	69	36	45	53	45	51	39	30	30
YDR113C	9	7	9	25	26	31	68	36	40	35	47	31	20	23
YDR115W	15	19	10	113	10	27	48	63	46	52	37	42	25	21
YDR116C	10	8	29	20	33	33	52	78	28	40	52	29	20	18
YDR117C	66	59	34	54	48	75	133	82	56	87	73	75	36	54
YDR118W	19	27	48	24	27	31	88	50	41	46	29	60	43	32
YDR119W	173	142	117	194	167	185	287	242	249	344	212	269	145	192
YDR120C	85	93	73	199	178	201	167	149	156	145	162	124	86	135
YDR121W	20	14	13	9	15	32	22	38	25	48	43	29	20	19
YDR122W	73	72	80	128	93	167	358	293	285	204	183	206	167	115
YDR123C	11	14	11	39	33	36	79	89	69	70	56	48	14	20
YDR125C	19	10	14	15	17	16	50	35	44	26	14	14	21	10
YDR126W	8	5	10	8	14	9	36	31	21	18	12	16	9	12
YDR127W	674	480	622	615	539	667	1242	909	1127	867	558	608	518	539
YDR128W	57	35	25	71	34	61	146	136	107	84	79	56	58	72
YDR129C	0	2	5	3	1	7	4	1	11	2	6	8	0	10
YDR130C	28	16	17	31	28	30	84	79	30	27	34	44	25	25
YDR131C	12	12	5	15	8	17	22	17	25	22	23	28	17	9
YDR132C	11	1	9	7	9	11	18	22	19	33	18	25	12	10
YDR134C	278	131	267	1018	424	689	608	457	489	440	483	422	230	194
YDR135C	383	395	381	328	310	343	546	507	713	514	401	402	396	423
YDR137W	45	32	27	48	42	52	109	97	71	76	75	62	58	51
YDR138W	42	53	48	62	84	51	110	124	129	110	80	73	71	76
YDR139C	8	12	6	7	22	22	17	14	17	19	18	11	12	5
YDR140W	18	14	20	27	24	28	40	27	47	31	44	19	16	10
YDR141C	123	103	74	119	98	121	285	187	183	192	166	188	140	125
YDR142C	15	10	26	15	6	23	98	59	33	55	23	42	12	24
YDR143C	28	70	37	84	93	133	106	118	75	117	109	75	71	75
YDR144C	119	110	101	117	152	135	141	132	110	168	148	127	108	150
YDR145W	44	39	77	144	111	142	165	182	115	177	127	153	72	75
YDR146C	68	46	42	67	60	81	168	126	89	115	104	87	44	57
YDR147W	15	15	22	31	36	37	94	60	52	46	60	44	21	29
YDR148C	77	37	58	38	46	53	59	75	55	48	43	43	64	71
YDR150W	40	55	44	83	39	82	148	162	296	151	129	124	87	88
YDR151C	34	31	25	50	27	38	125	57	76	82	50	60	55	30
YDR152W	46	47	44	100	108	95	108	133	129	141	106	119	57	63
YDR153C	36	37	25	53	40	50	71	84	88	95	87	51	46	51
YDR155C	730	641	654	938	766	849	857	721	586	821	605	600	771	767
YDR156W	46	28	41	56	51	43	42	56	44	88	77	87	24	38
YDR158W	387	344	327	485	388	421	392	288	234	449	411	419	363	387
YDR159W	68	68	54	140	124	139	250	166	147	157	113	86	49	105
YDR160W	60	33	52	104	60	105	96	94	112	73	40	51	19	23
YDR161W	79	84	85	91	89	100	117	85	75	121	80	97	89	68
YDR162C	17	12	16	21	14	19	46	26	31	27	26	23	11	31
YDR163W	2	1	14	12	14	6	20	15	14	26	12	20	0	5
YDR164C	67	58	51	83	38	61	129	90	144	98	84	63	28	49
YDR165W	57	65	69	130	92	110	87	77	80	126	113	120	58	99
YDR166C	39	49	37	102	87	93	128	125	94	128	114	86	45	78
YDR167W	25	8	23	27	35	41	31	34	36	74	65	75	31	47
YDR168W	83	66	48	104	104	102	94	79	116	92	74	66	91	75
YDR169C	71	54	51	101	97	91	167	164	130	86	79	85	76	47
YDR170C	53	30	41	83	81	83	136	122	120	137	99	96	63	71
YDR170W-A	28	15	14	27	11	36	92	80	51	37	41	37	26	42
YDR171W	68	19	14	25	22	29	113	97	55	51	65	47	74	38
YDR172W	326	369	356	570	416	556	597	472	352	674	562	570	343	446
YDR173C	6	15	22	34	16	16	45	14	30	24	22	17	11	11
YDR174W	102	99	90	510	366	525	148	122	154	163	169	121	116	131
YDR175C	19	14	23	33	27	39	60	78	70	50	39	57	32	23
YDR176W	34	40	55	70	72	68	207	173	119	124	101	128	58	74
YDR177W	45	39	67	49	47	49	93	68	71	64	79	62	60	57
YDR178W	41	30	50	38	52	42	57	54	34	64	59	46	43	21
YDR179C	5	1	1	14	4	7	25	7	18	14	8	12	13	5
YDR179W-A	6	10	2	22	26	25	20	24	12	23	11	30	8	23
YDR180W	75	64	82	129	80	100	168	146	105	158	126	126	86	90
YDR181C	23	18	14	33	18	27	73	47	31	42	24	28	13	21
YDR182W	61	77	71	101	65	79	139	86	194	116	123	89	56	57
YDR183W	1	4	7	10	5	18	22	19	7	43	21	17	9	24
YDR184C	29	20	45	55	54	70	92	53	42	56	81	65	38	22
YDR185C	3	3	1	6	0	4	11	19	7	6	12	5	4	2
YDR186C	129	86	108	200	144	203	442	338	329	269	182	202	122	106
YDR188W	249	312	232	541	357	413	668	392	377	416	381	374	224	293
YDR189W	100	104	83	163	117	146	225	141	136	181	115	157	75	170
YDR190C	117	161	142	247	198	272	224	182	185	250	178	188	110	157
YDR191W	9	3	4	12	11	14	42	36	22	17	13	19	7	6
YDR192C	20	10	16	23	16	25	43	51	34	33	33	26	15	12
YDR194C	101	91	87	258	146	218	408	348	226	287	221	207	150	144
YDR195W	18	24	14	79	48	64	79	86	51	49	43	38	40	30
YDR196C	24	14	24	28	18	25	74	43	29	53	62	34	19	19
YDR197W	19	19	13	22	20	26	61	91	35	44	45	36	15	28
YDR198C	16	10	32	54	24	27	37	39	48	32	29	25	17	16
YDR200C	16	9	13	54	55	56	92	80	72	74	68	77	34	23
YDR201W	12	16	17	67	67	73	29	46	22	34	16	27	43	30
YDR202C	24	20	16	49	17	26	63	43	36	40	38	35	28	25
YDR204W	30	30	22	32	21	21	44	49	46	48	53	41	32	24
YDR205W	34	33	29	71	39	39	114	69	114	51	55	68	37	28
YDR206W	107	72	55	123	96	118	223	149	274	131	87	84	103	100
YDR207C	24	32	30	75	58	86	87	80	74	82	64	71	25	34
YDR208W	82	83	74	154	99	112	340	298	250	200	145	165	91	98
YDR210C-C	9	12	5	22	7	12	13	32	13	12	21	13	15	24
YDR210C-D	0	0	0	0	0	0	0	0	0	0	0	0	0	0
YDR210W	26	52	45	110	95	140	140	95	109	114	91	101	66	70
YDR210W-A	0	0	0	0	0	0	0	0	0	0	0	0	0	0
YDR210W-B	44	26	54	39	50	77	94	114	81	99	51	50	97	89
YDR211W	163	175	232	244	195	262	412	304	232	390	293	321	191	189
YDR212W	222	224	260	223	263	288	213	180	163	409	305	290	216	283
YDR213W	52	51	58	115	134	157	162	132	138	154	85	81	54	69
YDR214W	80	83	169	108	109	141	139	139	108	176	136	135	96	123
YDR217C	75	41	27	89	79	91	208	152	191	122	87	104	95	105
YDR219C	19	22	11	57	26	28	115	95	83	75	45	67	35	24
YDR221W	70	55	68	101	76	84	182	133	107	119	108	107	57	67
YDR222W	9	13	8	34	38	44	40	31	28	44	22	37	10	16
YDR224C	130	136	192	836	674	830	597	487	362	545	345	405	231	282
YDR225W	131	168	199	1298	751	964	587	406	438	465	347	347	264	254
YDR226W	401	295	388	563	415	487	347	376	353	549	436	412	364	336
YDR227W	53	41	49	105	94	98	232	191	147	130	95	112	88	102
YDR228C	37	38	19	63	41	62	79	86	107	91	70	70	45	60
YDR229W	20	33	19	58	24	34	109	58	61	50	52	42	27	21
YDR231C	29	20	16	18	9	14	35	32	31	22	12	18	7	15
YDR232W	142	201	117	345	351	359	275	288	272	297	222	197	145	194
YDR233C	320	304	359	371	290	372	304	265	257	453	374	340	361	458
YDR235W	23	23	14	32	21	41	65	60	63	46	43	35	35	24
YDR236C	9	14	19	27	14	16	52	26	21	39	28	17	20	17
YDR237W	26	17	16	52	18	37	71	61	63	52	56	33	45	27
YDR238C	422	388	402	477	434	563	784	604	555	634	537	515	437	508
YDR239C	36	19	26	50	26	32	78	72	78	54	48	29	31	22
YDR240C	7	18	19	43	23	28	59	35	42	34	35	42	16	22
YDR242W	20	1	8	12	16	12	49	58	48	25	16	24	13	25
YDR243C	22	18	23	27	18	27	56	39	47	33	28	29	24	40
YDR244W	19	30	17	28	32	23	101	88	57	56	59	35	29	25
YDR245W	88	80	129	110	128	148	199	155	166	209	166	138	97	134
YDR246W	12	9	8	29	20	24	23	31	21	24	37	36	18	12
YDR247W	27	22	55	98	88	135	144	73	71	86	65	66	20	43
YDR248C	16	13	5	6	11	12	16	25	17	18	15	15	25	10
YDR249C	12	14	12	28	13	26	112	47	29	44	24	44	11	24
YDR251W	122	92	65	188	107	166	297	186	159	216	141	187	164	107
YDR252W	11	3	5	11	12	21	27	24	19	16	17	18	3	5
YDR253C	4	0	8	17	3	6	7	5	11	12	9	7	4	7
YDR254W	15	13	14	25	29	20	89	49	44	53	42	36	36	26
YDR255C	9	17	25	35	21	42	90	71	33	33	14	34	30	15
YDR256C	5	3	9	3	0	9	9	8	6	15	11	7	0	4
YDR257C	28	45	40	61	66	59	126	77	61	70	80	86	59	56
YDR258C	94	73	69	87	73	77	414	210	192	126	74	109	113	80
YDR260C	11	13	21	34	36	27	44	37	39	46	36	34	19	28
YDR261C	65	44	63	78	85	72	108	96	73	89	87	83	52	75
YDR261C-C	0	0	0	0	0	0	0	0	0	0	0	0	0	0
YDR261C-D	0	0	0	0	0	0	0	0	0	0	0	0	0	0
YDR261W-A	0	0	0	0	0	0	0	0	0	0	0	0	0	0
YDR261W-B	95	82	103	131	124	154	282	231	326	196	149	154	141	143
YDR262W	20	31	41	101	46	53	190	108	81	83	86	64	43	54
YDR263C	9	13	18	42	24	28	55	44	56	48	27	36	8	20
YDR264C	320	188	247	304	222	308	644	612	606	397	305	256	265	211
YDR265W	28	9	18	51	31	50	132	118	82	58	69	56	26	31
YDR266C	64	43	87	73	77	78	79	100	89	95	92	107	51	81
YDR267C	38	32	29	74	61	90	101	70	55	87	34	42	34	20
YDR268W	12	3	15	14	24	34	62	49	20	35	27	15	23	19
YDR270W	80	33	56	117	85	87	445	552	314	152	114	110	86	68
YDR272W	69	36	64	41	51	35	82	62	59	65	55	60	48	50
YDR273W	2	0	1	6	6	9	47	16	5	9	14	5	10	3
YDR276C	73	119	100	415	331	431	411	291	328	311	225	237	183	179
YDR277C	11	2	7	84	97	84	50	15	27	12	14	23	9	7
YDR279W	11	21	20	45	31	28	31	24	36	31	34	32	39	25
YDR280W	72	34	59	139	115	146	106	85	58	83	84	93	30	65
YDR281C	20	9	8	157	113	134	147	131	196	103	69	66	27	39
YDR282C	7	10	33	46	12	23	65	30	39	21	26	28	10	16
YDR283C	6	10	22	7	13	13	23	7	14	11	22	16	18	17
YDR284C	60	54	37	93	36	79	138	65	49	76	88	56	40	69
YDR286C	10	2	2	10	11	10	17	13	16	12	10	17	4	17
YDR287W	6	6	7	16	8	22	37	13	19	19	33	22	22	18
YDR288W	18	14	21	57	26	40	95	74	88	63	31	38	19	19
YDR289C	27	16	24	17	22	28	83	45	37	70	41	59	34	19
YDR291W	58	31	58	81	33	75	74	174	96	75	88	79	58	48
YDR292C	133	92	83	144	71	119	179	178	120	146	157	136	113	104
YDR294C	97	70	101	105	76	81	89	83	63	165	102	110	93	111
YDR295C	11	24	15	30	27	29	65	75	49	55	73	42	36	49
YDR296W	30	17	31	21	23	23	76	61	61	63	61	60	19	15
YDR297W	77	74	80	167	114	163	76	85	114	126	299	99	83	102
YDR298C	71	76	49	115	77	91	117	121	99	126	128	86	120	176
YDR299W	2	6	20	27	16	15	39	28	28	56	19	37	15	31
YDR300C	69	78	53	101	94	80	92	111	81	164	97	144	94	105
YDR301W	129	113	102	489	332	495	326	217	265	231	161	180	126	131
YDR302W	12	5	20	20	12	8	30	27	14	26	55	31	23	19
YDR303C	94	102	66	269	179	269	339	231	208	174	177	194	118	135
YDR304C	159	153	160	153	90	130	142	113	125	203	154	144	136	168
YDR305C	5	6	2	14	6	7	7	15	19	6	7	10	5	13
YDR306C	35	19	23	45	14	43	81	106	71	56	47	34	22	18
YDR307W	42	31	41	26	39	42	63	67	43	63	30	36	25	44
YDR308C	18	9	10	35	15	28	37	53	18	42	12	27	11	22
YDR309C	103	39	37	188	103	155	303	205	175	253	162	153	71	75
YDR310C	105	105	109	198	131	216	261	229	202	220	161	178	93	116
YDR311W	15	30	39	82	36	70	94	85	88	134	79	84	35	47
YDR312W	29	32	31	66	28	53	62	70	61	82	65	70	45	35
YDR313C	16	16	11	47	40	48	52	58	50	48	34	29	6	19
YDR314C	17	11	31	37	41	37	70	79	76	77	35	38	32	47
YDR315C	5	1	4	17	14	22	25	22	26	12	3	12	19	9
YDR316W	19	11	7	18	16	50	60	42	57	33	24	40	31	17
YDR316W-A	0	0	0	0	0	0	0	0	0	0	0	0	0	0
YDR316W-B	0	0	0	0	0	0	0	0	0	0	0	0	0	0
YDR318W	11	7	18	15	5	15	53	33	33	39	23	17	6	19
YDR319C	22	14	29	13	11	28	36	36	29	27	13	18	10	27
YDR320C	49	42	39	39	28	74	135	75	68	73	58	52	53	43
YDR321W	136	164	144	188	149	184	144	120	159	180	192	181	137	188
YDR322W	14	17	12	27	25	18	48	43	27	36	39	35	37	45
YDR323C	9	10	17	10	18	14	56	43	31	40	16	39	17	27
YDR324C	89	100	104	224	153	197	184	131	154	226	193	147	146	173
YDR325W	35	46	83	111	93	117	191	120	117	116	104	121	83	56
YDR326C	126	130	90	249	164	202	339	313	281	242	219	176	149	163
YDR328C	80	61	59	80	67	104	122	109	78	103	99	85	82	75
YDR329C	13	6	29	41	35	33	64	61	63	53	35	39	28	15
YDR330W	35	17	20	43	30	52	65	96	69	57	38	38	43	32
YDR331W	62	46	29	75	55	83	156	82	90	110	82	70	65	45
YDR332W	24	7	16	30	24	33	62	28	71	50	34	24	13	31
YDR333C	68	37	48	58	59	59	116	143	211	105	91	86	47	65
YDR334W	150	115	115	683	640	749	353	337	351	244	157	174	183	226
YDR335W	149	92	126	250	94	195	254	365	323	189	162	179	135	143
YDR336W	0	0	1	11	0	7	6	13	3	4	7	9	1	5
YDR337W	15	11	18	23	32	27	86	57	59	51	22	30	34	29
YDR338C	37	16	33	49	30	39	89	80	69	55	65	43	48	38
YDR339C	17	22	17	21	29	37	42	38	47	54	64	37	19	13
YDR341C	490	466	410	509	448	395	397	336	331	566	490	489	395	569
YDR345C	458	311	283	393	330	380	883	674	711	449	525	367	407	391
YDR346C	173	148	187	484	307	379	460	352	280	395	280	283	184	254
YDR347W	48	27	34	31	42	60	84	94	66	56	41	50	32	20
YDR348C	41	49	35	65	61	86	120	118	102	117	101	104	57	66
YDR349C	70	76	102	123	105	92	182	135	115	129	142	84	85	75
YDR350C	33	19	28	43	50	67	89	75	136	53	70	56	16	30
YDR351W	35	15	20	97	86	113	101	115	110	91	67	71	29	39
YDR352W	15	30	51	23	34	47	52	79	53	64	70	48	42	27
YDR353W	195	197	163	221	220	256	232	208	205	310	265	241	225	224
YDR354W	63	34	35	64	32	43	72	45	32	70	51	70	53	38
YDR356W	37	48	85	129	101	142	192	194	119	115	128	131	58	75
YDR357C	11	3	7	12	9	12	19	22	27	32	19	20	6	14
YDR358W	19	9	18	34	24	19	68	78	50	47	31	29	43	26
YDR359C	73	80	88	156	114	129	241	198	186	158	151	155	119	102
YDR361C	48	54	73	97	80	80	118	88	77	103	74	76	69	59
YDR362C	15	14	25	55	35	37	85	52	93	42	42	30	21	28
YDR363W	12	21	20	41	29	19	89	85	55	52	49	43	30	29
YDR364C	10	33	21	44	25	39	118	66	63	41	46	35	19	43
YDR365C	160	117	117	383	277	329	406	295	290	451	277	267	159	183
YDR365W-A	0	0	0	0	0	0	0	0	0	0	0	0	0	0
YDR365W-B	1394	1343	1588	2492	2021	2782	4073	3707	3893	3518	3154	3071	2904	3598
YDR367W	3	3	2	8	0	1	0	0	3	6	3	1	2	1
YDR368W	83	53	77	72	70	83	123	90	66	114	112	78	83	91
YDR369C	17	18	16	37	20	33	44	58	50	28	46	35	30	44
YDR370C	10	15	31	64	64	58	58	42	55	79	51	36	21	41
YDR371W	23	21	12	40	40	33	88	43	38	35	20	38	24	28
YDR372C	85	64	120	141	93	166	126	138	124	182	129	141	96	147
YDR373W	57	53	39	70	47	57	92	33	76	95	59	64	40	58
YDR375C	25	14	24	44	21	38	98	56	65	38	44	31	34	23
YDR376W	27	40	27	35	34	46	93	55	44	81	50	37	37	41
YDR377W	43	27	30	54	39	50	85	62	44	69	66	66	44	43
YDR378C	47	54	55	125	97	122	121	161	131	195	115	101	79	64
YDR379W	21	46	20	59	59	50	145	138	92	80	81	68	22	52
YDR380W	2	12	42	15	17	20	6	20	5	35	73	41	17	31
YDR381W	84	69	73	165	112	165	147	127	149	147	116	102	85	110
YDR382W	579	537	834	974	644	806	1206	1111	868	925	980	785	569	824
YDR383C	5	10	6	10	3	12	18	28	18	26	20	13	3	10
YDR384C	95	57	43	102	51	70	73	79	83	330	120	99	43	110
YDR386W	8	18	16	31	22	28	71	50	18	47	25	22	21	19
YDR387C	29	17	24	43	34	35	78	73	42	35	27	22	14	20
YDR388W	151	168	149	207	192	208	374	245	242	245	203	221	172	193
YDR390C	39	40	44	42	67	61	100	84	66	83	61	80	60	54
YDR391C	3	4	3	0	2	7	4	2	6	2	1	2	4	7
YDR392W	52	26	33	70	35	52	133	108	103	107	84	76	53	46
YDR394W	162	137	133	96	114	115	176	193	119	221	187	172	156	136
YDR395W	224	230	241	312	235	245	366	239	309	346	322	304	191	330
YDR397C	3	0	14	9	2	3	13	2	4	3	12	1	4	11
YDR398W	67	101	115	195	175	319	189	166	172	202	149	152	99	93
YDR399W	82	89	116	228	179	202	123	175	139	183	138	155	70	76
YDR400W	43	42	39	72	55	53	88	72	65	72	59	74	40	51
YDR404C	37	41	42	161	141	173	110	90	72	91	68	74	36	67
YDR405W	15	21	15	14	29	15	79	67	58	37	41	48	22	42
YDR406W	34	8	17	16	9	18	175	123	107	14	8	19	20	11
YDR407C	114	89	70	174	110	173	248	268	217	204	190	191	82	140
YDR408C	41	19	35	66	54	54	125	79	81	77	49	56	37	24
YDR409W	20	38	33	55	54	63	192	131	99	113	64	62	51	50
YDR410C	6	8	5	8	8	17	15	31	16	22	19	17	11	9
YDR411C	21	25	34	22	26	34	38	35	47	51	43	46	64	39
YDR412W	17	24	34	63	59	49	71	42	52	73	64	79	42	48
YDR415C	81	63	57	48	59	183	76	101	241	110	97	78	41	67
YDR416W	35	35	39	65	41	69	108	120	60	92	73	66	37	41
YDR418W	932	860	978	1433	1125	1318	1152	1035	918	1571	1322	1375	1033	1422
YDR419W	37	8	7	18	26	52	74	60	50	25	18	33	21	20
YDR420W	25	32	27	47	33	34	104	80	91	76	54	46	50	52
YDR421W	27	24	16	42	24	37	129	84	50	61	41	53	26	35
YDR422C	81	47	78	89	84	118	256	175	155	136	93	100	67	100
YDR423C	27	28	31	63	43	58	149	130	101	79	59	78	33	30
YDR424C	3	1	4	5	7	1	13	0	3	2	8	0	0	1
YDR425W	5	15	18	38	21	33	79	44	41	54	22	37	26	14
YDR427W	61	47	60	119	60	136	104	116	105	155	108	144	66	112
YDR428C	26	36	25	57	29	40	92	33	537	92	47	38	34	45
YDR429C	122	162	91	297	172	207	209	186	174	284	201	255	130	174
YDR430C	37	37	35	32	9	28	84	67	51	50	56	59	41	52
YDR432W	400	337	310	776	566	860	385	389	495	668	487	483	331	546
YDR434W	84	78	50	94	65	116	109	85	146	141	71	76	71	83
YDR435C	26	15	10	16	21	17	29	31	42	20	31	28	26	7
YDR436W	19	16	19	38	29	43	127	74	80	74	44	48	34	25
YDR437W	11	6	7	24	19	27	53	46	48	29	41	28	16	28
YDR440W	22	37	21	61	58	87	103	71	50	81	50	66	38	46
YDR441C	31	13	28	57	55	44	98	72	45	57	42	33	17	30
YDR443C	56	63	52	83	84	101	165	201	145	102	89	129	57	107
YDR444W	23	22	36	48	45	63	104	82	88	66	55	52	36	63
YDR447C	121	80	95	119	167	174	77	103	85	142	164	104	71	144
YDR448W	10	11	39	192	146	150	161	69	60	72	69	74	35	32
YDR449C	15	11	17	60	13	36	74	44	34	69	34	33	21	34
YDR450W	76	98	65	101	113	107	58	83	91	145	91	116	59	84
YDR451C	22	26	10	118	118	121	128	95	102	75	74	44	38	26
YDR452W	129	111	77	101	85	135	270	221	181	159	144	166	110	136
YDR453C	3	1	3	1	10	14	24	16	14	5	2	14	8	4
YDR454C	110	123	158	211	144	217	215	165	150	212	166	178	135	172
YDR456W	108	78	81	79	74	121	229	137	126	132	117	110	89	85
YDR457W	70	90	121	115	92	92	215	216	147	175	130	179	111	175
YDR458C	22	19	34	89	68	91	117	85	74	75	67	73	34	52
YDR459C	29	14	10	22	30	35	44	69	29	32	60	32	14	27
YDR460W	29	2	11	43	21	27	42	39	28	72	49	54	15	17
YDR461W	63	47	72	367	246	354	270	234	412	333	283	255	123	140
YDR462W	14	16	11	25	33	21	45	54	31	31	42	25	19	8
YDR463W	45	50	67	104	64	87	174	130	124	137	99	105	58	99
YDR464W	18	28	51	52	21	40	102	84	100	75	52	49	40	61
YDR465C	83	52	71	101	73	84	104	92	89	120	93	72	63	63
YDR466W	65	37	50	123	91	142	183	161	176	107	94	88	80	82
YDR468C	9	26	14	54	40	57	134	49	53	55	41	50	35	30
YDR469W	13	14	10	32	23	27	49	35	10	42	34	35	14	44
YDR470C	54	22	27	38	29	30	81	76	65	46	27	47	40	22
YDR471W	10	14	13	17	32	35	11	23	9	20	16	20	1	10
YDR472W	17	14	13	13	34	20	50	29	25	52	23	27	10	32
YDR473C	7	5	8	20	25	20	69	34	42	22	24	33	10	31
YDR475C	45	37	32	49	33	40	143	133	88	93	39	59	28	26
YDR476C	25	43	22	36	40	28	64	79	44	51	26	31	34	18
YDR477W	85	77	89	108	86	95	186	128	119	143	103	143	84	72
YDR478W	8	3	18	10	6	11	12	14	7	13	10	16	4	5
YDR479C	21	21	14	41	40	44	121	69	76	59	57	21	30	34
YDR480W	25	8	12	30	17	29	33	57	33	26	25	28	22	18
YDR481C	245	191	221	264	232	262	410	394	319	368	339	311	271	240
YDR482C	8	5	3	19	24	17	33	37	24	17	27	18	7	5
YDR483W	183	251	221	253	177	266	396	278	224	323	280	260	234	250
YDR484W	14	12	19	28	40	21	57	45	32	49	31	31	21	30
YDR485C	44	26	29	67	56	74	143	107	92	91	107	75	45	34
YDR486C	11	8	7	20	20	13	59	29	35	46	22	22	20	16
YDR487C	70	78	82	122	89	135	127	101	122	140	110	78	58	71
YDR488C	34	19	21	52	41	38	67	40	67	46	41	38	8	28
YDR489W	18	16	21	41	14	20	49	57	40	45	26	52	24	23
YDR490C	47	22	21	33	28	58	118	98	69	51	36	44	41	27
YDR492W	12	14	36	35	13	23	52	36	24	31	26	22	6	28
YDR493W	2	2	0	8	8	8	34	21	24	22	19	29	15	11
YDR494W	18	24	13	30	34	36	66	63	62	64	39	36	30	20
YDR495C	0	0	1	0	0	3	0	1	0	0	4	1	0	1
YDR496C	42	75	77	198	129	110	144	142	99	179	108	113	68	146
YDR497C	228	227	218	249	217	267	300	277	276	426	327	289	238	242
YDR498C	13	20	17	23	15	43	33	44	27	34	25	31	29	22
YDR499W	17	19	47	62	54	62	142	85	68	48	52	56	37	27
YDR500C	51	49	49	85	64	66	83	74	75	129	97	98	57	53
YDR501W	7	18	17	28	26	30	52	20	71	30	23	33	9	20
YDR502C	234	190	164	244	205	295	199	176	214	301	214	253	221	210
YDR503C	13	21	22	8	26	16	74	36	76	49	56	48	30	20
YDR504C	20	13	16	102	53	65	90	47	36	44	42	33	17	18
YDR505C	88	66	54	170	131	176	256	206	1177	140	112	123	93	83
YDR506C	11	18	15	27	21	16	60	64	37	36	22	18	27	17
YDR507C	92	92	76	324	187	234	273	231	216	234	173	161	129	175
YDR508C	260	238	247	348	286	335	560	429	434	448	338	385	279	325
YDR510W	122	102	134	327	185	209	250	232	173	260	179	193	157	171
YDR511W	8	13	8	13	25	11	37	54	36	38	31	28	24	14
YDR512C	24	12	11	26	13	37	47	30	12	30	37	17	21	19
YDR513W	47	30	58	86	44	78	56	60	42	73	91	48	28	63
YDR514C	12	39	18	58	17	38	64	63	79	54	37	46	22	21
YDR515W	27	9	10	19	18	73	34	36	21	25	81	30	29	27
YDR516C	91	44	43	35	51	36	117	98	60	56	39	51	65	40
YDR517W	64	43	37	56	69	59	143	107	67	71	62	57	35	40
YDR518W	42	23	42	55	44	66	73	38	34	50	61	34	48	70
YDR519W	45	33	33	93	47	36	52	58	47	59	66	56	52	41
YDR520C	30	26	16	53	28	59	161	95	105	67	56	51	23	33
YDR524C	33	17	21	128	54	86	104	105	63	69	73	94	45	49
YDR527W	18	39	49	86	79	70	129	119	96	127	78	80	45	78
YDR528W	45	31	26	249	191	286	296	288	260	192	131	163	48	74
YDR529C	28	15	22	54	36	39	63	44	37	70	71	59	33	37
YDR530C	12	7	10	23	16	28	46	40	47	28	34	22	14	25
YDR531W	44	40	19	84	47	72	63	54	59	86	89	68	62	60
YDR532C	5	0	23	94	42	84	61	32	30	42	21	29	6	28
YDR533C	4	10	6	29	8	10	29	28	18	12	7	6	11	9
YDR538W	12	24	7	26	22	27	26	22	22	28	23	24	23	20
YDR539W	49	50	45	117	33	61	131	89	105	103	72	62	33	52
YDR540C	2	4	1	9	2	3	5	9	2	7	11	7	2	6
YDR541C	31	19	11	29	30	36	33	61	44	57	19	49	18	15
YDRCdelta2	0	0	0	0	0	1	1	3	0	0	0	0	0	3
YDRCdelta21	2	0	1	0	0	4	1	3	2	1	0	5	1	0
YDRCdelta22	0	0	0	0	0	0	0	0	0	0	0	0	0	0
YDRCdelta3	2	2	1	0	0	3	6	1	4	4	2	5	3	4
YDRCdelta4	0	0	0	3	0	0	0	0	1	1	0	1	1	0
YDRCdelta5	0	0	0	1	0	0	0	0	3	7	3	0	0	1
YDRCdelta6a	8	4	4	15	4	5	15	10	12	20	9	8	9	14
YDRCdelta6b	0	0	0	0	0	0	0	0	0	0	0	0	0	0
YDRCdelta7	0	1	0	0	2	0	0	0	0	0	1	0	1	0
YDRCdelta8	0	0	0	0	0	3	1	0	1	1	0	0	1	0
YDRCdelta9	1	1	0	2	0	0	0	1	0	0	0	0	3	4
YDRCsigma1	0	0	0	0	0	0	1	0	0	1	0	0	0	0
YDRCsigma2	0	0	0	0	0	0	0	0	0	0	0	0	0	0
YDRCsigma3	0	5	0	10	0	0	11	8	7	4	2	5	4	0
YDRCsigma4	0	0	0	0	0	0	0	0	0	0	0	0	0	0
YDRCsigma6	2	0	2	2	0	0	1	1	1	3	0	2	3	0
YDRWdelta10	0	0	1	1	0	0	0	0	0	3	4	0	0	0
YDRWdelta11	0	0	0	0	1	3	1	0	1	1	0	3	1	1
YDRWdelta12	1	2	2	6	8	3	8	15	7	8	30	8	0	2
YDRWdelta13	0	0	0	0	0	0	0	0	0	0	0	0	1	0
YDRWdelta14	0	0	1	0	3	0	0	0	0	0	0	0	0	0
YDRWdelta19	2	1	0	0	0	0	0	0	0	0	5	0	0	0
YDRWdelta20	0	0	0	0	0	0	0	1	1	0	0	0	0	2
YDRWdelta23	0	0	0	0	0	0	0	0	0	0	0	0	0	0
YDRWdelta24	1	3	0	0	1	0	2	1	1	0	0	3	0	0
YDRWdelta25	9	2	0	3	5	9	17	9	5	17	10	11	5	11
YDRWdelta26	6	1	0	1	1	4	8	9	2	11	7	1	5	8
YDRWdelta27	3	1	4	0	2	6	2	4	6	3	7	3	1	8
YDRWdelta28	117	37	58	107	36	61	120	55	56	183	51	43	59	94
YDRWdelta29	0	0	0	0	0	0	0	1	1	0	0	0	0	0
YDRWdelta30	0	0	1	0	0	0	0	0	1	0	0	0	0	1
YDRWdelta31	9	2	0	1	1	1	2	6	40	1	12	2	0	8
YDRWdelta7	1	2	2	1	3	5	9	8	7	2	2	10	4	14
YDRWsigma2	0	0	0	0	0	0	0	0	1	3	1	0	0	0
YDRWsigma4	0	0	0	0	0	0	0	2	0	0	0	2	0	0
YDRWsigma5	0	0	0	1	1	1	3	0	0	3	1	0	3	1
YEL001C	72	82	107	105	64	120	121	112	98	165	137	139	103	169
YEL002C	115	167	130	133	107	128	165	140	152	239	195	140	142	184
YEL004W	24	19	31	64	29	52	106	56	68	69	52	53	47	47
YEL005C	5	8	4	15	14	11	31	33	15	16	9	11	20	11
YEL006W	38	32	27	72	62	42	68	64	54	32	43	35	25	33
YEL007W	145	131	123	235	161	255	389	424	327	351	284	249	190	176
YEL011W	17	10	8	28	16	16	150	78	80	39	29	26	13	14
YEL012W	0	2	2	1	3	0	7	3	5	0	0	0	0	0
YEL013W	132	137	152	191	166	219	275	189	233	280	180	217	186	186
YEL015W	81	51	69	77	66	83	138	93	110	133	146	138	48	82
YEL016C	16	22	25	51	34	56	68	66	48	71	28	39	35	40
YEL017C-A	251	249	301	580	363	431	607	412	372	430	448	442	253	403
YEL017W	33	33	28	75	77	69	56	54	37	39	39	35	16	36
YEL018W	9	12	11	137	98	132	57	52	50	43	38	28	26	18
YEL019C	41	23	38	35	40	37	79	82	128	59	42	41	30	41
YEL021W	5	8	18	5	0	0	6	0	0	2	0	0	1	2
YEL022W	173	124	150	257	190	233	347	392	318	357	456	333	204	246
YEL024W	48	23	20	48	54	92	110	58	84	66	70	50	32	21
YEL025C	72	78	78	86	100	133	137	169	144	142	89	111	97	98
YEL026W	277	243	255	728	568	756	306	337	315	604	406	409	203	283
YEL027W	674	477	532	725	504	665	758	582	563	864	622	691	520	728
YEL029C	12	14	15	56	19	23	30	15	27	49	29	31	22	18
YEL031W	628	551	583	604	423	677	589	548	555	742	681	559	580	719
YEL032W	70	109	76	243	232	273	177	182	126	136	138	113	91	77
YEL034W	1318	1207	1210	1864	1620	1871	1195	1059	1020	1964	1377	1456	1031	1415
YEL036C	53	68	51	87	66	88	101	95	111	133	116	110	62	86
YEL037C	150	132	118	177	121	202	136	154	136	163	148	138	121	130
YEL038W	18	32	15	40	48	51	60	40	37	27	32	36	21	34
YEL039C	1	4	0	5	1	3	1	11	2	4	3	2	9	2
YEL040W	364	382	412	788	695	823	478	477	386	631	453	495	333	452
YEL042W	158	148	178	201	207	208	244	177	233	278	240	192	172	201
YEL043W	59	63	36	74	41	89	122	92	81	78	88	74	47	66
YEL044W	24	15	17	35	27	31	43	32	27	22	22	27	11	7
YEL046C	316	415	334	517	446	582	760	816	796	617	495	525	312	378
YEL047C	116	104	105	105	100	119	190	142	119	143	102	84	107	121
YEL048C	12	21	31	39	38	25	29	34	81	53	49	44	29	46
YEL050C	23	22	32	58	42	54	98	43	65	34	50	70	41	21
YEL051W	242	155	204	282	296	267	336	230	196	300	267	286	221	286
YEL052W	70	50	45	82	65	84	174	93	79	93	67	77	33	40
YEL053C	72	48	39	107	94	106	112	79	154	109	89	86	65	77
YEL054C	572	633	511	1121	733	1088	696	551	569	1377	979	979	554	798
YEL055C	88	142	126	126	101	129	159	163	162	176	138	140	122	184
YEL056W	41	33	128	46	31	43	80	75	50	65	86	69	36	37
YEL058W	92	93	123	94	107	110	156	170	123	163	130	110	80	102
YEL059C-A	0	0	0	4	1	5	6	0	2	6	2	4	0	7
YEL060C	96	71	61	159	126	176	278	231	231	114	111	93	115	114
YEL061C	30	31	47	601	357	549	300	162	251	160	121	117	61	66
YEL062W	23	20	8	40	40	26	52	51	41	41	30	30	17	20
YEL063C	82	108	123	225	152	187	247	227	233	181	158	137	104	114
YEL064C	23	6	21	18	19	22	66	53	55	40	53	21	23	18
YEL065W	194	102	113	163	118	144	909	841	698	377	197	214	193	122
YEL066W	17	14	30	11	32	13	26	42	35	35	18	26	17	10
YEL067C	3	6	4	5	6	5	23	13	8	7	6	11	0	3
YEL069C	1	0	1	1	1	0	0	0	1	0	0	0	0	1
[truncated: 3,946 more rows]
