# Supplementary material for: Genome-Wide Mapping of Decay Factor–mRNA Interactions in Yeast Identifies Nutrient-Responsive Transcripts as Targets of the Deadenylase Ccr4
Source: G3 (Bethesda). 2017 Nov 20;8(1):315–30. doi: 10.1534/g3.117.300415 (PMC5765359; doi:10.1534/g3.117.300415)
Supplement: Supplementary file 2 [file 315FileS2.xlsx]

## Sheet: GSE72366_RIP_enrichment.txt
gene	type	puf5.val	dhh1.val	ccr4.val
ARS1011	ARS	NA	NA	NA
ARS1012	ARS	NA	NA	NA
ARS1014	ARS	NA	NA	NA
ARS1018	ARS	NA	NA	NA
ARS1020	ARS	NA	NA	NA
ARS1022	ARS	NA	NA	NA
ARS1024	ARS	NA	NA	NA
ARS104	ARS	1.77894	NA	NA
ARS106	ARS	NA	NA	NA
ARS107	ARS	NA	NA	NA
ARS109	ARS	NA	NA	NA
ARS110	ARS	NA	NA	NA
ARS1103	ARS	NA	NA	NA
ARS1106	ARS	NA	NA	NA
ARS1109	ARS	NA	NA	NA
ARS1112	ARS	NA	NA	NA
ARS1113	ARS	NA	NA	NA
ARS1114	ARS	NA	NA	NA
ARS1116	ARS	NA	NA	NA
ARS1118	ARS	NA	NA	NA
ARS1120	ARS	NA	NA	2.90232
ARS1123	ARS	NA	NA	NA
ARS1125	ARS	NA	2.01756	NA
ARS1126	ARS	NA	NA	NA
ARS1206	ARS	NA	NA	NA
ARS1209	ARS	NA	NA	NA
ARS1211	ARS	NA	NA	NA
ARS1212	ARS	NA	NA	NA
ARS1213	ARS	NA	NA	NA
ARS1215	ARS	NA	NA	NA
ARS1216	ARS	NA	NA	NA
ARS1217	ARS	NA	NA	NA
ARS1218	ARS	NA	NA	NA
ARS1220	ARS	NA	NA	NA
ARS1223	ARS	NA	NA	NA
ARS1226	ARS	NA	NA	NA
ARS1232	ARS	NA	NA	NA
ARS1233	ARS	NA	NA	NA
ARS1234	ARS	NA	NA	NA
ARS1238	ARS	NA	NA	NA
ARS1303	ARS	NA	NA	NA
ARS1305	ARS	NA	NA	NA
ARS1307	ARS	NA	NA	NA
ARS1308	ARS	NA	NA	NA
ARS1309	ARS	NA	NA	NA
ARS1310	ARS	NA	NA	NA
ARS1312	ARS	NA	NA	NA
ARS1316	ARS	NA	2.10166	2.44814
ARS1320	ARS	NA	NA	NA
ARS1323	ARS	NA	NA	NA
ARS1324	ARS	2.8007	NA	NA
ARS1325	ARS	NA	NA	NA
ARS1327	ARS	NA	NA	NA
ARS1328	ARS	NA	NA	NA
ARS1329	ARS	NA	NA	NA
ARS1330	ARS	NA	NA	NA
ARS1332	ARS	NA	NA	NA
ARS1405	ARS	NA	NA	NA
ARS1406	ARS	NA	NA	NA
ARS1407	ARS	NA	NA	NA
ARS1411	ARS	NA	NA	NA
ARS1412	ARS	NA	NA	NA
ARS1414	ARS	NA	NA	NA
ARS1415	ARS	NA	NA	NA
ARS1417	ARS	NA	NA	NA
ARS1419	ARS	NA	NA	NA
ARS1420	ARS	NA	NA	NA
ARS1421	ARS	2.51807	1.87787	1.78372
ARS1422	ARS	NA	NA	NA
ARS1424	ARS	NA	NA	NA
ARS1426	ARS	NA	NA	NA
ARS1427	ARS	NA	NA	NA
ARS1507	ARS	NA	NA	NA
ARS1508	ARS	-3.52739	-3.24779	-3.49459
ARS1509	ARS	NA	NA	NA
ARS1510	ARS	NA	NA	NA
ARS1511	ARS	NA	NA	NA
ARS1513	ARS	NA	NA	NA
ARS1516	ARS	NA	NA	NA
ARS1519	ARS	NA	NA	NA
ARS1521	ARS	NA	NA	NA
ARS1523	ARS	NA	NA	NA
ARS1524	ARS	NA	NA	NA
ARS1526	ARS	NA	NA	NA
ARS1528	ARS	NA	NA	NA
ARS1529	ARS	NA	NA	NA
ARS1531	ARS	NA	NA	NA
ARS1604	ARS	1.98452	3.30239	3.51713
ARS1605	ARS	NA	NA	NA
ARS1607	ARS	NA	NA	NA
ARS1614	ARS	NA	NA	NA
ARS1618	ARS	NA	NA	NA
ARS1619	ARS	NA	NA	NA
ARS1622	ARS	NA	NA	NA
ARS1623	ARS	NA	NA	NA
ARS1624	ARS	NA	NA	NA
ARS1625	ARS	NA	NA	NA
ARS1626	ARS	1.36338	-1.88039	-2.10511
ARS1627	ARS	NA	NA	3.3412
ARS1628	ARS	NA	NA	NA
ARS1630	ARS	NA	NA	NA
ARS1631	ARS	NA	NA	NA
ARS1633	ARS	NA	NA	NA
ARS1634	ARS	NA	NA	NA
ARS1635	ARS	NA	NA	NA
ARS202	ARS	NA	NA	NA
ARS207	ARS	NA	NA	NA
ARS208	ARS	NA	NA	NA
ARS211	ARS	NA	NA	NA
ARS214	ARS	NA	NA	NA
ARS215	ARS	NA	NA	NA
ARS216	ARS	NA	NA	NA
ARS220	ARS	NA	NA	NA
ARS222	ARS	NA	NA	2.53717
ARS224	ARS	NA	2.31992	1.99585
ARS225	ARS	NA	NA	NA
ARS228	ARS	NA	NA	NA
ARS230	ARS	NA	NA	NA
ARS231	ARS	NA	NA	NA
ARS301	ARS	NA	NA	NA
ARS302	ARS	NA	NA	NA
ARS306	ARS	NA	NA	NA
ARS313	ARS	NA	NA	NA
ARS314	ARS	NA	NA	NA
ARS315	ARS	NA	NA	NA
ARS316	ARS	NA	NA	NA
ARS403	ARS	NA	NA	NA
ARS405	ARS	NA	NA	NA
ARS406	ARS	NA	NA	NA
ARS409	ARS	NA	NA	NA
ARS410	ARS	NA	NA	NA
ARS413	ARS	NA	NA	NA
ARS414	ARS	NA	NA	NA
ARS417	ARS	NA	NA	NA
ARS418	ARS	NA	NA	NA
ARS419	ARS	NA	NA	NA
ARS421	ARS	NA	NA	NA
ARS422	ARS	NA	NA	NA
ARS423	ARS	NA	NA	NA
ARS425	ARS	NA	NA	NA
ARS428	ARS	NA	NA	NA
ARS429	ARS	NA	NA	NA
ARS430	ARS	NA	NA	NA
ARS431	ARS	NA	NA	NA
ARS432	ARS	NA	NA	NA
ARS433	ARS	NA	NA	NA
ARS434	ARS	NA	NA	NA
ARS435	ARS	NA	NA	NA
ARS440	ARS	NA	NA	NA
ARS446	ARS	NA	NA	NA
ARS450	ARS	NA	NA	NA
ARS451	ARS	NA	NA	NA
ARS452	ARS	NA	NA	NA
ARS453	ARS	NA	NA	NA
ARS507	ARS	NA	NA	NA
ARS508	ARS	NA	NA	NA
ARS510	ARS	NA	NA	NA
ARS511	ARS	NA	NA	NA
ARS512	ARS	NA	NA	NA
ARS514	ARS	NA	NA	NA
ARS515	ARS	NA	NA	NA
ARS516	ARS	NA	NA	NA
ARS517	ARS	NA	NA	NA
ARS518	ARS	NA	NA	NA
ARS521	ARS	NA	NA	NA
ARS522	ARS	NA	NA	NA
ARS702	ARS	NA	NA	NA
ARS704	ARS	NA	NA	NA
ARS706	ARS	NA	NA	NA
ARS707	ARS	NA	NA	NA
ARS710	ARS	NA	NA	NA
ARS714	ARS	NA	NA	NA
ARS716	ARS	NA	NA	NA
ARS717	ARS	NA	NA	2.41574
ARS718	ARS	NA	NA	NA
ARS719	ARS	NA	NA	NA
ARS720	ARS	NA	NA	NA
ARS721	ARS	NA	NA	NA
ARS722	ARS	NA	NA	NA
ARS727	ARS	NA	NA	NA
ARS728	ARS	NA	NA	NA
ARS729	ARS	NA	NA	NA
ARS731	ARS	NA	2.44773	NA
ARS733	ARS	NA	NA	NA
ARS734	ARS	NA	NA	NA
ARS737	ARS	NA	NA	NA
ARS802	ARS	NA	NA	NA
ARS805	ARS	NA	NA	NA
ARS807	ARS	NA	NA	NA
ARS809	ARS	NA	NA	NA
ARS813	ARS	NA	NA	NA
ARS818	ARS	NA	NA	NA
ARS820	ARS	NA	NA	NA
ARS822	ARS	NA	NA	NA
ARS909	ARS	NA	NA	NA
ARS911	ARS	NA	NA	NA
ARS913	ARS	2.99927	NA	1.63654
ARS914	ARS	NA	NA	NA
ARS919	ARS	2.94915	NA	NA
ARS920	ARS	NA	NA	NA
ARS922	ARS	NA	NA	NA
ARS923	ARS	NA	NA	NA
HRA1	ncRNA	NA	NA	NA
LSR1	snRNA	-0.827116	-0.262733	0.604653
NME1	ncRNA	-0.549898	0.473239	0.990827
RDN37-1	rRNA	-0.0123972	-0.0204062	-0.0285174
RNA170	ncRNA	NA	NA	NA
RPR1	ncRNA	-0.840886	NA	0.600192
RUF5-1	ncRNA	NA	NA	NA
RUF5-2	ncRNA	NA	NA	3.17866
SCR1	ncRNA	-0.0271145	0.678648	1.28173
snR10	snoRNA	-1.09094	-0.648739	-0.345159
snR11	snoRNA	-1.8909	-1.84865	-0.559646
snR128	snoRNA	-1.46128	-0.830017	-0.602778
snR13	snoRNA	-1.60089	-1.13865	-0.649327
snR14	snRNA	-1.19006	-0.454817	0.647225
snR161	snoRNA	-0.803335	NA	0.810264
snR17b	snoRNA	-1.57785	-0.848811	-0.727052
snR18	snoRNA	-0.516956	NA	0.729729
snR189	snoRNA	NA	NA	1.0256
snR19	snRNA	-0.440047	0.367807	0.977131
snR190	snoRNA	-0.615156	NA	NA
snR191	snoRNA	-0.958576	-0.396504	-0.245574
snR24	snoRNA	-1.18757	0.82627	NA
snR3	snoRNA	-0.717445	NA	0.885148
snR30	snoRNA	-1.01107	-0.153592	0.257066
snR31	snoRNA	-1.18967	-0.808958	NA
snR32	snoRNA	-0.627177	NA	0.510932
snR33	snoRNA	-0.814003	-0.323247	NA
snR34	snoRNA	-0.442884	NA	0.480802
snR35	snoRNA	-1.0169	-0.476296	-0.000404834
snR36	snoRNA	-0.994993	NA	NA
snR37	snoRNA	-0.948807	NA	NA
snR39	snoRNA	NA	NA	NA
snR39B	snoRNA	-1.10832	NA	-0.710786
snR4	snoRNA	NA	NA	0.71205
snR40	snoRNA	-0.751652	NA	0.692577
snR41	snoRNA	-1.34523	-0.560663	-0.469219
snR42	snoRNA	-0.947	-0.484714	0.256335
snR43	snoRNA	-0.507927	NA	0.860791
snR45	snoRNA	-0.532604	NA	0.916501
snR46	snoRNA	-1.04198	NA	0.469374
snR47	snoRNA	NA	0.494211	0.77635
snR48	snoRNA	-1.952	-1.25911	-1.05123
snR49	snoRNA	-0.85323	NA	NA
snR5	snoRNA	-0.986841	-0.596637	-0.335316
snR50	snoRNA	NA	NA	NA
snR51	snoRNA	-1.53799	-1.39486	NA
snR52	snoRNA	-0.813917	NA	0.500479
snR53	snoRNA	NA	NA	NA
snR54	snoRNA	NA	NA	NA
snR55	snoRNA	-1.01522	NA	NA
snR56	snoRNA	-0.958626	NA	0.348719
snR57	snoRNA	-1.48992	NA	-0.862068
snR58	snoRNA	-1.30221	-0.547332	NA
snR6	snRNA	NA	0.852031	1.67431
snR60	snoRNA	-1.88073	-1.1986	-1.16153
snR61	snoRNA	-0.582316	-0.389374	NA
snR62	snoRNA	NA	1.81718	1.53246
snR63	snoRNA	-0.584178	NA	0.161377
snR64	snoRNA	NA	NA	1.03745
snR65	snoRNA	NA	NA	2.82673
snR66	snoRNA	-0.679161	-0.648732	NA
snR67	snoRNA	NA	NA	0.81973
snR68	snoRNA	-1.0807	-0.677593	NA
snR69	snoRNA	NA	NA	NA
snR7-L	snRNA	NA	NA	NA
snR7-S	snRNA	-0.912493	0.355979	1.2391
snR70	snoRNA	-1.37877	-0.619321	-0.589498
snR71	snoRNA	NA	NA	NA
snR78|77|76|75|74|73|72	snoRNA	-1.31314	NA	-0.530678
snR79	snoRNA	NA	NA	NA
snR8	snoRNA	-1.09836	-0.72168	-0.447056
snR80	snoRNA	-1.75084	-0.809312	-0.49705
snR81	snoRNA	-0.511858	NA	0.927011
snR82	snoRNA	-0.501354	NA	0.418717
snR83	snoRNA	-0.708295	NA	NA
snR84	snoRNA	-0.597828	NA	0.477591
snR85	snoRNA	-1.07039	-0.732166	0.374957
snR86	snoRNA	-0.661846	-0.469641	NA
snR87	snoRNA	-1.35314	-0.629272	-0.474935
snR9	snoRNA	-0.868132	-0.321688	NA
SRG1	ncRNA	1.59416	0.948539	1.98516
tA(AGC)D	tRNA-Ala1	0.909435	0.961695	1.14757
tA(AGC)F	tRNA-Ala1	NA	NA	1.45096
tA(AGC)G	tRNA-Ala1	NA	NA	NA
tA(AGC)H	tRNA-Ala1	NA	NA	NA
tA(AGC)J	tRNA-Ala1	NA	NA	NA
tA(AGC)K1	tRNA-Ala1	NA	NA	NA
tA(AGC)K2	tRNA-Ala1	NA	NA	NA
tA(AGC)L	tRNA-Ala1	NA	NA	NA
tA(AGC)M1	tRNA-Ala1	NA	NA	NA
tA(AGC)M2	tRNA-Ala1	NA	NA	NA
tA(AGC)P	tRNA-Ala1	NA	NA	NA
tA(UGC)A	tRNA-Ala2	0.92309	0.892777	1.66352
tA(UGC)E	tRNA-Ala2	NA	NA	1.47787
tA(UGC)G	tRNA-Ala2	NA	NA	1.29078
tA(UGC)L	tRNA-Ala2	NA	NA	1.15701
tA(UGC)O	tRNA-Ala2	NA	NA	NA
tC(GCA)B	tRNA-Cys	0.285042	0.668137	0.611013
tC(GCA)G	tRNA-Cys	NA	1.26912	1.51218
tC(GCA)P1	tRNA-Cys	NA	NA	NA
tC(GCA)P2	tRNA-Cys	NA	NA	NA
tD(GUC)B	tRNA-Asp	0.583892	0.448807	1.08838
tD(GUC)D	tRNA-Asp	1.54252	1.55881	1.93093
tD(GUC)G1	tRNA-Asp	NA	NA	NA
tD(GUC)G2	tRNA-Asp	NA	NA	NA
tD(GUC)I1	tRNA-Asp	NA	NA	NA
tD(GUC)I2	tRNA-Asp	NA	NA	NA
tD(GUC)J1	tRNA-Asp	NA	NA	NA
tD(GUC)J2	tRNA-Asp	NA	NA	NA
tD(GUC)J3	tRNA-Asp	NA	NA	NA
tD(GUC)J4	tRNA-Asp	NA	NA	NA
tD(GUC)K	tRNA-Asp	NA	NA	NA
tD(GUC)L1	tRNA-Asp	NA	NA	2.68352
tD(GUC)L2	tRNA-Asp	NA	NA	NA
tD(GUC)M	tRNA-Asp	NA	NA	NA
tD(GUC)N	tRNA-Asp	NA	NA	NA
tD(GUC)O	tRNA-Asp	NA	NA	NA
tE(CUC)D	tRNA-Glu	0.330926	0.618537	1.3319
tE(CUC)I	tRNA-Glu	NA	0.770299	1.91942
tE(UUC)B	tRNA-Glu	0.524125	0.712688	1.10403
tE(UUC)C	tRNA-Glu	1.01983	1.08325	1.51817
tE(UUC)E1	tRNA-Glu	NA	NA	NA
tE(UUC)E2	tRNA-Glu	0.909194	1.24345	1.65999
tE(UUC)E3	tRNA-Glu	0.727236	0.989416	1.14994
tE(UUC)G1	tRNA-Glu	NA	1.21634	1.40897
tE(UUC)G2	tRNA-Glu	NA	NA	NA
tE(UUC)G3	tRNA-Glu	1.13352	1.35228	1.94614
tE(UUC)I	tRNA-Glu	1.07892	1.02989	1.78515
tE(UUC)J	tRNA-Glu	NA	NA	NA
tE(UUC)K	tRNA-Glu	1.24341	1.42633	1.94377
tE(UUC)L	tRNA-Glu	0.923289	1.35767	1.53365
tE(UUC)M	tRNA-Glu	1.07035	1.45316	1.30895
tE(UUC)P	tRNA-Glu	0.85192	0.94647	1.39534
TEL01L-TR	telomeric_repeat	NA	NA	NA
TEL01L-XC	X_element_core_sequence	NA	NA	NA
TEL01L-XR	X_element_combinatorial_repeats	NA	NA	NA
TEL01R-TR	telomeric_repeat	NA	NA	NA
TEL01R-XC	X_element_core_sequence	NA	NA	NA
TEL02L-XC	X_element_core_sequence	NA	NA	NA
TEL02L-XR	X_element_combinatorial_repeats	NA	NA	NA
TEL02L-YP	Y'_element	1.1526	0.481172	1.15739
TEL02R-TR	telomeric_repeat	NA	NA	NA
TEL02R-XC	X_element_core_sequence	NA	NA	NA
TEL02R-XR	X_element_combinatorial_repeats	NA	NA	NA
TEL03L-TR	telomeric_repeat	1.15309	NA	NA
TEL03L-XC	X_element_core_sequence	NA	NA	NA
TEL03L-XR	X_element_combinatorial_repeats	NA	NA	NA
TEL03R-TR	telomeric_repeat	NA	NA	NA
TEL03R-XC	X_element_core_sequence	NA	NA	NA
TEL03R-XR	X_element_combinatorial_repeats	NA	NA	NA
TEL04L-TR	telomeric_repeat	NA	NA	NA
TEL04L-XC	X_element_core_sequence	NA	NA	NA
TEL04L-XR	X_element_combinatorial_repeats	NA	NA	NA
TEL04R-TR	telomeric_repeat	2.49119	NA	NA
TEL04R-XC	X_element_core_sequence	NA	NA	NA
TEL04R-XR	X_element_combinatorial_repeats	NA	NA	NA
TEL04R-YP	Y'_element	1.13032	0.394979	1.08319
TEL05L-XC	X_element_core_sequence	NA	NA	NA
TEL05L-YP	Y'_element	1.06141	NA	0.862997
TEL05R-XC	X_element_core_sequence	NA	NA	NA
TEL05R-XR	X_element_combinatorial_repeats	NA	NA	NA
TEL05R-YP	Y'_element	1.06074	NA	0.86033
TEL06L-TR	telomeric_repeat	2.19173	NA	NA
TEL06L-XC	X_element_core_sequence	NA	NA	NA
TEL06L-XR	X_element_combinatorial_repeats	NA	NA	NA
TEL06L-YP	Y'_element	1.43741	NA	1.37512
TEL06R-TR	telomeric_repeat	NA	NA	NA
TEL06R-XC	X_element_core_sequence	NA	NA	NA
TEL07L-TR	telomeric_repeat	NA	NA	NA
TEL07L-XC	X_element_core_sequence	NA	NA	NA
TEL07L-XR	X_element_combinatorial_repeats	NA	NA	NA
TEL07R-XC	X_element_core_sequence	NA	NA	NA
TEL07R-XR	X_element_combinatorial_repeats	NA	NA	NA
TEL07R-YP	Y'_element	1.89002	NA	2.66354
TEL08L-TR	telomeric_repeat	NA	NA	NA
TEL08L-XC	X_element_core_sequence	NA	NA	NA
TEL08L-XR	X_element_combinatorial_repeats	NA	NA	NA
TEL08L-YP	Y'_element	NA	NA	NA
TEL08R-TR1	telomeric_repeat	NA	NA	NA
TEL08R-TR2	telomeric_repeat	1.86554	NA	NA
TEL08R-XC	X_element_core_sequence	NA	NA	NA
TEL08R-XR	X_element_combinatorial_repeats	NA	NA	NA
TEL08R-YP	Y'_element	NA	NA	2.44084
TEL09L-TR	telomeric_repeat	2.23498	NA	NA
TEL09L-XC	X_element_core_sequence	NA	NA	NA
TEL09L-XR	X_element_combinatorial_repeats	NA	NA	NA
TEL09L-YP	Y'_element	1.16461	NA	0.998459
TEL09R-TR	telomeric_repeat	NA	NA	NA
TEL09R-XC	X_element_core_sequence	NA	NA	NA
TEL09R-XR	X_element_combinatorial_repeats	NA	NA	NA
TEL10L-TR	telomeric_repeat	NA	NA	NA
TEL10L-XC	X_element_core_sequence	NA	NA	NA
TEL10L-XR	X_element_combinatorial_repeats	NA	NA	NA
TEL10L-YP	Y'_element	NA	NA	NA
TEL10R-TR	telomeric_repeat	NA	NA	NA
TEL10R-XC	X_element_core_sequence	NA	NA	NA
TEL10R-XR	X_element_combinatorial_repeats	NA	NA	NA
TEL11L-TR	telomeric_repeat	NA	NA	NA
TEL11L-XC	X_element_core_sequence	NA	NA	NA
TEL11L-XR	X_element_combinatorial_repeats	NA	NA	NA
TEL11R-TR	telomeric_repeat	1.57631	NA	NA
TEL11R-XC	X_element_core_sequence	NA	NA	NA
TEL11R-XR	X_element_combinatorial_repeats	NA	NA	NA
TEL12L-TR1	telomeric_repeat	NA	NA	NA
TEL12L-TR2	telomeric_repeat	NA	NA	NA
TEL12L-TR3	telomeric_repeat	2.48577	NA	NA
TEL12L-XC	X_element_core_sequence	NA	NA	NA
TEL12L-XR	X_element_combinatorial_repeats	NA	NA	NA
TEL12L-YP1	Y'_element	NA	NA	NA
TEL12L-YP2	Y'_element	NA	NA	NA
TEL12R-TR1	telomeric_repeat	NA	NA	NA
TEL12R-TR2	telomeric_repeat	3.03702	NA	1.59667
TEL12R-XC	X_element_core_sequence	NA	NA	NA
TEL12R-XR	X_element_combinatorial_repeats	NA	NA	NA
TEL12R-YP1	Y'_element	NA	NA	NA
TEL12R-YP2	Y'_element	NA	NA	NA
TEL13L-TR1	telomeric_repeat	NA	NA	NA
TEL13L-TR2	telomeric_repeat	NA	NA	NA
TEL13L-XC	X_element_core_sequence	NA	NA	NA
TEL13L-XR	X_element_combinatorial_repeats	NA	NA	NA
TEL13L-YP	Y'_element	NA	NA	NA
TEL13R-TR	telomeric_repeat	NA	NA	NA
TEL13R-XC	X_element_core_sequence	NA	NA	NA
TEL13R-XR	X_element_combinatorial_repeats	2.15605	NA	NA
TEL14L-TR	telomeric_repeat	NA	NA	NA
TEL14L-XC	X_element_core_sequence	NA	NA	NA
TEL14L-XR	X_element_combinatorial_repeats	NA	NA	NA
TEL14L-YP	Y'_element	NA	NA	NA
TEL14R-TR	telomeric_repeat	NA	NA	NA
TEL14R-XC	X_element_core_sequence	NA	NA	NA
TEL14R-XR	X_element_combinatorial_repeats	NA	NA	NA
TEL15L-TR	telomeric_repeat	NA	NA	NA
TEL15L-XC	X_element_core_sequence	NA	NA	NA
TEL15L-XR	X_element_combinatorial_repeats	NA	NA	NA
TEL15R-TR	telomeric_repeat	NA	NA	NA
TEL15R-XC	X_element_core_sequence	NA	NA	NA
TEL15R-XR	X_element_combinatorial_repeats	NA	NA	NA
TEL15R-YP	Y'_element	NA	NA	NA
TEL16L-XC	X_element_core_sequence	NA	NA	NA
TEL16L-XR	X_element_combinatorial_repeats	NA	NA	NA
TEL16L-YP	Y'_element	NA	NA	NA
TEL16R-XC	X_element_core_sequence	NA	NA	NA
TEL16R-YP	Y'_element	NA	NA	NA
tF(GAA)B	tRNA-Phe	NA	NA	NA
tF(GAA)D	tRNA-Phe	NA	NA	NA
tF(GAA)F	tRNA-Phe	NA	NA	NA
tF(GAA)G	tRNA-Phe	NA	NA	NA
tF(GAA)H1	tRNA-Phe	NA	NA	NA
tF(GAA)H2	tRNA-Phe	NA	NA	NA
tF(GAA)M	tRNA-Phe	NA	NA	NA
tF(GAA)N	tRNA-Phe	NA	NA	NA
tF(GAA)P1	tRNA-Phe	NA	NA	NA
tF(GAA)P2	tRNA-Phe	NA	NA	NA
tG(CCC)D	tRNA-Gly	1.23422	1.06688	1.77211
tG(CCC)O	tRNA-Gly	NA	NA	1.09103
tG(GCC)B	tRNA-Gly	0.870508	0.724299	1.47785
tG(GCC)C	tRNA-Gly	NA	NA	NA
tG(GCC)D1	tRNA-Gly	NA	NA	NA
tG(GCC)D2	tRNA-Gly	NA	NA	1.38843
tG(GCC)E	tRNA-Gly	NA	NA	NA
tG(GCC)F1	tRNA-Gly	NA	NA	NA
tG(GCC)F2	tRNA-Gly	NA	NA	NA
tG(GCC)G1	tRNA-Gly	NA	NA	NA
tG(GCC)G2	tRNA-Gly	NA	NA	NA
tG(GCC)J1	tRNA-Gly	NA	NA	NA
tG(GCC)J2	tRNA-Gly	NA	NA	NA
tG(GCC)M	tRNA-Gly	NA	NA	NA
tG(GCC)O1	tRNA-Gly	NA	NA	NA
tG(GCC)O2	tRNA-Gly	NA	NA	NA
tG(GCC)P1	tRNA-Gly	NA	NA	NA
tG(GCC)P2	tRNA-Gly	NA	NA	NA
tG(UCC)G	tRNA-Gly	NA	1.11762	1.27419
tG(UCC)N	tRNA-Gly	NA	NA	1.5796
tG(UCC)O	tRNA-Gly	NA	NA	1.64363
tH(GUG)E1	tRNA-His	NA	0.678709	0.834134
tH(GUG)E2	tRNA-His	0.902116	1.19771	1.61269
tH(GUG)G1	tRNA-His	NA	0.929896	1.56973
tH(GUG)G2	tRNA-His	NA	1.12402	1.31703
tH(GUG)H	tRNA-His	NA	1.17367	1.45104
tH(GUG)K	tRNA-His	NA	1.51058	1.10182
tH(GUG)M	tRNA-His	NA	NA	NA
tI(AAU)B	tRNA-Ile	0.957563	0.966094	NA
tI(AAU)D	tRNA-Ile	NA	NA	NA
tI(AAU)E1	tRNA-Ile	NA	NA	NA
tI(AAU)E2	tRNA-Ile	NA	NA	NA
tI(AAU)G	tRNA-Ile	NA	NA	NA
tI(AAU)I1	tRNA-Ile	NA	NA	NA
tI(AAU)I2	tRNA-Ile	NA	NA	NA
tI(AAU)L1	tRNA-Ile	NA	NA	NA
tI(AAU)L2	tRNA-Ile	NA	NA	NA
tI(AAU)N1	tRNA-Ile	NA	NA	NA
tI(AAU)N2	tRNA-Ile	NA	NA	NA
tI(AAU)P1	tRNA-Ile	NA	NA	NA
tI(AAU)P2	tRNA-Ile	NA	NA	NA
tI(UAU)D	tRNA-Ile	-0.770521	NA	NA
tI(UAU)L	tRNA-Ile	NA	NA	NA
tK(CUU)C	tRNA-Lys	NA	NA	NA
tK(CUU)D1	tRNA-Lys	NA	NA	NA
tK(CUU)D2	tRNA-Lys	NA	NA	NA
tK(CUU)E1	tRNA-Lys	NA	NA	NA
tK(CUU)E2	tRNA-Lys	NA	NA	NA
tK(CUU)F	tRNA-Lys	NA	NA	NA
tK(CUU)G1	tRNA-Lys	NA	NA	NA
tK(CUU)G2	tRNA-Lys	NA	NA	NA
tK(CUU)G3	tRNA-Lys	NA	NA	NA
tK(CUU)I	tRNA-Lys	NA	NA	NA
tK(CUU)J	tRNA-Lys	NA	NA	NA
tK(CUU)K	tRNA-Lys	NA	NA	NA
tK(CUU)M	tRNA-Lys	NA	NA	NA
tK(CUU)P	tRNA-Lys	NA	NA	NA
tK(UUU)D	tRNA-Lys	NA	NA	NA
tK(UUU)G1	tRNA-Lys	NA	NA	NA
tK(UUU)G2	tRNA-Lys	NA	NA	NA
tK(UUU)K	tRNA-Lys	NA	NA	NA
tK(UUU)L	tRNA-Lys	NA	NA	NA
tK(UUU)O	tRNA-Lys	NA	NA	NA
tK(UUU)P	tRNA-Lys	NA	NA	NA
tL(CAA)A	tRNA-Leu	NA	NA	0.787754
tL(CAA)C	tRNA-Leu	NA	NA	NA
tL(CAA)D	tRNA-Leu	NA	NA	NA
tL(CAA)G1	tRNA-Leu	NA	NA	NA
tL(CAA)G2	tRNA-Leu	NA	2.75232	NA
tL(CAA)G3	tRNA-Leu	NA	NA	NA
tL(CAA)K	tRNA-Leu	NA	NA	NA
tL(CAA)L	tRNA-Leu	NA	NA	NA
tL(CAA)M	tRNA-Leu	NA	NA	NA
tL(CAA)N	tRNA-Leu	NA	NA	NA
tL(GAG)G	tRNA-Leu	NA	NA	1.49221
tL(UAA)B1	tRNA-Leu	NA	NA	1.28292
tL(UAA)B2	tRNA-Leu	NA	NA	1.11337
tL(UAA)D	tRNA-Leu	0.868376	0.756693	1.32332
tL(UAA)J	tRNA-Leu	NA	NA	NA
tL(UAA)K	tRNA-Leu	NA	NA	1.49384
tL(UAA)L	tRNA-Leu	NA	NA	NA
tL(UAA)N	tRNA-Leu	NA	NA	NA
tL(UAG)J	tRNA-Leu	NA	NA	NA
tL(UAG)L1	tRNA-Leu	NA	NA	NA
tL(UAG)L2	tRNA-Leu	NA	NA	NA
TLC1	ncRNA	NA	0.735907	0.88591
tM(CAU)C	tRNA-Met	NA	NA	NA
tM(CAU)D	tRNA-Met	NA	NA	NA
tM(CAU)E	tRNA-IMet	NA	NA	NA
tM(CAU)J1	tRNA-Met	NA	NA	NA
tM(CAU)J2	tRNA-Met	NA	NA	NA
tM(CAU)J3	tRNA-IMet	NA	NA	NA
tM(CAU)M	tRNA-Met	NA	NA	NA
tM(CAU)O1	tRNA-IMet	NA	NA	NA
tM(CAU)O2	tRNA-Met	NA	NA	NA
tM(CAU)P	tRNA-IMet	NA	NA	NA
tN(GUU)C	tRNA-Asn	NA	1.15081	NA
tN(GUU)F	tRNA-Asn	NA	NA	NA
tN(GUU)G	tRNA-Asn	NA	NA	NA
tN(GUU)K	tRNA-Asn	NA	NA	NA
tN(GUU)L	tRNA-Asn	NA	NA	NA
tN(GUU)N1	tRNA-Asn	NA	NA	NA
tN(GUU)N2	tRNA-Asn	NA	NA	NA
tN(GUU)O1	tRNA-Asn	NA	NA	NA
tN(GUU)O2	tRNA-Asn	NA	NA	NA
tN(GUU)P	tRNA-Asn	NA	NA	NA
tP(AGG)C	tRNA-Pro	NA	NA	NA
tP(AGG)N	tRNA-Pro	NA	NA	NA
tP(UGG)A	tRNA-Pro	NA	-0.413821	NA
tP(UGG)F	tRNA-Pro	NA	NA	NA
tP(UGG)H	tRNA-Pro	NA	NA	NA
tP(UGG)L	tRNA-Pro	NA	NA	NA
tP(UGG)M	tRNA-Pro	NA	NA	NA
tP(UGG)N1	tRNA-Pro	NA	NA	NA
tP(UGG)N2	tRNA-Pro	NA	NA	NA
tP(UGG)O1	tRNA-Pro	NA	NA	NA
tP(UGG)O2	tRNA-Pro	NA	NA	NA
tP(UGG)O3	tRNA-Pro	NA	NA	NA
tQ(CUG)M	tRNA-Gln	0.587882	1.0399	1.29421
tQ(UUG)B	tRNA-Gln	NA	NA	NA
tQ(UUG)C	tRNA-Gln	-0.508638	-0.32749	-0.0013665
tQ(UUG)D1	tRNA-Gln	NA	NA	NA
tQ(UUG)D2	tRNA-Gln	NA	NA	NA
tQ(UUG)D3	tRNA-Gln	NA	NA	NA
tQ(UUG)E1	tRNA-Gln	NA	NA	NA
tQ(UUG)E2	tRNA-Gln	NA	1.48138	1.57351
tQ(UUG)H	tRNA-Gln	NA	NA	NA
tQ(UUG)L	tRNA-Gln	NA	NA	NA
tR(ACG)D	tRNA-Arg2	NA	NA	0.748783
tR(ACG)E	tRNA-Arg2	NA	NA	NA
tR(ACG)J	tRNA-Arg2	NA	NA	NA
tR(ACG)K	tRNA-Arg2	NA	NA	2.59334
tR(ACG)L	tRNA-Arg2	NA	NA	NA
tR(ACG)O	tRNA-Arg2	NA	NA	NA
tR(CCG)L	tRNA-Arg4	NA	NA	1.6573
tR(CCU)J	tRNA-Arg1	NA	NA	NA
tR(UCU)B	tRNA-Arg3	NA	NA	0.68523
tR(UCU)D	tRNA-Arg3	NA	NA	NA
tR(UCU)E	tRNA-Arg3	NA	NA	NA
tR(UCU)G1	tRNA-Arg3	NA	NA	NA
tR(UCU)G2	tRNA-Arg3	NA	NA	NA
tR(UCU)G3	tRNA-Arg3	NA	NA	NA
tR(UCU)J1	tRNA-Arg3	NA	NA	NA
tR(UCU)J2	tRNA-Arg3	NA	NA	NA
tR(UCU)K	tRNA-Arg3	NA	NA	NA
tR(UCU)M1	tRNA-Arg3	NA	NA	NA
tR(UCU)M2	tRNA-Arg3	NA	NA	NA
tS(AGA)A	tRNA-Ser	0.428069	0.471009	1.22001
tS(AGA)B	tRNA-Ser	NA	NA	NA
tS(AGA)D1	tRNA-Ser	0.814288	NA	1.35857
tS(AGA)D2	tRNA-Ser	NA	NA	1.84316
tS(AGA)D3	tRNA-Ser	NA	NA	NA
tS(AGA)E	tRNA-Ser	NA	NA	2.13806
tS(AGA)G	tRNA-Ser	NA	NA	NA
tS(AGA)H	tRNA-Ser	NA	0.95364	1.36269
tS(AGA)J	tRNA-Ser	NA	NA	NA
tS(AGA)L	tRNA-Ser	NA	NA	NA
tS(AGA)M	tRNA-Ser	NA	NA	NA
tS(CGA)C	tRNA-Ser	0.801481	NA	1.51809
tS(GCU)F	tRNA-Ser	NA	NA	1.47097
tS(GCU)L	tRNA-Ser	NA	NA	1.93273
tS(GCU)O	tRNA-Ser	NA	NA	NA
tS(UGA)E	tRNA-Ser	0.753185	0.937839	1.40412
tS(UGA)I	tRNA-Ser	1.3419	2.08406	2.0777
tS(UGA)P	tRNA-Ser	NA	NA	1.60961
tT(AGU)B	tRNA-Thr	NA	NA	NA
tT(AGU)C	tRNA-Thr	NA	NA	NA
tT(AGU)D	tRNA-Thr	-2.71022	NA	NA
tT(AGU)H	tRNA-Thr	NA	NA	NA
tT(AGU)I1	tRNA-Thr	NA	NA	NA
tT(AGU)I2	tRNA-Thr	NA	NA	NA
tT(AGU)J	tRNA-Thr	NA	NA	NA
tT(AGU)N1	tRNA-Thr	NA	NA	NA
tT(AGU)N2	tRNA-Thr	NA	NA	NA
tT(AGU)O1	tRNA-Thr	NA	NA	NA
tT(AGU)O2	tRNA-Thr	NA	NA	NA
tT(CGU)K	tRNA-Thr	1.42416	1.27531	1.9996
tT(UGU)G1	tRNA-Thr	NA	NA	NA
tT(UGU)G2	tRNA-Thr	NA	NA	NA
tT(UGU)H	tRNA-Thr	NA	NA	NA
tT(UGU)P	tRNA-Thr	NA	NA	NA
tV(AAC)E1	tRNA-Val	NA	NA	NA
tV(AAC)E2	tRNA-Val	NA	0.735645	NA
tV(AAC)G1	tRNA-Val	NA	NA	NA
tV(AAC)G2	tRNA-Val	NA	NA	NA
tV(AAC)G3	tRNA-Val	NA	NA	NA
tV(AAC)H	tRNA-Val	NA	NA	NA
tV(AAC)J	tRNA-Val	NA	NA	NA
tV(AAC)K1	tRNA-Val	NA	NA	NA
tV(AAC)K2	tRNA-Val	NA	NA	NA
tV(AAC)L	tRNA-Val	NA	NA	NA
tV(AAC)M1	tRNA-Val	NA	NA	NA
tV(AAC)M2	tRNA-Val	NA	NA	NA
tV(AAC)M3	tRNA-Val	NA	NA	NA
tV(AAC)O	tRNA-Val	NA	NA	NA
tV(CAC)D	tRNA-Val	NA	0.91062	NA
tV(CAC)H	tRNA-Val	NA	NA	NA
tV(UAC)B	tRNA-Val	1.26455	1.2375	1.42149
tV(UAC)D	tRNA-Val	NA	NA	NA
tW(CCA)G1	tRNA-Trp	NA	0.390664	0.753328
tW(CCA)G2	tRNA-Trp	NA	NA	NA
tW(CCA)J	tRNA-Trp	NA	NA	NA
tW(CCA)K	tRNA-Trp	NA	NA	NA
tW(CCA)M	tRNA-Trp	NA	NA	NA
tW(CCA)P	tRNA-Trp	NA	NA	NA
tX(XXX)D	tRNA-Undet	NA	1.11484	1.74376
tY(GUA)D	tRNA-Tyr	NA	0.888878	1.01029
tY(GUA)F1	tRNA-Tyr	NA	NA	NA
tY(GUA)F2	tRNA-Tyr	NA	NA	NA
tY(GUA)J1	tRNA-Tyr	NA	NA	NA
tY(GUA)J2	tRNA-Tyr	NA	NA	NA
tY(GUA)M1	tRNA-Tyr	NA	NA	NA
tY(GUA)M2	tRNA-Tyr	NA	NA	NA
tY(GUA)O	tRNA-Tyr	NA	NA	NA
YAL001C	mRNA	1.26257	0.784597	1.8269
YAL002W	mRNA	NA	NA	1.39341
YAL003W	mRNA	NA	NA	NA
YAL007C	mRNA	NA	0.775466	NA
YAL008W	mRNA	NA	NA	NA
YAL009W	mRNA	1.95049	2.17352	2.61784
YAL010C	mRNA	NA	1.10135	2.0238
YAL011W	mRNA	3.01612	1.00907	2.08361
YAL012W	mRNA	NA	0.432172	NA
YAL013W	mRNA	1.24018	1.45213	1.84479
YAL014C	mRNA	1.38065	0.780416	1.36482
YAL016W	mRNA	NA	0.485974	0.846905
YAL017W	mRNA	NA	0.805316	1.80839
YAL019W	mRNA	NA	0.907902	0.882628
YAL020C	mRNA	NA	1.27318	1.68808
YAL021C	mRNA	0.695023	0.954802	1.72651
YAL022C	mRNA	NA	0.824563	0.909849
YAL023C	mRNA	NA	0.338455	0.364785
YAL024C	mRNA	0.73213	1.22472	1.87765
YAL025C	mRNA	2.25508	1.53828	1.43316
YAL026C	mRNA	NA	0.574287	0.566018
YAL027W	mRNA	1.41946	1.58853	1.59419
YAL029C	mRNA	0.705847	1.44267	1.78467
YAL030W	mRNA	NA	NA	2.3167
YAL031C	mRNA	0.79757	1.24726	1.85098
YAL032C	mRNA	3.19005	2.08265	2.77887
YAL033W	mRNA	NA	NA	1.35346
YAL034W-A	mRNA	2.13463	2.24519	1.90528
YAL035W	mRNA	0.584652	1.02769	0.804598
YAL036C	mRNA	NA	0.868782	0.750875
YAL037W	mRNA	NA	NA	NA
YAL038W	mRNA	-0.153982	0.0355153	0.0253514
YAL039C	mRNA	NA	1.39235	2.1821
YAL040C	mRNA	0.829422	1.57495	2.60349
YAL041W	mRNA	0.840349	1.17437	1.58553
YAL042W	mRNA	NA	0.3807	0.53196
YAL043C	mRNA	0.646166	1.19241	1.31972
YAL044C	mRNA	0.531572	0.860712	1.90205
YAL046C	mRNA	2.22783	1.23574	1.76332
YAL047C	mRNA	0.96083	1.0769	1.30186
YAL048C	mRNA	NA	1.07365	1.81444
YAL049C	mRNA	NA	NA	1.08469
YAL051W	mRNA	NA	0.720999	1.29353
YAL053W	mRNA	0.575862	0.655562	0.850266
YAL055W	mRNA	2.75921	NA	1.53993
YAL056W	mRNA	0.983458	1.56153	2.23806
YAL058W	mRNA	NA	NA	1.13035
YAL059W	mRNA	1.30021	1.28523	1.54445
YAL060W	mRNA	1.09619	1.12337	1.68479
YAL061W	mRNA	NA	NA	3.33467
YAL062W	mRNA	1.91755	NA	NA
YALCdelta2	Ty1	NA	NA	NA
YALWdelta1	Ty1	NA	NA	NA
YAR002C-A	mRNA	NA	NA	NA
YAR002W	mRNA	NA	0.58849	1.13348
YAR003W	mRNA	NA	1.58051	2.44006
YAR007C	mRNA	0.999336	0.655969	0.820732
YAR008W	mRNA	1.91193	1.36474	1.07309
YAR009C	transposable_element_gene	0.558032	0.999033	1.46612
YAR010C	transposable_element_gene	0.269173	0.647759	1.10128
YAR014C	mRNA	NA	1.35383	1.41329
YAR015W	mRNA	NA	0.434728	1.28717
YAR018C	mRNA	0.771593	NA	1.29596
YAR019C	mRNA	NA	NA	1.29487
YAR027W	mRNA	NA	NA	1.14632
YAR028W	mRNA	NA	1.22641	2.06119
YAR031W	mRNA	NA	1.10567	1.40573
YAR042W	mRNA	0.540537	0.817512	1.61433
YARCdelta3	Ty1	NA	NA	NA
YARCdelta4	Ty1-3'LTR	NA	0.660399	0.979131
YARCdelta5	Ty1-5'LTR	-0.344669	NA	0.257323
YARCdelta8	Ty1	NA	NA	NA
YARWdelta6	Ty1	0.635412	1.28484	1.51658
YARWdelta7	Ty2	0.547276	1.20784	1.5559
YARWsigma1	Ty3	1.32691	1.98768	1.62079
YBL001C	mRNA	NA	0.941053	1.29866
YBL002W	mRNA	1.85898	0.72524	0.787998
YBL003C	mRNA	0.954451	1.15849	1.17199
YBL004W	mRNA	NA	0.488929	0.680835
YBL005W	mRNA	NA	0.803855	2.60717
YBL005W-A	transposable_element_gene	NA	NA	NA
YBL005W-B	transposable_element_gene	0.432845	0.910972	1.62242
YBL006C	mRNA	1.46892	1.82659	2.09656
YBL007C	mRNA	NA	0.647501	0.867133
YBL008W	mRNA	NA	0.950321	0.870914
YBL009W	mRNA	NA	0.810755	0.933719
YBL010C	mRNA	NA	1.23843	0.893187
YBL011W	mRNA	1.40178	0.744478	0.992044
YBL014C	mRNA	1.34361	1.46829	2.07155
YBL015W	mRNA	NA	NA	1.17306
YBL016W	mRNA	NA	0.996524	NA
YBL017C	mRNA	NA	0.388008	0.519745
YBL018C	mRNA	NA	NA	NA
YBL019W	mRNA	NA	NA	1.67268
YBL020W	mRNA	0.803518	1.02136	1.11908
YBL021C	mRNA	2.41438	1.84726	1.65369
YBL022C	mRNA	NA	0.608045	0.940438
YBL023C	mRNA	1.262	0.701267	0.821179
YBL024W	mRNA	0.453641	0.740194	0.612377
YBL025W	mRNA	NA	1.14859	0.992846
YBL026W	mRNA	NA	1.92451	NA
YBL028C	mRNA	2.67181	1.79998	1.2534
YBL029W	mRNA	NA	2.30551	2.53504
YBL030C	mRNA	NA	NA	0.400118
YBL031W	mRNA	NA	1.64103	1.52972
YBL032W	mRNA	0.710528	0.974854	0.682132
YBL033C	mRNA	0.89883	0.958254	1.60308
YBL034C	mRNA	0.695915	0.979154	1.48274
YBL035C	mRNA	NA	0.792741	0.881017
YBL037W	mRNA	0.922464	1.00081	1.34643
YBL038W	mRNA	1.03509	1.06805	2.16414
YBL039C	mRNA	0.506702	0.630086	NA
YBL040C	mRNA	NA	NA	NA
YBL041W	mRNA	0.502695	0.943229	0.499012
YBL042C	mRNA	0.462083	0.677096	0.850822
YBL043W	mRNA	NA	NA	NA
YBL044W	mRNA	NA	NA	NA
YBL045C	mRNA	NA	NA	0.71664
YBL046W	mRNA	NA	1.09162	1.34792
YBL047C	mRNA	0.471275	0.65839	1.10531
YBL050W	mRNA	NA	NA	1.90284
YBL051C	mRNA	1.03136	1.21761	1.14439
YBL052C	mRNA	2.31338	1.83499	1.86711
YBL054W	mRNA	2.00259	1.74757	1.55736
YBL055C	mRNA	NA	0.937725	0.891657
YBL056W	mRNA	0.879028	1.01479	1.38928
YBL057C	mRNA	0.757763	0.954314	1.25441
YBL058W	mRNA	NA	0.576344	0.641423
YBL059W	mRNA	NA	NA	2.59848
YBL060W	mRNA	NA	0.84018	1.09825
YBL061C	mRNA	NA	1.19805	1.35633
YBL063W	mRNA	2.15479	1.53361	1.84061
YBL064C	mRNA	NA	NA	0.81638
YBL066C	mRNA	1.90206	1.09391	1.90404
YBL067C	mRNA	1.17836	1.14306	1.25557
YBL068W	mRNA	NA	0.564597	NA
YBL069W	mRNA	1.08825	0.944612	NA
YBL072C	mRNA	NA	NA	NA
YBL074C	mRNA	NA	NA	0.843895
YBL076C	mRNA	0.330412	0.466361	NA
YBL078C	mRNA	1.39875	1.41314	1.81167
YBL079W	mRNA	0.710907	0.962265	1.2462
YBL080C	mRNA	NA	1.34224	1.88124
YBL081W	mRNA	1.9936	1.56831	1.95325
YBL082C	mRNA	0.873689	NA	NA
YBL084C	mRNA	2.08511	1.81552	2.86653
YBL085W	mRNA	0.855508	0.795633	1.30596
YBL086C	mRNA	NA	0.779811	1.28323
YBL087C	mRNA	NA	NA	NA
YBL088C	mRNA	NA	0.586484	1.32328
YBL089W	mRNA	NA	NA	1.41986
YBL090W	mRNA	NA	1.01793	1.18559
YBL091C	mRNA	0.36557	0.538136	0.640731
YBL092W	mRNA	0.702282	0.578193	NA
YBL093C	mRNA	NA	0.869093	0.997221
YBL097W	mRNA	0.751638	1.30518	2.04463
YBL098W	mRNA	NA	NA	NA
YBL099W	mRNA	NA	0.437142	0.55828
YBL100W-A	transposable_element_gene	0.340906	0.858525	1.04929
YBL100W-B	transposable_element_gene	NA	NA	NA
YBL101C	mRNA	0.560212	0.619658	1.26624
YBL102W	mRNA	0.906069	1.01908	1.678
YBL103C	mRNA	1.42268	1.81858	2.61868
YBL104C	mRNA	0.891073	0.646998	1.55515
YBL105C	mRNA	0.955164	1.43028	1.81431
YBL106C	mRNA	NA	1.23629	1.78955
YBLCdelta7	Ty1	NA	NA	NA
YBLCsigma1	Ty3	NA	1.97459	2.69304
YBLCtau1	Ty4	1.44148	1.51828	2.62209
YBLWdelta1	Ty1	NA	NA	NA
YBLWdelta10	Ty1	NA	NA	NA
YBLWdelta2	Ty2	NA	NA	1.19095
YBLWdelta3	Ty1	NA	NA	NA
YBLWdelta4	Ty2-5'LTR	NA	NA	1.2702
YBLWdelta5	Ty2-3'LTR	-0.504311	0.88623	1.57171
YBLWdelta6	Ty1	NA	NA	NA
YBLWdelta8	Ty1	NA	NA	NA
YBLWdelta9	Ty1	NA	NA	NA
YBLWtau1	Ty4	NA	NA	NA
YBR001C	mRNA	NA	1.25032	1.9588
YBR002C	mRNA	NA	1.64693	1.90828
YBR003W	mRNA	NA	0.704453	1.28954
YBR004C	mRNA	0.971273	1.41452	1.11044
YBR005W	mRNA	NA	1.17987	1.6659
YBR006W	mRNA	NA	NA	NA
YBR007C	mRNA	NA	NA	1.38158
YBR008C	mRNA	NA	NA	1.68008
YBR009C	mRNA	1.5229	1.44472	2.41034
YBR010W	mRNA	3.47067	0.774215	1.64703
YBR011C	mRNA	-0.158684	NA	NA
YBR012W-A	transposable_element_gene	NA	NA	NA
YBR012W-B	transposable_element_gene	0.676769	1.14027	1.87742
YBR013C	mRNA	1.55731	1.79828	2.29847
YBR014C	mRNA	NA	NA	1.1022
YBR015C	mRNA	0.534419	0.861924	0.64754
YBR016W	mRNA	1.24272	1.11092	0.886511
YBR017C	mRNA	0.509244	0.713564	0.545247
YBR020W	mRNA	NA	NA	1.42869
YBR021W	mRNA	NA	NA	1.03949
YBR022W	mRNA	1.24252	NA	1.50626
YBR023C	mRNA	NA	0.681082	0.424947
YBR024W	mRNA	NA	NA	1.42532
YBR025C	mRNA	NA	0.315511	NA
YBR026C	mRNA	NA	NA	0.848209
YBR028C	mRNA	1.92764	0.791019	1.13321
YBR029C	mRNA	NA	1.05874	NA
YBR030W	mRNA	NA	1.14265	1.13919
YBR034C	mRNA	1.91064	1.08858	1.32905
YBR035C	mRNA	0.573961	NA	NA
YBR036C	mRNA	0.743351	1.00134	0.98196
YBR037C	mRNA	NA	1.27369	2.00725
YBR038W	mRNA	0.921652	0.810838	0.986068
YBR039W	mRNA	NA	0.598216	0.772059
YBR040W	mRNA	NA	NA	NA
YBR041W	mRNA	NA	NA	NA
YBR042C	mRNA	NA	NA	0.696694
YBR043C	mRNA	NA	NA	1.39601
YBR044C	mRNA	1.12387	1.1381	2.35103
YBR046C	mRNA	NA	NA	1.29347
YBR047W	mRNA	NA	NA	1.83139
YBR048W	mRNA	NA	NA	NA
YBR049C	mRNA	2.19471	1.13985	1.79627
YBR052C	mRNA	1.22697	NA	1.16019
YBR053C	mRNA	NA	NA	0.715993
YBR054W	mRNA	NA	NA	1.90978
YBR055C	mRNA	0.685036	1.10355	1.28909
YBR056W	mRNA	NA	NA	0.612657
YBR057C	mRNA	1.58111	2.28946	2.4665
YBR058C	mRNA	NA	0.837624	1.60542
YBR059C	mRNA	0.756238	1.00097	1.58244
YBR060C	mRNA	2.04512	0.896041	0.786084
YBR061C	mRNA	1.27544	0.803136	NA
YBR062C	mRNA	NA	NA	NA
YBR065C	mRNA	NA	1.20093	1.29814
YBR066C	mRNA	NA	1.57354	1.4733
YBR067C	mRNA	0.532912	0.486259	1.31864
YBR068C	mRNA	0.926756	1.4084	1.3655
YBR069C	mRNA	NA	0.691795	1.03205
YBR070C	mRNA	1.2215	1.16463	1.60761
YBR071W	mRNA	1.57727	2.1575	1.91705
YBR072W	mRNA	NA	NA	2.51809
YBR073W	mRNA	1.13507	1.37048	1.23419
YBR074W	mRNA	NA	0.618012	0.481428
YBR077C	mRNA	NA	1.75301	1.79077
YBR078W	mRNA	NA	0.620242	0.421577
YBR079C	mRNA	0.444577	0.684487	0.360149
YBR080C	mRNA	NA	NA	0.684867
YBR081C	mRNA	1.28827	1.34655	1.59288
YBR082C	mRNA	NA	NA	NA
YBR083W	mRNA	0.982427	1.74912	1.30899
YBR084C-A	mRNA	NA	NA	NA
YBR084W	mRNA	NA	0.587646	NA
YBR085W	mRNA	1.12773	1.12317	1.32058
YBR086C	mRNA	0.705003	0.850457	0.499932
YBR087W	mRNA	NA	1.01806	NA
YBR088C	mRNA	NA	NA	NA
YBR090C	mRNA	1.5352	NA	2.14323
YBR091C	mRNA	NA	NA	NA
YBR092C	mRNA	1.19002	0.536306	-0.384372
YBR093C	mRNA	NA	0.640712	-0.603293
YBR094W	mRNA	NA	0.763797	1.01163
YBR095C	mRNA	1.20391	NA	1.61219
YBR096W	mRNA	NA	NA	NA
YBR097W	mRNA	NA	1.4636	1.8025
YBR101C	mRNA	0.692975	1.43186	0.889714
YBR102C	mRNA	0.783788	0.983771	1.24542
YBR103W	mRNA	NA	1.21494	1.71638
YBR104W	mRNA	1.00737	1.09161	0.969677
YBR105C	mRNA	1.88251	2.32165	4.09254
YBR106W	mRNA	0.321017	NA	NA
YBR107C	mRNA	NA	NA	1.17325
YBR109C	mRNA	NA	0.906556	0.982386
YBR110W	mRNA	NA	NA	0.929753
YBR111C	mRNA	0.880511	0.983148	1.12606
YBR112C	mRNA	1.59174	0.701982	1.03937
YBR114W	mRNA	NA	0.739181	1.43368
YBR115C	mRNA	0.31349	0.449021	0.664828
YBR119W	mRNA	NA	NA	NA
YBR120C	mRNA	NA	1.9549	NA
YBR121C	mRNA	0.300099	0.460561	NA
YBR122C	mRNA	0.967644	1.2051	1.94154
YBR123C	mRNA	NA	NA	1.50631
YBR125C	mRNA	0.861152	0.923076	1.06365
YBR126C	mRNA	NA	NA	1.00449
YBR127C	mRNA	NA	0.295316	0.251627
YBR128C	mRNA	NA	NA	NA
YBR129C	mRNA	1.78497	1.9821	1.7991
YBR130C	mRNA	NA	1.57058	1.14903
YBR131W	mRNA	1.12888	1.33596	1.70061
YBR132C	mRNA	NA	0.813219	1.95295
YBR133C	mRNA	0.620938	1.01353	1.23361
YBR135W	mRNA	2.3778	1.99	2.30461
YBR136W	mRNA	0.663596	0.946397	1.47665
YBR137W	mRNA	NA	NA	1.10733
YBR138C	mRNA	NA	NA	1.49696
YBR139W	mRNA	NA	NA	0.898987
YBR141C	mRNA	0.370716	0.872085	1.29753
YBR142W	mRNA	NA	NA	NA
YBR143C	mRNA	0.637122	0.843324	0.497126
YBR145W	mRNA	NA	NA	1.59605
YBR146W	mRNA	0.837046	1.07694	1.77958
YBR149W	mRNA	NA	0.562762	0.732428
YBR150C	mRNA	1.53285	1.46166	2.52591
YBR151W	mRNA	0.685621	0.728306	0.995412
YBR152W	mRNA	1.74486	1.76368	2.35844
YBR153W	mRNA	1.45544	1.73693	2.24151
YBR154C	mRNA	0.970054	0.852224	NA
YBR155W	mRNA	0.795236	1.12966	0.803701
YBR156C	mRNA	1.17229	1.56997	1.94683
YBR157C	mRNA	1.33648	1.56162	2.57965
YBR158W	mRNA	2.07714	1.72882	2.15994
YBR159W	mRNA	0.529879	0.542771	NA
YBR160W	mRNA	NA	0.688121	NA
YBR161W	mRNA	NA	1.4584	1.92761
YBR162C	mRNA	2.26316	0.534562	0.641494
YBR162W-A	mRNA	1.32993	1.72588	1.70008
YBR163W	mRNA	2.84331	1.11258	1.16857
YBR164C	mRNA	NA	NA	NA
YBR165W	mRNA	1.15504	1.37665	1.67494
YBR166C	mRNA	NA	NA	0.651632
YBR167C	mRNA	2.01251	2.07758	2.15704
YBR168W	mRNA	1.42907	1.2809	1.37617
YBR169C	mRNA	NA	0.758118	1.70144
YBR170C	mRNA	NA	1.0045	1.31214
YBR171W	mRNA	NA	0.81941	NA
YBR172C	mRNA	1.09586	0.965168	1.31135
YBR173C	mRNA	NA	1.51726	NA
YBR175W	mRNA	1.34927	2.05571	1.96503
YBR176W	mRNA	NA	NA	1.27217
YBR177C	mRNA	NA	0.678103	0.695541
YBR179C	mRNA	NA	1.13665	1.91281
YBR181C	mRNA	-1.00749	NA	NA
YBR182C	mRNA	NA	NA	NA
YBR183W	mRNA	NA	NA	1.58033
YBR185C	mRNA	NA	1.08489	1.51148
YBR187W	mRNA	NA	NA	NA
YBR188C	mRNA	NA	NA	NA
YBR189W	mRNA	NA	NA	NA
YBR191W	mRNA	NA	NA	NA
YBR192W	mRNA	1.03045	1.42506	1.44136
YBR193C	mRNA	NA	2.15194	1.3412
YBR194W	mRNA	NA	2.43844	2.35954
YBR195C	mRNA	NA	NA	0.998252
YBR196C	mRNA	-0.133375	0.198587	-0.0926655
YBR197C	mRNA	NA	1.00601	1.2544
YBR198C	mRNA	1.35849	1.12882	1.47633
YBR199W	mRNA	0.581865	1.34965	1.15128
YBR200W	mRNA	NA	0.922608	1.01046
YBR201W	mRNA	NA	1.79598	1.29497
YBR202W	mRNA	1.98139	0.587767	1.06234
YBR204C	mRNA	NA	1.00494	NA
YBR205W	mRNA	0.52816	0.841216	NA
YBR207W	mRNA	NA	1.08345	1.77695
YBR208C	mRNA	NA	NA	1.08247
YBR210W	mRNA	NA	0.909288	NA
YBR211C	mRNA	1.86402	1.60508	1.24758
YBR212W	mRNA	0.931252	1.33781	1.53533
YBR213W	mRNA	NA	NA	1.32634
YBR214W	mRNA	NA	NA	1.71156
YBR215W	mRNA	0.960612	1.09091	1.45497
YBR216C	mRNA	NA	NA	0.972956
YBR217W	mRNA	1.58017	1.24962	1.71709
YBR218C	mRNA	NA	NA	0.237082
YBR220C	mRNA	0.646927	0.859482	0.849282
YBR221C	mRNA	0.478714	0.522211	0.683935
YBR222C	mRNA	NA	NA	NA
YBR223C	mRNA	1.18019	NA	1.28481
YBR225W	mRNA	1.35229	1.88497	2.91373
YBR227C	mRNA	NA	0.889358	0.972631
YBR228W	mRNA	1.45596	1.52805	2.13523
YBR229C	mRNA	NA	0.520356	0.572885
YBR230C	mRNA	NA	NA	1.11424
YBR231C	mRNA	NA	2.11288	2.54777
YBR233W	mRNA	1.83386	2.02201	1.88359
YBR234C	mRNA	0.519719	0.603143	0.802173
YBR235W	mRNA	0.480998	0.557443	1.62308
YBR236C	mRNA	NA	0.844108	1.38314
YBR237W	mRNA	1.17717	1.48543	1.71838
YBR238C	mRNA	2.00137	1.42356	1.95097
YBR239C	mRNA	NA	NA	1.40234
YBR241C	mRNA	NA	NA	NA
YBR242W	mRNA	1.22723	1.30217	1.32375
YBR243C	mRNA	0.633712	0.803817	NA
YBR244W	mRNA	NA	0.758788	NA
YBR245C	mRNA	0.648752	0.707284	0.743941
YBR246W	mRNA	NA	0.579837	NA
YBR247C	mRNA	1.2607	1.01067	1.25898
YBR248C	mRNA	0.554596	0.742219	1.15069
YBR249C	mRNA	NA	0.43751	-0.296628
YBR251W	mRNA	NA	1.46065	1.60687
YBR252W	mRNA	0.932426	NA	NA
YBR253W	mRNA	1.42637	1.92137	2.13797
YBR254C	mRNA	1.62883	1.85756	1.42352
YBR255W	mRNA	NA	1.3723	1.5844
YBR256C	mRNA	NA	0.695091	0.85441
YBR257W	mRNA	NA	NA	1.35649
YBR258C	mRNA	NA	2.24938	2.49015
YBR259W	mRNA	1.73007	1.83831	2.41605
YBR260C	mRNA	0.685514	NA	1.0322
YBR261C	mRNA	NA	0.831291	0.845773
YBR262C	mRNA	1.429	1.947	2.19486
YBR263W	mRNA	NA	NA	0.300343
YBR264C	mRNA	NA	NA	1.47319
YBR265W	mRNA	1.94084	1.31074	0.77722
YBR267W	mRNA	NA	1.17283	1.24563
YBR268W	mRNA	1.24985	1.72649	1.64679
YBR269C	mRNA	NA	1.20754	1.32952
YBR270C	mRNA	NA	1.02174	1.91778
YBR271W	mRNA	NA	1.03828	1.28838
YBR272C	mRNA	NA	1.24854	1.85968
YBR273C	mRNA	NA	1.12825	NA
YBR274W	mRNA	1.02609	0.904723	1.01125
YBR275C	mRNA	0.53346	0.819564	1.21145
YBR276C	mRNA	1.05557	1.12306	1.60465
YBR278W	mRNA	1.35693	1.62835	1.86777
YBR279W	mRNA	1.39783	1.1249	1.32904
YBR280C	mRNA	NA	NA	1.46729
YBR281C	mRNA	NA	0.850877	0.814049
YBR282W	mRNA	NA	1.68533	1.9193
YBR283C	mRNA	0.390108	0.544775	NA
YBR286W	mRNA	NA	0.32618	0.235875
YBR287W	mRNA	NA	0.989593	0.910342
YBR288C	mRNA	0.632598	1.54775	0.94303
YBR289W	mRNA	NA	1.91669	2.04136
YBR290W	mRNA	0.817547	1.66306	2.01021
YBR291C	mRNA	1.28778	NA	1.01534
YBR293W	mRNA	0.914108	1.04124	1.72756
YBR295W	mRNA	NA	NA	1.98043
YBR296C	mRNA	0.685404	1.6402	1.09763
YBR297W	mRNA	1.65019	NA	1.4537
YBR298C	mRNA	NA	NA	NA
YBRCdelta11	Ty1	NA	NA	NA
YBRCdelta14	Ty1	NA	NA	NA
YBRCdelta18	Ty1	NA	NA	NA
YBRCdelta19	Ty1	NA	NA	2.4138
YBRCtau2	Ty4	NA	NA	NA
YBRWdelta12	Ty1-5'LTR	0.980242	1.87887	1.7152
YBRWdelta13	Ty1-3'LTR	0.676585	0.93652	1.52975
YBRWdelta15	Ty1	2.50805	1.97771	2.65796
YBRWdelta16	Ty1	NA	NA	NA
YBRWdelta17	Ty1	NA	NA	NA
YBRWtau2	Ty4	NA	NA	NA
YCL001W	mRNA	NA	1.0459	NA
YCL002C	mRNA	1.42516	2.02056	1.8783
YCL004W	mRNA	NA	1.22432	1.82341
YCL005W	mRNA	NA	1.2942	1.73266
YCL008C	mRNA	NA	1.11453	0.919369
YCL009C	mRNA	0.422974	0.415821	0.304133
YCL010C	mRNA	0.761195	0.987542	1.39428
YCL011C	mRNA	0.59407	1.02857	0.966426
YCL014W	mRNA	NA	0.535059	1.2051
YCL016C	mRNA	NA	NA	0.893552
YCL017C	mRNA	NA	NA	0.578434
YCL018W	mRNA	NA	NA	NA
YCL019W	transposable_element_gene	0.526285	1.11749	1.05318
YCL020W	transposable_element_gene	NA	NA	NA
YCL024W	mRNA	0.989117	1.08954	1.34136
YCL025C	mRNA	1.7525	NA	1.96677
YCL027W	mRNA	NA	1.60884	NA
YCL028W	mRNA	NA	0.647673	0.459703
YCL029C	mRNA	0.989104	1.17597	1.5472
YCL030C	mRNA	0.36136	0.459292	0.672662
YCL031C	mRNA	1.09463	1.81996	1.40229
YCL032W	mRNA	1.61347	2.19504	2.049
YCL033C	mRNA	NA	NA	NA
YCL034W	mRNA	1.13475	1.79259	2.01935
YCL035C	mRNA	0.648788	0.852054	1.04307
YCL036W	mRNA	NA	1.38231	1.19178
YCL037C	mRNA	0.858371	1.18726	0.694867
YCL038C	mRNA	NA	NA	1.20314
YCL039W	mRNA	NA	NA	1.38664
YCL040W	mRNA	-0.567813	NA	1.17691
YCL043C	mRNA	-0.261652	0.0173544	-0.365196
YCL044C	mRNA	1.01104	0.992385	1.42946
YCL045C	mRNA	NA	0.628864	0.499201
YCL047C	mRNA	NA	NA	NA
YCL049C	mRNA	NA	NA	1.32178
YCL050C	mRNA	NA	0.568921	NA
YCL051W	mRNA	1.61939	1.51775	1.99291
YCL052C	mRNA	0.764136	0.781055	1.10577
YCL054W	mRNA	1.41625	1.44481	1.53564
YCL055W	mRNA	NA	1.62123	0.986607
YCL056C	mRNA	1.58634	1.35477	1.62413
YCL057W	mRNA	0.617985	0.681992	0.879207
YCL059C	mRNA	1.01978	1.29301	0.95841
YCL061C	mRNA	1.15664	1.71158	1.73168
YCL063W	mRNA	3.26458	1.53324	2.04092
YCL064C	mRNA	NA	0.734398	0.692121
YCLCdelta1	Ty1	NA	NA	NA
YCLWdelta2a	Ty1	NA	NA	NA
YCLWdelta2b	Ty1	NA	NA	NA
YCLWdelta3	Ty1	NA	NA	NA
YCLWdelta4	Ty2-5'LTR	NA	NA	NA
YCLWdelta5	Ty2-3'LTR	NA	NA	1.3105
YCLWomega1	Ty5	NA	NA	NA
YCLWomega2	Ty5	NA	NA	NA
YCR002C	mRNA	NA	0.758392	0.697342
YCR003W	mRNA	NA	1.62237	1.54394
YCR004C	mRNA	1.27075	0.549947	0.900604
YCR005C	mRNA	NA	1.34725	2.459
YCR007C	mRNA	NA	NA	2.06906
YCR008W	mRNA	1.2414	1.14879	1.07077
YCR009C	mRNA	NA	1.1945	0.945326
YCR011C	mRNA	NA	0.442646	0.744194
YCR012W	mRNA	-0.267767	0.119915	-0.138448
YCR015C	mRNA	0.964321	1.71744	2.23498
YCR016W	mRNA	NA	NA	1.00603
YCR017C	mRNA	NA	0.440675	0.55785
YCR019W	mRNA	NA	NA	NA
YCR020C	mRNA	NA	NA	NA
YCR020C-A	mRNA	1.17506	1.24538	1.65358
YCR021C	mRNA	NA	NA	NA
YCR023C	mRNA	0.882235	1.37938	1.8096
YCR024C	mRNA	NA	NA	1.7121
YCR024C-A	mRNA	1.14568	1.10195	1.37781
YCR026C	mRNA	NA	1.3391	1.91839
YCR027C	mRNA	NA	NA	0.754822
YCR028C	mRNA	NA	NA	0.597435
YCR030C	mRNA	NA	0.647046	1.03553
YCR031C	mRNA	NA	NA	NA
YCR033W	mRNA	0.689115	0.727175	1.36082
YCR034W	mRNA	0.514419	0.511848	NA
YCR035C	mRNA	1.36512	1.47423	1.34979
YCR036W	mRNA	NA	NA	1.31597
YCR037C	mRNA	0.71366	0.752045	1.51361
YCR038C	mRNA	2.23679	2.32641	3.25431
YCR042C	mRNA	0.660789	1.49485	1.56732
YCR043C	mRNA	0.846604	1.02918	0.806549
YCR044C	mRNA	NA	NA	NA
YCR047C	mRNA	1.13318	1.37656	1.91383
YCR048W	mRNA	NA	0.554985	1.26088
YCR051W	mRNA	NA	NA	0.814489
YCR052W	mRNA	0.633274	0.822826	1.1725
YCR053W	mRNA	NA	0.394548	-0.342362
YCR054C	mRNA	NA	NA	NA
YCR059C	mRNA	0.972548	1.05297	1.01301
YCR060W	mRNA	NA	NA	NA
YCR061W	mRNA	NA	NA	0.970244
YCR063W	mRNA	NA	1.32711	1.89869
YCR065W	mRNA	1.57738	1.51876	2.3299
YCR066W	mRNA	2.16116	2.02038	2.56861
YCR067C	mRNA	NA	0.404526	0.593187
YCR068W	mRNA	NA	NA	0.91052
YCR069W	mRNA	NA	0.868538	1.32891
YCR071C	mRNA	1.99973	2.24982	2.07573
YCR072C	mRNA	0.853659	0.868895	1.01025
YCR073C	mRNA	1.12631	0.964249	1.7546
YCR075C	mRNA	NA	1.19234	1.25187
YCR076C	mRNA	3.56879	2.7565	2.34953
YCR077C	mRNA	0.869998	1.23835	0.949462
YCR079W	mRNA	1.54055	1.07113	1.93809
YCR081W	mRNA	1.14082	1.32695	1.96568
YCR082W	mRNA	1.39757	1.83689	1.56283
YCR083W	mRNA	2.06838	1.81404	1.8198
YCR084C	mRNA	0.820267	0.778375	0.53537
YCR086W	mRNA	NA	NA	NA
YCR088W	mRNA	NA	0.317103	0.487599
YCR089W	mRNA	NA	0.791925	0.882615
YCR090C	mRNA	1.35144	1.8554	1.24115
YCR091W	mRNA	NA	NA	2.07021
YCR092C	mRNA	NA	0.637959	0.835426
YCR093W	mRNA	0.30999	0.945136	1.18402
YCR094W	mRNA	NA	0.841601	0.996277
YCR095C	mRNA	NA	NA	1.73058
YCR098C	mRNA	NA	NA	NA
YCR101C	mRNA	NA	NA	2.2241
YCR106W	mRNA	NA	NA	0.857867
YCRCdelta14	Ty1	NA	NA	NA
YCRCdelta6	Ty1	NA	NA	NA
YCRCdelta7	Ty1	NA	NA	NA
YCRCtau1	Ty4	NA	NA	NA
YCRWdelta10	Ty1	NA	NA	NA
YCRWdelta11	Ty1	NA	2.69156	NA
YCRWdelta12	Ty1	NA	NA	NA
YCRWdelta13	Ty1	NA	NA	NA
YCRWdelta8	Ty1	NA	NA	NA
YCRWdelta9	Ty1	NA	NA	NA
YCRWomega3	Ty5	NA	NA	NA
YDL001W	mRNA	NA	1.21057	1.27601
YDL002C	mRNA	3.29722	1.84348	2.26022
YDL003W	mRNA	1.02162	1.67275	1.75833
YDL004W	mRNA	0.735554	1.17343	0.805346
YDL005C	mRNA	0.959739	1.52616	1.55831
YDL006W	mRNA	NA	1.62114	1.61966
YDL007W	mRNA	NA	0.573251	0.439567
YDL008W	mRNA	NA	2.37409	2.01641
YDL010W	mRNA	NA	1.28453	1.49061
YDL012C	mRNA	1.21793	1.6521	1.44888
YDL013W	mRNA	0.899178	1.79665	2.08574
YDL014W	mRNA	1.11316	0.766897	0.218194
YDL015C	mRNA	NA	0.504346	NA
YDL017W	mRNA	NA	1.90136	2.25139
YDL018C	mRNA	NA	1.01557	1.23394
YDL019C	mRNA	0.608711	0.940128	1.70313
YDL020C	mRNA	0.846339	1.20515	1.97386
YDL021W	mRNA	NA	NA	1.91485
YDL022W	mRNA	NA	0.554738	1.08853
YDL025C	mRNA	-0.935034	NA	NA
YDL027C	mRNA	NA	1.25195	1.51674
YDL028C	mRNA	NA	1.08056	1.56996
YDL029W	mRNA	NA	0.453605	NA
YDL030W	mRNA	1.47439	1.52207	1.48346
YDL031W	mRNA	0.870523	1.22121	1.3059
YDL033C	mRNA	0.961613	0.892758	2.09331
YDL035C	mRNA	0.971409	1.3533	1.89761
YDL036C	mRNA	NA	1.03796	0.871827
YDL037C	mRNA	1.23216	NA	2.19948
YDL040C	mRNA	NA	0.55453	0.690126
YDL042C	mRNA	1.02721	1.32706	1.40507
YDL043C	mRNA	NA	1.18856	1.105
YDL044C	mRNA	1.20978	1.5305	2.32702
YDL045C	mRNA	NA	1.23373	1.35626
YDL045W-A	mRNA	1.27138	2.37643	2.51952
YDL046W	mRNA	1.34776	0.892139	0.981992
YDL047W	mRNA	0.842891	1.06451	1.03798
YDL048C	mRNA	NA	NA	2.76997
YDL049C	mRNA	NA	1.84424	1.67325
YDL051W	mRNA	0.539511	0.686459	NA
YDL052C	mRNA	NA	NA	NA
YDL053C	mRNA	1.30462	1.5544	2.00957
YDL054C	mRNA	NA	NA	NA
YDL055C	mRNA	1.01284	0.761076	0.65705
YDL056W	mRNA	0.849059	1.43081	1.6935
YDL057W	mRNA	NA	NA	NA
YDL058W	mRNA	0.607094	0.869223	1.29221
YDL059C	mRNA	NA	NA	NA
YDL060W	mRNA	0.590069	0.970953	0.744249
YDL061C	mRNA	1.89988	1.25932	1.53764
YDL063C	mRNA	NA	0.977988	0.671607
YDL064W	mRNA	NA	NA	NA
YDL065C	mRNA	NA	1.48143	1.17572
YDL066W	mRNA	NA	0.324279	0.508917
YDL067C	mRNA	1.51053	1.61293	1.69909
YDL069C	mRNA	1.45197	2.593	1.92759
YDL070W	mRNA	3.91502	1.19831	2.04415
YDL072C	mRNA	NA	0.741781	0.986987
YDL073W	mRNA	1.53804	1.12952	1.32016
YDL074C	mRNA	1.78118	1.43727	1.78718
YDL075W	mRNA	0.669441	0.896176	NA
YDL076C	mRNA	1.44706	1.2807	1.16636
YDL077C	mRNA	NA	1.00696	1.01889
YDL078C	mRNA	NA	NA	NA
YDL080C	mRNA	NA	NA	1.34057
YDL081C	mRNA	0.252656	0.610568	0.24502
YDL082W	mRNA	NA	NA	NA
YDL083C	mRNA	NA	NA	NA
YDL084W	mRNA	0.310016	0.594341	0.270288
YDL086W	mRNA	0.835087	1.09012	1.07295
YDL087C	mRNA	NA	1.10868	1.49018
YDL088C	mRNA	1.16128	1.48911	1.9014
YDL089W	mRNA	NA	NA	NA
YDL090C	mRNA	NA	1.03633	1.22493
YDL092W	mRNA	1.14137	1.6627	1.37978
YDL093W	mRNA	NA	0.78046	0.878008
YDL095W	mRNA	NA	NA	NA
YDL097C	mRNA	0.484746	0.844105	1.02892
YDL098C	mRNA	1.82365	1.71396	2.11104
YDL099W	mRNA	1.04223	1.43355	1.32712
YDL100C	mRNA	NA	0.507945	NA
YDL101C	mRNA	NA	1.05074	1.08714
YDL102W	mRNA	NA	0.637357	0.97088
YDL103C	mRNA	NA	0.767522	0.525969
YDL104C	mRNA	NA	2.03597	1.74549
YDL105W	mRNA	1.92508	2.30624	2.53315
YDL106C	mRNA	NA	1.44623	1.45185
YDL107W	mRNA	NA	2.94712	3.16527
YDL108W	mRNA	1.18608	1.61428	1.3837
YDL109C	mRNA	NA	1.34919	1.11967
YDL110C	mRNA	NA	1.1517	2.15788
YDL111C	mRNA	NA	1.34648	0.822868
YDL112W	mRNA	0.515777	0.84976	0.782193
YDL113C	mRNA	NA	1.53673	2.25815
YDL115C	mRNA	0.836661	1.17595	1.65551
YDL116W	mRNA	NA	1.11639	1.3128
YDL117W	mRNA	0.775856	1.25077	1.8748
YDL119C	mRNA	NA	1.48516	1.63778
YDL120W	mRNA	1.69012	1.72669	1.47225
YDL121C	mRNA	NA	1.04696	NA
YDL122W	mRNA	0.683345	1.09394	1.13218
YDL123W	mRNA	NA	1.10834	1.49479
YDL124W	mRNA	0.498156	0.698718	1.30736
YDL125C	mRNA	NA	1.63627	1.31801
YDL126C	mRNA	NA	0.244328	0.366747
YDL127W	mRNA	NA	1.31246	1.72329
YDL128W	mRNA	NA	0.565168	0.754453
YDL129W	mRNA	1.84947	1.50063	1.75946
YDL130W	mRNA	NA	0.769169	NA
YDL131W	mRNA	NA	NA	NA
YDL132W	mRNA	0.505483	1.13807	1.32469
YDL133C-A	mRNA	0.903316	1.0081	1.26159
YDL133W	mRNA	NA	1.34386	2.23627
YDL135C	mRNA	0.823337	1.00218	0.745217
YDL136W	mRNA	NA	NA	NA
YDL137W	mRNA	0.513239	0.480988	1.07701
YDL138W	mRNA	NA	1.23138	1.80864
YDL141W	mRNA	1.39817	0.732842	0.725662
YDL142C	mRNA	NA	1.43529	1.23194
YDL143W	mRNA	0.372603	0.632486	NA
YDL144C	mRNA	NA	NA	0.790157
YDL145C	mRNA	0.36655	0.71105	0.68752
YDL147W	mRNA	NA	0.972415	1.13095
YDL148C	mRNA	0.971078	1.22529	0.949378
YDL149W	mRNA	1.01348	1.06048	2.4163
YDL150W	mRNA	NA	1.28034	0.661077
YDL153C	mRNA	1.01718	1.31233	1.09878
YDL155W	mRNA	0.823924	1.31734	1.89867
YDL156W	mRNA	NA	NA	0.966113
YDL157C	mRNA	1.27457	1.28867	1.15061
YDL159W	mRNA	2.22185	0.940618	1.65755
YDL160C	mRNA	1.76016	NA	1.14104
YDL161W	mRNA	0.830051	1.20218	1.30774
YDL164C	mRNA	NA	0.649272	0.616335
YDL165W	mRNA	NA	1.02985	NA
YDL166C	mRNA	NA	1.11127	1.46374
YDL167C	mRNA	1.36022	1.14334	0.899616
YDL168W	mRNA	NA	NA	NA
YDL170W	mRNA	0.965892	1.50283	1.97292
YDL171C	mRNA	0.384409	0.298069	NA
YDL173W	mRNA	1.0204	1.23535	1.35339
YDL174C	mRNA	0.7493	0.915288	1.74797
YDL175C	mRNA	NA	1.24992	1.52636
YDL176W	mRNA	1.44434	1.82494	2.16929
YDL177C	mRNA	3.12817	2.6465	3.32877
YDL178W	mRNA	NA	NA	0.615917
YDL179W	mRNA	1.38391	1.18893	1.63308
YDL180W	mRNA	1.28468	1.24193	1.51856
YDL181W	mRNA	NA	NA	1.39553
YDL183C	mRNA	NA	2.18701	3.69947
YDL184C	mRNA	0.845987	0.883451	1.27311
YDL185W	mRNA	NA	0.243016	0.288045
YDL188C	mRNA	NA	0.769153	0.575655
YDL189W	mRNA	1.01878	1.92927	1.77133
YDL190C	mRNA	NA	0.476275	0.872239
YDL191W	mRNA	NA	NA	NA
YDL192W	mRNA	0.351774	0.740682	1.33492
YDL193W	mRNA	NA	0.718716	NA
YDL195W	mRNA	NA	0.464728	0.338507
YDL197C	mRNA	1.39652	1.67963	2.57744
YDL198C	mRNA	1.20575	NA	0.837655
YDL199C	mRNA	NA	NA	1.62854
YDL201W	mRNA	1.23392	1.10807	0.642377
YDL202W	mRNA	NA	1.52127	1.74334
YDL203C	mRNA	1.37977	1.17283	1.64463
YDL204W	mRNA	NA	NA	1.83914
YDL205C	mRNA	0.633285	0.633975	0.676365
YDL206W	mRNA	1.93708	1.56087	2.73324
YDL207W	mRNA	0.665836	1.61542	1.72972
YDL208W	mRNA	1.27994	1.21619	0.734024
YDL209C	mRNA	NA	1.42768	1.87788
YDL211C	mRNA	1.67712	1.78724	2.01053
YDL212W	mRNA	NA	NA	NA
YDL213C	mRNA	1.23375	1.75992	1.55726
YDL215C	mRNA	NA	1.56636	3.31501
YDL216C	mRNA	1.15961	1.09974	1.54099
YDL217C	mRNA	0.744896	1.47796	1.62562
YDL219W	mRNA	NA	NA	2.36661
YDL220C	mRNA	0.870486	1.28174	1.40063
YDL224C	mRNA	0.971853	1.60393	2.00243
YDL225W	mRNA	0.753292	0.730675	1.13458
YDL226C	mRNA	0.474646	NA	0.594143
YDL227C	mRNA	2.80033	0.967226	1.34919
YDL230W	mRNA	NA	1.89498	1.92899
YDL231C	mRNA	NA	0.750937	1.15984
YDL232W	mRNA	2.32545	2.25777	2.13927
YDL233W	mRNA	NA	1.36229	1.91815
YDL234C	mRNA	NA	1.55196	2.39955
YDL235C	mRNA	0.946036	1.20696	1.10623
YDL236W	mRNA	0.606907	0.553224	0.626333
YDL237W	mRNA	NA	NA	0.600723
YDL238C	mRNA	NA	NA	1.63904
YDL240W	mRNA	4.44889	1.98789	2.41684
YDL241W	mRNA	1.10093	NA	1.61499
YDLCdelta1	Ty1	2.83452	NA	NA
YDLWtau1	Ty4	NA	NA	NA
YDR001C	mRNA	NA	0.507659	1.65464
YDR002W	mRNA	NA	0.505507	0.426501
YDR003W	mRNA	1.20468	NA	1.68548
YDR004W	mRNA	1.7998	1.49597	1.64957
YDR005C	mRNA	NA	NA	1.7211
YDR006C	mRNA	0.943055	1.45597	2.37355
YDR007W	mRNA	1.00169	0.80092	1.72587
YDR011W	mRNA	NA	0.596757	1.25357
YDR013W	mRNA	NA	2.0874	1.68573
YDR014W	mRNA	NA	1.11138	1.61566
YDR016C	mRNA	3.40178	1.21027	1.82366
YDR017C	mRNA	0.736979	1.16767	1.76783
YDR020C	mRNA	1.30205	1.74988	1.67374
YDR021W	mRNA	NA	1.29309	1.52532
YDR022C	mRNA	NA	NA	2.46191
YDR023W	mRNA	NA	0.326609	-0.22833
YDR025W	mRNA	0.690291	0.986234	NA
YDR026C	mRNA	1.17656	1.77026	1.91717
YDR027C	mRNA	0.733058	0.976136	1.18241
YDR028C	mRNA	0.656347	1.13296	1.55798
YDR030C	mRNA	NA	NA	2.05942
YDR031W	mRNA	NA	2.45205	3.10386
YDR032C	mRNA	NA	0.57182	0.76502
YDR033W	mRNA	1.50473	0.431737	1.31763
YDR034C	mRNA	2.04472	0.997695	1.78266
YDR034C-C	transposable_element_gene	NA	NA	NA
YDR034C-D	transposable_element_gene	0.938731	1.30644	1.32145
YDR035W	mRNA	1.81332	0.794105	0.810328
YDR036C	mRNA	NA	NA	NA
YDR037W	mRNA	0.343874	0.248285	NA
YDR041W	mRNA	1.6781	1.58988	2.57367
YDR042C	mRNA	NA	NA	1.5015
YDR043C	mRNA	NA	NA	1.67466
YDR044W	mRNA	NA	NA	0.569365
YDR045C	mRNA	1.27419	1.69071	1.2183
YDR046C	mRNA	0.514955	0.838383	1.20689
YDR047W	mRNA	0.931036	1.19854	1.49852
YDR049W	mRNA	0.896344	1.32499	1.8666
YDR050C	mRNA	-0.203397	NA	-0.280479
YDR051C	mRNA	0.864847	1.6591	1.07715
YDR052C	mRNA	1.26932	1.70624	2.11908
YDR054C	mRNA	0.760148	1.48115	1.45918
YDR055W	mRNA	NA	0.953411	1.11176
YDR056C	mRNA	NA	1.09905	0.872624
YDR057W	mRNA	NA	0.771734	0.969526
YDR058C	mRNA	NA	NA	NA
YDR059C	mRNA	NA	NA	NA
YDR060W	mRNA	0.531002	0.442916	0.709055
YDR061W	mRNA	0.63959	1.04014	1.86746
YDR062W	mRNA	NA	0.710441	NA
YDR063W	mRNA	0.982716	1.0727	1.13932
YDR064W	mRNA	0.784675	0.629882	0.667074
YDR065W	mRNA	1.26707	NA	1.93824
YDR067C	mRNA	NA	NA	NA
YDR068W	mRNA	NA	1.62986	0.989546
YDR069C	mRNA	NA	0.836169	1.24518
YDR070C	mRNA	NA	NA	3.04581
YDR071C	mRNA	NA	1.1572	0.896275
YDR072C	mRNA	0.893684	1.28011	2.21079
YDR073W	mRNA	1.46963	1.23284	2.0507
YDR074W	mRNA	NA	NA	1.42125
YDR075W	mRNA	2.35311	1.07178	1.50928
YDR076W	mRNA	NA	1.12212	1.53938
YDR077W	mRNA	0.782668	1.0322	1.01146
YDR078C	mRNA	1.86467	1.87668	2.60302
YDR079W	mRNA	1.94385	1.85381	NA
YDR080W	mRNA	NA	0.896414	1.49401
YDR081C	mRNA	NA	0.883731	1.33178
YDR082W	mRNA	NA	NA	1.52376
YDR083W	mRNA	1.39207	1.01358	0.989123
YDR084C	mRNA	NA	NA	NA
YDR085C	mRNA	NA	1.88873	2.33457
YDR086C	mRNA	1.10927	1.05899	0.935672
YDR087C	mRNA	0.969999	1.1142	NA
YDR088C	mRNA	NA	NA	1.2988
YDR089W	mRNA	NA	1.08172	1.67147
YDR090C	mRNA	1.32064	1.46159	2.28333
YDR091C	mRNA	0.960297	1.073	0.363361
YDR092W	mRNA	NA	1.78846	NA
YDR093W	mRNA	0.375883	0.593868	0.637287
YDR097C	mRNA	0.65252	0.909056	1.10022
YDR098C	mRNA	NA	NA	NA
YDR098C-A	transposable_element_gene	NA	NA	1.18106
YDR098C-B	transposable_element_gene	NA	NA	NA
YDR099W	mRNA	0.705275	1.09333	0.767766
YDR100W	mRNA	NA	NA	0.742095
YDR101C	mRNA	0.665274	0.907448	NA
YDR103W	mRNA	NA	NA	1.30131
YDR104C	mRNA	NA	1.36981	2.46661
YDR105C	mRNA	NA	1.22319	1.41445
YDR107C	mRNA	NA	NA	0.662061
YDR108W	mRNA	NA	1.40065	1.5913
YDR109C	mRNA	0.921532	1.27503	1.88509
YDR110W	mRNA	1.84345	1.12309	1.6095
YDR111C	mRNA	0.767041	NA	NA
YDR113C	mRNA	1.61022	2.11373	2.41518
YDR115W	mRNA	2.11899	1.58648	1.81192
YDR116C	mRNA	NA	1.44033	1.76897
YDR117C	mRNA	NA	0.76026	0.785262
YDR118W	mRNA	NA	NA	1.27991
YDR119W	mRNA	0.40616	0.997589	0.887673
YDR120C	mRNA	1.20341	0.843638	0.944113
YDR121W	mRNA	NA	1.36716	1.00859
YDR122W	mRNA	0.777181	1.45739	2.08023
YDR123C	mRNA	1.51856	2.24843	2.66007
YDR125C	mRNA	NA	NA	1.56629
YDR126W	mRNA	NA	NA	1.84702
YDR127W	mRNA	NA	0.316942	0.923642
YDR128W	mRNA	NA	0.974739	1.76598
YDR129C	mRNA	NA	NA	NA
YDR130C	mRNA	NA	1.00027	1.64261
YDR131C	mRNA	NA	1.54952	1.32423
YDR132C	mRNA	NA	1.82432	1.74548
YDR134C	pseudogene	1.6537	1.07525	1.24923
YDR135C	mRNA	-0.259994	0.319064	0.642082
YDR137W	mRNA	NA	1.09086	1.43053
YDR138W	mRNA	NA	0.931521	1.36614
YDR139C	mRNA	NA	NA	NA
YDR140W	mRNA	NA	1.06749	1.12277
YDR141C	mRNA	NA	0.93518	1.15683
YDR142C	mRNA	NA	1.26517	1.86983
YDR143C	mRNA	1.21288	1.23522	1.19444
YDR144C	mRNA	NA	0.491299	NA
YDR145W	mRNA	1.32024	1.58346	1.56493
YDR146C	mRNA	NA	1.036	1.31643
YDR147W	mRNA	0.973445	1.54773	1.95767
YDR148C	mRNA	NA	NA	NA
YDR150W	mRNA	NA	1.59189	2.12202
YDR151C	mRNA	NA	1.13297	1.50952
YDR152W	mRNA	1.1362	1.46658	1.45199
YDR153C	mRNA	NA	1.289	1.3267
YDR155C	mRNA	0.341801	NA	NA
YDR156W	mRNA	NA	1.18818	NA
YDR158W	mRNA	0.297673	0.345296	NA
YDR159W	mRNA	1.08272	0.957046	1.58297
YDR160W	mRNA	0.886522	NA	1.0908
YDR161W	mRNA	NA	NA	NA
YDR162C	mRNA	NA	NA	1.17345
YDR163W	mRNA	NA	2.27129	NA
YDR164C	mRNA	NA	0.559275	1.06753
YDR165W	mRNA	0.794148	0.971645	NA
YDR166C	mRNA	1.16531	1.4397	1.49041
YDR167W	mRNA	1.06241	1.97296	1.06551
YDR168W	mRNA	0.662994	NA	0.755751
YDR169C	mRNA	0.718254	0.645393	1.41579
YDR170C	mRNA	0.994534	1.47375	1.63285
YDR170W-A	transposable_element_gene	NA	1.06451	1.96305
YDR171W	mRNA	NA	NA	1.50816
YDR172W	mRNA	0.557579	0.850154	0.46644
YDR173C	mRNA	NA	NA	1.42754
YDR174W	mRNA	2.26058	0.701475	0.576958
YDR175C	mRNA	NA	1.40823	1.88156
YDR176W	mRNA	0.795821	1.50787	1.96584
YDR177W	mRNA	NA	NA	0.77801
YDR178W	mRNA	NA	NA	NA
YDR179C	mRNA	NA	2.00765	2.47755
YDR179W-A	mRNA	1.90364	2.11913	1.55588
YDR180W	mRNA	0.584483	0.953292	0.949066
YDR181C	mRNA	NA	NA	1.43249
YDR182W	mRNA	NA	0.712216	1.01629
YDR183W	mRNA	NA	2.56029	2.16516
YDR184C	mRNA	0.93298	1.16506	1.22876
YDR185C	mRNA	NA	NA	2.01889
YDR186C	mRNA	0.76399	1.07949	1.81121
YDR188W	mRNA	0.729062	0.634925	0.883158
YDR189W	mRNA	0.571875	0.720057	0.830221
YDR190C	mRNA	0.775894	0.619167	0.645286
YDR191W	mRNA	NA	1.70895	2.49937
YDR192C	mRNA	NA	1.15664	1.46388
YDR194C	mRNA	1.14863	1.41635	1.83556
YDR195W	mRNA	1.72674	1.24795	1.93151
YDR196C	mRNA	NA	1.29385	1.2157
YDR197W	mRNA	NA	1.31678	1.83352
YDR198C	mRNA	1.14635	NA	1.13636
YDR200C	mRNA	2.05089	2.51308	2.6353
YDR201W	mRNA	2.14041	NA	1.21425
YDR202C	mRNA	NA	0.953743	1.23511
YDR204W	mRNA	NA	0.841548	0.782072
YDR205W	mRNA	0.765888	0.906362	1.63173
YDR206W	mRNA	0.649901	0.502326	1.49723
YDR207C	mRNA	1.32505	1.37623	1.49571
YDR208W	mRNA	0.710794	1.15234	1.91787
YDR210C-C	transposable_element_gene	NA	NA	1.20231
YDR210C-D	transposable_element_gene	NA	NA	NA
YDR210W	mRNA	1.48122	1.37523	1.50797
YDR210W-A	transposable_element_gene	NA	NA	NA
YDR210W-B	transposable_element_gene	NA	0.906948	1.25025
YDR211W	mRNA	0.389903	0.886943	0.765365
YDR212W	mRNA	NA	0.574136	-0.387792
YDR213W	mRNA	1.32458	1.03016	1.44602
YDR214W	mRNA	NA	0.69477	NA
YDR217C	mRNA	0.88554	1.21541	1.9947
YDR219C	mRNA	1.23669	1.86187	2.4748
YDR221W	mRNA	NA	0.854282	1.14908
YDR222W	mRNA	1.86383	1.74635	1.66877
YDR224C	mRNA	2.35868	1.56422	1.69123
YDR225W	mRNA	2.59399	1.2864	1.55697
YDR226W	mRNA	0.442294	0.436685	NA
YDR227W	mRNA	1.04896	1.28936	2.00804
YDR228C	mRNA	0.975668	1.35014	1.55198
YDR229W	mRNA	NA	1.05163	1.6564
YDR231C	mRNA	NA	NA	NA
YDR232W	mRNA	1.21057	0.710356	0.905516
YDR233C	mRNA	NA	0.385994	-0.271399
YDR235W	mRNA	NA	1.08553	1.64584
YDR236C	mRNA	NA	1.27611	1.54416
YDR237W	mRNA	NA	1.28647	1.72225
YDR238C	mRNA	0.288328	0.54557	0.71548
YDR239C	mRNA	NA	0.86058	1.50984
YDR240C	mRNA	1.38083	1.36567	1.61417
YDR242W	mRNA	NA	NA	2.45854
YDR243C	mRNA	NA	NA	1.17224
YDR244W	mRNA	NA	1.22258	1.8936
YDR245W	mRNA	NA	0.857157	0.848261
YDR246W	mRNA	1.25695	1.71047	1.3224
YDR247W	mRNA	1.63381	1.1407	1.49183
YDR248C	mRNA	NA	NA	NA
YDR249C	mRNA	NA	1.5467	2.19197
YDR251W	mRNA	0.729649	1.03323	1.22972
YDR252W	mRNA	NA	1.52443	1.80749
YDR253C	mRNA	NA	NA	NA
YDR254W	mRNA	NA	1.63884	2.0574
YDR255C	mRNA	1.11558	NA	1.90717
YDR256C	mRNA	NA	NA	NA
YDR257C	mRNA	0.815965	1.11811	1.22932
YDR258C	mRNA	NA	NA	1.79277
YDR260C	mRNA	1.20297	1.38941	1.40897
YDR261C	mRNA	0.565068	0.657488	0.717891
YDR261C-C	transposable_element_gene	NA	NA	NA
YDR261C-D	transposable_element_gene	NA	NA	NA
YDR261W-A	transposable_element_gene	NA	NA	NA
YDR261W-B	transposable_element_gene	0.550261	0.896698	1.61088
YDR262W	mRNA	1.42364	1.39369	2.03405
YDR263C	mRNA	1.43045	1.4778	1.92608
YDR264C	mRNA	NA	0.41614	1.34713
YDR265W	mRNA	1.25021	1.77923	2.59289
YDR266C	mRNA	NA	0.676213	0.667763
YDR267C	mRNA	1.16667	0.919092	1.19636
YDR268W	mRNA	1.4158	1.36479	2.06937
YDR270W	mRNA	0.788527	1.22722	2.98497
YDR272W	mRNA	NA	NA	NA
YDR273W	mRNA	NA	2.76074	3.49386
YDR276C	mRNA	2.01294	1.46923	1.85055
YDR277C	mRNA	3.59241	NA	2.08385
YDR279W	mRNA	1.2147	1.04698	NA
YDR280W	mRNA	1.2831	0.730942	0.759169
YDR281C	mRNA	3.38618	2.68516	3.64268
YDR282C	mRNA	NA	NA	1.88805
YDR283C	mRNA	NA	NA	NA
YDR284C	mRNA	NA	0.605438	0.922976
YDR286C	mRNA	NA	1.78686	1.87833
YDR287W	mRNA	NA	1.86317	1.71143
YDR288W	mRNA	1.16552	1.32474	2.25622
YDR289C	mRNA	NA	1.37436	1.28332
YDR291W	mRNA	NA	0.788827	1.23326
YDR292C	mRNA	NA	0.586129	0.669082
YDR294C	mRNA	NA	0.641534	NA
YDR295C	mRNA	NA	1.78491	1.90879
YDR296W	mRNA	NA	1.28655	1.35779
YDR297W	mRNA	0.937892	1.18875	NA
YDR298C	mRNA	NA	0.85688	0.816571
YDR299W	mRNA	NA	2.06081	1.82393
YDR300C	mRNA	NA	1.07477	0.540227
YDR301W	mRNA	1.93153	0.797226	1.2613
YDR302W	mRNA	NA	1.61053	NA
YDR303C	mRNA	1.45046	1.12434	1.5953
YDR304C	mRNA	NA	NA	NA
YDR305C	mRNA	NA	NA	1.7753
YDR306C	mRNA	NA	0.882755	1.75217
YDR307W	mRNA	NA	NA	0.741884
YDR308C	mRNA	1.10239	1.12028	1.50106
YDR309C	mRNA	1.35606	1.76421	1.99753
YDR310C	mRNA	0.7687	0.871652	1.14785
YDR311W	mRNA	1.42973	1.86498	1.69344
YDR312W	mRNA	NA	1.28027	1.08358
YDR313C	mRNA	1.59629	1.37348	1.86698
YDR314C	mRNA	1.14519	1.37675	1.94956
YDR315C	mRNA	2.13523	NA	2.60791
YDR316W	mRNA	1.53854	1.41014	2.07962
YDR316W-A	transposable_element_gene	NA	NA	NA
YDR316W-B	transposable_element_gene	NA	NA	NA
YDR318W	mRNA	NA	1.35902	1.69644
YDR319C	mRNA	NA	NA	NA
YDR320C	mRNA	NA	0.577062	1.09984
YDR321W	mRNA	NA	0.387203	NA
YDR322W	mRNA	NA	1.368	1.42824
YDR323C	mRNA	NA	1.39246	1.81278
YDR324C	mRNA	0.968106	1.00963	0.710213
YDR325W	mRNA	0.989949	1.13974	1.42345
YDR326C	mRNA	0.831901	0.94745	1.46627
YDR328C	mRNA	NA	0.588029	0.65776
YDR329C	mRNA	1.20849	1.48004	2.01045
YDR330W	mRNA	0.931597	0.940264	1.68793
YDR331W	mRNA	0.817123	0.99969	1.27839
YDR332W	mRNA	NA	1.2355	1.76452
YDR333C	mRNA	NA	0.9503	1.63908
YDR334W	mRNA	2.44861	0.661006	1.48962
YDR335W	mRNA	0.624497	0.60371	1.39533
YDR336W	mRNA	2.73032	2.57727	3.00716
YDR337W	mRNA	1.00748	1.40248	2.16231
YDR338C	mRNA	NA	1.18157	1.49066
YDR339C	mRNA	NA	1.4851	1.17968
YDR341C	mRNA	NA	0.249047	-0.319924
YDR345C	mRNA	NA	0.426277	1.15248
YDR346C	mRNA	1.20261	0.979083	1.13347
YDR347W	mRNA	NA	NA	1.18706
YDR348C	mRNA	0.876899	1.41749	1.46391
YDR349C	mRNA	NA	0.665542	0.831186
YDR350C	mRNA	0.98341	1.20773	1.9023
YDR351W	mRNA	2.06431	1.75854	2.23464
YDR352W	mRNA	NA	1.00689	0.987674
YDR353W	mRNA	0.40091	0.62435	NA
YDR354W	mRNA	NA	0.737303	NA
YDR356W	mRNA	1.14625	1.21922	1.61133
YDR357C	mRNA	NA	1.71033	1.62899
YDR358W	mRNA	NA	1.23912	2.06804
YDR359C	mRNA	0.726762	1.00869	1.4023
YDR361C	mRNA	0.686534	0.741281	0.885585
YDR362C	mRNA	1.20273	1.11611	2.07421
YDR363W	mRNA	0.977186	1.46848	2.09071
YDR364C	mRNA	NA	1.18146	1.95376
YDR365C	mRNA	1.33106	1.39329	1.36347
YDR365W-A	transposable_element_gene	NA	NA	NA
YDR365W-B	transposable_element_gene	0.7604	1.24325	1.47255
YDR367W	mRNA	NA	NA	NA
YDR368W	mRNA	NA	0.685715	NA
YDR369C	mRNA	NA	1.11439	1.55794
YDR370C	mRNA	1.72969	1.61086	1.49898
YDR371W	mRNA	0.992635	0.984382	1.56139
YDR372C	mRNA	0.578819	0.821471	0.696617
YDR373W	mRNA	NA	0.667903	NA
YDR375C	mRNA	NA	1.04171	1.78636
YDR376W	mRNA	NA	1.09328	1.26132
YDR377W	mRNA	NA	1.06386	0.947899
YDR378C	mRNA	1.1331	1.4347	1.42514
YDR379W	mRNA	0.96619	1.46792	2.13634
YDR380W	mRNA	NA	1.60039	-1.40306
YDR381W	mRNA	0.963298	0.752353	0.935584
YDR382W	mRNA	0.458408	0.541498	0.751529
YDR383C	mRNA	NA	1.64236	1.52322
YDR384C	mRNA	NA	1.50144	NA
YDR386W	mRNA	1.12538	1.49392	1.67221
YDR387C	mRNA	NA	NA	1.46093
YDR388W	mRNA	0.417685	0.583659	0.907007
YDR390C	mRNA	NA	0.917368	1.04067
YDR391C	mRNA	NA	NA	NA
YDR392W	mRNA	NA	1.32651	1.65897
YDR394W	mRNA	-0.468292	0.493292	NA
YDR395W	mRNA	0.288061	0.553415	0.520481
YDR397C	mRNA	NA	NA	NA
YDR398W	mRNA	1.27632	0.898356	0.937042
YDR399W	mRNA	1.08855	0.797052	0.641409
YDR400W	mRNA	0.606409	0.7809	0.880889
YDR404C	mRNA	1.96607	1.00831	1.19543
YDR405W	mRNA	NA	1.32789	1.97907
YDR406W	mRNA	NA	NA	2.80373
YDR407C	mRNA	0.745938	1.16926	1.46056
YDR408C	mRNA	0.873712	0.993959	1.59922
YDR409W	mRNA	0.914358	1.42799	2.21227
YDR410C	mRNA	NA	1.53977	1.58191
YDR411C	mRNA	NA	0.968117	NA
YDR412W	mRNA	1.17742	1.57153	1.15065
YDR415C	mRNA	0.861884	0.569256	1.37931
YDR416W	mRNA	NA	1.13023	1.40497
YDR418W	mRNA	0.491591	0.694369	0.247926
YDR419W	mRNA	NA	NA	1.94073
YDR420W	mRNA	NA	1.10422	1.71503
YDR421W	mRNA	NA	1.24668	1.94681
YDR422C	mRNA	NA	0.74166	1.53346
YDR423C	mRNA	0.912828	1.36703	2.14104
YDR424C	mRNA	NA	NA	NA
YDR425W	mRNA	1.53173	1.57583	2.07378
YDR427W	mRNA	0.889398	1.331	0.981003
YDR428C	mRNA	NA	1.29812	2.62086
YDR429C	mRNA	0.853151	1.05275	0.646197
YDR430C	mRNA	-0.866211	0.710621	0.904416
YDR432W	mRNA	1.0761	0.713318	0.416777
YDR434W	mRNA	NA	0.60672	0.917434
YDR435C	mRNA	NA	NA	1.24414
YDR436W	mRNA	0.992308	1.62762	2.34458
YDR437W	mRNA	1.45074	1.97524	2.5218
YDR440W	mRNA	1.34765	1.34579	1.4886
YDR441C	mRNA	1.10738	0.92562	1.57915
YDR443C	mRNA	0.64725	0.96003	1.60006
YDR444W	mRNA	0.934692	1.14511	1.76865
YDR447C	mRNA	0.640336	0.658764	NA
YDR448W	mRNA	3.0609	1.95394	2.30404
YDR449C	mRNA	1.49777	1.64259	1.77455
YDR450W	mRNA	NA	0.728394	NA
YDR451C	mRNA	2.58885	1.76432	2.48194
YDR452W	mRNA	NA	0.638625	1.1191
YDR453C	mRNA	NA	NA	2.54782
YDR454C	mRNA	0.553134	0.578453	0.618014
YDR456W	mRNA	NA	0.49733	0.903163
YDR457W	mRNA	NA	0.855118	1.07668
YDR458C	mRNA	1.70366	1.56432	1.88248
YDR459C	mRNA	NA	1.2701	1.42802
YDR460W	mRNA	1.37552	2.17282	1.47474
YDR461W	mRNA	2.39906	2.31402	2.34517
YDR462W	mRNA	0.934719	1.26235	1.62948
YDR463W	mRNA	0.808698	1.13237	1.42577
YDR464W	mRNA	NA	1.19713	1.6031
YDR465C	mRNA	NA	0.587239	0.576078
YDR466W	mRNA	1.22368	0.992255	1.80262
YDR468C	mRNA	1.60449	1.61871	2.22138
YDR469W	mRNA	1.09544	1.58035	1.47165
YDR470C	mRNA	NA	NA	1.1557
YDR471W	mRNA	1.11921	NA	NA
YDR472W	mRNA	NA	1.20338	1.2088
YDR473C	mRNA	1.5744	1.89893	2.70978
YDR475C	mRNA	NA	0.888945	1.68547
YDR476C	mRNA	NA	NA	1.07808
YDR477W	mRNA	NA	0.694163	0.811904
YDR478W	mRNA	NA	NA	NA
YDR479C	mRNA	1.13028	1.29705	2.21982
YDR480W	mRNA	NA	NA	1.45849
YDR481C	mRNA	NA	0.701992	0.810449
YDR482C	mRNA	1.75364	1.85028	2.40319
YDR483W	mRNA	NA	0.469211	0.670339
YDR484W	mRNA	1.13388	1.3134	1.54871
YDR485C	mRNA	0.987909	1.51308	1.80115
YDR486C	mRNA	NA	1.72701	2.14407
YDR487C	mRNA	0.587241	0.702668	0.638109
YDR488C	mRNA	0.817306	0.814676	1.24473
YDR489W	mRNA	NA	1.17861	1.39836
YDR490C	mRNA	NA	NA	1.69271
YDR492W	mRNA	NA	NA	NA
YDR493W	mRNA	2.16601	3.45794	3.60041
YDR494W	mRNA	0.958343	1.35717	1.79047
YDR495C	mRNA	NA	NA	NA
YDR496C	mRNA	1.16532	1.1027	1.02325
YDR497C	mRNA	NA	0.694945	0.38031
YDR498C	mRNA	NA	NA	1.04939
YDR499W	mRNA	1.12918	1.00393	1.86027
YDR500C	mRNA	0.599628	1.17262	0.667605
YDR501W	mRNA	1.15267	1.24224	1.72145
YDR502C	mRNA	0.460107	0.455558	NA
YDR503C	mRNA	NA	1.47848	1.71103
YDR504C	mRNA	2.09868	1.30175	1.77091
YDR505C	mRNA	1.19903	0.918111	2.83789
YDR506C	mRNA	NA	1.04452	1.83917
YDR507C	mRNA	1.50809	1.18568	1.49818
YDR508C	mRNA	0.385513	0.719758	0.968035
YDR510W	mRNA	1.00195	0.88306	0.904108
YDR511W	mRNA	NA	1.71751	2.0625
YDR512C	mRNA	NA	1.06315	NA
YDR513W	mRNA	0.711185	0.912405	NA
YDR514C	mRNA	NA	1.31103	1.62236
YDR515W	mRNA	1.70283	2.01866	1.2403
YDR516C	mRNA	-0.744032	NA	0.79027
YDR517W	mRNA	NA	NA	1.15696
YDR518W	mRNA	NA	NA	NA
YDR519W	mRNA	0.793733	0.764278	NA
YDR520C	mRNA	1.12669	1.3159	2.31684
YDR524C	mRNA	1.87461	1.7724	1.93961
YDR527W	mRNA	1.15599	1.48373	1.72961
YDR528W	mRNA	2.80939	2.2958	3.06088
YDR529C	mRNA	0.969202	1.6564	1.15146
YDR530C	mRNA	1.20416	1.51164	2.13106
YDR531W	mRNA	0.974647	1.29916	0.96026
YDR532C	mRNA	3.08772	1.91835	2.2869
YDR533C	mRNA	1.55127	NA	1.81235
YDR538W	mRNA	NA	NA	NA
YDR539W	mRNA	0.772461	0.769211	1.19311
YDR540C	mRNA	NA	NA	NA
YDR541C	mRNA	NA	1.2987	1.19548
YDRCdelta2	Ty1	NA	NA	NA
YDRCdelta21	Ty1-3'LTR	NA	NA	NA
YDRCdelta22	Ty1-5'LTR	NA	NA	NA
YDRCdelta3	Ty1	NA	NA	NA
YDRCdelta4	Ty2	NA	NA	NA
YDRCdelta5	Ty2	NA	NA	NA
YDRCdelta6a	Ty1	NA	NA	NA
YDRCdelta6b	Ty1	NA	NA	NA
YDRCdelta7	Ty1-3'LTR	NA	NA	NA
YDRCdelta8	Ty1-5'LTR	NA	NA	NA
YDRCdelta9	Ty1	NA	NA	NA
YDRCsigma1	Ty3	NA	NA	NA
YDRCsigma2	Ty3	NA	NA	NA
YDRCsigma3	Ty3	NA	NA	2.48246
YDRCsigma4	Ty3	NA	NA	NA
YDRCsigma6	Ty3	NA	NA	NA
YDRWdelta10	Ty1	NA	NA	NA
YDRWdelta11	Ty1	NA	NA	NA
YDRWdelta12	Ty1	NA	2.58378	2.18871
YDRWdelta13	Ty1-5'LTR	NA	NA	NA
YDRWdelta14	Ty1-3'LTR	NA	NA	NA
YDRWdelta19	Ty1-5'LTR	NA	NA	NA
YDRWdelta20	Ty1-3'LTR	NA	NA	NA
YDRWdelta23	Ty1-5'LTR	NA	NA	NA
YDRWdelta24	Ty1-3'LTR	NA	NA	NA
YDRWdelta25	Ty1	NA	2.05806	NA
YDRWdelta26	Ty1	NA	NA	NA
YDRWdelta27	Ty1-5'LTR	NA	NA	NA
YDRWdelta28	Ty1-3'LTR	NA	0.552467	NA
YDRWdelta29	Ty1	NA	NA	NA
YDRWdelta30	Ty1	NA	NA	NA
YDRWdelta31	Ty1	NA	NA	2.82392
YDRWdelta7	Ty1	NA	NA	1.92168
YDRWsigma2	Ty3	NA	NA	NA
YDRWsigma4	Ty3	NA	NA	NA
YDRWsigma5	Ty3	NA	NA	NA
YEL001C	mRNA	NA	0.825063	NA
YEL002C	mRNA	NA	0.693331	NA
YEL004W	mRNA	1.08767	1.27421	1.62874
YEL005C	mRNA	NA	NA	2.06942
YEL006W	mRNA	0.843975	NA	0.959313
YEL007W	mRNA	0.705458	1.21026	1.5463
YEL011W	mRNA	NA	1.43227	3.06853
YEL012W	mRNA	NA	NA	NA
YEL013W	mRNA	0.456415	0.747435	0.759712
YEL015W	mRNA	NA	1.1185	0.794519
YEL016C	mRNA	1.13219	1.42826	1.52722
YEL017C-A	mRNA	0.779037	0.791613	0.826117
YEL017W	mRNA	1.21643	NA	NA
YEL018W	mRNA	3.40883	1.74291	2.25004
YEL019C	mRNA	NA	NA	1.51347
YEL021W	mRNA	-2.82245	-3.17107	-2.69908
YEL022W	mRNA	0.611079	1.42351	1.27782
YEL024W	mRNA	1.3636	1.10703	1.50024
YEL025C	mRNA	0.55077	0.643441	1.01003
YEL026W	mRNA	1.40783	0.934987	0.344946
YEL027W	mRNA	0.202618	0.44287	0.217441
YEL029C	mRNA	1.49403	1.40648	NA
YEL031W	mRNA	NA	0.239368	NA
YEL032W	mRNA	1.55662	0.673418	0.962539
YEL034W	mRNA	0.52757	0.427915	-0.15039
YEL036C	mRNA	NA	1.1215	0.866864
YEL037C	mRNA	NA	NA	NA
YEL038W	mRNA	1.08989	NA	1.2809
YEL039C	mRNA	NA	NA	NA
YEL040W	mRNA	1.00007	0.514686	0.301383
YEL042W	mRNA	0.386345	0.618589	0.469763
YEL043W	mRNA	NA	0.672138	0.930595
YEL044W	mRNA	NA	NA	0.87057
YEL046C	mRNA	0.544687	0.691517	1.19558
YEL047C	mRNA	NA	NA	0.580683
YEL048C	mRNA	NA	1.24408	1.1467
YEL050C	mRNA	0.983386	1.03322	1.40995
YEL051W	mRNA	0.503384	0.579827	0.427684
YEL052W	mRNA	0.57469	0.661205	1.07548
YEL053C	mRNA	0.956867	0.906406	1.14235
YEL054C	mRNA	0.781077	1.02517	NA
YEL055C	mRNA	NA	0.573281	0.577291
YEL056W	mRNA	-1.01095	NA	NA
YEL058W	mRNA	NA	0.571042	0.579729
YEL059C-A	mRNA	NA	NA	NA
YEL060C	mRNA	1.01839	0.551216	1.73058
YEL061C	mRNA	3.77523	1.92819	2.72715
YEL062W	mRNA	1.03814	1.03222	1.50374
YEL063C	mRNA	0.852035	0.673693	1.21208
YEL064C	mRNA	NA	1.55424	1.8076
YEL065W	mRNA	NA	1.01132	2.62798
YEL066W	mRNA	NA	NA	0.967009
YEL067C	mRNA	NA	NA	1.87192
YEL069C	mRNA	NA	NA	NA
[truncated: 3,946 more rows]
