# Supplementary material for: Genome-Wide Mapping of Decay Factor–mRNA Interactions in Yeast Identifies Nutrient-Responsive Transcripts as Targets of the Deadenylase Ccr4
Source: G3 (Bethesda). 2017 Nov 20;8(1):315–30. doi: 10.1534/g3.117.300415 (PMC5765359; doi:10.1534/g3.117.300415)
Supplement: Supplementary file 3 [file 315FileS3.xlsx]

## Sheet: GSE72366_RIP_enrichment_thirds.
genes	Puf5.5end	Puf5.Mid	Puf5.3end	Dhh1.5end	Dhh1.Mid	Dhh1.3end	Ccr4.5end	Ccr4.Mid	Ccr4.3end
ARS1011	NA	NA	NA	NA	NA	NA	NA	NA	NA
ARS1012	NA	NA	NA	NA	NA	NA	NA	NA	NA
ARS1014	NA	NA	NA	NA	NA	NA	NA	NA	NA
ARS1018	NA	NA	NA	NA	NA	NA	NA	NA	NA
ARS1020	NA	NA	NA	NA	NA	NA	NA	NA	NA
ARS1022	NA	NA	NA	NA	NA	NA	NA	NA	NA
ARS1024	NA	NA	NA	NA	NA	NA	NA	NA	NA
ARS104	NA	NA	1.83478	NA	NA	NA	NA	NA	NA
ARS106	NA	NA	NA	NA	NA	NA	NA	NA	NA
ARS107	NA	NA	NA	NA	NA	NA	NA	NA	NA
ARS109	NA	NA	NA	NA	NA	NA	NA	NA	NA
ARS110	NA	NA	NA	NA	NA	NA	NA	NA	NA
ARS1103	NA	NA	NA	NA	NA	NA	NA	NA	NA
ARS1106	NA	NA	NA	NA	NA	NA	NA	NA	NA
ARS1109	NA	NA	NA	NA	NA	NA	NA	NA	NA
ARS1112	NA	NA	NA	NA	NA	NA	NA	NA	NA
ARS1113	NA	NA	NA	NA	NA	NA	NA	NA	NA
ARS1114	NA	NA	NA	NA	NA	NA	NA	NA	NA
ARS1116	NA	NA	NA	NA	NA	NA	NA	NA	NA
ARS1118	NA	NA	NA	NA	NA	NA	NA	NA	NA
ARS1120	NA	NA	NA	NA	NA	NA	3.09562	NA	NA
ARS1123	NA	NA	NA	NA	NA	NA	NA	NA	NA
ARS1125	NA	NA	NA	NA	4.25731	NA	NA	NA	NA
ARS1126	NA	NA	NA	NA	NA	NA	NA	NA	NA
ARS1206	NA	NA	NA	NA	NA	NA	NA	NA	NA
ARS1209	NA	NA	NA	NA	NA	NA	NA	NA	NA
ARS1211	NA	NA	NA	NA	NA	NA	NA	NA	NA
ARS1212	NA	NA	NA	NA	NA	NA	NA	NA	NA
ARS1213	NA	NA	NA	NA	NA	NA	NA	NA	NA
ARS1215	NA	NA	NA	NA	NA	NA	NA	NA	NA
ARS1216	NA	NA	NA	NA	NA	NA	NA	NA	NA
ARS1217	NA	NA	NA	NA	NA	NA	NA	NA	NA
ARS1218	NA	NA	NA	NA	NA	NA	NA	NA	NA
ARS1220	NA	NA	NA	NA	NA	NA	NA	NA	NA
ARS1223	NA	NA	NA	NA	NA	NA	NA	NA	NA
ARS1226	NA	NA	NA	NA	NA	NA	NA	NA	NA
ARS1232	NA	NA	NA	NA	NA	NA	NA	NA	NA
ARS1233	NA	NA	NA	NA	NA	NA	NA	NA	NA
ARS1234	NA	NA	NA	NA	NA	NA	NA	NA	NA
ARS1238	NA	NA	NA	NA	NA	NA	NA	NA	NA
ARS1303	NA	NA	NA	NA	NA	NA	NA	NA	NA
ARS1305	NA	NA	NA	NA	NA	NA	NA	NA	NA
ARS1307	NA	NA	NA	NA	NA	NA	NA	NA	NA
ARS1308	NA	NA	NA	NA	NA	NA	NA	NA	NA
ARS1309	NA	NA	NA	NA	NA	NA	NA	NA	NA
ARS1310	NA	NA	NA	NA	NA	NA	NA	NA	NA
ARS1312	NA	NA	NA	NA	NA	NA	NA	NA	NA
ARS1316	NA	NA	NA	NA	NA	NA	2.7649	NA	NA
ARS1320	NA	NA	NA	NA	NA	NA	NA	NA	NA
ARS1323	NA	NA	NA	NA	NA	NA	NA	NA	NA
ARS1324	2.79279	NA	NA	NA	NA	NA	NA	NA	NA
ARS1325	NA	NA	NA	NA	NA	NA	NA	NA	NA
ARS1327	NA	NA	NA	NA	NA	NA	NA	NA	NA
ARS1328	NA	NA	NA	NA	NA	NA	NA	NA	NA
ARS1329	NA	NA	NA	NA	NA	NA	NA	NA	NA
ARS1330	NA	NA	NA	NA	NA	NA	NA	NA	NA
ARS1332	NA	NA	NA	NA	NA	NA	NA	NA	NA
ARS1405	NA	NA	NA	NA	NA	NA	NA	NA	NA
ARS1406	NA	NA	NA	NA	NA	NA	NA	NA	NA
ARS1407	NA	NA	NA	NA	NA	NA	NA	NA	NA
ARS1411	NA	NA	NA	NA	NA	NA	NA	NA	NA
ARS1412	NA	NA	NA	NA	NA	NA	NA	NA	NA
ARS1414	NA	NA	NA	NA	NA	NA	NA	NA	NA
ARS1415	NA	NA	NA	NA	NA	NA	NA	NA	NA
ARS1417	NA	NA	NA	NA	NA	NA	NA	NA	NA
ARS1419	NA	NA	NA	NA	NA	NA	NA	NA	NA
ARS1420	NA	NA	NA	NA	NA	NA	NA	NA	NA
ARS1421	2.69253	NA	NA	NA	NA	NA	NA	NA	NA
ARS1422	NA	NA	NA	NA	NA	NA	NA	NA	NA
ARS1424	NA	NA	NA	NA	NA	NA	NA	NA	NA
ARS1426	NA	NA	NA	NA	NA	NA	NA	NA	NA
ARS1427	NA	NA	NA	NA	NA	NA	NA	NA	NA
ARS1507	NA	NA	NA	NA	NA	NA	NA	NA	NA
ARS1508	-3.96507	NA	NA	-3.78478	NA	NA	-3.92155	NA	NA
ARS1509	NA	NA	NA	NA	NA	NA	NA	NA	NA
ARS1510	NA	NA	NA	NA	NA	NA	NA	NA	NA
ARS1511	NA	NA	NA	NA	NA	NA	NA	NA	NA
ARS1513	NA	NA	NA	NA	NA	NA	NA	NA	NA
ARS1516	NA	NA	NA	NA	NA	NA	NA	NA	NA
ARS1519	NA	NA	NA	NA	NA	NA	NA	NA	NA
ARS1521	NA	NA	NA	NA	NA	NA	NA	NA	NA
ARS1523	NA	NA	NA	NA	NA	NA	NA	NA	NA
ARS1524	NA	NA	NA	NA	NA	NA	NA	NA	NA
ARS1526	NA	NA	NA	NA	NA	NA	NA	NA	NA
ARS1528	NA	NA	NA	NA	NA	NA	NA	NA	NA
ARS1529	NA	NA	NA	NA	NA	NA	NA	NA	NA
ARS1531	NA	NA	NA	NA	NA	NA	NA	NA	NA
ARS1604	NA	NA	NA	3.30983	2.55113	NA	2.71503	3.82798	NA
ARS1605	NA	NA	NA	NA	NA	NA	NA	NA	NA
ARS1607	NA	NA	NA	NA	NA	NA	NA	NA	NA
ARS1614	NA	NA	NA	NA	NA	NA	NA	NA	NA
ARS1618	NA	NA	NA	NA	NA	NA	NA	NA	NA
ARS1619	NA	NA	NA	NA	NA	NA	NA	NA	NA
ARS1622	NA	NA	NA	NA	NA	NA	NA	NA	NA
ARS1623	NA	NA	NA	NA	NA	NA	NA	NA	NA
ARS1624	NA	NA	NA	NA	NA	NA	NA	NA	NA
ARS1625	NA	NA	NA	NA	NA	NA	NA	NA	NA
ARS1626	1.27687	NA	NA	NA	NA	NA	-2.09685	NA	NA
ARS1627	NA	NA	NA	NA	NA	NA	3.32954	NA	NA
ARS1628	NA	NA	NA	NA	NA	NA	NA	NA	NA
ARS1630	NA	NA	NA	NA	NA	NA	NA	NA	NA
ARS1631	NA	NA	NA	NA	NA	NA	NA	NA	NA
ARS1633	NA	NA	NA	NA	NA	NA	NA	NA	NA
ARS1634	NA	NA	NA	NA	NA	NA	NA	NA	NA
ARS1635	NA	NA	NA	NA	NA	NA	NA	NA	NA
ARS202	NA	NA	NA	NA	NA	NA	NA	NA	NA
ARS207	NA	NA	NA	NA	NA	NA	NA	NA	NA
ARS208	NA	NA	NA	NA	NA	NA	NA	NA	NA
ARS211	NA	NA	NA	NA	NA	NA	NA	NA	NA
ARS214	NA	NA	NA	NA	NA	NA	NA	NA	NA
ARS215	NA	NA	NA	NA	NA	NA	NA	NA	NA
ARS216	NA	NA	NA	NA	NA	NA	NA	NA	NA
ARS220	NA	NA	NA	NA	NA	NA	NA	NA	NA
ARS222	NA	NA	NA	NA	NA	NA	NA	NA	NA
ARS224	NA	NA	NA	2.37606	NA	NA	NA	NA	NA
ARS225	NA	NA	NA	NA	NA	NA	NA	NA	NA
ARS228	NA	NA	NA	NA	NA	NA	NA	NA	NA
ARS230	NA	NA	NA	NA	NA	NA	NA	NA	NA
ARS231	NA	NA	NA	NA	NA	NA	NA	NA	NA
ARS301	NA	NA	NA	NA	NA	NA	NA	NA	NA
ARS302	NA	NA	NA	NA	NA	NA	NA	NA	NA
ARS306	NA	NA	NA	NA	NA	NA	NA	NA	NA
ARS313	NA	NA	NA	NA	NA	NA	NA	NA	NA
ARS314	NA	NA	NA	NA	NA	NA	NA	NA	NA
ARS315	NA	NA	NA	NA	NA	NA	NA	NA	NA
ARS316	NA	NA	NA	NA	NA	NA	NA	NA	NA
ARS403	NA	NA	NA	NA	NA	NA	NA	NA	NA
ARS405	NA	NA	NA	NA	NA	NA	NA	NA	NA
ARS406	NA	NA	NA	NA	NA	NA	NA	NA	NA
ARS409	NA	NA	NA	NA	NA	NA	NA	NA	NA
ARS410	NA	NA	NA	NA	NA	NA	NA	NA	NA
ARS413	NA	NA	NA	NA	NA	NA	NA	NA	NA
ARS414	NA	NA	NA	NA	NA	NA	NA	NA	NA
ARS417	NA	NA	NA	NA	NA	NA	NA	NA	NA
ARS418	NA	NA	NA	NA	NA	NA	NA	NA	NA
ARS419	NA	NA	NA	NA	NA	NA	NA	NA	NA
ARS421	NA	NA	NA	NA	NA	NA	NA	NA	NA
ARS422	NA	NA	NA	NA	NA	NA	NA	NA	NA
ARS423	NA	NA	NA	NA	NA	NA	NA	NA	NA
ARS425	NA	NA	NA	NA	NA	NA	NA	NA	NA
ARS428	NA	NA	NA	NA	NA	NA	NA	NA	NA
ARS429	NA	NA	NA	NA	NA	NA	NA	NA	NA
ARS430	NA	NA	NA	NA	NA	NA	NA	NA	NA
ARS431	NA	NA	NA	NA	NA	NA	NA	NA	NA
ARS432	NA	NA	NA	NA	NA	NA	NA	NA	NA
ARS433	NA	NA	NA	NA	NA	NA	NA	NA	NA
ARS434	NA	NA	NA	NA	NA	NA	NA	NA	NA
ARS435	NA	NA	NA	NA	NA	NA	NA	NA	NA
ARS440	NA	NA	NA	NA	NA	NA	NA	NA	NA
ARS446	NA	NA	NA	NA	NA	NA	NA	NA	NA
ARS450	NA	NA	NA	NA	NA	NA	NA	NA	NA
ARS451	NA	NA	NA	NA	NA	NA	NA	NA	NA
ARS452	NA	NA	NA	NA	NA	NA	NA	NA	NA
ARS453	NA	NA	NA	NA	NA	NA	NA	NA	NA
ARS507	NA	NA	NA	NA	NA	NA	NA	NA	NA
ARS508	NA	NA	NA	NA	NA	NA	NA	NA	NA
ARS510	NA	NA	NA	NA	NA	NA	NA	NA	NA
ARS511	NA	NA	NA	NA	NA	NA	NA	NA	NA
ARS512	NA	NA	NA	NA	NA	NA	NA	NA	NA
ARS514	NA	NA	NA	NA	NA	NA	NA	NA	NA
ARS515	NA	NA	NA	NA	NA	NA	NA	NA	NA
ARS516	NA	NA	NA	NA	NA	NA	NA	NA	NA
ARS517	NA	NA	NA	NA	NA	NA	NA	NA	NA
ARS518	NA	NA	NA	NA	NA	NA	NA	NA	NA
ARS521	NA	NA	NA	NA	NA	NA	NA	NA	NA
ARS522	NA	NA	NA	NA	NA	NA	NA	NA	NA
ARS702	NA	NA	NA	NA	NA	NA	NA	NA	NA
ARS704	NA	NA	NA	NA	NA	NA	NA	NA	NA
ARS706	NA	NA	NA	NA	NA	NA	NA	NA	NA
ARS707	NA	NA	NA	NA	NA	NA	NA	NA	NA
ARS710	NA	NA	NA	NA	NA	NA	NA	NA	NA
ARS714	NA	NA	NA	NA	NA	NA	NA	NA	NA
ARS716	NA	NA	NA	NA	NA	NA	NA	NA	NA
ARS717	NA	NA	NA	NA	NA	NA	2.68095	NA	NA
ARS718	NA	NA	NA	NA	NA	NA	NA	NA	NA
ARS719	NA	NA	NA	NA	NA	NA	NA	NA	NA
ARS720	NA	NA	NA	NA	NA	NA	NA	NA	NA
ARS721	NA	NA	NA	NA	NA	NA	NA	NA	NA
ARS722	NA	NA	NA	NA	NA	NA	NA	NA	NA
ARS727	NA	NA	NA	NA	NA	NA	NA	NA	NA
ARS728	NA	NA	NA	NA	NA	NA	NA	NA	NA
ARS729	NA	NA	NA	NA	NA	NA	NA	NA	NA
ARS731	NA	NA	NA	NA	NA	NA	NA	NA	NA
ARS733	NA	NA	NA	NA	NA	NA	NA	NA	NA
ARS734	NA	NA	NA	NA	NA	NA	NA	NA	NA
ARS737	NA	NA	NA	NA	NA	NA	NA	NA	NA
ARS802	NA	NA	NA	NA	NA	NA	NA	NA	NA
ARS805	NA	NA	NA	NA	NA	NA	NA	NA	NA
ARS807	NA	NA	NA	NA	NA	NA	NA	NA	NA
ARS809	NA	NA	NA	NA	NA	NA	NA	NA	NA
ARS813	NA	NA	NA	NA	NA	NA	NA	NA	NA
ARS818	NA	NA	NA	NA	NA	NA	NA	NA	NA
ARS820	NA	NA	NA	NA	NA	NA	NA	NA	NA
ARS822	NA	NA	NA	NA	NA	NA	NA	NA	NA
ARS909	NA	NA	NA	NA	NA	NA	NA	NA	NA
ARS911	NA	NA	NA	NA	NA	NA	NA	NA	NA
ARS913	3.77165	NA	NA	NA	NA	NA	1.61757	NA	NA
ARS914	NA	NA	NA	NA	NA	NA	NA	NA	NA
ARS919	NA	NA	NA	NA	NA	NA	NA	NA	NA
ARS920	NA	NA	NA	NA	NA	NA	NA	NA	NA
ARS922	NA	NA	NA	NA	NA	NA	NA	NA	NA
ARS923	NA	NA	NA	NA	NA	NA	NA	NA	NA
HRA1	NA	NA	NA	NA	NA	NA	NA	NA	NA
LSR1	-0.638445	-0.678747	-1.06082	-0.169834	NA	-0.40321	0.702109	0.793316	0.407526
NME1	-0.882116	-0.533293	NA	NA	0.52234	1.10375	0.548781	1.13605	1.03732
RDN37-1	0.123422	-0.17104	0.0871938	-0.011153	-0.0303275	0.0662543	-0.194913	0.0902562	-0.103503
RNA170	NA	NA	NA	NA	NA	NA	NA	NA	NA
RPR1	-0.836423	-1.12088	-0.663104	NA	-0.585295	0.483851	0.581009	0.700691	0.593448
RUF5-1	NA	NA	NA	NA	NA	NA	NA	NA	NA
RUF5-2	NA	NA	NA	NA	NA	NA	NA	NA	3.13338
SCR1	-0.601385	-0.0889367	0.177615	0.410438	0.451109	0.934554	1.24212	1.31199	1.30148
snR10	-1.21615	-0.699377	NA	-0.786048	NA	NA	-0.353817	NA	NA
snR11	-1.46055	-1.93895	NA	-0.536419	-1.93447	NA	NA	-0.587844	NA
snR128	-1.63188	NA	NA	-0.914312	NA	NA	-0.573788	0.727339	0.822708
snR13	-2.86886	NA	-0.836124	-1.80904	NA	NA	-1.93011	NA	0.50571
snR14	-1.38695	NA	NA	-0.649781	0.718194	NA	0.577453	1.17485	NA
snR161	-1.19636	NA	NA	NA	NA	NA	NA	NA	1.25661
snR17b	NA	-1.91843	-1.26978	NA	-1.38892	-0.354977	NA	-0.972275	-0.631913
snR18	-0.74764	NA	NA	NA	NA	NA	0.621768	1.04197	NA
snR189	NA	NA	NA	NA	NA	NA	1.45658	0.900068	NA
snR19	-0.47537	-0.42163	NA	0.429775	0.431648	NA	0.828622	1.33068	0.854011
snR190	-0.681799	NA	NA	NA	0.55725	1.05456	NA	0.582841	NA
snR191	-0.830839	-1.53818	NA	-0.36038	-0.639118	NA	NA	NA	NA
snR24	-1.65531	NA	NA	NA	NA	NA	NA	NA	NA
snR3	-0.80521	-0.673463	NA	NA	0.511352	NA	0.913035	0.86536	NA
snR30	-1.32079	-0.949556	-1.04445	-0.305758	-0.151352	NA	0.408181	0.319018	NA
snR31	-1.05508	-1.38472	NA	-0.567585	-1.10811	NA	NA	-0.492993	0.721717
snR32	NA	-0.797199	NA	NA	-0.416315	1.57178	0.668819	0.541372	1.89296
snR33	-1.40995	-0.6901	NA	-0.667036	NA	NA	NA	0.527325	NA
snR34	NA	NA	-0.907358	NA	NA	NA	1.21875	0.543513	NA
snR35	-1.10961	-1.01405	NA	-0.942529	-0.38601	NA	0.189082	-0.0126861	NA
snR36	-1.49599	NA	NA	-0.676735	NA	NA	NA	NA	NA
snR37	-1.49831	-0.523105	-0.737068	NA	NA	NA	-0.0959133	0.517672	NA
snR39	NA	NA	NA	NA	NA	NA	NA	NA	NA
snR39B	-1.26326	NA	NA	NA	NA	NA	-0.745192	NA	NA
snR4	NA	NA	NA	NA	NA	NA	0.52345	0.789027	0.831464
snR40	NA	-1.13106	NA	NA	NA	NA	0.779946	NA	NA
snR41	-1.90449	NA	NA	-1.43534	NA	NA	-0.958008	NA	NA
snR42	-1.02223	-0.933689	-1.05121	-0.659739	-0.651243	NA	NA	0.340649	0.525873
snR43	-0.754189	NA	NA	-0.568842	NA	NA	NA	1.1873	NA
snR45	-0.680827	NA	NA	NA	NA	NA	0.810592	1.05365	1.55923
snR46	-1.39926	-1.0152	NA	-0.978875	NA	NA	NA	NA	NA
snR47	NA	0.638211	NA	NA	0.707833	NA	0.798921	0.711327	1.47511
snR48	-2.24221	NA	NA	-1.41224	NA	NA	-1.29133	NA	1.87631
snR49	-0.941514	NA	NA	NA	NA	NA	NA	NA	NA
snR5	-1.10404	-0.922903	NA	-0.644034	-0.759407	NA	NA	NA	NA
snR50	NA	NA	NA	NA	NA	NA	NA	NA	NA
snR51	-1.71833	NA	NA	-1.47398	NA	NA	NA	NA	NA
snR52	-0.837336	NA	NA	NA	NA	NA	0.528532	NA	NA
snR53	NA	NA	NA	NA	NA	NA	NA	NA	NA
snR54	NA	NA	NA	NA	1.08239	NA	NA	NA	NA
snR55	-1.12157	NA	NA	NA	NA	NA	NA	NA	NA
snR56	-1.0443	-0.926629	NA	NA	NA	NA	NA	NA	NA
snR57	-2.02193	NA	NA	0.222884	NA	NA	-1.26476	NA	NA
snR58	-1.68411	NA	NA	NA	NA	NA	NA	NA	NA
snR6	NA	NA	NA	NA	1.11885	NA	1.61413	1.74087	NA
snR60	-1.93745	NA	NA	-1.17523	NA	NA	-1.16699	NA	NA
snR61	-0.978026	NA	NA	-0.594308	NA	NA	NA	0.6901	NA
snR62	NA	NA	NA	2.65245	NA	NA	NA	NA	NA
snR63	-0.996034	-0.589683	NA	NA	NA	NA	0.742112	NA	NA
snR64	NA	NA	NA	NA	NA	NA	1.14116	NA	NA
snR65	NA	NA	NA	NA	NA	NA	NA	3.27412	NA
snR66	-0.909748	NA	NA	-0.660414	NA	NA	NA	NA	NA
snR67	NA	NA	NA	NA	NA	NA	1.16639	NA	NA
snR68	-1.41435	NA	NA	-1.05226	1.85363	NA	-0.889745	NA	1.7219
snR69	-1.47891	NA	NA	NA	NA	NA	NA	NA	NA
snR7-L	NA	NA	NA	NA	NA	NA	NA	NA	NA
snR7-S	-0.999945	-1.05602	-0.677613	NA	NA	0.983814	1.3826	0.878021	1.22875
snR70	-1.73319	NA	NA	-0.886423	NA	NA	-0.791725	0.690867	0.707425
snR71	NA	NA	NA	0.776557	NA	NA	NA	NA	NA
snR78|77|76|75|74|73|72	-1.63004	-0.777342	-1.1417	NA	0.348901	NA	-0.836709	NA	-0.379435
snR79	-1.98666	NA	NA	NA	NA	NA	NA	NA	NA
snR8	-1.34086	-0.859559	NA	-0.945433	-0.479227	0.921089	-0.770299	NA	0.846381
snR80	-1.09808	-2.69719	NA	NA	-1.35011	NA	NA	-1.17594	NA
snR81	NA	NA	NA	NA	NA	NA	1.07144	0.983493	NA
snR82	-1.35565	-0.671678	0.82922	NA	NA	1.50569	NA	NA	1.47782
snR83	NA	-0.946067	NA	NA	-0.757353	1.03568	NA	NA	0.888589
snR84	NA	-0.748572	-0.849128	NA	NA	-0.656608	0.730508	0.575573	NA
snR85	-1.20634	NA	NA	-0.958555	NA	NA	0.244893	1.23237	1.21057
snR86	-0.91119	-0.626225	-0.570703	-0.491086	-0.623224	-0.232678	-0.423118	NA	0.361574
snR87	-0.940928	-1.95544	NA	-0.457613	-1.02702	NA	NA	-1.18231	NA
snR9	-1.6728	-0.827443	-0.556649	-0.613548	NA	NA	NA	0.736838	0.536876
SRG1	NA	2.63528	NA	1.34697	1.14424	NA	1.67958	1.84657	2.23912
tA(AGC)D	NA	NA	NA	NA	1.10807	NA	NA	1.23089	NA
tA(AGC)F	NA	NA	NA	NA	NA	NA	NA	NA	NA
tA(AGC)G	NA	NA	NA	NA	NA	NA	NA	NA	NA
tA(AGC)H	NA	NA	NA	NA	NA	NA	NA	NA	NA
tA(AGC)J	NA	NA	NA	NA	NA	NA	NA	NA	NA
tA(AGC)K1	NA	NA	NA	NA	NA	NA	NA	NA	NA
tA(AGC)K2	NA	NA	NA	NA	NA	NA	NA	NA	NA
tA(AGC)L	NA	NA	NA	NA	NA	NA	NA	NA	NA
tA(AGC)M1	NA	NA	NA	NA	NA	NA	NA	NA	NA
tA(AGC)M2	NA	NA	NA	NA	NA	NA	NA	NA	NA
tA(AGC)P	NA	NA	NA	NA	NA	NA	NA	NA	NA
tA(UGC)A	NA	0.890827	NA	NA	0.887053	NA	NA	1.65247	2.38933
tA(UGC)E	NA	NA	NA	NA	1.6547	NA	NA	1.98267	NA
tA(UGC)G	NA	NA	NA	NA	NA	NA	NA	1.30806	NA
tA(UGC)L	NA	NA	NA	NA	NA	NA	NA	1.41277	NA
tA(UGC)O	NA	NA	NA	NA	NA	NA	NA	NA	NA
tC(GCA)B	0.339874	NA	NA	0.721156	NA	NA	0.650371	NA	NA
tC(GCA)G	NA	NA	NA	NA	NA	NA	NA	1.48515	NA
tC(GCA)P1	NA	NA	NA	NA	NA	NA	NA	NA	NA
tC(GCA)P2	NA	NA	NA	NA	NA	NA	NA	NA	NA
tD(GUC)B	NA	0.774988	NA	NA	0.752442	NA	0.91803	1.25243	NA
tD(GUC)D	NA	1.49581	NA	NA	1.601	NA	NA	1.94894	NA
tD(GUC)G1	NA	NA	NA	NA	NA	NA	NA	NA	NA
tD(GUC)G2	NA	NA	NA	NA	NA	NA	NA	NA	NA
tD(GUC)I1	NA	NA	NA	NA	NA	NA	NA	NA	NA
tD(GUC)I2	NA	NA	NA	NA	NA	NA	NA	NA	NA
tD(GUC)J1	NA	NA	NA	NA	NA	NA	NA	NA	NA
tD(GUC)J2	NA	NA	NA	NA	NA	NA	NA	NA	NA
tD(GUC)J3	NA	NA	NA	NA	NA	NA	NA	NA	NA
tD(GUC)J4	NA	NA	NA	NA	NA	NA	NA	NA	NA
tD(GUC)K	NA	NA	NA	NA	NA	NA	NA	NA	NA
tD(GUC)L1	NA	NA	NA	NA	NA	NA	NA	NA	NA
tD(GUC)L2	NA	NA	NA	NA	NA	NA	NA	NA	NA
tD(GUC)M	NA	NA	NA	NA	NA	NA	NA	NA	NA
tD(GUC)N	NA	NA	NA	NA	NA	NA	NA	NA	NA
tD(GUC)O	NA	NA	NA	NA	NA	NA	NA	NA	NA
tE(CUC)D	NA	0.547127	NA	0.624913	0.708685	NA	1.1619	1.76776	NA
tE(CUC)I	NA	NA	NA	NA	NA	NA	NA	1.9216	NA
tE(UUC)B	0.511078	0.517855	NA	0.758608	0.721542	NA	0.814089	1.26827	NA
tE(UUC)C	1.11737	1.11842	NA	0.806038	1.3059	NA	1.01969	1.8131	NA
tE(UUC)E1	NA	NA	NA	NA	NA	NA	NA	NA	NA
tE(UUC)E2	NA	0.900675	NA	NA	1.2663	NA	NA	1.66159	NA
tE(UUC)E3	NA	0.748225	NA	NA	1.03779	NA	NA	1.16572	NA
tE(UUC)G1	NA	NA	NA	NA	NA	NA	NA	1.46667	NA
tE(UUC)G2	NA	NA	NA	NA	NA	NA	NA	NA	NA
tE(UUC)G3	NA	1.13931	NA	NA	1.39762	NA	NA	1.97019	NA
tE(UUC)I	NA	1.04356	NA	NA	1.03341	NA	NA	1.78759	NA
tE(UUC)J	NA	NA	NA	NA	NA	NA	NA	NA	NA
tE(UUC)K	NA	1.24462	NA	NA	1.44822	NA	NA	1.91865	2.38463
tE(UUC)L	NA	0.912597	NA	NA	1.38004	NA	NA	1.5337	NA
tE(UUC)M	NA	1.06213	NA	NA	1.47793	NA	NA	1.30715	NA
tE(UUC)P	NA	NA	NA	NA	1.15257	NA	NA	1.37663	NA
TEL01L-TR	NA	NA	NA	NA	NA	NA	NA	NA	NA
TEL01L-XC	NA	NA	NA	NA	NA	NA	NA	NA	NA
TEL01L-XR	NA	NA	NA	NA	NA	NA	NA	NA	NA
TEL01R-TR	NA	NA	NA	NA	NA	NA	NA	NA	NA
TEL01R-XC	NA	NA	NA	NA	NA	NA	NA	NA	NA
TEL02L-XC	NA	NA	NA	NA	NA	NA	NA	NA	NA
TEL02L-XR	NA	NA	NA	NA	NA	NA	NA	NA	NA
TEL02L-YP	NA	0.967969	1.57	0.603322	0.295359	0.764366	1.18339	1.12253	1.18849
TEL02R-TR	NA	NA	NA	NA	NA	NA	NA	NA	NA
TEL02R-XC	NA	NA	NA	NA	NA	NA	NA	NA	NA
TEL02R-XR	NA	NA	NA	NA	NA	NA	NA	NA	NA
TEL03L-TR	NA	1.26683	NA	NA	NA	NA	NA	NA	NA
TEL03L-XC	NA	NA	NA	NA	NA	NA	NA	NA	NA
TEL03L-XR	NA	NA	NA	NA	NA	NA	NA	NA	NA
TEL03R-TR	NA	NA	NA	NA	NA	NA	NA	NA	NA
TEL03R-XC	NA	NA	NA	NA	NA	NA	NA	NA	NA
TEL03R-XR	NA	NA	NA	NA	NA	NA	NA	NA	NA
TEL04L-TR	NA	NA	NA	NA	NA	NA	NA	NA	NA
TEL04L-XC	NA	NA	NA	NA	NA	NA	NA	NA	NA
TEL04L-XR	NA	NA	NA	NA	NA	NA	NA	NA	NA
TEL04R-TR	NA	2.61025	NA	NA	NA	NA	NA	NA	NA
TEL04R-XC	NA	NA	NA	NA	NA	NA	NA	NA	NA
TEL04R-XR	NA	NA	NA	NA	NA	NA	NA	NA	NA
TEL04R-YP	0.68469	0.785539	1.81377	0.520296	NA	0.815805	1.07358	0.886146	1.37487
TEL05L-XC	NA	NA	NA	NA	NA	NA	NA	NA	NA
TEL05L-YP	NA	1.08501	1.49346	NA	NA	1.00719	NA	0.873474	1.43255
TEL05R-XC	NA	NA	NA	NA	NA	NA	NA	NA	NA
TEL05R-XR	NA	NA	NA	NA	NA	NA	NA	NA	NA
TEL05R-YP	0.746405	NA	1.74357	NA	NA	1.20111	0.847788	NA	NA
TEL06L-TR	2.4259	NA	NA	NA	NA	NA	NA	NA	NA
TEL06L-XC	NA	NA	NA	NA	NA	NA	NA	NA	NA
TEL06L-XR	NA	NA	NA	NA	NA	NA	NA	NA	NA
TEL06L-YP	NA	NA	1.88744	NA	NA	NA	NA	NA	NA
TEL06R-TR	NA	NA	NA	NA	NA	NA	NA	NA	NA
TEL06R-XC	NA	NA	NA	NA	NA	NA	NA	NA	NA
TEL07L-TR	NA	NA	NA	NA	NA	NA	NA	NA	NA
TEL07L-XC	NA	NA	NA	NA	NA	NA	NA	NA	NA
TEL07L-XR	NA	NA	NA	NA	NA	NA	NA	NA	NA
TEL07R-XC	NA	NA	NA	NA	NA	NA	NA	NA	NA
TEL07R-XR	NA	NA	NA	NA	NA	NA	NA	NA	NA
TEL07R-YP	1.88129	NA	NA	NA	NA	NA	2.67058	NA	NA
TEL08L-TR	NA	NA	NA	NA	NA	NA	NA	NA	NA
TEL08L-XC	NA	NA	NA	NA	NA	NA	NA	NA	NA
TEL08L-XR	NA	NA	NA	NA	NA	NA	NA	NA	NA
TEL08L-YP	NA	NA	NA	NA	NA	NA	NA	NA	NA
TEL08R-TR1	NA	NA	NA	NA	NA	NA	NA	NA	NA
TEL08R-TR2	NA	2.1157	NA	NA	NA	NA	NA	NA	NA
TEL08R-XC	NA	NA	NA	NA	NA	NA	NA	NA	NA
TEL08R-XR	NA	NA	NA	NA	NA	NA	NA	NA	NA
TEL08R-YP	NA	NA	NA	NA	NA	NA	NA	NA	NA
TEL09L-TR	NA	2.52652	NA	NA	NA	NA	NA	NA	NA
TEL09L-XC	NA	NA	NA	NA	NA	NA	NA	NA	NA
TEL09L-XR	NA	NA	NA	NA	NA	NA	NA	NA	NA
TEL09L-YP	NA	NA	1.52968	NA	NA	NA	NA	NA	NA
TEL09R-TR	NA	NA	NA	NA	NA	NA	NA	NA	NA
TEL09R-XC	NA	NA	NA	NA	NA	NA	NA	NA	NA
TEL09R-XR	NA	NA	NA	NA	NA	NA	NA	NA	NA
TEL10L-TR	NA	NA	NA	NA	NA	NA	NA	NA	NA
TEL10L-XC	NA	NA	NA	NA	NA	NA	NA	NA	NA
TEL10L-XR	NA	NA	NA	NA	NA	NA	NA	NA	NA
TEL10L-YP	NA	NA	NA	NA	NA	NA	NA	NA	NA
TEL10R-TR	NA	NA	NA	NA	NA	NA	NA	NA	NA
TEL10R-XC	NA	NA	NA	NA	NA	NA	NA	NA	NA
TEL10R-XR	NA	NA	NA	NA	NA	NA	NA	NA	NA
TEL11L-TR	NA	NA	NA	NA	NA	NA	NA	NA	NA
TEL11L-XC	NA	NA	NA	NA	NA	NA	NA	NA	NA
TEL11L-XR	NA	NA	NA	NA	NA	NA	NA	NA	NA
TEL11R-TR	NA	NA	1.75555	NA	NA	NA	NA	NA	NA
TEL11R-XC	NA	NA	NA	NA	NA	NA	NA	NA	NA
TEL11R-XR	NA	NA	NA	NA	NA	NA	NA	NA	NA
TEL12L-TR1	NA	NA	NA	NA	NA	NA	NA	NA	NA
TEL12L-TR2	NA	NA	NA	NA	NA	NA	NA	NA	NA
TEL12L-TR3	NA	NA	2.73383	NA	NA	NA	NA	NA	NA
TEL12L-XC	NA	NA	NA	NA	NA	NA	NA	NA	NA
TEL12L-XR	NA	NA	NA	NA	NA	NA	NA	NA	NA
TEL12L-YP1	NA	NA	NA	NA	NA	NA	NA	NA	NA
TEL12L-YP2	NA	NA	NA	NA	NA	NA	NA	NA	NA
TEL12R-TR1	NA	NA	NA	NA	NA	NA	NA	NA	NA
TEL12R-TR2	2.90933	NA	NA	NA	NA	NA	NA	NA	NA
TEL12R-XC	NA	NA	NA	NA	NA	NA	NA	NA	NA
TEL12R-XR	NA	NA	NA	NA	NA	NA	NA	NA	NA
TEL12R-YP1	NA	NA	NA	NA	NA	NA	NA	NA	NA
TEL12R-YP2	NA	NA	NA	NA	NA	NA	NA	NA	NA
TEL13L-TR1	NA	NA	NA	NA	NA	NA	NA	NA	NA
TEL13L-TR2	NA	NA	NA	NA	NA	NA	NA	NA	NA
TEL13L-XC	NA	NA	NA	NA	NA	NA	NA	NA	NA
TEL13L-XR	NA	NA	NA	NA	NA	NA	NA	NA	NA
TEL13L-YP	NA	NA	NA	NA	NA	NA	NA	NA	NA
TEL13R-TR	NA	NA	NA	NA	NA	NA	NA	NA	NA
TEL13R-XC	NA	NA	NA	NA	NA	NA	NA	NA	NA
TEL13R-XR	NA	NA	2.116	NA	NA	NA	NA	NA	NA
TEL14L-TR	NA	NA	NA	NA	NA	NA	NA	NA	NA
TEL14L-XC	NA	NA	NA	NA	NA	NA	NA	NA	NA
TEL14L-XR	NA	NA	NA	NA	NA	NA	NA	NA	NA
TEL14L-YP	NA	NA	NA	NA	NA	NA	NA	NA	NA
TEL14R-TR	NA	NA	NA	NA	NA	NA	NA	NA	NA
TEL14R-XC	NA	NA	NA	NA	NA	NA	NA	NA	NA
TEL14R-XR	NA	NA	NA	NA	NA	NA	NA	NA	NA
TEL15L-TR	NA	NA	NA	NA	NA	NA	NA	NA	NA
TEL15L-XC	NA	NA	NA	NA	NA	NA	NA	NA	NA
TEL15L-XR	NA	NA	NA	NA	NA	NA	NA	NA	NA
TEL15R-TR	NA	NA	NA	NA	NA	NA	NA	NA	NA
TEL15R-XC	NA	NA	NA	NA	NA	NA	NA	NA	NA
TEL15R-XR	NA	NA	NA	NA	NA	NA	NA	NA	NA
TEL15R-YP	NA	NA	NA	NA	NA	NA	NA	NA	NA
TEL16L-XC	NA	NA	NA	NA	NA	NA	NA	NA	NA
TEL16L-XR	NA	NA	NA	NA	NA	NA	NA	NA	NA
TEL16L-YP	NA	NA	NA	NA	NA	NA	NA	NA	NA
TEL16R-XC	NA	NA	NA	NA	NA	NA	NA	NA	NA
TEL16R-YP	NA	NA	NA	NA	NA	NA	NA	NA	NA
tF(GAA)B	NA	NA	NA	NA	NA	NA	NA	NA	NA
tF(GAA)D	NA	NA	NA	NA	NA	NA	NA	NA	NA
tF(GAA)F	NA	NA	NA	NA	NA	NA	NA	-1.45688	NA
tF(GAA)G	NA	NA	NA	NA	NA	NA	NA	NA	NA
tF(GAA)H1	NA	NA	NA	NA	NA	NA	NA	NA	NA
tF(GAA)H2	NA	NA	NA	NA	NA	NA	NA	NA	NA
tF(GAA)M	NA	NA	NA	NA	NA	NA	NA	NA	NA
tF(GAA)N	NA	NA	NA	NA	NA	NA	NA	NA	NA
tF(GAA)P1	NA	NA	NA	NA	NA	NA	NA	NA	NA
tF(GAA)P2	NA	NA	NA	NA	NA	NA	NA	NA	NA
tG(CCC)D	NA	NA	NA	1.26715	NA	NA	1.57042	2.60616	NA
tG(CCC)O	NA	NA	NA	NA	NA	NA	0.910049	2.30039	NA
tG(GCC)B	0.749257	1.25964	NA	0.678444	1.13317	NA	1.29095	1.76802	NA
tG(GCC)C	NA	NA	NA	NA	NA	NA	NA	NA	NA
tG(GCC)D1	NA	NA	NA	NA	NA	NA	NA	NA	NA
tG(GCC)D2	NA	1.30588	NA	NA	NA	NA	NA	1.82316	NA
tG(GCC)E	NA	NA	NA	NA	NA	NA	NA	NA	NA
tG(GCC)F1	NA	NA	NA	NA	NA	NA	NA	NA	NA
tG(GCC)F2	NA	NA	NA	NA	NA	NA	NA	NA	NA
tG(GCC)G1	NA	NA	NA	NA	NA	NA	NA	NA	NA
tG(GCC)G2	NA	NA	NA	NA	NA	NA	NA	NA	NA
tG(GCC)J1	NA	NA	NA	NA	NA	NA	NA	NA	NA
tG(GCC)J2	NA	NA	NA	NA	NA	NA	NA	NA	NA
tG(GCC)M	NA	NA	NA	NA	NA	NA	NA	NA	NA
tG(GCC)O1	NA	NA	NA	NA	NA	NA	NA	NA	NA
tG(GCC)O2	NA	NA	NA	NA	NA	NA	NA	NA	NA
tG(GCC)P1	NA	NA	NA	NA	NA	NA	NA	NA	NA
tG(GCC)P2	NA	NA	NA	NA	NA	NA	NA	NA	NA
tG(UCC)G	NA	NA	NA	1.34723	NA	NA	NA	1.55163	NA
tG(UCC)N	NA	NA	NA	NA	NA	NA	NA	1.63706	NA
tG(UCC)O	NA	NA	NA	NA	NA	NA	NA	1.82607	NA
tH(GUG)E1	NA	NA	NA	NA	0.732648	NA	1.61812	0.727724	NA
tH(GUG)E2	NA	0.871432	NA	NA	1.18298	1.84251	NA	1.56597	1.89105
tH(GUG)G1	NA	NA	NA	NA	1.09644	NA	NA	1.53702	2.00187
tH(GUG)G2	NA	NA	NA	NA	NA	NA	NA	1.38823	NA
tH(GUG)H	NA	NA	NA	NA	1.27259	NA	NA	1.572	NA
tH(GUG)K	NA	NA	NA	NA	1.48015	1.51604	NA	NA	NA
tH(GUG)M	NA	NA	NA	NA	NA	NA	NA	NA	NA
tI(AAU)B	NA	NA	NA	1.06421	NA	NA	NA	NA	NA
tI(AAU)D	NA	NA	NA	NA	NA	NA	NA	NA	NA
tI(AAU)E1	NA	NA	NA	NA	NA	NA	NA	NA	NA
tI(AAU)E2	NA	NA	NA	NA	NA	NA	NA	NA	NA
tI(AAU)G	NA	NA	NA	NA	NA	NA	NA	NA	NA
tI(AAU)I1	NA	NA	NA	NA	NA	NA	NA	NA	NA
tI(AAU)I2	NA	NA	NA	NA	NA	NA	NA	NA	NA
tI(AAU)L1	NA	NA	NA	NA	NA	NA	NA	NA	NA
tI(AAU)L2	NA	NA	NA	NA	NA	NA	NA	NA	NA
tI(AAU)N1	NA	NA	NA	NA	NA	NA	NA	NA	NA
tI(AAU)N2	NA	NA	NA	NA	NA	NA	NA	NA	NA
tI(AAU)P1	NA	NA	NA	NA	NA	NA	NA	NA	NA
tI(AAU)P2	NA	NA	NA	NA	NA	NA	NA	NA	NA
tI(UAU)D	-0.918192	NA	NA	NA	NA	NA	NA	NA	NA
tI(UAU)L	NA	NA	NA	NA	NA	NA	NA	NA	NA
tK(CUU)C	NA	0.651595	NA	NA	0.699307	NA	NA	NA	NA
tK(CUU)D1	NA	NA	NA	NA	NA	NA	NA	NA	NA
tK(CUU)D2	NA	NA	NA	NA	NA	NA	NA	NA	NA
tK(CUU)E1	NA	NA	NA	NA	NA	NA	NA	NA	NA
tK(CUU)E2	NA	NA	NA	NA	NA	NA	NA	NA	NA
tK(CUU)F	NA	NA	NA	NA	NA	NA	NA	NA	NA
tK(CUU)G1	NA	NA	NA	NA	NA	NA	NA	NA	NA
tK(CUU)G2	NA	NA	NA	NA	NA	NA	NA	NA	NA
tK(CUU)G3	NA	NA	NA	NA	NA	NA	NA	NA	NA
tK(CUU)I	NA	NA	NA	NA	NA	NA	NA	NA	NA
tK(CUU)J	NA	NA	NA	NA	NA	NA	NA	NA	NA
tK(CUU)K	NA	NA	NA	NA	NA	NA	NA	NA	NA
tK(CUU)M	NA	NA	NA	NA	NA	NA	NA	NA	NA
tK(CUU)P	NA	NA	NA	NA	NA	NA	NA	NA	NA
tK(UUU)D	NA	NA	NA	NA	NA	NA	NA	NA	NA
tK(UUU)G1	NA	NA	NA	NA	NA	NA	NA	NA	NA
tK(UUU)G2	NA	NA	NA	NA	NA	NA	NA	NA	NA
tK(UUU)K	NA	NA	NA	NA	NA	NA	NA	NA	NA
tK(UUU)L	NA	NA	NA	NA	NA	NA	NA	NA	NA
tK(UUU)O	NA	NA	NA	NA	NA	NA	NA	NA	NA
tK(UUU)P	NA	NA	NA	NA	NA	NA	NA	NA	NA
tL(CAA)A	NA	NA	NA	NA	NA	NA	NA	NA	1.62523
tL(CAA)C	NA	NA	NA	NA	NA	NA	NA	NA	NA
tL(CAA)D	NA	NA	NA	NA	NA	NA	NA	NA	NA
tL(CAA)G1	NA	NA	NA	NA	NA	NA	NA	NA	NA
tL(CAA)G2	NA	NA	NA	NA	NA	2.7887	NA	NA	NA
tL(CAA)G3	NA	NA	NA	NA	NA	NA	NA	NA	NA
tL(CAA)K	NA	NA	NA	NA	NA	NA	NA	NA	NA
tL(CAA)L	NA	NA	NA	NA	NA	NA	NA	NA	NA
tL(CAA)M	NA	NA	NA	NA	NA	NA	NA	NA	NA
tL(CAA)N	NA	NA	NA	NA	NA	NA	NA	NA	NA
tL(GAG)G	NA	NA	NA	NA	NA	NA	NA	2.03688	NA
tL(UAA)B1	NA	NA	NA	NA	NA	NA	NA	NA	1.61569
tL(UAA)B2	NA	NA	NA	NA	NA	NA	NA	1.2302	1.50894
tL(UAA)D	NA	NA	NA	NA	NA	NA	NA	1.95282	1.01513
tL(UAA)J	NA	NA	NA	NA	NA	NA	NA	NA	NA
tL(UAA)K	NA	NA	NA	NA	NA	NA	NA	NA	NA
tL(UAA)L	NA	NA	NA	NA	NA	NA	NA	NA	NA
tL(UAA)N	NA	NA	NA	NA	NA	NA	NA	NA	NA
tL(UAG)J	NA	NA	NA	NA	NA	NA	NA	NA	NA
tL(UAG)L1	NA	NA	NA	NA	NA	NA	NA	NA	NA
tL(UAG)L2	NA	NA	NA	NA	NA	NA	NA	NA	NA
TLC1	NA	NA	NA	0.589411	0.92857	0.811339	0.776875	1.15822	0.851336
tM(CAU)C	NA	NA	NA	NA	NA	NA	NA	NA	NA
tM(CAU)D	NA	NA	NA	NA	NA	NA	NA	NA	NA
tM(CAU)E	NA	NA	NA	NA	NA	NA	NA	NA	NA
tM(CAU)J1	NA	NA	NA	NA	NA	NA	NA	NA	NA
tM(CAU)J2	NA	NA	NA	NA	NA	NA	NA	NA	NA
tM(CAU)J3	NA	NA	NA	NA	NA	NA	NA	NA	NA
tM(CAU)M	NA	NA	NA	NA	NA	NA	NA	NA	NA
tM(CAU)O1	NA	NA	NA	NA	NA	NA	NA	NA	NA
tM(CAU)O2	NA	NA	NA	NA	NA	NA	NA	NA	NA
tM(CAU)P	NA	NA	NA	NA	NA	NA	NA	NA	NA
tN(GUU)C	NA	NA	NA	NA	1.49244	NA	NA	NA	NA
tN(GUU)F	NA	NA	NA	NA	NA	NA	NA	NA	NA
tN(GUU)G	NA	NA	NA	NA	NA	NA	NA	NA	NA
tN(GUU)K	NA	NA	NA	NA	NA	NA	NA	NA	NA
tN(GUU)L	NA	NA	NA	NA	NA	NA	NA	NA	NA
tN(GUU)N1	NA	NA	NA	NA	NA	NA	NA	NA	NA
tN(GUU)N2	NA	NA	NA	NA	NA	NA	NA	NA	NA
tN(GUU)O1	NA	NA	NA	NA	NA	NA	NA	NA	NA
tN(GUU)O2	NA	NA	NA	NA	NA	NA	NA	NA	NA
tN(GUU)P	NA	NA	NA	NA	NA	NA	NA	NA	NA
tP(AGG)C	NA	NA	NA	NA	NA	NA	NA	NA	NA
tP(AGG)N	NA	NA	NA	NA	NA	NA	NA	NA	NA
tP(UGG)A	NA	NA	NA	NA	-0.419159	NA	NA	NA	NA
tP(UGG)F	NA	NA	NA	NA	NA	NA	NA	NA	1.28401
tP(UGG)H	NA	NA	NA	NA	NA	NA	NA	-0.604728	NA
tP(UGG)L	NA	NA	NA	NA	NA	NA	NA	-1.46007	NA
tP(UGG)M	NA	NA	NA	NA	NA	NA	NA	NA	NA
tP(UGG)N1	NA	NA	NA	NA	NA	NA	NA	NA	NA
tP(UGG)N2	NA	NA	NA	NA	NA	NA	NA	NA	NA
tP(UGG)O1	NA	NA	NA	NA	NA	NA	NA	NA	NA
tP(UGG)O2	NA	NA	NA	NA	NA	NA	NA	NA	NA
tP(UGG)O3	NA	NA	NA	NA	NA	NA	NA	NA	NA
tQ(CUG)M	0.580152	NA	NA	1.07157	NA	NA	1.29088	1.42946	NA
tQ(UUG)B	NA	NA	NA	NA	NA	NA	NA	NA	NA
tQ(UUG)C	-0.519428	NA	NA	-0.328624	NA	NA	-0.00291478	NA	NA
tQ(UUG)D1	NA	NA	NA	NA	NA	NA	NA	NA	NA
tQ(UUG)D2	NA	NA	NA	NA	NA	NA	NA	NA	NA
tQ(UUG)D3	NA	NA	NA	NA	NA	NA	NA	NA	NA
tQ(UUG)E1	NA	NA	NA	NA	NA	NA	NA	NA	NA
tQ(UUG)E2	NA	NA	NA	NA	NA	NA	NA	NA	NA
tQ(UUG)H	NA	NA	NA	NA	NA	NA	NA	NA	NA
tQ(UUG)L	NA	NA	NA	NA	NA	NA	NA	NA	NA
tR(ACG)D	NA	NA	NA	NA	NA	NA	NA	NA	NA
tR(ACG)E	NA	NA	NA	NA	NA	NA	NA	NA	NA
tR(ACG)J	NA	NA	NA	NA	NA	NA	NA	NA	NA
tR(ACG)K	NA	NA	NA	NA	NA	NA	NA	2.45697	NA
tR(ACG)L	NA	NA	NA	NA	NA	NA	NA	NA	NA
tR(ACG)O	NA	NA	NA	NA	NA	NA	NA	NA	NA
tR(CCG)L	NA	NA	NA	NA	NA	NA	NA	NA	NA
tR(CCU)J	NA	NA	NA	NA	NA	NA	NA	NA	NA
tR(UCU)B	NA	NA	NA	NA	NA	NA	NA	0.710059	NA
tR(UCU)D	NA	NA	NA	NA	NA	NA	NA	NA	NA
tR(UCU)E	NA	NA	NA	NA	NA	NA	NA	NA	NA
tR(UCU)G1	NA	NA	NA	NA	NA	NA	NA	NA	NA
tR(UCU)G2	NA	NA	NA	NA	NA	NA	NA	NA	NA
tR(UCU)G3	NA	NA	NA	NA	NA	NA	NA	NA	NA
tR(UCU)J1	NA	NA	NA	NA	NA	NA	NA	NA	NA
tR(UCU)J2	NA	NA	NA	NA	NA	NA	NA	NA	NA
tR(UCU)K	NA	NA	NA	NA	NA	NA	NA	NA	NA
tR(UCU)M1	NA	NA	NA	NA	NA	NA	NA	NA	NA
tR(UCU)M2	NA	NA	NA	NA	NA	NA	NA	NA	NA
tS(AGA)A	NA	NA	NA	NA	0.680353	NA	0.884655	1.25916	2.06571
tS(AGA)B	NA	NA	NA	NA	NA	NA	NA	NA	NA
tS(AGA)D1	NA	NA	NA	NA	NA	NA	NA	1.49165	1.13491
tS(AGA)D2	NA	NA	NA	NA	NA	NA	NA	2.14765	1.34561
tS(AGA)D3	NA	NA	NA	NA	NA	NA	NA	NA	NA
tS(AGA)E	NA	NA	NA	NA	NA	NA	NA	NA	2.14724
tS(AGA)G	NA	NA	NA	NA	NA	NA	NA	NA	NA
tS(AGA)H	NA	NA	NA	NA	1.33526	NA	NA	1.51181	NA
tS(AGA)J	NA	NA	NA	NA	NA	NA	NA	NA	NA
tS(AGA)L	NA	NA	NA	NA	NA	NA	NA	NA	NA
tS(AGA)M	NA	NA	NA	NA	NA	NA	NA	NA	NA
tS(CGA)C	NA	NA	1.2866	NA	NA	1.04999	NA	1.13001	2.02862
tS(GCU)F	NA	NA	NA	NA	NA	2.15965	1.36994	NA	2.44756
tS(GCU)L	NA	NA	NA	NA	NA	NA	NA	NA	2.05416
tS(GCU)O	NA	NA	NA	NA	NA	NA	NA	NA	NA
tS(UGA)E	NA	NA	NA	NA	NA	1.31844	NA	1.24072	2.00511
tS(UGA)I	NA	NA	NA	NA	2.08337	1.9605	NA	2.12715	1.88313
tS(UGA)P	NA	NA	NA	NA	NA	NA	NA	NA	1.43399
tT(AGU)B	NA	NA	NA	NA	NA	NA	NA	NA	NA
tT(AGU)C	NA	NA	NA	NA	NA	NA	NA	NA	NA
tT(AGU)D	NA	NA	NA	NA	NA	NA	NA	NA	NA
tT(AGU)H	NA	NA	NA	NA	NA	NA	NA	NA	NA
tT(AGU)I1	NA	NA	NA	NA	NA	NA	NA	NA	NA
tT(AGU)I2	NA	NA	NA	NA	NA	NA	NA	NA	NA
tT(AGU)J	NA	NA	NA	NA	NA	NA	NA	NA	NA
tT(AGU)N1	NA	NA	NA	NA	NA	NA	NA	NA	NA
tT(AGU)N2	NA	NA	NA	NA	NA	NA	NA	NA	NA
tT(AGU)O1	NA	NA	NA	NA	NA	NA	NA	NA	NA
tT(AGU)O2	NA	NA	NA	NA	NA	NA	NA	NA	NA
tT(CGU)K	1.52826	1.49514	NA	1.47783	1.33264	NA	1.70581	2.09428	NA
tT(UGU)G1	NA	NA	NA	NA	NA	NA	NA	NA	NA
tT(UGU)G2	NA	NA	NA	NA	NA	NA	NA	NA	NA
tT(UGU)H	NA	NA	NA	NA	NA	NA	NA	NA	NA
tT(UGU)P	NA	NA	NA	NA	NA	NA	NA	NA	NA
tV(AAC)E1	NA	NA	NA	NA	NA	NA	NA	NA	NA
tV(AAC)E2	NA	NA	NA	0.807166	NA	NA	NA	NA	NA
tV(AAC)G1	NA	NA	NA	NA	NA	NA	NA	NA	NA
tV(AAC)G2	NA	NA	NA	NA	NA	NA	NA	NA	NA
tV(AAC)G3	NA	NA	NA	NA	NA	NA	NA	NA	NA
tV(AAC)H	NA	NA	NA	NA	NA	NA	NA	NA	NA
tV(AAC)J	NA	NA	NA	NA	NA	NA	NA	NA	NA
tV(AAC)K1	NA	NA	NA	NA	NA	NA	NA	NA	NA
tV(AAC)K2	NA	NA	NA	NA	NA	NA	NA	NA	NA
tV(AAC)L	NA	NA	NA	NA	NA	NA	NA	NA	NA
tV(AAC)M1	NA	NA	NA	NA	NA	NA	NA	NA	NA
tV(AAC)M2	NA	NA	NA	NA	NA	NA	NA	NA	NA
tV(AAC)M3	NA	NA	NA	NA	NA	NA	NA	NA	NA
tV(AAC)O	NA	NA	NA	NA	NA	NA	NA	NA	NA
tV(CAC)D	NA	NA	NA	NA	NA	NA	NA	NA	NA
tV(CAC)H	NA	NA	NA	NA	NA	NA	NA	NA	NA
tV(UAC)B	NA	NA	NA	1.32244	NA	NA	1.46819	NA	NA
tV(UAC)D	NA	NA	NA	NA	NA	NA	NA	NA	NA
tW(CCA)G1	-0.572572	NA	NA	0.471433	NA	NA	0.407896	1.27177	1.07433
tW(CCA)G2	NA	NA	NA	NA	NA	NA	NA	NA	NA
tW(CCA)J	NA	NA	NA	NA	NA	NA	NA	NA	NA
tW(CCA)K	NA	NA	NA	NA	NA	NA	NA	NA	NA
tW(CCA)M	NA	NA	NA	NA	NA	NA	NA	NA	NA
tW(CCA)P	NA	NA	NA	NA	NA	NA	NA	NA	NA
tX(XXX)D	NA	NA	NA	1.29769	NA	1.85623	1.85967	NA	2.3899
tY(GUA)D	NA	NA	NA	NA	1.01955	NA	NA	1.17785	NA
tY(GUA)F1	NA	NA	NA	NA	NA	NA	NA	NA	NA
tY(GUA)F2	NA	NA	NA	NA	NA	NA	NA	NA	NA
tY(GUA)J1	NA	NA	NA	NA	NA	NA	NA	NA	NA
tY(GUA)J2	NA	NA	NA	NA	NA	NA	NA	NA	NA
tY(GUA)M1	NA	NA	NA	NA	NA	NA	NA	NA	NA
tY(GUA)M2	NA	NA	NA	NA	NA	NA	NA	NA	NA
tY(GUA)O	NA	NA	NA	NA	NA	NA	NA	NA	NA
YAL001C	NA	1.77583	2.07649	NA	1.90804	NA	0.800884	2.61653	2.42441
YAL002W	NA	NA	1.66476	NA	NA	NA	1.71601	0.956393	1.81543
YAL003W	NA	NA	NA	NA	NA	NA	NA	NA	NA
YAL007C	NA	NA	NA	1.50956	NA	1.15497	1.0119	NA	NA
YAL008W	NA	NA	NA	NA	NA	NA	NA	NA	NA
YAL009W	NA	NA	2.36911	1.84744	2.43375	2.85363	2.03913	2.0079	3.33382
YAL010C	NA	NA	NA	NA	NA	1.9317	2.02821	2.03562	2.69802
YAL011W	2.0102	3.63639	3.05823	NA	NA	NA	2.00759	2.55674	1.80891
YAL012W	NA	NA	0.558329	NA	NA	0.814845	NA	NA	NA
YAL013W	NA	NA	NA	1.59838	NA	1.8529	2.06397	1.67534	1.71559
YAL014C	1.73803	NA	1.34401	1.18863	NA	NA	1.7625	NA	1.16083
YAL016W	NA	-0.682462	NA	NA	NA	0.853476	0.509669	NA	1.92756
YAL017W	NA	NA	NA	0.756252	0.780669	1.00193	1.63074	1.22722	2.37063
YAL019W	NA	NA	0.700588	NA	0.973023	1.24526	NA	1.11869	1.01142
YAL020C	NA	NA	NA	1.75961	NA	NA	1.92268	NA	NA
YAL021C	1.10962	NA	1.10878	1.17435	0.649806	1.52173	2.0721	1.24513	2.05953
YAL022C	NA	NA	NA	NA	NA	1.10504	1.22012	NA	1.12358
YAL023C	NA	NA	NA	NA	NA	0.972097	NA	NA	0.877618
YAL024C	NA	1.15301	NA	NA	1.49232	1.44904	NA	2.06989	2.40592
YAL025C	1.3092	2.22818	2.71828	NA	1.77446	1.64489	1.00023	1.68813	1.40629
YAL026C	NA	NA	NA	0.560542	NA	0.985494	NA	0.625944	0.678307
YAL027W	NA	NA	NA	NA	NA	NA	NA	NA	NA
YAL029C	NA	1.11657	0.99031	0.886941	1.79313	1.81673	1.40136	1.91559	2.11641
YAL030W	NA	NA	NA	NA	2.42747	NA	NA	2.51235	NA
YAL031C	NA	NA	NA	NA	1.54114	1.34419	1.42361	1.72128	2.28111
YAL032C	2.47287	NA	4.0847	NA	NA	2.68409	2.37917	NA	3.42156
YAL033W	NA	NA	NA	NA	NA	NA	NA	2.69159	NA
YAL034W-A	2.7958	NA	NA	2.97161	2.6666	NA	NA	NA	NA
YAL035W	NA	0.967099	NA	1.04061	1.46975	0.679205	1.08867	0.947872	0.623474
YAL036C	NA	NA	0.971038	0.752913	NA	1.68662	NA	NA	1.71252
YAL037W	NA	NA	NA	NA	NA	NA	NA	NA	NA
YAL038W	-0.355102	-0.228307	0.206739	-0.181496	-0.0520418	0.416822	-0.239856	NA	0.470957
YAL039C	NA	NA	NA	NA	NA	NA	2.80758	NA	2.14183
YAL040C	NA	NA	1.50188	1.42952	1.40709	2.02689	2.18002	2.56961	3.11146
YAL041W	NA	1.32396	1.35205	0.979098	1.29621	1.47486	1.12667	2.20212	1.5443
YAL042W	NA	NA	NA	0.609615	0.846991	NA	NA	0.746467	0.516236
YAL043C	NA	NA	NA	1.33917	1.44108	0.966644	1.30348	1.04143	1.4254
YAL044C	NA	0.826633	NA	0.808939	1.01237	1.12105	1.47054	1.76615	2.40308
YAL046C	NA	2.6177	2.38065	NA	NA	NA	NA	2.30638	1.66529
YAL047C	NA	NA	NA	NA	NA	NA	NA	1.96957	NA
YAL048C	NA	NA	NA	NA	NA	2.25097	1.77814	2.04991	2.27075
YAL049C	NA	NA	NA	NA	NA	NA	NA	1.49668	NA
YAL051W	NA	NA	NA	1.13382	NA	NA	1.68673	1.42513	0.856721
YAL053W	NA	NA	1.26554	NA	0.865012	1.13457	0.829244	NA	1.32288
YAL055W	2.86894	2.47123	NA	NA	NA	NA	NA	NA	NA
YAL056W	NA	NA	1.57538	1.3999	1.39832	1.91349	2.32869	1.99569	2.37548
YAL058W	NA	NA	NA	NA	NA	NA	1.55275	NA	NA
YAL059W	NA	NA	NA	NA	NA	NA	NA	NA	1.60691
YAL060W	NA	NA	1.93673	1.8099	0.769524	1.49157	1.85644	1.25559	2.13881
YAL061W	NA	NA	NA	NA	NA	NA	5.01362	2.63138	3.07168
YAL062W	2.01955	NA	NA	NA	NA	NA	NA	NA	NA
YALCdelta2	NA	NA	NA	NA	NA	NA	NA	NA	NA
YALWdelta1	NA	NA	NA	NA	NA	NA	NA	NA	NA
YAR002C-A	NA	NA	NA	NA	NA	0.882644	NA	NA	NA
YAR002W	NA	NA	NA	NA	NA	NA	1.49655	NA	NA
YAR003W	NA	NA	1.52482	NA	1.84811	2.43777	1.41955	2.2458	3.37891
YAR007C	NA	NA	1.2343	NA	NA	NA	NA	0.887285	1.02342
YAR008W	NA	NA	3.4959	2.06467	NA	2.46894	1.47452	NA	2.3761
YAR009C	0.254921	0.648804	0.877767	0.687006	1.15425	1.35992	1.08346	1.57637	1.88922
YAR010C	NA	0.331845	0.464323	0.388595	0.683834	0.938533	0.772986	1.21735	1.32256
YAR014C	1.22853	NA	NA	1.95889	1.03536	1.39	2.08937	NA	1.76058
YAR015W	NA	NA	1.11609	NA	NA	0.963705	1.1759	0.759636	2.03752
YAR018C	NA	NA	NA	NA	NA	NA	NA	1.78562	1.20993
YAR019C	NA	NA	NA	NA	NA	1.31024	NA	1.44954	2.15341
YAR027W	NA	NA	NA	NA	NA	NA	1.2038	1.28792	NA
YAR028W	NA	NA	NA	NA	NA	NA	1.4491	NA	2.93509
YAR031W	NA	NA	NA	NA	NA	NA	2.58935	NA	NA
YAR042W	NA	NA	NA	NA	1.07979	0.739545	1.53904	1.85318	1.42681
YARCdelta3	NA	NA	NA	NA	NA	NA	NA	NA	NA
YARCdelta4	NA	NA	NA	0.94859	1.0927	NA	0.809403	1.62793	NA
YARCdelta5	NA	NA	-0.352977	NA	NA	NA	NA	NA	0.259405
YARCdelta8	NA	NA	NA	NA	NA	NA	NA	NA	NA
YARWdelta6	NA	2.17709	NA	1.71824	2.8984	0.8957	1.36716	3.97318	1.06598
YARWdelta7	0.779324	NA	NA	1.22292	1.24325	NA	1.43554	1.75572	NA
YARWsigma1	NA	1.80529	NA	1.70888	2.13618	2.02543	1.8566	2.6238	NA
YBL001C	NA	NA	NA	NA	1.10716	NA	NA	1.25219	1.6354
YBL002W	0.873218	1.65481	3.04635	NA	0.741198	1.25667	NA	NA	1.98355
YBL003C	NA	1.81649	1.77125	0.38292	2.07273	1.9313	0.480278	2.04313	1.91896
YBL004W	NA	NA	NA	0.73436	NA	NA	0.788834	0.826636	NA
YBL005W	NA	NA	NA	NA	1.40169	NA	1.73326	3.12869	2.70387
YBL005W-A	NA	NA	NA	NA	NA	NA	NA	NA	NA
YBL005W-B	0.305831	NA	0.580619	0.693088	0.857666	1.19465	1.27464	1.48282	1.9781
YBL006C	NA	1.38538	2.10139	1.30049	1.55724	2.75197	1.58356	1.70663	2.88025
YBL007C	NA	NA	0.500083	0.592298	0.535604	0.855911	0.611235	0.820418	1.12815
YBL008W	NA	NA	1.127	1.25121	NA	NA	NA	NA	1.19007
YBL009W	NA	NA	1.23664	1.34054	NA	1.02192	NA	NA	1.27745
YBL010C	NA	NA	NA	NA	1.44142	1.92424	NA	NA	1.79794
YBL011W	0.973153	0.7964	2.20651	0.923218	NA	1.16222	0.815199	NA	1.59944
YBL014C	1.37426	1.01205	1.46299	1.51619	1.33207	1.51335	2.06491	1.94233	2.07517
YBL015W	NA	NA	NA	NA	NA	NA	NA	NA	1.77022
YBL016W	1.83398	NA	NA	1.89966	NA	NA	NA	NA	NA
YBL017C	NA	0.529494	NA	NA	0.493699	0.557505	NA	0.610571	0.843491
YBL018C	NA	NA	NA	NA	NA	NA	NA	NA	NA
YBL019W	NA	NA	NA	NA	NA	NA	NA	NA	NA
YBL020W	NA	NA	NA	NA	NA	1.25877	1.20167	1.35887	NA
YBL021C	1.97404	1.86593	3.16421	NA	NA	3.04313	NA	NA	3.18696
YBL022C	NA	NA	NA	NA	0.714243	0.746872	0.704208	1.03516	1.02109
YBL023C	NA	1.08683	1.76207	0.884677	NA	1.0881	NA	NA	1.15231
YBL024W	NA	NA	0.897355	0.799382	0.701362	0.988391	NA	NA	1.22373
YBL025W	NA	NA	NA	NA	NA	NA	NA	NA	NA
YBL026W	NA	NA	NA	NA	1.80651	2.29438	NA	NA	NA
YBL028C	2.62918	2.20999	2.69637	2.84737	NA	1.46778	2.00344	NA	NA
YBL029W	NA	NA	NA	NA	NA	NA	NA	NA	3.1569
YBL030C	NA	NA	0.738681	NA	NA	0.672411	NA	NA	0.79539
YBL031W	NA	NA	NA	NA	2.457	NA	NA	NA	1.94596
YBL032W	NA	NA	1.39277	0.963312	0.683025	1.49567	NA	NA	1.06669
YBL033C	NA	NA	NA	NA	NA	NA	2.21724	NA	1.3568
YBL034C	NA	NA	NA	1.32434	1.37342	NA	1.62644	1.67724	1.29823
YBL035C	NA	NA	NA	NA	NA	1.47108	1.11072	NA	1.31443
YBL037W	NA	NA	NA	NA	1.18079	1.23814	1.07529	1.65665	1.42488
YBL038W	NA	NA	NA	2.75215	NA	NA	2.89898	2.49084	1.46264
YBL039C	NA	NA	0.731991	0.680585	0.856323	0.81157	NA	NA	0.808076
YBL040C	NA	NA	NA	NA	NA	NA	NA	NA	NA
YBL041W	NA	NA	1.1034	0.937433	NA	1.41247	NA	NA	1.41103
YBL042C	NA	NA	1.03875	NA	NA	1.10707	0.800052	0.911375	0.990724
YBL043W	NA	NA	NA	NA	NA	NA	NA	NA	NA
YBL044W	NA	NA	NA	NA	NA	NA	NA	NA	NA
YBL045C	NA	NA	NA	NA	NA	NA	1.19982	NA	1.0995
YBL046W	NA	NA	NA	NA	NA	1.68361	1.62262	NA	2.13032
YBL047C	NA	0.627812	0.68121	0.479947	1.06055	0.652927	0.669733	1.50063	1.15216
YBL050W	NA	NA	NA	NA	NA	NA	NA	NA	NA
YBL051C	NA	0.795491	1.64375	1.11017	1.04901	1.58486	1.10209	0.701894	1.60955
YBL052C	2.60306	1.87979	2.51871	2.48037	1.58466	2.20753	2.47781	1.46052	2.19929
YBL054W	NA	1.58403	2.50093	1.94388	NA	2.10318	NA	NA	2.50053
YBL055C	NA	NA	NA	1.54846	NA	NA	1.46132	NA	1.24008
YBL056W	0.801658	NA	1.69386	0.923057	0.71368	1.52857	1.19196	1.08322	2.10868
YBL057C	NA	NA	NA	NA	1.35748	1.50304	1.36069	NA	1.60893
YBL058W	NA	NA	NA	NA	1.13419	NA	0.70888	NA	NA
YBL059W	NA	NA	NA	NA	NA	NA	NA	NA	NA
YBL060W	NA	NA	NA	NA	NA	NA	NA	NA	1.46998
YBL061C	NA	NA	NA	0.872403	1.20279	2.09082	1.10368	1.20276	2.09617
YBL063W	NA	2.07557	2.61752	1.37905	1.87782	1.64643	1.77253	2.07887	1.61273
YBL064C	NA	NA	NA	NA	NA	NA	NA	NA	NA
YBL066C	1.36096	0.981414	2.92566	NA	NA	1.91039	1.96015	1.09538	2.63847
YBL067C	NA	1.35217	1.62581	0.790166	1.11938	1.52744	1.22465	1.19873	1.48351
YBL068W	NA	NA	NA	NA	NA	NA	NA	-1.21239	NA
YBL069W	NA	NA	2.45577	NA	NA	1.80092	NA	NA	1.81736
YBL072C	NA	NA	NA	NA	NA	NA	NA	2.32264	NA
YBL074C	NA	NA	NA	NA	NA	NA	1.27262	NA	NA
YBL076C	NA	NA	0.854884	0.375497	NA	0.887378	-0.357795	NA	0.424311
YBL078C	NA	NA	NA	NA	NA	2.2212	NA	2.25915	2.29113
YBL079W	NA	0.648394	0.925999	1.13757	0.877178	0.949368	1.36335	1.16646	1.20807
YBL080C	NA	NA	NA	NA	NA	2.12277	NA	2.28418	2.14372
YBL081W	NA	1.91328	2.86077	NA	NA	2.84505	1.67994	1.98108	2.66318
YBL082C	NA	1.36845	NA	NA	NA	NA	NA	NA	NA
YBL084C	2.23996	1.53383	2.66083	1.99244	1.60819	2.56115	3.17945	2.42231	2.76618
YBL085W	1.17933	NA	0.828574	0.926802	NA	1.03743	1.44485	NA	1.65577
YBL086C	NA	NA	NA	NA	NA	NA	1.46286	NA	1.41531
YBL087C	-3.15203	NA	NA	-2.5567	NA	1.02455	-2.20483	NA	NA
YBL088C	NA	NA	0.844075	NA	NA	1.1023	1.02557	1.53804	1.29353
YBL089W	NA	NA	NA	NA	2.20821	NA	NA	2.02342	1.75284
YBL090W	NA	NA	NA	NA	NA	NA	NA	NA	NA
YBL091C	1.03466	NA	NA	1.23463	NA	NA	1.57558	NA	NA
YBL092W	NA	NA	0.80492	NA	NA	0.594925	NA	NA	NA
YBL093C	NA	NA	1.51069	NA	1.22203	NA	NA	NA	1.80854
YBL097W	NA	NA	0.86562	1.24886	1.43447	1.66545	1.92118	1.84266	2.2529
YBL098W	NA	NA	NA	1.50693	NA	NA	NA	NA	NA
YBL099W	NA	NA	0.960006	0.494677	NA	1.0299	0.630356	NA	1.06529
YBL100W-A	NA	NA	0.748196	0.628292	1.25983	1.01679	0.532231	1.24473	1.34492
YBL100W-B	NA	NA	NA	NA	NA	NA	NA	NA	NA
YBL101C	NA	NA	0.934295	NA	NA	1.20161	1.30776	0.984539	1.54882
YBL102W	NA	NA	NA	NA	1.66842	NA	1.39577	2.15438	1.40947
YBL103C	NA	2.13602	1.76595	1.8147	NA	2.11255	2.25595	3.27129	2.32057
YBL104C	NA	1.41454	NA	NA	1.22386	NA	NA	2.08424	1.69169
YBL105C	NA	1.23214	1.23791	0.979549	1.91087	1.54129	1.17558	2.26955	1.93731
YBL106C	NA	NA	NA	1.31772	1.45567	NA	1.26525	2.04569	1.76945
YBLCdelta7	NA	NA	NA	NA	NA	NA	NA	NA	NA
YBLCsigma1	NA	NA	NA	NA	NA	NA	NA	2.57005	NA
YBLCtau1	NA	NA	2.98585	NA	NA	NA	1.80376	3.10006	3.99731
YBLWdelta1	NA	NA	NA	NA	NA	NA	NA	NA	NA
YBLWdelta10	NA	NA	NA	NA	NA	NA	NA	NA	NA
YBLWdelta2	NA	NA	NA	NA	NA	NA	NA	4.08477	NA
YBLWdelta3	NA	NA	NA	NA	NA	NA	NA	NA	NA
YBLWdelta4	NA	NA	NA	NA	NA	NA	NA	NA	NA
YBLWdelta5	-1.64076	NA	NA	0.26696	1.6247	1.34122	-0.283975	2.70468	NA
YBLWdelta6	NA	NA	NA	NA	NA	NA	NA	NA	NA
YBLWdelta8	NA	NA	NA	NA	NA	NA	NA	NA	NA
YBLWdelta9	NA	NA	NA	NA	NA	NA	NA	NA	NA
YBLWtau1	NA	NA	NA	NA	NA	NA	NA	NA	NA
YBR001C	NA	NA	NA	1.37406	1.42101	1.30065	2.1401	1.6388	1.93779
YBR002C	NA	NA	NA	1.89213	1.39178	2.06957	1.97343	1.16488	2.3505
YBR003W	NA	NA	NA	NA	1.74026	NA	NA	2.07564	1.79841
YBR004C	NA	2.2633	NA	NA	NA	1.68249	NA	1.8659	NA
YBR005W	NA	NA	NA	NA	NA	NA	NA	1.74458	2.18058
YBR006W	NA	NA	NA	NA	NA	1.75698	NA	NA	NA
YBR007C	NA	NA	NA	NA	NA	NA	NA	1.96375	1.84793
YBR008C	NA	NA	NA	NA	NA	NA	NA	NA	NA
YBR009C	1.08416	1.58825	2.41238	1.20759	1.51786	2.10461	1.02207	1.35414	4.87517
YBR010W	2.17579	2.84459	4.25857	0.681691	0.7288	0.976911	0.986116	0.733205	2.4051
YBR011C	NA	-0.414684	NA	NA	NA	0.320088	NA	-0.614562	0.304285
YBR012W-A	NA	NA	NA	NA	NA	NA	NA	NA	NA
YBR012W-B	0.189885	0.299389	1.01449	0.534664	0.781482	1.52742	1.13069	1.19716	2.34489
YBR013C	NA	NA	NA	NA	NA	NA	NA	NA	NA
YBR014C	NA	NA	NA	NA	NA	NA	1.44536	NA	1.77908
YBR015C	NA	NA	0.853682	1.15973	0.700528	1.01315	NA	NA	0.874824
YBR016W	NA	1.02708	2.70381	1.2212	0.964555	2.29817	NA	0.951462	NA
YBR017C	NA	NA	0.761557	NA	0.695991	1.19969	NA	0.595311	0.869362
YBR020W	2.57669	NA	NA	NA	NA	NA	NA	NA	1.88738
YBR021W	NA	NA	NA	NA	NA	NA	NA	NA	2.21537
YBR022W	NA	NA	NA	NA	NA	NA	NA	2.40623	NA
YBR023C	NA	NA	NA	0.654421	0.880698	0.862175	NA	NA	0.561465
YBR024W	NA	NA	NA	NA	NA	NA	NA	NA	2.18585
YBR025C	-0.589198	NA	0.78342	NA	NA	0.734377	NA	-0.513419	0.584601
YBR026C	NA	NA	NA	NA	NA	NA	NA	1.18776	1.17868
YBR028C	1.43838	1.57624	2.46491	NA	NA	1.06313	1.31287	NA	1.3707
YBR029C	NA	NA	NA	NA	NA	1.65279	NA	NA	1.31578
YBR030W	NA	NA	NA	NA	1.59966	NA	NA	NA	1.51956
YBR034C	NA	1.49925	3.08252	NA	NA	1.88341	NA	NA	2.42535
YBR035C	NA	NA	NA	NA	NA	NA	NA	NA	NA
YBR036C	NA	NA	1.30361	0.867144	NA	1.46387	NA	NA	1.58977
YBR037C	NA	NA	NA	NA	1.69255	NA	NA	2.10166	2.28247
YBR038W	NA	0.922361	1.25634	0.910498	0.827398	1.15804	NA	1.11697	1.08115
YBR039W	NA	NA	NA	NA	NA	0.992428	1.17821	NA	0.809653
YBR040W	NA	NA	NA	NA	NA	NA	NA	NA	NA
YBR041W	NA	NA	NA	NA	NA	NA	NA	NA	NA
YBR042C	NA	NA	NA	NA	NA	NA	NA	NA	NA
YBR043C	NA	NA	NA	NA	1.03728	NA	1.20517	1.57445	1.3781
YBR044C	NA	NA	NA	NA	NA	NA	2.27496	2.0405	2.70267
YBR046C	NA	NA	NA	NA	NA	2.02632	NA	NA	2.47242
YBR047W	NA	NA	NA	NA	NA	NA	NA	NA	2.8102
YBR048W	NA	NA	NA	NA	NA	NA	NA	NA	NA
YBR049C	1.09872	1.68855	2.99794	1.10635	1.27375	1.23163	1.90743	1.6372	1.73229
YBR052C	NA	NA	1.60361	NA	NA	NA	NA	NA	1.42524
YBR053C	NA	NA	NA	NA	NA	NA	1.59021	NA	NA
YBR054W	NA	NA	NA	NA	NA	NA	2.25926	NA	1.96474
YBR055C	NA	NA	1.53932	1.2053	1.01679	1.8215	1.38471	1.14359	1.73967
YBR056W	NA	NA	NA	NA	NA	NA	NA	NA	NA
YBR057C	NA	1.51262	1.85846	2.94977	1.92345	1.90749	3.52267	1.83669	2.06294
YBR058C	NA	NA	NA	1.327	NA	NA	0.921099	1.21124	1.94349
YBR059C	NA	NA	0.809878	0.945705	NA	1.3202	1.15157	1.55453	1.81173
YBR060C	1.13706	2.09537	2.52922	NA	NA	1.10612	NA	NA	NA
YBR061C	NA	1.5415	2.02941	NA	NA	NA	NA	NA	NA
YBR062C	NA	NA	NA	NA	NA	NA	NA	NA	NA
YBR065C	NA	NA	NA	NA	1.58222	1.53485	1.13787	1.74777	1.28182
YBR066C	NA	NA	NA	1.62056	NA	2.24371	NA	NA	2.36147
YBR067C	NA	NA	1.27001	NA	NA	NA	0.655119	1.18541	1.88462
YBR068C	0.645801	0.527725	1.52488	1.41437	0.806732	1.93483	1.10583	1.04274	1.85793
YBR069C	NA	NA	NA	0.977293	NA	NA	1.29308	0.766591	0.907651
YBR070C	NA	NA	NA	NA	NA	1.64743	NA	NA	2.24941
YBR071W	1.75105	NA	2.47171	2.07946	1.51389	2.90935	NA	1.9251	2.7903
YBR072W	NA	NA	NA	NA	NA	NA	NA	2.70411	2.8863
YBR073W	0.944022	1.49812	1.0307	1.47725	1.66441	1.34292	1.22896	1.22175	1.20912
YBR074W	NA	NA	1.01338	NA	NA	1.53166	NA	0.619826	1.08251
YBR077C	NA	NA	NA	2.38016	NA	1.71863	1.7952	1.24672	2.10119
YBR078W	NA	NA	NA	NA	0.79606	NA	NA	NA	NA
YBR079C	NA	NA	1.01514	0.775327	0.391619	0.99353	NA	NA	0.894209
YBR080C	NA	NA	NA	NA	NA	NA	0.688816	NA	0.83024
YBR081C	1.26547	1.2218	1.34921	1.34413	1.50368	1.191	1.74147	1.60368	1.41355
YBR082C	NA	NA	NA	NA	NA	2.75246	NA	NA	NA
YBR083W	NA	NA	1.53334	1.57745	1.27239	2.3293	1.20316	NA	2.22432
YBR084C-A	NA	NA	NA	NA	NA	NA	NA	2.13056	-0.549034
YBR084W	NA	NA	NA	0.681332	NA	0.848997	NA	NA	NA
YBR085W	NA	NA	NA	NA	NA	NA	NA	NA	NA
YBR086C	NA	NA	1.33927	0.694996	0.721647	1.18637	NA	NA	0.895447
YBR087W	NA	NA	NA	NA	NA	1.72718	NA	NA	NA
YBR088C	NA	NA	NA	1.43883	NA	NA	1.21523	NA	NA
YBR090C	NA	NA	NA	NA	NA	NA	NA	2.48603	NA
YBR091C	NA	NA	NA	NA	NA	NA	NA	NA	NA
YBR092C	NA	NA	2.33483	NA	NA	1.07913	-0.691931	NA	NA
YBR093C	NA	NA	NA	NA	0.782278	1.13942	-0.730693	NA	NA
YBR094W	NA	NA	NA	1.12888	NA	1.2132	0.975024	NA	1.36835
YBR095C	NA	NA	2.46307	NA	NA	2.0494	NA	2.29983	2.12898
YBR096W	NA	NA	NA	NA	NA	NA	NA	NA	NA
YBR097W	NA	1.02374	NA	1.62114	1.18033	1.66713	1.82396	1.60461	1.98637
YBR101C	NA	NA	2.27226	1.42049	NA	2.75282	0.966013	NA	1.94779
YBR102C	NA	NA	NA	0.987617	1.22357	1.34913	1.30188	1.34393	1.43627
YBR103W	NA	NA	NA	1.5723	2.08687	NA	1.55485	3.06543	NA
YBR104W	1.38661	NA	NA	1.47086	NA	NA	NA	NA	1.77477
YBR105C	NA	2.10419	1.94538	2.34832	2.41091	1.97818	3.05966	4.098	4.28311
YBR106W	NA	NA	0.518782	0.566257	NA	NA	NA	NA	NA
YBR107C	NA	NA	NA	NA	NA	NA	NA	NA	1.81415
YBR109C	NA	NA	NA	NA	0.863489	1.57248	0.963145	0.919464	1.41004
YBR110W	NA	NA	NA	NA	NA	NA	NA	1.15741	1.02087
YBR111C	NA	NA	NA	1.24602	NA	1.74336	1.35998	NA	1.89215
YBR112C	1.2504	1.2511	1.99264	1.47702	NA	1.01122	1.49962	0.728367	1.27641
YBR114W	NA	NA	NA	NA	NA	NA	1.26721	1.88746	1.63249
YBR115C	NA	NA	0.829042	NA	NA	0.89272	0.779842	NA	1.11352
YBR119W	NA	NA	NA	NA	NA	NA	NA	NA	NA
YBR120C	NA	NA	NA	2.61949	NA	NA	NA	NA	NA
YBR121C	NA	NA	0.908366	0.46198	NA	0.850714	NA	NA	0.600792
YBR122C	NA	NA	NA	NA	1.56115	NA	1.62947	2.08506	1.82625
YBR123C	NA	NA	NA	NA	NA	NA	1.48759	1.29178	1.81522
YBR125C	NA	NA	NA	NA	1.16518	NA	1.2995	NA	1.39417
YBR126C	NA	NA	NA	NA	NA	NA	1.01894	1.10704	0.837814
YBR127C	NA	NA	NA	NA	NA	0.568862	NA	NA	0.618071
YBR128C	NA	NA	NA	NA	NA	NA	NA	NA	NA
YBR129C	2.12254	NA	1.89875	2.46627	1.55684	1.85878	2.46638	1.29224	1.48449
YBR130C	NA	NA	1.68787	1.65513	1.51385	2.3331	1.30652	NA	2.1332
YBR131W	NA	NA	NA	NA	NA	2.46752	NA	2.03323	3.04203
YBR132C	NA	NA	1.36284	NA	NA	1.36677	2.15385	1.39981	2.68028
YBR133C	NA	NA	1.05269	0.823882	1.56752	1.24224	0.993926	1.42367	1.50967
YBR135W	1.90184	2.49036	2.96874	NA	2.43789	NA	1.87357	2.47444	2.64752
YBR136W	NA	0.838777	1.14718	NA	NA	1.53188	1.13991	1.2815	1.92623
YBR137W	NA	NA	NA	NA	NA	NA	2.92395	NA	NA
YBR138C	NA	NA	NA	NA	NA	NA	NA	1.75044	1.62361
YBR139W	NA	NA	NA	NA	NA	1.30429	1.24256	NA	1.7829
YBR141C	0.780251	NA	NA	0.988601	1.1272	0.663072	1.32561	1.62181	1.01776
YBR142W	NA	NA	NA	NA	NA	NA	NA	NA	NA
YBR143C	0.854996	NA	1.04898	1.06572	NA	1.24336	NA	NA	0.917425
YBR145W	NA	NA	NA	NA	NA	NA	NA	NA	NA
YBR146W	NA	NA	NA	1.48455	NA	NA	1.28209	1.71368	2.01303
YBR149W	NA	NA	NA	NA	1.12608	NA	0.879074	NA	0.894251
YBR150C	1.16711	2.00415	1.36527	NA	2.00859	1.37909	1.74786	2.65222	2.77868
YBR151W	NA	NA	NA	NA	1.0689	NA	1.19556	1.19542	NA
YBR152W	NA	NA	2.7239	NA	NA	2.46209	2.3631	NA	2.87463
YBR153W	1.80315	NA	NA	1.8043	1.49488	2.20064	2.23828	1.6449	2.72851
YBR154C	NA	1.32378	1.17404	1.36102	NA	NA	NA	NA	NA
YBR155W	NA	NA	1.43463	1.15721	NA	1.55123	NA	NA	NA
YBR156C	NA	2.16393	NA	NA	2.04494	1.99659	NA	2.32322	2.3148
YBR157C	NA	1.73423	2.21417	NA	2.10163	2.19543	1.66735	2.704	3.41714
YBR158W	1.83771	2.03704	2.24949	1.62473	1.67974	1.89812	1.90526	2.18138	2.317
YBR159W	NA	NA	1.13459	NA	0.804114	NA	NA	NA	NA
YBR160W	NA	NA	NA	NA	NA	NA	NA	NA	NA
YBR161W	NA	NA	NA	2.10167	NA	1.79117	2.23568	NA	2.22213
YBR162C	1.54407	1.41727	3.25118	0.618873	0.370482	0.847889	0.681526	0.390878	0.930725
YBR162W-A	NA	1.427	NA	1.48515	2.01922	2.15019	1.57678	1.65563	2.11119
YBR163W	2.1623	3.07025	3.13092	NA	1.73546	NA	NA	1.55975	1.26467
YBR164C	NA	NA	NA	NA	NA	NA	NA	NA	NA
YBR165W	NA	NA	NA	NA	NA	2.05536	2.12783	1.40636	1.94623
YBR166C	NA	NA	NA	NA	NA	NA	1.34637	NA	NA
YBR167C	NA	NA	NA	NA	NA	2.61199	NA	NA	2.3102
YBR168W	NA	NA	2.48855	NA	NA	2.14279	NA	NA	2.19765
YBR169C	NA	NA	NA	NA	NA	1.25476	1.56853	1.33742	2.06072
YBR170C	NA	NA	NA	0.898231	NA	1.49209	1.33371	1.23413	1.50688
YBR171W	NA	NA	NA	NA	NA	1.61087	NA	NA	1.90153
YBR172C	NA	1.12674	2.3582	NA	1.59108	1.20115	0.71055	1.85686	1.60679
YBR173C	NA	NA	NA	NA	1.43103	2.6272	NA	NA	1.98201
YBR175W	NA	NA	1.98201	2.64707	NA	2.30313	2.15229	NA	2.89696
YBR176W	NA	NA	NA	NA	NA	NA	NA	1.77089	NA
YBR177C	NA	NA	1.23152	NA	NA	NA	NA	NA	1.0745
YBR179C	NA	NA	1.64076	1.13715	NA	1.99765	1.20534	2.18929	2.45949
YBR181C	NA	NA	NA	NA	NA	NA	NA	NA	NA
YBR182C	NA	NA	NA	NA	NA	NA	NA	NA	NA
YBR183W	NA	NA	NA	NA	NA	NA	2.20423	NA	1.70335
YBR185C	NA	NA	NA	NA	NA	1.81175	NA	NA	1.95348
YBR187W	NA	NA	NA	NA	NA	NA	NA	NA	NA
YBR188C	NA	NA	NA	NA	NA	NA	NA	NA	NA
YBR189W	NA	NA	-0.659125	NA	NA	NA	1.25797	NA	NA
YBR191W	NA	NA	NA	NA	NA	NA	NA	NA	NA
YBR192W	NA	NA	1.60025	1.96284	1.38873	NA	1.79574	NA	2.09681
YBR193C	NA	NA	NA	NA	2.50212	4.65308	NA	2.05083	3.27032
YBR194W	NA	NA	NA	NA	2.62527	NA	2.70938	NA	NA
YBR195C	NA	NA	NA	2.08597	NA	NA	2.51615	NA	NA
YBR196C	-0.5562	-0.248965	0.467829	NA	NA	0.641966	-0.387242	-0.275859	0.496433
YBR197C	NA	NA	NA	NA	NA	NA	1.69517	NA	NA
YBR198C	NA	1.63273	1.56735	0.881125	1.34257	1.2289	1.35282	1.68768	1.39027
YBR199W	NA	NA	1.17693	0.95418	1.21494	1.92307	NA	0.976343	1.79104
YBR200W	NA	NA	2.33057	NA	NA	2.60942	NA	NA	2.6077
YBR201W	NA	NA	NA	NA	2.49047	3.02692	NA	NA	2.83335
YBR202W	1.41807	1.98841	2.39184	0.986262	NA	NA	1.16999	NA	1.36292
YBR204C	NA	NA	NA	NA	NA	NA	NA	NA	NA
YBR205W	NA	NA	0.85604	0.732903	NA	1.26847	NA	NA	NA
YBR207W	NA	NA	NA	1.21129	NA	1.51587	1.89083	1.17667	2.1783
YBR208C	NA	NA	NA	NA	NA	NA	1.23632	NA	1.38264
YBR210W	NA	NA	NA	NA	1.16036	2.38217	NA	NA	NA
YBR211C	NA	2.25998	2.23725	NA	NA	1.69824	NA	NA	NA
YBR212W	1.31629	NA	1.34957	1.39179	NA	1.79444	1.56227	1.28174	1.67409
YBR213W	NA	NA	NA	NA	NA	NA	NA	NA	2.45996
YBR214W	NA	NA	NA	NA	NA	NA	1.5327	1.69821	2.11583
YBR215W	NA	NA	NA	NA	NA	1.73808	NA	NA	2.22911
YBR216C	NA	NA	NA	NA	NA	NA	NA	NA	2.26378
YBR217W	NA	NA	NA	NA	NA	NA	1.74458	NA	NA
YBR218C	NA	NA	0.39391	NA	NA	NA	NA	NA	0.492039
YBR220C	NA	NA	NA	1.08706	NA	1.60139	1.05433	NA	NA
YBR221C	NA	NA	1.25923	0.558072	NA	0.877472	0.493852	NA	1.18184
YBR222C	NA	NA	NA	NA	NA	0.861979	NA	NA	0.904485
YBR223C	NA	NA	NA	NA	NA	NA	NA	NA	NA
YBR225W	2.20117	NA	2.22147	3.19677	NA	1.84817	3.23903	2.54958	3.09784
YBR227C	NA	NA	NA	NA	1.55794	NA	NA	1.669	NA
YBR228W	NA	NA	NA	NA	NA	NA	1.91503	3.10158	NA
YBR229C	NA	NA	NA	NA	NA	0.963645	NA	NA	1.30113
YBR230C	NA	NA	NA	NA	NA	NA	NA	NA	NA
YBR231C	NA	NA	NA	2.51992	NA	NA	2.08055	2.71834	2.37685
YBR233W	NA	2.60536	2.60799	1.44669	2.29465	2.85258	1.35101	2.26621	3.08095
YBR234C	NA	NA	0.66785	0.930124	NA	0.703345	0.789279	0.689055	1.00732
YBR235W	NA	1.08893	NA	NA	NA	0.864406	NA	1.45519	2.216
YBR236C	NA	NA	NA	NA	NA	1.75777	NA	NA	2.69527
YBR237W	1.68868	NA	1.9037	2.15576	NA	1.75439	2.33801	NA	1.81953
YBR238C	1.34481	1.22237	3.33453	1.22783	1.08348	2.23894	1.73101	1.304	2.85414
YBR239C	NA	NA	NA	NA	NA	NA	1.65598	NA	2.26434
YBR241C	NA	NA	NA	NA	NA	NA	NA	NA	NA
YBR242W	2.9108	NA	NA	2.89704	NA	NA	NA	NA	NA
YBR243C	NA	NA	1.09823	NA	NA	1.17996	NA	NA	NA
YBR244W	NA	NA	NA	NA	NA	2.00576	NA	NA	1.8881
YBR245C	NA	NA	1.20044	0.962605	NA	0.965904	0.759139	NA	1.07857
YBR246W	NA	NA	NA	NA	NA	NA	NA	NA	NA
YBR247C	NA	NA	1.45242	NA	1.78879	NA	1.27814	NA	1.18445
YBR248C	NA	NA	1.16913	NA	NA	1.15964	NA	1.048	2.0439
YBR249C	NA	NA	0.510709	0.726951	0.551573	NA	NA	-0.699773	NA
YBR251W	NA	NA	NA	1.57568	NA	2.92568	1.84563	NA	3.04814
YBR252W	NA	NA	1.55578	NA	NA	NA	NA	NA	1.52179
YBR253W	NA	NA	NA	NA	2.13686	NA	2.12184	2.26768	NA
YBR254C	NA	NA	2.86316	NA	NA	2.83699	NA	NA	NA
YBR255W	NA	NA	NA	1.47245	NA	2.33966	NA	1.20372	2.54918
YBR256C	NA	NA	NA	NA	NA	1.41287	NA	1.20056	1.25046
YBR257W	NA	NA	NA	NA	NA	NA	2.28955	NA	NA
YBR258C	NA	NA	NA	NA	2.94392	NA	NA	2.69281	NA
YBR259W	NA	2.04077	2.78181	NA	1.77454	2.78797	NA	2.26006	3.86001
YBR260C	NA	NA	1.55513	NA	NA	1.53856	1.69168	NA	1.61546
YBR261C	NA	NA	NA	NA	NA	1.2541	NA	NA	1.52419
YBR262C	NA	2.76154	NA	NA	2.70856	3.57943	1.41532	3.67167	2.71233
YBR263W	NA	NA	NA	NA	NA	NA	NA	NA	0.548613
YBR264C	NA	NA	NA	NA	NA	NA	NA	NA	2.60268
YBR265W	NA	1.43756	3.10818	1.34206	NA	1.89632	NA	NA	1.44623
YBR267W	NA	NA	1.64472	NA	1.5353	1.59818	NA	1.29903	1.91074
YBR268W	NA	NA	NA	NA	3.30672	1.87839	NA	2.91174	1.85807
YBR269C	NA	NA	NA	NA	NA	NA	NA	NA	1.69297
YBR270C	NA	NA	NA	NA	NA	NA	1.79967	1.70076	2.12404
YBR271W	NA	NA	NA	NA	1.88812	1.37605	NA	NA	2.41084
YBR272C	NA	NA	2.14275	1.7255	NA	1.80383	2.2723	NA	2.51746
YBR273C	NA	NA	1.52561	NA	1.23093	2.0287	NA	NA	NA
YBR274W	NA	NA	2.83656	NA	NA	2.50477	NA	NA	2.87863
YBR275C	NA	NA	0.960773	NA	NA	1.24462	1.24947	0.764452	1.68897
YBR276C	1.22732	1.11435	1.12266	1.07163	1.33417	1.23768	1.24357	1.59164	1.80404
YBR278W	NA	2.85148	NA	NA	2.99678	2.07258	NA	3.15229	2.46687
YBR279W	NA	NA	2.83088	NA	1.47087	2.36237	NA	1.50957	2.64208
YBR280C	NA	NA	NA	NA	NA	NA	NA	NA	1.35306
YBR281C	NA	NA	0.99734	NA	NA	1.22403	NA	NA	1.2354
YBR282W	NA	NA	NA	NA	NA	2.38454	NA	2.07505	NA
YBR283C	NA	NA	0.628327	0.782742	NA	0.693009	NA	NA	NA
YBR286W	NA	NA	0.773171	NA	NA	0.677276	NA	NA	0.666083
YBR287W	NA	NA	NA	1.09158	0.969602	NA	0.93159	0.893056	1.48232
YBR288C	NA	NA	NA	2.57595	1.17432	1.17676	1.94278	NA	1.2595
YBR289W	NA	NA	NA	3.02351	NA	2.91913	2.52239	NA	3.46092
YBR290W	NA	NA	NA	1.12679	1.65534	2.47742	1.64727	2.25377	2.1449
YBR291C	NA	NA	2.25718	NA	NA	NA	NA	NA	NA
YBR293W	NA	NA	NA	NA	NA	NA	1.50478	1.94552	2.24343
YBR295W	NA	NA	NA	NA	NA	NA	1.55609	1.75471	2.71861
YBR296C	NA	NA	1.11568	1.18863	1.56007	2.43573	NA	1.30052	1.67008
YBR297W	NA	NA	NA	NA	NA	NA	NA	NA	NA
YBR298C	NA	NA	NA	NA	NA	NA	NA	NA	NA
YBRCdelta11	NA	NA	NA	NA	NA	NA	NA	NA	NA
YBRCdelta14	NA	NA	NA	NA	NA	NA	NA	NA	NA
YBRCdelta18	NA	NA	NA	NA	NA	NA	NA	NA	NA
YBRCdelta19	NA	NA	NA	NA	NA	NA	NA	3.77608	NA
YBRCtau2	NA	NA	NA	NA	NA	NA	NA	NA	NA
YBRWdelta12	NA	2.25798	NA	NA	3.26234	NA	NA	2.23044	1.39156
YBRWdelta13	NA	NA	0.884134	1.08535	1.35668	0.852807	1.81779	1.96038	0.934759
YBRWdelta15	NA	NA	2.41229	NA	NA	NA	NA	NA	2.61854
YBRWdelta16	NA	NA	NA	NA	NA	NA	NA	NA	NA
YBRWdelta17	NA	NA	NA	NA	NA	NA	NA	NA	NA
YBRWtau2	NA	NA	NA	NA	NA	NA	NA	NA	NA
YCL001W	NA	NA	1.91581	1.45462	NA	1.9239	NA	NA	NA
YCL002C	NA	1.70543	1.59624	2.60124	2.01359	2.01742	1.48515	1.95009	2.42689
YCL004W	1.56979	NA	NA	1.75623	NA	NA	1.71798	1.76873	1.83419
YCL005W	NA	NA	NA	NA	1.52836	NA	NA	NA	2.34469
YCL008C	NA	NA	NA	NA	1.73754	NA	NA	NA	NA
YCL009C	NA	NA	NA	NA	NA	NA	NA	NA	NA
YCL010C	NA	NA	NA	NA	NA	1.41911	1.30711	NA	2.02071
YCL011C	NA	0.523234	1.26777	0.729617	1.11049	1.2847	0.697679	0.773032	1.84798
YCL014W	NA	NA	0.854856	NA	NA	0.79115	0.915155	0.93256	1.68566
YCL016C	NA	NA	NA	NA	NA	NA	NA	NA	1.92334
YCL017C	NA	NA	NA	NA	0.890705	NA	NA	1.11513	0.570733
YCL018W	NA	NA	NA	NA	NA	NA	NA	NA	NA
YCL019W	NA	NA	0.885141	0.937997	0.915482	1.48033	0.782926	0.5323	1.65549
YCL020W	NA	NA	NA	NA	NA	NA	NA	NA	NA
YCL024W	NA	NA	1.42406	1.5614	NA	1.31803	1.31627	1.18879	1.45651
YCL025C	1.26492	1.34834	2.56247	NA	NA	NA	1.72532	1.54365	2.53502
YCL027W	NA	NA	NA	NA	NA	2.26139	NA	NA	NA
YCL028W	NA	NA	NA	NA	NA	0.993067	NA	NA	0.703918
YCL029C	NA	NA	NA	NA	1.78018	NA	1.2297	1.98211	1.39563
YCL030C	NA	NA	1.13226	NA	0.46563	0.717923	0.441297	0.812835	0.788928
YCL031C	NA	1.35857	1.98189	1.15381	1.99322	2.51227	NA	1.29311	2.65099
YCL032W	NA	NA	NA	2.30802	NA	2.60289	2.16392	NA	NA
YCL033C	NA	NA	NA	NA	NA	NA	NA	NA	NA
YCL034W	NA	NA	1.31417	1.81538	NA	1.86989	1.91936	2.19104	2.07238
YCL035C	NA	NA	0.980181	NA	NA	1.0162	NA	1.4451	0.96074
YCL036W	NA	NA	NA	2.00404	NA	1.29098	1.76611	NA	NA
YCL037C	NA	0.830015	1.33903	0.895036	1.05696	1.66563	NA	0.706081	1.23342
YCL038C	NA	NA	NA	NA	NA	NA	1.655	NA	NA
YCL039W	NA	NA	NA	NA	NA	NA	1.49865	1.35567	1.99098
YCL040W	NA	NA	NA	NA	NA	NA	1.0008	0.934497	1.56271
YCL043C	NA	NA	-0.496504	NA	NA	NA	-0.461457	NA	-0.46847
YCL044C	NA	NA	1.58567	NA	NA	1.53875	NA	NA	1.84346
YCL045C	NA	NA	NA	NA	0.965577	0.836469	NA	NA	0.97354
YCL047C	NA	NA	NA	NA	NA	NA	NA	NA	NA
YCL049C	NA	NA	NA	NA	NA	NA	NA	1.96063	NA
YCL050C	NA	NA	NA	0.875849	NA	NA	NA	-0.943123	NA
YCL051W	NA	NA	2.37903	1.62478	1.20121	1.96381	1.51351	1.51436	2.73567
YCL052C	NA	NA	1.3243	NA	NA	1.67018	NA	0.91535	2.07259
YCL054W	NA	1.19837	2.20394	1.16173	1.24286	1.94751	1.11971	1.58028	1.83635
YCL055W	NA	NA	NA	2.16244	NA	1.39607	NA	NA	NA
YCL056C	NA	NA	NA	NA	NA	NA	NA	NA	NA
YCL057W	NA	NA	1.16378	0.791683	NA	1.01793	0.592589	0.755692	1.27351
YCL059C	NA	NA	1.57508	1.11551	1.44641	1.72141	1.09926	NA	1.09788
YCL061C	NA	1.72424	1.64416	NA	2.02733	2.31301	1.16978	2.00427	2.12535
YCL063W	2.58381	2.85823	4.11004	1.69136	NA	NA	1.53462	1.62754	2.82362
YCL064C	NA	NA	NA	0.716423	0.776965	0.770375	0.647191	0.66352	0.874435
YCLCdelta1	NA	NA	NA	NA	NA	NA	NA	NA	NA
YCLWdelta2a	NA	NA	NA	NA	NA	NA	NA	NA	NA
YCLWdelta2b	NA	NA	NA	NA	NA	NA	NA	NA	NA
YCLWdelta3	NA	NA	NA	NA	NA	NA	NA	NA	NA
YCLWdelta4	NA	NA	NA	NA	NA	NA	NA	NA	NA
YCLWdelta5	NA	NA	NA	NA	NA	NA	NA	NA	NA
YCLWomega1	NA	NA	NA	NA	NA	NA	NA	NA	NA
YCLWomega2	NA	NA	NA	NA	NA	NA	NA	NA	NA
YCR002C	NA	NA	NA	1.20337	NA	NA	1.22227	NA	NA
YCR003W	NA	NA	NA	NA	NA	2.47403	NA	1.90229	NA
YCR004C	NA	NA	2.11778	NA	NA	0.782515	0.96892	NA	1.31163
YCR005C	NA	NA	NA	1.57841	0.986443	1.51828	2.66734	2.08872	2.58239
YCR007C	NA	NA	NA	NA	NA	NA	NA	NA	NA
YCR008W	1.0073	0.947423	1.65166	0.959733	1.12263	1.38473	0.947639	1.0913	1.14333
YCR009C	NA	NA	1.71878	0.953319	1.14241	2.16105	NA	NA	2.29347
YCR011C	NA	NA	NA	0.534593	NA	0.685859	0.707852	0.703771	0.958725
YCR012W	-0.341335	-0.495266	0.154116	NA	NA	0.536927	-0.211883	-0.37021	0.321493
YCR015C	NA	NA	NA	1.24018	2.00532	2.4621	1.39331	2.68322	2.71782
YCR016W	NA	NA	2.04725	NA	NA	1.86085	NA	NA	2.19597
YCR017C	NA	NA	NA	NA	NA	0.883867	NA	NA	1.05316
YCR019W	NA	NA	NA	NA	NA	NA	NA	NA	NA
YCR020C	NA	NA	NA	NA	NA	NA	NA	NA	NA
YCR020C-A	NA	NA	NA	NA	NA	NA	2.123	NA	3.41464
YCR021C	NA	NA	NA	NA	NA	NA	NA	NA	NA
YCR023C	NA	NA	NA	1.90141	1.2324	1.66197	1.97809	1.76125	1.6928
YCR024C	NA	NA	1.92335	NA	NA	2.02856	NA	NA	2.41449
YCR024C-A	0.781671	1.33703	1.22367	0.910304	1.30561	1.11108	1.03799	1.47553	1.57733
YCR026C	NA	NA	NA	1.05993	1.50002	1.7189	1.51517	1.66323	2.48166
YCR027C	NA	NA	NA	NA	NA	NA	NA	NA	NA
YCR028C	NA	NA	NA	NA	NA	NA	NA	NA	1.009
YCR030C	NA	NA	NA	0.807488	NA	0.639544	1.30673	1.52384	0.800207
YCR031C	NA	NA	NA	NA	NA	NA	NA	NA	NA
YCR033W	NA	2.00862	0.58944	0.888717	2.23979	NA	1.04152	3.05115	1.00275
YCR034W	NA	NA	1.34981	NA	NA	0.994935	NA	NA	NA
YCR035C	NA	NA	2.07413	1.8161	NA	2.07837	2.22222	NA	1.29938
YCR036W	NA	NA	NA	NA	NA	NA	1.50152	1.62119	NA
YCR037C	NA	NA	1.43023	NA	NA	1.25282	1.39488	1.58161	1.56643
YCR038C	NA	NA	NA	NA	2.94392	NA	NA	3.29635	2.82367
YCR042C	NA	NA	1.37758	1.39437	1.21298	1.94259	1.29025	1.47468	1.92235
YCR043C	NA	NA	2.16521	NA	NA	1.91189	NA	NA	1.96577
YCR044C	NA	NA	NA	NA	NA	NA	NA	NA	NA
YCR047C	NA	1.82215	1.25486	NA	1.95983	1.33874	1.75441	2.0909	1.79884
YCR048W	NA	NA	1.27209	NA	NA	1.46192	1.13928	1.10986	1.71312
YCR051W	NA	NA	NA	NA	NA	NA	NA	NA	1.37855
YCR052W	NA	NA	0.917155	NA	NA	1.42567	NA	1.11094	1.47496
YCR053W	NA	NA	NA	NA	NA	0.714543	-0.587724	NA	NA
YCR054C	NA	NA	NA	NA	NA	NA	NA	NA	NA
YCR059C	1.266	0.667809	1.14407	1.23269	0.786542	1.29827	1.23932	0.676899	1.14992
YCR060W	NA	NA	NA	NA	NA	NA	NA	2.15479	NA
YCR061W	NA	NA	NA	NA	NA	NA	NA	1.20402	1.30287
YCR063W	NA	NA	NA	NA	NA	NA	NA	1.86815	2.08361
YCR065W	1.25996	1.34329	1.96874	1.58065	1.35924	1.65977	1.9524	2.21042	2.60791
YCR066W	NA	NA	2.67843	NA	NA	2.87987	2.40862	NA	2.81094
YCR067C	NA	NA	NA	NA	NA	NA	NA	NA	0.985443
YCR068W	NA	NA	NA	NA	NA	NA	NA	NA	NA
YCR069W	NA	NA	NA	0.856969	0.773562	1.36976	1.2361	1.2979	1.70588
YCR071C	NA	2.16969	1.9525	2.72212	2.32826	NA	2.67868	2.13358	NA
YCR072C	NA	1.4222	1.50372	NA	1.45769	1.18094	NA	1.49493	1.25915
YCR073C	NA	1.94436	1.20773	NA	1.36032	NA	1.90375	1.7297	1.55278
YCR075C	NA	NA	NA	NA	NA	NA	NA	NA	NA
YCR076C	3.27943	3.3421	NA	2.6182	2.55251	NA	2.66796	2.14924	NA
YCR077C	NA	0.816504	1.44142	1.10799	1.06184	1.53741	0.815841	0.863742	1.2265
YCR079W	NA	NA	NA	NA	NA	NA	1.80708	NA	2.99946
YCR081W	NA	NA	1.92088	1.07114	NA	2.19594	1.55793	1.27711	2.8803
YCR082W	NA	1.94673	1.52586	1.52639	2.24865	2.08566	1.37791	1.871	1.78381
YCR083W	NA	NA	2.65012	NA	NA	NA	NA	NA	2.63671
YCR084C	NA	NA	1.54061	0.857517	0.605502	0.980735	NA	NA	1.01702
YCR086W	NA	NA	NA	NA	NA	NA	NA	NA	NA
YCR088W	NA	NA	0.574707	NA	NA	0.66014	0.500146	NA	0.91457
YCR089W	NA	NA	NA	NA	1.4162	NA	NA	1.28026	0.948193
YCR090C	NA	NA	1.90944	2.27995	1.32084	2.35376	2.24947	NA	2.32192
YCR091W	NA	NA	2.72544	NA	NA	2.45817	NA	1.92392	3.53938
YCR092C	NA	NA	NA	NA	0.982303	NA	1.06585	NA	NA
YCR093W	0.891894	NA	NA	1.38992	0.73903	0.828561	1.49824	0.779518	1.43753
YCR094W	NA	NA	NA	NA	NA	0.899591	NA	NA	1.14259
YCR095C	NA	NA	NA	NA	NA	NA	1.86621	2.357	1.56093
YCR098C	NA	NA	NA	NA	NA	NA	NA	NA	NA
YCR101C	NA	NA	NA	NA	NA	1.93538	NA	NA	3.43159
YCR106W	NA	NA	NA	NA	NA	NA	NA	NA	1.57998
YCRCdelta14	NA	NA	NA	NA	NA	NA	NA	NA	NA
YCRCdelta6	NA	NA	NA	NA	NA	NA	NA	NA	NA
YCRCdelta7	NA	NA	NA	NA	NA	NA	NA	NA	NA
YCRCtau1	NA	NA	NA	NA	NA	NA	NA	NA	NA
YCRWdelta10	NA	NA	NA	NA	NA	NA	NA	NA	NA
YCRWdelta11	NA	NA	NA	NA	3.51652	NA	NA	NA	NA
YCRWdelta12	NA	NA	NA	NA	NA	NA	NA	NA	NA
YCRWdelta13	NA	NA	NA	NA	NA	NA	NA	NA	NA
YCRWdelta8	NA	NA	NA	NA	NA	NA	NA	NA	NA
YCRWdelta9	NA	NA	NA	NA	NA	NA	NA	NA	NA
YCRWomega3	NA	NA	NA	NA	NA	NA	NA	NA	NA
YDL001W	NA	NA	NA	NA	NA	2.72212	NA	NA	2.85577
YDL002C	2.12625	2.87733	4.05378	NA	2.05637	2.24001	2.24201	1.9648	2.44835
YDL003W	1.30855	NA	NA	1.43846	1.96121	1.5354	1.8677	1.69693	1.58172
YDL004W	NA	NA	2.32738	NA	NA	2.72437	NA	NA	2.12808
YDL005C	NA	NA	2.64771	NA	NA	3.03415	NA	1.29694	3.1895
YDL006W	NA	NA	NA	1.8743	1.18842	1.79151	1.99405	NA	1.90702
YDL007W	NA	NA	0.870121	0.663627	NA	1.0047	NA	NA	0.962171
YDL008W	NA	NA	NA	2.53045	2.17197	NA	NA	NA	NA
YDL010W	NA	NA	NA	NA	NA	NA	1.44156	NA	2.23275
YDL012C	NA	NA	NA	NA	1.3896	2.38444	NA	1.34661	2.75769
YDL013W	NA	NA	NA	1.47684	2.25795	1.55579	1.80045	2.41717	1.90745
YDL014W	NA	0.532853	1.62528	0.952695	0.611318	0.825036	NA	NA	0.402855
YDL015C	NA	NA	0.747736	NA	NA	0.930138	NA	NA	NA
YDL017W	NA	NA	NA	NA	2.41629	NA	NA	NA	NA
YDL018C	NA	NA	NA	NA	NA	NA	NA	NA	1.70921
YDL019C	NA	NA	NA	NA	1.1737	1.37626	1.61204	1.18708	2.07314
YDL020C	1.01886	NA	NA	0.927905	1.18397	1.51541	1.24583	2.07313	2.40236
YDL021W	NA	NA	NA	NA	NA	NA	2.11978	NA	NA
YDL022W	NA	NA	1.09784	NA	NA	1.38635	0.943321	0.593581	2.11988
YDL025C	-2.1143	NA	NA	-1.71513	NA	1.50553	-0.352461	1.71839	1.90537
YDL027C	NA	NA	NA	1.69622	NA	1.38513	NA	2.0509	1.65602
YDL028C	NA	NA	NA	NA	1.47078	1.2105	0.827734	2.27252	1.55514
YDL029W	NA	NA	NA	NA	NA	0.877598	NA	NA	NA
YDL030W	1.75108	NA	NA	2.05389	NA	NA	2.12284	1.95009	NA
YDL031W	NA	0.77229	1.99377	0.873214	0.892279	2.25887	0.908955	0.976189	2.41317
YDL033C	NA	NA	NA	NA	NA	NA	1.57714	2.05104	2.48844
YDL035C	NA	2.03632	0.758694	0.807975	1.98399	1.40977	1.1065	2.5899	1.93964
YDL036C	NA	NA	NA	NA	NA	2.30202	NA	NA	NA
YDL037C	NA	1.17172	1.40305	NA	NA	NA	2.17708	1.63785	2.50189
YDL040C	NA	NA	NA	0.657508	NA	0.820869	NA	NA	1.00206
YDL042C	NA	NA	NA	NA	NA	1.6819	NA	1.77239	1.7676
YDL043C	NA	NA	NA	NA	NA	NA	NA	NA	1.65165
YDL044C	NA	NA	NA	NA	NA	NA	2.19579	2.11147	2.53788
YDL045C	NA	NA	NA	NA	NA	1.6087	NA	1.61588	NA
YDL045W-A	1.88706	NA	2.7439	2.47519	1.95735	3.04269	2.58993	2.02922	3.25118
YDL046W	NA	1.47087	2.17926	NA	1.01206	1.25008	NA	1.2594	1.60651
YDL047W	NA	NA	1.79894	1.04191	NA	2.23327	NA	NA	2.15823
YDL048C	NA	NA	NA	NA	NA	NA	NA	3.09615	2.61681
YDL049C	NA	NA	NA	NA	1.95329	NA	2.63772	NA	NA
YDL051W	NA	NA	NA	NA	0.761479	1.14265	NA	NA	NA
YDL052C	NA	NA	NA	NA	NA	NA	NA	NA	1.07721
YDL053C	NA	1.24984	NA	2.0721	NA	1.82154	2.52906	1.59252	2.35787
YDL054C	NA	NA	NA	NA	NA	NA	NA	NA	NA
YDL055C	NA	0.293807	1.9542	0.602819	0.33756	1.30701	NA	NA	1.53072
YDL056W	NA	NA	1.35072	1.50217	0.967654	1.95996	1.69068	1.51061	2.15075
YDL057W	NA	NA	NA	NA	NA	NA	NA	NA	NA
YDL058W	NA	1.0374	0.731638	0.776119	1.0168	0.920623	0.831494	1.43436	1.6528
YDL059C	NA	NA	NA	NA	NA	NA	NA	NA	NA
YDL060W	NA	NA	1.45305	0.882795	0.929589	1.66758	NA	1.0788	1.22625
YDL061C	NA	1.56108	2.28279	NA	NA	1.35264	NA	1.69615	1.56257
YDL063C	NA	1.47635	NA	NA	2.0013	0.995543	NA	1.64143	NA
YDL064W	NA	NA	NA	NA	NA	NA	NA	NA	NA
YDL065C	NA	NA	NA	1.45744	1.57664	1.3592	1.63608	NA	NA
YDL066W	NA	NA	NA	NA	NA	NA	NA	0.753489	0.907503
YDL067C	1.69039	1.18038	1.84354	1.9255	1.39846	1.83094	1.74249	1.37736	2.31713
YDL069C	NA	NA	NA	2.82574	NA	NA	2.17878	NA	NA
YDL070W	2.92938	3.18957	5.10847	1.01503	NA	1.85439	1.75688	1.41452	2.81599
YDL072C	NA	NA	NA	NA	NA	NA	NA	1.40279	1.35981
YDL073W	1.02234	1.3844	2.24285	NA	0.983447	2.07455	1.16056	1.10055	2.05391
YDL074C	NA	1.77399	2.63584	1.12264	1.91129	1.43602	1.25161	1.89117	2.21085
YDL075W	NA	0.632367	NA	NA	0.809648	2.29768	NA	NA	NA
YDL076C	1.70518	NA	1.79639	NA	NA	1.91465	2.12952	NA	1.4836
YDL077C	NA	NA	NA	NA	NA	1.8093	NA	NA	1.61404
YDL078C	NA	NA	NA	NA	NA	NA	NA	NA	NA
YDL080C	NA	NA	NA	NA	NA	NA	1.13071	1.11263	2.14555
YDL081C	NA	NA	0.994782	0.476834	0.676481	1.00187	NA	0.392028	0.990136
YDL082W	NA	NA	NA	NA	NA	NA	NA	NA	NA
YDL083C	NA	NA	NA	NA	NA	NA	NA	NA	NA
YDL084W	NA	NA	0.584463	0.489445	0.440972	0.970077	NA	NA	0.549956
YDL086W	NA	NA	NA	NA	1.33666	1.56475	NA	NA	1.78898
YDL087C	NA	NA	NA	NA	NA	NA	NA	NA	NA
YDL088C	NA	NA	1.28519	1.49433	1.54289	1.43063	2.10799	1.54835	1.73866
YDL089W	NA	NA	2.11111	NA	NA	1.84387	NA	NA	NA
YDL090C	NA	NA	NA	NA	1.91321	NA	NA	1.84038	1.38573
YDL092W	NA	NA	2.65851	1.33347	NA	3.46225	1.33445	NA	2.64898
YDL093W	NA	NA	NA	NA	NA	1.02871	NA	NA	1.03372
YDL095W	NA	NA	NA	NA	NA	NA	NA	NA	NA
YDL097C	NA	NA	1.29194	0.872914	NA	1.45029	1.10207	NA	1.81775
YDL098C	NA	NA	NA	NA	NA	NA	2.36755	2.82356	NA
YDL099W	NA	NA	NA	1.75617	NA	1.60292	NA	NA	1.75756
YDL100C	NA	NA	NA	NA	0.680611	0.834628	NA	NA	0.790692
YDL101C	NA	NA	NA	NA	NA	2.06552	NA	1.43471	2.62712
YDL102W	NA	NA	NA	NA	1.27358	NA	NA	1.77189	0.913096
YDL103C	NA	NA	1.11607	NA	NA	1.18898	NA	NA	1.11488
YDL104C	NA	NA	NA	NA	NA	2.96483	NA	NA	3.53131
YDL105W	NA	NA	NA	NA	2.77807	NA	NA	2.78305	2.24744
YDL106C	NA	NA	NA	1.6978	NA	1.82204	1.43317	1.47711	1.53706
YDL107W	NA	NA	NA	NA	NA	2.70088	NA	2.69281	3.04834
YDL108W	NA	NA	2.31629	1.74647	NA	1.72212	NA	1.31275	NA
YDL109C	NA	NA	NA	NA	2.6374	NA	NA	NA	1.58228
YDL110C	NA	NA	NA	NA	NA	NA	2.05941	2.04306	2.22449
YDL111C	NA	NA	NA	1.64905	1.61081	1.78922	NA	1.60856	NA
YDL112W	NA	NA	0.615848	0.981832	0.608746	0.991089	0.936876	NA	0.905859
YDL113C	NA	NA	NA	NA	NA	2.81668	1.69064	2.55628	2.83879
YDL115C	NA	1.54576	NA	1.38942	NA	NA	1.89164	2.14699	1.20683
YDL116W	NA	NA	0.96234	1.62361	NA	1.4944	1.67663	0.750805	1.72078
YDL117W	NA	NA	1.08102	1.36672	1.04186	1.38299	2.13496	1.81664	1.71739
YDL119C	NA	NA	NA	2.09418	NA	NA	NA	NA	2.56552
YDL120W	NA	2.80591	1.58344	NA	2.23618	1.59786	1.64545	2.04109	NA
YDL121C	NA	NA	NA	NA	NA	NA	NA	NA	NA
YDL122W	NA	NA	1.29077	1.04052	NA	1.58929	0.837504	NA	1.75883
YDL123W	NA	NA	NA	NA	1.22967	NA	1.27814	1.59438	NA
YDL124W	NA	NA	NA	NA	NA	1.21305	1.18775	1.27462	1.43045
YDL125C	NA	NA	NA	NA	NA	1.77097	NA	NA	NA
YDL126C	-0.302567	NA	NA	NA	0.41251	0.466741	NA	0.374903	0.629854
YDL127W	NA	NA	NA	NA	NA	NA	1.18449	2.30832	2.26805
YDL128W	NA	NA	NA	NA	NA	NA	0.919823	NA	0.720085
YDL129W	1.75869	1.75164	2.25683	NA	NA	2.17643	1.67793	NA	2.25984
YDL130W	NA	NA	1.13185	1.08412	0.591528	1.44027	NA	NA	1.294
YDL131W	NA	NA	NA	NA	NA	NA	NA	NA	0.753933
YDL132W	NA	NA	0.936406	1.0923	1.05678	1.27893	1.08684	1.69232	1.14382
YDL133C-A	NA	0.92088	1.08361	0.697953	1.06635	NA	0.8138	1.27689	1.72363
YDL133W	NA	NA	NA	1.46425	1.81983	NA	2.16359	2.54036	1.96616
YDL135C	NA	NA	NA	NA	NA	1.57257	NA	0.989558	NA
YDL136W	NA	NA	NA	NA	NA	NA	NA	NA	NA
YDL137W	NA	NA	1.36445	NA	NA	1.21512	NA	1.0337	1.71429
YDL138W	NA	NA	NA	NA	NA	1.77253	1.65236	1.98581	1.62898
YDL141W	1.082	NA	2.26662	NA	NA	1.27957	NA	NA	1.22241
YDL142C	NA	NA	NA	NA	NA	2.25515	NA	NA	2.26798
YDL143W	NA	NA	0.469	0.68493	0.680801	0.733312	NA	NA	NA
YDL144C	NA	NA	NA	NA	NA	NA	NA	NA	NA
YDL145C	NA	NA	0.764977	0.45758	0.725024	1.10772	0.408955	0.76798	1.00868
YDL147W	NA	NA	0.775651	NA	0.982452	1.60367	0.77729	1.18898	1.42413
YDL148C	0.89975	NA	1.82215	1.09761	NA	2.18586	1.09993	NA	1.40179
YDL149W	NA	NA	NA	NA	NA	NA	2.31004	2.32463	2.26236
YDL150W	NA	NA	NA	NA	NA	2.05157	NA	NA	NA
YDL153C	1.3173	NA	1.20038	1.86674	0.826285	1.35138	1.69414	0.822426	NA
YDL155W	NA	NA	1.51556	1.63881	NA	1.87005	1.51633	1.45737	2.74878
YDL156W	NA	NA	NA	NA	NA	NA	NA	NA	NA
YDL157C	NA	2.71859	2.45847	NA	NA	2.11334	NA	NA	NA
YDL159W	1.35333	2.61977	2.79266	NA	NA	1.42273	1.35085	2.2078	1.97593
YDL160C	0.986948	0.940531	2.93144	0.462558	NA	NA	1.46235	NA	1.31774
YDL161W	NA	1.33567	1.4469	NA	1.20852	2.06674	NA	1.46931	1.7588
YDL164C	NA	NA	NA	NA	NA	NA	NA	1.02432	NA
YDL165W	NA	NA	NA	NA	NA	NA	NA	NA	NA
YDL166C	NA	NA	NA	NA	NA	NA	NA	1.4472	1.94442
YDL167C	NA	1.43831	1.83943	0.769486	1.35474	1.45467	1.00284	0.836683	1.0482
YDL168W	NA	NA	NA	NA	NA	NA	NA	NA	NA
YDL170W	NA	NA	NA	2.16545	NA	NA	2.08584	1.69884	3.04569
YDL171C	NA	NA	0.765024	NA	NA	0.501369	NA	NA	0.482085
YDL173W	NA	NA	NA	NA	1.70125	1.4589	NA	1.5852	1.79749
YDL174C	NA	NA	1.25334	NA	1.25762	1.08137	1.37831	1.81781	1.94702
YDL175C	NA	NA	NA	NA	2.04835	2.54988	1.17092	NA	2.70781
YDL176W	NA	NA	1.88759	1.81677	NA	2.60875	2.23883	2.09757	2.98206
YDL177C	NA	2.66428	2.66504	NA	NA	2.98515	NA	2.85981	3.22369
YDL178W	NA	NA	NA	NA	NA	NA	NA	NA	1.26437
YDL179W	NA	2.04858	2.64815	NA	NA	2.19445	NA	NA	2.54001
YDL180W	NA	2.26769	NA	NA	2.04817	NA	NA	2.14697	1.58482
YDL181W	NA	NA	NA	NA	NA	NA	NA	NA	NA
YDL183C	NA	NA	NA	NA	2.70942	NA	4.28953	2.87035	NA
YDL184C	0.678077	1.1223	0.968048	0.713926	1.23641	1.10785	0.996914	1.73726	1.42172
YDL185W	-0.319274	NA	NA	NA	NA	0.511734	NA	NA	0.413468
YDL188C	NA	NA	NA	1.11815	NA	1.04823	1.02834	0.669426	NA
YDL189W	NA	1.47642	NA	1.38333	2.43413	1.86441	1.50276	1.83029	1.81848
YDL190C	NA	NA	NA	NA	0.798928	NA	0.933588	1.06506	0.769047
YDL191W	NA	NA	NA	NA	NA	NA	NA	NA	NA
YDL192W	NA	0.420785	2.14818	NA	0.958555	2.28441	NA	0.381374	4.15437
YDL193W	NA	NA	NA	NA	NA	NA	NA	NA	NA
YDL195W	0.51948	NA	NA	0.856002	NA	0.525689	0.542575	NA	NA
YDL197C	NA	1.48789	NA	NA	1.82303	2.17837	1.61281	2.83058	2.79358
YDL198C	NA	NA	2.09191	NA	NA	1.26203	NA	NA	1.69826
YDL199C	NA	NA	NA	NA	NA	NA	NA	NA	2.30102
YDL201W	NA	1.11018	3.52704	NA	1.13101	2.77458	NA	NA	2.54602
YDL202W	NA	NA	2.42338	NA	NA	2.83743	NA	1.75369	2.85545
YDL203C	NA	1.23883	1.4318	1.81502	NA	1.22764	1.69073	1.5862	1.58165
YDL204W	NA	NA	2.34804	NA	NA	NA	NA	2.14504	2.56428
YDL205C	NA	NA	1.14069	NA	NA	0.871656	NA	NA	1.13388
YDL206W	NA	NA	2.72523	NA	NA	2.93919	NA	2.95634	3.10252
YDL207W	NA	NA	NA	2.02931	1.96195	1.01999	2.09941	2.13531	1.03101
YDL208W	1.39579	1.00332	1.63306	1.52362	1.17222	NA	0.993216	NA	NA
YDL209C	NA	NA	2.27383	NA	1.55503	2.16967	NA	2.02042	2.89613
YDL211C	NA	NA	2.12565	NA	2.02035	2.03237	NA	2.47429	2.33889
YDL212W	NA	-0.758017	NA	NA	NA	NA	NA	NA	NA
YDL213C	NA	NA	NA	1.79654	1.84512	1.78296	NA	NA	2.7565
YDL215C	NA	NA	NA	NA	NA	NA	3.01136	3.2929	2.47446
YDL216C	2.28642	NA	NA	NA	NA	NA	1.92497	NA	NA
YDL217C	NA	NA	1.78504	1.70591	1.44469	2.07795	1.57465	NA	2.56785
YDL219W	NA	NA	NA	NA	NA	NA	NA	2.79967	NA
YDL220C	NA	NA	NA	NA	NA	NA	NA	1.90749	1.60268
YDL224C	NA	1.39449	1.11838	1.14637	1.58435	1.94265	1.85423	1.95743	2.10103
YDL225W	NA	NA	1.92335	NA	NA	1.67102	NA	1.22508	1.94301
YDL226C	NA	NA	1.05377	NA	NA	NA	NA	NA	1.13533
YDL227C	1.37995	2.51454	3.72558	1.10893	NA	1.62215	1.01106	1.09619	1.89168
YDL230W	NA	NA	NA	2.69368	NA	NA	2.49252	NA	2.34478
YDL231C	NA	NA	2.90657	NA	NA	2.92807	NA	1.18426	2.77434
YDL232W	1.93263	2.4416	2.46227	2.52123	2.40766	2.30672	1.74498	2.54614	2.17868
YDL233W	NA	NA	NA	NA	1.90278	1.69441	1.46509	2.08048	2.09482
YDL234C	NA	NA	NA	1.87531	2.00804	NA	1.94606	3.28645	1.93017
YDL235C	NA	1.37492	NA	NA	1.67532	1.41411	NA	1.60176	1.24399
YDL236W	NA	NA	1.66055	NA	NA	1.0624	NA	NA	1.5552
YDL237W	NA	NA	NA	NA	NA	NA	NA	NA	1.28213
YDL238C	NA	NA	NA	NA	NA	2.31663	NA	1.76438	3.82134
YDL240W	3.30172	4.60778	4.69173	1.81034	2.08961	1.96657	1.88423	2.68533	2.38184
YDL241W	1.13059	NA	NA	-0.305	1.77045	NA	1.61413	1.83535	NA
YDLCdelta1	NA	NA	NA	NA	NA	NA	NA	NA	NA
YDLWtau1	NA	NA	NA	NA	NA	NA	NA	NA	NA
YDR001C	NA	NA	NA	NA	NA	NA	2.08415	1.22044	1.59921
YDR002W	NA	NA	NA	0.645345	0.547662	0.848829	NA	NA	1.39258
YDR003W	NA	1.55461	2.83194	NA	NA	2.37685	NA	1.79706	3.33062
YDR004W	NA	1.68219	3.16804	NA	NA	2.77698	NA	1.5305	2.54473
YDR005C	NA	NA	NA	NA	NA	NA	NA	NA	NA
YDR006C	NA	NA	1.15068	1.5885	1.5451	1.30739	2.57223	2.21005	2.31541
YDR007W	NA	NA	1.71719	NA	NA	1.98718	1.98134	1.44364	2.50589
YDR011W	NA	NA	NA	0.735995	0.537771	0.592032	1.26877	1.27594	1.21329
YDR013W	NA	NA	NA	NA	2.25881	NA	NA	NA	2.05065
YDR014W	NA	NA	2.39435	NA	NA	2.76595	2.48408	NA	2.85846
YDR016C	2.61621	2.49216	4.77291	NA	NA	NA	NA	2.09318	NA
YDR017C	NA	NA	1.38132	0.977372	0.951195	1.67317	1.55478	1.54234	2.21988
YDR020C	NA	1.93481	NA	NA	2.45106	NA	NA	1.98844	2.02813
YDR021W	NA	NA	NA	NA	NA	NA	NA	NA	NA
YDR022C	NA	NA	NA	NA	NA	NA	NA	2.53318	NA
YDR023W	NA	NA	0.866238	0.332198	NA	0.652721	NA	-0.564355	NA
YDR025W	NA	0.780751	NA	NA	0.957258	2.54494	NA	NA	NA
YDR026C	NA	1.64835	NA	1.73877	1.8784	1.78862	2.02662	1.9709	1.90654
YDR027C	NA	NA	1.72069	1.70395	NA	1.7154	1.68849	NA	1.82023
YDR028C	NA	NA	0.873626	1.04823	1.10014	1.27105	1.29753	1.21828	1.95873
YDR030C	NA	NA	NA	NA	NA	NA	2.19615	NA	2.61893
YDR031W	NA	NA	NA	NA	NA	NA	NA	2.53364	NA
YDR032C	NA	NA	NA	NA	NA	1.23661	0.957067	NA	1.64119
YDR033W	NA	0.554476	2.76245	0.47653	0.0135618	1.00754	0.928486	0.636417	2.25141
YDR034C	1.50618	1.76621	2.74968	1.02107	1.09733	1.7132	1.48328	1.71817	2.19237
YDR034C-C	NA	NA	NA	NA	NA	NA	NA	NA	NA
YDR034C-D	NA	NA	NA	NA	NA	1.65449	NA	NA	1.70081
YDR035W	NA	0.872776	2.77672	NA	NA	1.28933	NA	NA	1.30583
YDR036C	NA	NA	1.20242	NA	NA	NA	1.2135	NA	NA
YDR037W	NA	NA	0.731873	0.432386	NA	NA	NA	-0.376157	NA
YDR041W	NA	1.54725	2.03308	1.97745	1.49225	NA	2.5101	2.37843	2.44852
YDR042C	NA	NA	NA	NA	NA	NA	1.43135	NA	NA
YDR043C	NA	NA	NA	NA	NA	NA	NA	2.79541	NA
YDR044W	NA	NA	NA	NA	NA	NA	1.19159	NA	NA
YDR045C	NA	NA	NA	2.05435	1.58595	NA	NA	NA	2.42976
YDR046C	0.890258	NA	NA	1.16674	NA	1.12601	1.24674	0.772892	1.66658
YDR047W	NA	1.39805	NA	1.22192	1.36409	NA	1.6208	1.62694	1.25715
YDR049W	NA	NA	1.67564	NA	NA	2.21787	2.00806	1.61127	2.24726
YDR050C	-0.537478	-0.297039	0.318392	NA	NA	0.391389	-0.545055	-0.326536	NA
YDR051C	NA	NA	1.34858	NA	1.79156	2.02068	NA	NA	1.71106
YDR052C	NA	NA	2.11636	1.65618	1.50869	2.09891	1.58994	1.83296	2.60556
YDR054C	NA	NA	1.51558	1.1631	1.61532	1.81716	NA	1.84996	1.73539
YDR055W	NA	NA	0.952501	1.23843	NA	1.26056	1.42062	0.718014	1.34893
YDR056C	NA	NA	NA	1.62323	NA	NA	1.13343	NA	NA
YDR057W	NA	NA	NA	NA	NA	NA	NA	NA	NA
YDR058C	NA	NA	NA	NA	NA	NA	NA	NA	NA
YDR059C	NA	NA	NA	NA	NA	NA	NA	NA	NA
YDR060W	NA	0.644395	1.20174	NA	NA	1.28856	0.782073	NA	1.32797
YDR061W	NA	NA	NA	1.44709	NA	1.3362	1.8136	1.66877	1.93877
YDR062W	NA	NA	0.612447	NA	NA	1.29754	NA	NA	0.742861
YDR063W	NA	NA	NA	NA	1.44052	1.274	NA	NA	1.52207
YDR064W	0.78807	NA	1.2326	0.827548	NA	NA	NA	NA	NA
YDR065W	NA	NA	NA	NA	NA	NA	NA	NA	2.45982
YDR067C	NA	NA	NA	NA	NA	NA	NA	3.23158	NA
YDR068W	NA	NA	NA	1.3469	1.76095	2.1535	NA	NA	1.88704
YDR069C	NA	NA	NA	NA	NA	1.45851	NA	NA	1.92276
YDR070C	NA	NA	NA	NA	NA	NA	NA	NA	2.97116
YDR071C	NA	NA	NA	NA	1.39423	1.20303	NA	NA	1.70785
YDR072C	NA	NA	1.51683	1.32036	0.91229	1.76607	2.07397	1.53876	2.80086
YDR073W	NA	2.47146	2.25845	NA	3.11889	NA	1.63161	3.72166	NA
YDR074W	NA	-0.667782	0.818591	NA	NA	0.762869	1.62546	0.80058	1.81215
YDR075W	2.33035	1.68165	2.46538	NA	NA	NA	NA	2.51375	1.42113
YDR076W	NA	NA	NA	NA	1.87573	NA	NA	2.20213	NA
YDR077W	NA	0.521337	1.66343	0.583073	0.975184	1.63475	0.429479	0.72014	1.86389
YDR078C	NA	NA	NA	2.24268	NA	NA	2.8112	NA	NA
YDR079W	NA	NA	NA	NA	NA	NA	NA	NA	NA
YDR080W	NA	NA	NA	NA	NA	2.04265	1.44044	NA	2.2195
YDR081C	NA	NA	NA	1.0505	NA	1.1212	0.981127	1.38323	1.71216
YDR082W	NA	NA	NA	NA	NA	NA	NA	1.23378	2.46443
YDR083W	NA	1.69007	NA	NA	NA	NA	1.80927	NA	NA
YDR084C	NA	NA	NA	NA	NA	NA	NA	NA	NA
YDR085C	NA	NA	NA	NA	2.73686	NA	NA	3.17217	NA
YDR086C	0.815065	0.861485	2.15677	0.8181	1.14278	1.53235	0.864261	NA	2.184
YDR087C	NA	1.7206	1.00201	1.27465	1.56442	1.17841	NA	NA	NA
YDR088C	NA	NA	NA	NA	NA	2.23046	0.89864	1.86842	2.31101
YDR089W	NA	NA	NA	1.65052	1.67753	NA	1.97641	2.1193	1.26208
YDR090C	NA	1.82007	NA	NA	NA	1.79536	2.3881	2.16943	2.20119
YDR091C	NA	0.727832	1.5886	0.966928	0.872965	1.5461	NA	NA	0.686486
YDR092W	NA	NA	NA	NA	NA	NA	NA	NA	NA
YDR093W	NA	NA	NA	1.05194	0.458133	0.624169	1.05819	NA	0.620838
YDR097C	NA	0.931444	NA	1.08182	0.983051	0.890922	1.40473	1.02292	0.950018
YDR098C	NA	NA	NA	NA	NA	NA	NA	NA	NA
YDR098C-A	NA	NA	NA	NA	NA	NA	NA	NA	1.39313
YDR098C-B	NA	NA	NA	NA	NA	NA	NA	NA	NA
YDR099W	NA	NA	1.56087	0.989214	0.608222	1.81818	NA	NA	1.66607
YDR100W	NA	1.92613	NA	NA	NA	NA	NA	NA	NA
YDR101C	NA	NA	1.59293	1.02005	NA	1.65358	NA	NA	0.980775
YDR103W	NA	NA	NA	NA	NA	0.8246	1.6115	1.13819	1.31333
YDR104C	NA	NA	NA	NA	2.2189	1.06971	2.53559	3.23774	1.95272
YDR105C	NA	NA	NA	NA	1.65552	1.45809	1.17081	1.83382	1.49019
YDR107C	NA	NA	NA	NA	NA	NA	NA	NA	1.38251
YDR108W	NA	NA	NA	NA	1.56837	1.48035	2.57925	1.7077	1.42895
YDR109C	NA	NA	NA	NA	NA	1.60265	NA	NA	2.45726
YDR110W	NA	1.60506	3.14904	1.2212	NA	2.16309	1.83677	NA	2.51711
YDR111C	NA	NA	NA	NA	NA	NA	NA	NA	NA
YDR113C	NA	NA	NA	2.34827	2.92964	NA	2.27436	3.34278	1.92211
YDR115W	NA	NA	4.97312	1.73546	1.56158	NA	1.60268	1.6669	NA
YDR116C	NA	NA	NA	2.70619	NA	1.71207	2.7795	NA	1.90725
YDR117C	NA	NA	NA	NA	NA	1.72632	NA	1.78927	1.63651
YDR118W	NA	NA	NA	NA	NA	NA	NA	NA	2.20968
YDR119W	NA	NA	NA	1.72806	NA	0.867538	1.36959	NA	0.788107
YDR120C	1.20443	NA	2.13557	1.11495	NA	1.43414	1.62633	NA	1.04198
YDR121W	NA	NA	NA	NA	2.28408	2.08077	NA	NA	NA
YDR122W	NA	1.16496	1.03418	0.895014	1.81229	1.67181	1.58814	2.21759	2.34574
YDR123C	NA	1.46421	2.91894	1.8324	1.74677	3.71534	NA	1.76759	4.39611
YDR125C	NA	NA	NA	NA	NA	NA	NA	NA	2.6506
YDR126W	NA	NA	NA	NA	NA	NA	NA	NA	2.33036
YDR127W	-0.53965	NA	0.579917	NA	0.448559	0.671366	0.341976	0.880643	1.52754
YDR128W	NA	NA	NA	NA	NA	1.87194	1.75483	1.47116	2.18253
YDR129C	NA	NA	NA	NA	NA	NA	NA	NA	NA
YDR130C	NA	NA	NA	NA	NA	1.94517	1.39325	2.27844	2.26448
YDR131C	NA	NA	NA	NA	NA	NA	NA	NA	NA
YDR132C	NA	NA	NA	2.58014	NA	NA	NA	NA	NA
YDR134C	1.22644	1.91128	1.58309	1.24926	1.47769	0.816342	1.0633	1.68964	0.914952
YDR135C	NA	-0.47848	NA	NA	NA	0.785854	0.586734	0.877032	0.75609
YDR137W	NA	NA	NA	1.19971	NA	NA	1.62038	1.29106	1.40815
YDR138W	-1.44164	NA	1.22316	NA	1.53418	1.69635	1.01225	1.38707	1.9726
YDR139C	NA	NA	NA	NA	NA	NA	NA	NA	NA
YDR140W	NA	NA	NA	NA	1.49495	NA	NA	1.56925	NA
YDR141C	NA	NA	NA	1.17553	NA	0.939811	1.23395	1.14991	1.04292
YDR142C	NA	NA	NA	NA	NA	2.0868	NA	2.3121	2.96377
YDR143C	NA	1.53482	1.79426	NA	1.36764	1.98636	NA	1.37458	1.72015
YDR144C	NA	NA	0.837967	NA	NA	1.00973	NA	NA	NA
YDR145W	1.57287	0.981758	1.36384	2.21085	1.23036	1.59178	2.22888	1.12669	1.42333
YDR146C	NA	NA	NA	1.4921	NA	1.46758	1.59279	NA	2.07152
YDR147W	NA	NA	NA	NA	1.5837	2.43651	1.61803	1.68799	2.70902
YDR148C	NA	NA	NA	NA	NA	NA	NA	NA	NA
YDR150W	NA	NA	NA	1.66021	1.58683	1.41416	1.70591	2.49863	1.76158
YDR151C	NA	NA	NA	NA	NA	1.74145	NA	1.66162	1.67248
YDR152W	NA	1.54728	1.23312	1.57039	1.52278	1.33518	1.64137	1.44421	1.40019
YDR153C	NA	NA	1.8525	1.37781	NA	1.68288	1.32966	1.48085	1.55862
YDR155C	NA	NA	1.02442	NA	NA	0.61095	NA	NA	0.620022
YDR156W	NA	NA	1.48764	NA	1.35267	1.84312	NA	NA	1.32785
YDR158W	NA	NA	0.785015	NA	NA	0.75811	-0.59292	-0.445569	0.429164
YDR159W	NA	NA	1.38302	1.35318	NA	1.31409	1.71696	1.32526	1.60604
YDR160W	NA	NA	1.1004	NA	NA	NA	1.23655	1.49694	NA
YDR161W	NA	NA	NA	NA	NA	NA	NA	NA	NA
YDR162C	NA	NA	NA	NA	NA	NA	NA	NA	NA
YDR163W	NA	NA	NA	3.10771	NA	NA	NA	NA	NA
YDR164C	NA	NA	1.78085	NA	NA	2.2809	NA	1.46763	2.25014
YDR165W	NA	0.990757	NA	1.01613	0.997481	1.30197	NA	NA	0.958855
YDR166C	NA	NA	1.71343	1.82715	1.03133	1.82949	1.59638	1.00914	2.0005
YDR167W	NA	NA	NA	2.30809	2.03156	1.76487	2.11388	NA	NA
YDR168W	NA	NA	1.13582	NA	NA	NA	NA	NA	1.15931
YDR169C	NA	NA	1.36869	NA	NA	NA	1.03876	1.28593	1.89104
YDR170C	NA	1.63809	NA	1.4412	1.84451	1.33461	NA	2.36058	1.33016
YDR170W-A	NA	NA	NA	NA	NA	1.32249	NA	NA	2.14682
YDR171W	NA	NA	NA	NA	NA	1.99171	1.75221	1.24486	2.40576
YDR172W	NA	NA	1.08862	0.996211	NA	1.21336	0.559379	NA	0.883216
YDR173C	NA	NA	NA	NA	NA	NA	NA	NA	NA
YDR174W	1.46323	1.55198	3.69401	NA	NA	1.562	NA	NA	1.56181
YDR175C	NA	NA	NA	NA	NA	2.81389	2.00959	NA	3.37534
YDR176W	NA	NA	NA	1.34251	1.48128	1.81562	1.6831	1.78929	2.3995
YDR177W	NA	NA	NA	NA	NA	NA	NA	NA	1.60936
YDR178W	NA	NA	NA	NA	NA	NA	NA	NA	1.22621
YDR179C	NA	NA	NA	2.51591	NA	NA	2.71242	NA	NA
YDR179W-A	NA	NA	2.31629	NA	NA	NA	NA	NA	NA
YDR180W	NA	NA	NA	0.91086	1.28793	0.906674	1.36148	0.946914	0.94797
YDR181C	NA	NA	NA	NA	NA	NA	1.89914	NA	NA
YDR182W	NA	NA	NA	NA	NA	1.0598	1.62288	NA	1.10708
YDR183W	NA	NA	NA	NA	NA	3.47393	NA	NA	NA
YDR184C	NA	2.01801	NA	NA	2.39397	NA	NA	NA	NA
YDR185C	NA	NA	NA	NA	NA	NA	NA	NA	NA
YDR186C	NA	1.65341	0.894796	NA	1.62637	1.37832	0.96158	2.21501	2.09067
YDR188W	NA	0.55091	1.454	NA	0.631006	0.923659	NA	0.938631	1.31753
YDR189W	NA	NA	1.13495	NA	0.841539	1.07363	NA	NA	1.51004
YDR190C	NA	0.807806	1.4351	NA	0.919199	1.08293	NA	0.91762	NA
YDR191W	NA	NA	NA	NA	NA	NA	3.26867	NA	2.14261
YDR192C	NA	NA	NA	NA	NA	NA	1.69803	NA	1.86971
YDR194C	0.932008	1.01225	1.61407	1.12347	1.58592	1.67547	1.55646	1.71114	2.25639
YDR195W	NA	NA	1.81793	NA	2.19187	NA	1.85791	2.57324	1.67402
YDR196C	NA	NA	NA	NA	2.13529	NA	NA	1.71452	NA
YDR197W	NA	NA	NA	NA	NA	1.53896	1.77904	1.73893	2.01218
YDR198C	NA	NA	NA	NA	NA	NA	NA	NA	NA
YDR200C	1.90517	2.41573	1.88179	1.95469	2.75413	2.72417	1.97126	2.68991	2.85127
YDR201W	1.90734	2.33239	1.93955	NA	1.80698	NA	NA	NA	NA
YDR202C	NA	NA	NA	NA	NA	NA	1.64261	NA	1.48458
YDR204W	NA	NA	NA	NA	NA	NA	NA	NA	1.39668
YDR205W	NA	1.63468	NA	NA	1.86911	NA	1.66253	1.91178	1.35774
YDR206W	NA	NA	1.34673	NA	NA	1.2526	1.44862	1.87133	1.63751
YDR207C	NA	NA	1.70232	NA	1.56529	1.38627	1.49437	1.37227	1.55089
YDR208W	NA	NA	1.05396	1.02001	1.35944	1.17179	1.57968	2.44002	1.79442
YDR210C-C	NA	NA	NA	NA	NA	NA	NA	NA	1.20672
YDR210C-D	NA	NA	NA	NA	NA	NA	NA	NA	NA
YDR210W	NA	1.44441	1.68699	1.42067	1.57916	1.64817	1.56901	1.69392	1.44413
YDR210W-A	NA	NA	NA	NA	NA	NA	NA	NA	NA
YDR210W-B	NA	NA	NA	NA	1.26198	NA	1.20227	1.23258	1.87506
YDR211W	NA	NA	0.494257	0.970695	0.76615	1.18717	NA	1.10763	1.12157
YDR212W	NA	NA	NA	0.711208	NA	0.901861	NA	NA	NA
YDR213W	NA	1.09113	1.78734	1.23241	1.08082	1.20994	1.62461	1.20912	1.464
YDR214W	NA	NA	NA	NA	NA	NA	NA	NA	NA
YDR217C	1.233	NA	NA	1.28585	1.26573	1.2158	1.79716	1.81929	2.16428
YDR219C	NA	NA	1.61001	1.67519	1.74461	2.04434	1.90659	2.6451	2.56052
YDR221W	NA	NA	NA	NA	NA	1.23376	1.22749	0.897811	1.56999
YDR222W	NA	2.19071	NA	NA	NA	2.16822	1.81467	NA	2.07582
YDR224C	1.75216	2.14325	3.43148	1.41613	1.35326	2.34438	1.73988	1.32366	2.40729
YDR225W	1.49463	2.25905	3.60682	1.07997	1.31627	1.60182	1.33062	1.36288	2.11224
YDR226W	NA	NA	1.387	NA	0.422467	1.03062	NA	NA	0.735924
YDR227W	NA	1.02726	1.12689	1.41057	1.51014	1.0969	2.09432	2.00425	1.85359
YDR228C	NA	NA	1.16165	1.25027	1.62488	1.51819	NA	1.83659	1.85385
YDR229W	NA	NA	NA	1.93368	NA	NA	2.33975	NA	1.39091
YDR231C	NA	NA	NA	NA	NA	NA	NA	NA	NA
YDR232W	0.910629	0.756925	1.55242	NA	NA	0.956219	0.720388	0.773827	1.04583
YDR233C	NA	NA	0.827684	NA	NA	1.00362	-0.416711	-0.640656	0.672001
YDR235W	NA	NA	NA	NA	NA	1.5997	NA	1.76091	1.62288
YDR236C	NA	NA	NA	NA	NA	NA	NA	1.35787	NA
YDR237W	NA	NA	NA	1.47807	NA	2.01138	1.72999	NA	2.39973
YDR238C	NA	NA	0.497302	0.49641	0.412422	0.856417	0.516282	0.460298	1.09296
YDR239C	NA	NA	NA	NA	NA	NA	NA	1.66517	2.05949
YDR240C	NA	NA	NA	1.455	NA	NA	1.54988	2.74027	NA
YDR242W	NA	NA	NA	NA	NA	NA	NA	2.0289	3.47792
YDR243C	NA	NA	NA	NA	NA	NA	1.70021	NA	1.5013
YDR244W	NA	NA	NA	1.69836	NA	1.60771	2.53977	NA	1.98896
YDR245W	NA	NA	NA	NA	1.27211	0.937759	NA	1.13403	1.01857
YDR246W	NA	NA	NA	2.187	NA	NA	2.10663	NA	NA
YDR247W	NA	1.68867	3.593	NA	1.36687	2.79559	NA	1.33965	3.22896
YDR248C	NA	NA	NA	NA	NA	NA	NA	NA	NA
YDR249C	NA	NA	NA	NA	NA	1.95692	2.2945	NA	2.52405
YDR251W	0.953449	1.11288	NA	1.33476	1.16178	0.950846	1.40795	1.51677	0.898769
YDR252W	NA	NA	NA	NA	NA	2.51796	NA	NA	3.19688
YDR253C	NA	NA	NA	NA	NA	NA	NA	NA	NA
YDR254W	NA	NA	NA	NA	2.2262	2.21666	1.54791	2.18236	2.41731
YDR255C	2.05467	NA	NA	NA	NA	NA	2.78156	2.21332	1.44295
YDR256C	NA	NA	NA	NA	NA	NA	NA	NA	NA
YDR257C	NA	NA	1.56266	NA	NA	1.96145	1.33561	NA	2.16504
YDR258C	NA	NA	0.989665	NA	NA	1.27819	1.75806	1.03287	2.63861
YDR260C	NA	2.02189	NA	2.47769	1.79382	NA	NA	1.96195	NA
YDR261C	NA	NA	NA	NA	0.973867	NA	1.046	0.954591	NA
YDR261C-C	NA	NA	NA	NA	NA	NA	NA	NA	NA
YDR261C-D	NA	NA	NA	NA	NA	NA	NA	NA	NA
YDR261W-A	NA	NA	NA	NA	NA	NA	NA	NA	NA
YDR261W-B	NA	NA	1.01842	1.44392	0.641489	1.35035	1.18373	1.05382	2.42139
YDR262W	NA	NA	2.62796	1.24709	NA	1.95566	2.14542	1.54385	2.90264
YDR263C	NA	NA	2.22384	1.91117	NA	NA	2.24763	1.4944	1.92265
YDR264C	NA	NA	0.953827	NA	NA	1.18011	1.12038	1.05403	2.0896
YDR265W	NA	NA	NA	2.4518	NA	1.81724	2.81588	2.14113	2.7126
YDR266C	NA	NA	NA	0.913423	NA	NA	0.977522	NA	NA
YDR267C	NA	NA	1.79552	NA	NA	1.48163	1.51895	NA	1.43048
YDR268W	NA	NA	NA	NA	NA	NA	2.28229	2.45459	1.93509
YDR270W	NA	NA	1.28873	1.21962	1.25476	1.47738	2.67242	2.87065	3.32788
YDR272W	NA	NA	NA	NA	NA	NA	NA	NA	NA
YDR273W	NA	NA	NA	NA	NA	NA	NA	4.25664	NA
YDR276C	1.69656	1.91208	2.21627	1.30612	1.68186	1.31802	1.7092	1.6758	2.11601
YDR277C	NA	4.1328	3.47707	NA	NA	NA	NA	2.48852	2.26434
YDR279W	NA	1.68831	NA	NA	NA	NA	NA	NA	NA
YDR280W	NA	1.20111	2.1117	NA	NA	1.37994	NA	NA	1.29461
YDR281C	3.69312	3.12801	2.71933	3.14993	2.61558	1.75854	4.25943	2.6561	2.86
YDR282C	0.36284	NA	NA	NA	NA	NA	NA	NA	2.86034
YDR283C	NA	NA	NA	NA	NA	NA	NA	NA	NA
YDR284C	NA	NA	NA	1.3501	NA	NA	1.30057	NA	1.1313
YDR286C	NA	NA	NA	NA	NA	NA	2.44156	NA	NA
YDR287W	NA	NA	NA	NA	2.50613	NA	2.09905	NA	NA
YDR288W	NA	NA	NA	NA	2.6227	NA	1.91066	2.57381	2.18705
YDR289C	NA	NA	NA	NA	1.48211	2.04939	NA	NA	2.62879
YDR291W	NA	NA	NA	1.40891	NA	NA	1.69483	0.971829	1.74039
YDR292C	NA	NA	NA	0.886103	NA	NA	NA	1.07985	NA
YDR294C	NA	NA	NA	NA	NA	0.934615	NA	NA	NA
YDR295C	NA	1.81923	NA	2.09677	2.69132	NA	2.43423	2.71413	NA
YDR296W	NA	NA	NA	NA	1.56731	1.39725	NA	NA	1.86348
YDR297W	NA	1.00882	1.38698	NA	NA	2.28089	NA	NA	NA
YDR298C	NA	NA	1.78546	1.0411	NA	1.22247	NA	NA	1.38746
YDR299W	NA	2.54725	NA	NA	2.98854	3.11981	NA	2.83235	NA
YDR300C	NA	NA	NA	1.28224	NA	1.6171	NA	NA	NA
YDR301W	1.74466	1.70584	2.07841	1.3471	NA	0.633604	1.74411	1.24359	1.08708
YDR302W	NA	NA	NA	1.59933	2.5355	NA	NA	NA	NA
YDR303C	NA	1.53382	1.76052	1.07037	1.43861	0.989883	0.912532	1.90944	1.69385
YDR304C	NA	-0.87295	NA	NA	NA	0.777234	NA	-0.865056	NA
YDR305C	NA	NA	NA	NA	NA	NA	NA	NA	NA
YDR306C	NA	NA	NA	NA	NA	1.43641	2.44894	1.38393	1.3173
YDR307W	NA	NA	NA	NA	NA	NA	1.61183	NA	NA
YDR308C	NA	NA	NA	NA	NA	2.19267	NA	1.88013	2.65229
YDR309C	NA	1.27534	2.34661	1.50181	NA	2.93587	1.58454	1.50591	2.95823
YDR310C	NA	0.987346	0.739132	0.795711	1.24106	0.791668	1.09815	1.59112	0.736992
YDR311W	NA	1.40047	1.66921	2.24652	NA	2.11873	NA	1.44156	2.28551
YDR312W	NA	NA	NA	NA	NA	2.00296	NA	NA	1.5332
YDR313C	NA	NA	1.93037	NA	NA	1.81691	NA	1.61014	2.23555
YDR314C	NA	NA	NA	NA	NA	2.19906	2.262	NA	2.61178
YDR315C	NA	NA	2.83057	NA	NA	NA	NA	NA	3.53398
YDR316W	1.98282	NA	NA	NA	NA	NA	2.04354	2.57963	1.92787
YDR316W-A	NA	NA	NA	NA	NA	NA	NA	NA	NA
YDR316W-B	NA	NA	NA	NA	NA	NA	NA	NA	NA
YDR318W	NA	NA	NA	NA	NA	NA	2.2277	2.0059	NA
YDR319C	NA	NA	NA	NA	NA	NA	NA	NA	NA
YDR320C	NA	NA	NA	1.4577	NA	NA	1.64767	NA	NA
YDR321W	NA	NA	NA	NA	NA	0.717635	NA	NA	NA
YDR322W	NA	NA	NA	NA	NA	1.23091	2.09215	NA	NA
YDR323C	NA	NA	NA	NA	1.78288	NA	NA	NA	2.71688
YDR324C	NA	0.875357	1.84315	NA	0.886299	1.68231	NA	NA	1.72762
YDR325W	NA	1.68057	0.971619	1.21751	1.53574	1.09206	1.67321	2.00526	1.21648
YDR326C	NA	1.1652	0.943752	1.04402	1.11874	0.888759	1.71801	1.37222	1.30846
YDR328C	NA	NA	NA	0.879543	NA	NA	NA	NA	1.03491
YDR329C	NA	1.76797	NA	NA	1.90188	NA	1.87409	2.56437	NA
YDR330W	NA	NA	NA	NA	NA	1.72059	1.55082	NA	2.18242
YDR331W	NA	NA	1.25686	1.3178	NA	NA	1.21779	NA	1.74187
YDR332W	NA	2.24902	NA	NA	2.37729	NA	NA	2.6573	1.97809
YDR333C	NA	NA	NA	NA	NA	1.21876	1.68132	0.899698	2.09834
YDR334W	1.62588	2.03169	3.07477	NA	NA	0.849095	1.31321	1.09815	1.88452
YDR335W	NA	0.979632	0.866856	0.977772	0.742359	NA	1.53399	1.05571	1.56438
YDR336W	NA	NA	NA	NA	NA	NA	NA	NA	NA
YDR337W	NA	NA	2.44598	NA	NA	2.78743	1.53441	1.57758	3.99405
YDR338C	NA	NA	NA	NA	1.40595	1.47545	1.42231	1.95899	1.37566
YDR339C	NA	NA	NA	3.20563	1.74992	1.22404	2.98902	NA	NA
YDR341C	NA	NA	0.865673	NA	NA	0.824002	-0.5559	-0.605202	NA
YDR345C	NA	NA	0.803087	NA	NA	1.20026	0.665219	0.865091	1.92659
YDR346C	NA	1.17528	1.8848	NA	1.12434	1.3925	0.634173	1.06547	1.71101
YDR347W	NA	NA	NA	NA	NA	NA	1.39313	1.18573	1.33666
YDR348C	NA	NA	1.61022	1.27585	1.16239	1.84209	1.3171	1.28847	1.9045
YDR349C	NA	NA	NA	NA	NA	NA	NA	0.86184	1.42651
YDR350C	NA	NA	NA	NA	1.69171	NA	NA	2.56791	1.61087
YDR351W	1.61242	2.07653	2.65532	NA	1.80594	2.82388	1.61977	1.95418	3.38195
YDR352W	NA	NA	NA	NA	NA	1.51681	NA	NA	1.2976
YDR353W	NA	NA	1.19706	NA	NA	1.30453	NA	NA	0.719671
YDR354W	NA	NA	NA	NA	NA	1.11691	NA	NA	NA
YDR356W	NA	NA	1.97572	1.19403	NA	1.70905	1.10002	1.58173	2.33788
YDR357C	NA	NA	NA	NA	1.90873	NA	NA	NA	NA
YDR358W	NA	NA	2.51446	NA	NA	2.66684	1.3959	2.39118	2.89892
YDR359C	NA	NA	1.14927	NA	1.20768	1.2451	0.80298	1.74446	1.64649
YDR361C	NA	NA	NA	NA	NA	1.03302	NA	NA	1.16564
YDR362C	NA	NA	1.42134	NA	NA	NA	2.34996	2.01272	1.69747
YDR363W	NA	NA	2.26708	1.98895	NA	2.85019	2.06047	1.87708	2.99057
YDR364C	NA	NA	2.17834	NA	NA	2.14686	1.73625	1.49308	2.91405
YDR365C	0.962997	1.03387	1.96646	1.49628	1.22054	1.59374	1.23594	0.993562	1.92334
YDR365W-A	NA	NA	NA	NA	NA	NA	NA	NA	NA
YDR365W-B	0.496104	0.368712	1.1883	0.872415	0.854774	1.8212	1.08394	0.998719	2.04079
YDR367W	NA	NA	NA	NA	NA	NA	NA	NA	NA
YDR368W	NA	NA	1.37592	NA	NA	1.37025	NA	NA	1.38758
YDR369C	NA	NA	NA	NA	NA	1.86967	NA	2.74571	NA
YDR370C	NA	1.80781	1.89523	1.75041	NA	1.99743	NA	NA	1.78433
YDR371W	NA	NA	NA	NA	NA	NA	2.34581	NA	2.02457
YDR372C	NA	NA	1.05019	NA	1.06421	1.31429	NA	NA	1.27341
YDR373W	NA	NA	NA	NA	NA	NA	NA	NA	NA
YDR375C	NA	NA	1.49066	NA	NA	NA	NA	1.75476	1.91242
YDR376W	NA	NA	NA	NA	1.51427	NA	1.24925	1.36813	NA
YDR377W	NA	NA	NA	NA	NA	2.09674	NA	NA	2.37805
YDR378C	1.37517	1.09958	NA	2.19261	1.26496	1.55184	1.1891	1.48055	NA
YDR379W	2.08643	NA	NA	2.46353	1.98037	NA	2.74347	2.50446	1.60164
YDR380W	NA	NA	NA	2.2801	NA	NA	NA	NA	-2.24921
YDR381W	NA	NA	1.98048	0.980891	NA	1.4864	0.948395	NA	1.66695
YDR382W	NA	0.573875	0.0441365	0.601938	0.681337	0.492815	NA	0.757498	1.45489
YDR383C	NA	NA	NA	NA	1.9061	NA	NA	NA	NA
YDR384C	NA	NA	1.37873	1.3465	NA	2.57887	NA	NA	NA
YDR386W	NA	NA	NA	NA	NA	NA	NA	2.74258	3.6182
YDR387C	NA	NA	NA	NA	NA	NA	1.79435	1.51529	1.23355
YDR388W	NA	NA	0.890376	NA	NA	0.862755	1.06633	0.654487	1.08396
YDR390C	NA	NA	NA	NA	1.25115	NA	1.47277	NA	1.16332
YDR391C	NA	NA	NA	NA	NA	NA	NA	NA	NA
YDR392W	NA	NA	NA	1.5696	1.21932	1.47841	1.81451	1.41044	2.15101
YDR394W	NA	NA	NA	0.731096	NA	1.06227	NA	NA	0.709207
YDR395W	NA	NA	NA	0.674907	NA	0.697395	0.637806	NA	0.747313
YDR397C	NA	NA	NA	NA	NA	NA	NA	NA	NA
YDR398W	NA	1.3737	1.7795	0.79919	0.820424	1.51702	0.802126	0.817679	1.54224
YDR399W	NA	0.729088	2.45998	NA	0.715448	1.98487	NA	NA	1.84389
YDR400W	NA	NA	NA	NA	NA	1.42361	NA	NA	1.64751
YDR404C	1.50621	1.79761	2.52035	NA	1.18356	1.42258	1.29792	NA	1.46807
YDR405W	NA	NA	NA	2.33761	NA	NA	2.68418	1.89091	1.45425
YDR406W	NA	NA	NA	NA	NA	NA	3.72776	2.05451	2.81946
YDR407C	1.01156	NA	0.895134	1.46655	1.06605	1.01721	1.44008	1.36306	1.52471
YDR408C	NA	NA	NA	NA	NA	NA	1.6225	1.62126	1.42788
YDR409W	NA	NA	1.55467	NA	1.6731	2.25495	1.65265	2.13248	2.65444
YDR410C	NA	NA	NA	2.49329	NA	NA	NA	NA	NA
YDR411C	NA	NA	NA	NA	NA	NA	NA	NA	NA
YDR412W	NA	1.4553	2.01	1.30584	1.71751	2.0465	1.24451	1.13179	NA
YDR415C	-1.1949	NA	1.9423	NA	1.69331	NA	NA	2.39427	NA
YDR416W	NA	NA	NA	NA	NA	1.46726	1.43388	1.59438	1.4795
YDR418W	NA	0.358499	0.908333	0.647467	0.640498	0.974062	NA	NA	0.479748
YDR419W	NA	NA	NA	NA	NA	NA	1.79881	2.27377	1.41341
YDR420W	NA	NA	NA	NA	1.66	NA	1.41238	2.26266	1.5523
YDR421W	NA	NA	NA	1.62119	NA	NA	1.48699	1.82467	2.17558
YDR422C	NA	NA	NA	NA	NA	1.07069	0.97979	1.83567	1.81617
YDR423C	NA	NA	1.255	1.67609	1.81062	1.29038	2.34737	1.77577	2.25493
YDR424C	NA	NA	NA	NA	NA	NA	NA	NA	NA
YDR425W	NA	NA	2.0415	NA	2.39793	2.08481	1.92551	2.44952	2.21269
YDR427W	NA	1.33094	1.45146	1.08839	1.64472	1.45586	1.0712	1.33036	1.23183
YDR428C	NA	NA	NA	1.55648	NA	NA	4.40141	NA	1.74145
YDR429C	1.50022	NA	NA	1.54209	1.41416	0.719964	1.54631	NA	NA
YDR430C	NA	-1.94755	NA	NA	NA	NA	1.52875	NA	NA
YDR432W	NA	NA	2.0716	0.494922	NA	1.30794	NA	NA	0.965532
YDR434W	NA	NA	NA	NA	NA	1.06686	NA	NA	1.47466
YDR435C	NA	NA	NA	NA	NA	NA	NA	NA	NA
YDR436W	NA	NA	NA	NA	1.75223	1.64019	2.29539	2.53622	1.98255
YDR437W	NA	NA	NA	NA	1.78859	2.45582	NA	2.38678	2.7647
YDR440W	NA	NA	2.05895	NA	1.63042	1.75544	1.38746	1.42166	2.03267
YDR441C	NA	NA	1.45107	NA	NA	NA	NA	1.87409	1.88692
YDR443C	NA	NA	0.892573	1.3372	NA	1.21329	1.72258	1.10222	1.87993
YDR444W	NA	NA	2.40724	NA	NA	2.3065	NA	1.51767	3.22203
YDR447C	NA	NA	0.634233	NA	NA	0.591671	NA	2.83335	-0.631969
YDR448W	2.58583	2.58345	3.55309	2.31168	2.05311	1.76782	3.2066	2.45133	2.23514
YDR449C	NA	2.11873	NA	NA	1.90169	2.02645	1.66282	2.34986	1.56008
YDR450W	1.86234	NA	NA	2.05129	NA	NA	1.70073	NA	NA
YDR451C	1.42889	3.65489	2.78327	1.32126	3.11767	1.56382	1.58468	3.88236	2.36714
YDR452W	NA	NA	NA	NA	0.713744	1.07071	0.928553	1.10132	1.4444
YDR453C	NA	NA	NA	NA	NA	NA	NA	2.77403	NA
YDR454C	NA	0.705215	1.55904	NA	NA	1.38916	NA	NA	1.37551
YDR456W	NA	NA	NA	NA	NA	1.03047	NA	0.813204	1.45467
YDR457W	NA	NA	NA	1.19903	NA	0.994317	1.22368	NA	1.25635
YDR458C	NA	NA	2.29564	2.25808	1.26686	1.48488	2.471	1.48341	1.89637
YDR459C	NA	NA	NA	NA	NA	2.1501	NA	1.99133	2.06623
YDR460W	NA	NA	1.67486	NA	2.39799	2.41156	NA	NA	1.88104
YDR461W	2.1263	2.84148	1.63088	2.10035	2.82694	1.40687	1.84183	2.67237	1.93856
YDR462W	NA	NA	NA	NA	NA	2.11188	1.68772	NA	NA
YDR463W	NA	NA	1.86435	0.969442	NA	2.09735	1.32358	NA	2.34601
YDR464W	NA	NA	NA	2.08872	NA	NA	2.1814	1.15356	1.71206
YDR465C	NA	NA	NA	NA	NA	NA	NA	NA	0.992549
YDR466W	NA	1.15447	1.80034	NA	NA	1.36831	1.35064	1.58776	2.28088
YDR468C	NA	NA	2.07227	NA	1.76766	2.24985	1.98887	1.85916	3.32494
YDR469W	NA	NA	NA	2.19267	NA	NA	NA	NA	2.67868
YDR470C	NA	NA	NA	NA	NA	NA	NA	NA	1.91092
YDR471W	NA	NA	NA	NA	NA	NA	NA	NA	NA
YDR472W	NA	NA	NA	NA	NA	NA	1.63885	NA	NA
YDR473C	NA	NA	NA	NA	NA	NA	2.01097	3.36548	2.16821
YDR475C	NA	NA	NA	NA	1.408	NA	1.6514	1.72791	1.57129
YDR476C	NA	NA	NA	NA	NA	NA	NA	NA	2.00037
YDR477W	NA	NA	0.870777	NA	NA	1.00861	1.41805	NA	0.808897
YDR478W	NA	NA	NA	NA	NA	NA	NA	NA	NA
YDR479C	NA	NA	2.35578	NA	1.6445	2.5367	2.11258	1.36736	3.32959
YDR480W	NA	NA	NA	NA	NA	NA	1.76228	NA	2.01109
YDR481C	NA	NA	0.862206	NA	NA	1.28679	0.645725	NA	1.29886
YDR482C	NA	NA	NA	NA	2.58213	1.79721	NA	3.19237	NA
YDR483W	NA	NA	NA	0.706268	NA	1.01776	0.704834	NA	1.00879
YDR484W	NA	NA	NA	NA	1.99651	NA	NA	2.13394	NA
YDR485C	NA	NA	1.05974	1.91582	1.16156	1.75701	2.49102	NA	1.74691
YDR486C	NA	NA	NA	NA	NA	2.24422	NA	2.36955	2.42802
YDR487C	1.04995	NA	NA	NA	1.0722	NA	0.74968	0.97168	NA
YDR488C	NA	NA	NA	NA	NA	1.82443	NA	NA	2.05179
YDR489W	NA	NA	NA	NA	NA	NA	2.07629	NA	1.95699
YDR490C	NA	NA	NA	NA	NA	NA	1.44969	1.28902	2.27637
YDR492W	NA	NA	NA	NA	NA	NA	NA	NA	NA
YDR493W	NA	NA	NA	NA	2.78598	2.87366	NA	NA	3.48204
YDR494W	NA	NA	NA	2.00445	NA	2.1195	2.13486	NA	2.00549
YDR495C	NA	NA	NA	NA	NA	NA	NA	NA	NA
YDR496C	NA	1.35109	1.75648	1.24913	1.1706	1.55563	1.02519	1.18839	1.35454
YDR497C	NA	NA	NA	0.591505	0.63262	0.968035	NA	NA	0.638396
YDR498C	NA	NA	2.59419	NA	NA	2.53474	NA	NA	NA
YDR499W	NA	NA	1.82164	NA	NA	NA	2.15324	1.4207	2.07286
YDR500C	NA	NA	NA	1.75532	NA	1.05807	NA	NA	0.620916
YDR501W	NA	NA	NA	NA	NA	NA	NA	2.27936	3.28381
YDR502C	NA	NA	1.5662	NA	0.5227	1.19675	-0.668954	NA	1.25262
YDR503C	NA	NA	NA	1.9633	NA	1.86459	2.44831	NA	NA
YDR504C	2.56606	1.54862	2.43354	2.08797	NA	2.10875	2.54683	NA	NA
YDR505C	1.55871	1.04112	1.5356	1.67413	NA	NA	2.14513	3.3642	1.43419
YDR506C	NA	NA	NA	NA	NA	NA	2.11157	NA	2.23661
YDR507C	NA	2.75792	1.64586	NA	2.18529	1.27654	1.01563	2.12183	1.63902
YDR508C	NA	NA	0.973296	0.761898	NA	1.0877	0.905372	NA	1.68448
YDR510W	NA	1.24723	2.03961	0.742732	1.00346	1.42977	NA	1.14518	1.74154
YDR511W	NA	NA	NA	NA	2.44013	NA	NA	2.48227	2.81537
YDR512C	NA	NA	NA	NA	NA	NA	NA	NA	NA
YDR513W	NA	NA	2.67259	NA	NA	1.8017	NA	NA	NA
YDR514C	NA	NA	NA	NA	NA	1.88544	1.50187	2.33955	1.67605
YDR515W	NA	1.87735	NA	3.34358	NA	1.96713	NA	NA	NA
YDR516C	NA	NA	NA	NA	NA	NA	NA	NA	1.13579
YDR517W	NA	NA	NA	NA	NA	NA	1.01838	1.46412	NA
YDR518W	NA	NA	NA	NA	NA	NA	NA	NA	NA
YDR519W	NA	NA	1.70666	NA	NA	1.51292	NA	NA	1.1084
YDR520C	NA	NA	NA	NA	2.42887	1.23239	1.53979	3.05004	2.38285
YDR524C	1.75836	NA	2.5049	1.83238	1.18631	2.29565	1.95509	1.62421	2.06634
YDR527W	NA	NA	NA	1.3107	1.86815	1.95684	1.92744	2.23795	1.46346
YDR528W	2.42159	2.59964	3.18428	2.07252	2.0502	2.68208	2.59728	2.75309	3.5682
YDR529C	NA	NA	NA	1.59894	1.72223	NA	NA	1.39689	NA
YDR530C	NA	NA	NA	NA	NA	3.04313	1.96779	1.6465	2.97163
YDR531W	1.54721	NA	NA	1.51275	1.21242	1.55262	NA	NA	NA
YDR532C	2.88212	3.43784	2.44352	2.45818	NA	NA	2.20372	2.86042	NA
YDR533C	NA	NA	NA	NA	NA	NA	NA	1.64993	NA
YDR538W	NA	NA	NA	NA	NA	NA	NA	NA	NA
YDR539W	NA	NA	1.93788	NA	NA	1.55589	1.28088	NA	1.94698
YDR540C	NA	NA	NA	NA	NA	NA	NA	NA	NA
YDR541C	NA	NA	NA	NA	NA	NA	NA	1.6622	NA
YDRCdelta2	NA	NA	NA	NA	NA	NA	NA	NA	NA
YDRCdelta21	NA	NA	NA	NA	NA	NA	NA	NA	NA
YDRCdelta22	NA	NA	NA	NA	NA	NA	NA	NA	NA
YDRCdelta3	NA	NA	NA	NA	NA	NA	NA	NA	NA
YDRCdelta4	NA	NA	NA	NA	NA	NA	NA	NA	NA
YDRCdelta5	NA	NA	NA	NA	NA	NA	NA	NA	NA
YDRCdelta6a	NA	NA	NA	NA	NA	NA	NA	NA	NA
YDRCdelta6b	NA	NA	NA	NA	NA	NA	NA	NA	NA
YDRCdelta7	NA	NA	NA	NA	NA	NA	NA	NA	NA
YDRCdelta8	NA	NA	NA	NA	NA	NA	NA	NA	NA
YDRCdelta9	NA	NA	NA	NA	NA	NA	NA	NA	NA
YDRCsigma1	NA	NA	NA	NA	NA	NA	NA	NA	NA
YDRCsigma2	NA	NA	NA	NA	NA	NA	NA	NA	NA
YDRCsigma3	NA	NA	NA	NA	NA	NA	NA	NA	NA
YDRCsigma4	NA	NA	NA	NA	NA	NA	NA	NA	NA
YDRCsigma6	NA	NA	NA	NA	NA	NA	NA	NA	NA
YDRWdelta10	NA	NA	NA	NA	NA	NA	NA	NA	NA
YDRWdelta11	NA	NA	NA	NA	NA	NA	NA	NA	NA
YDRWdelta12	NA	NA	NA	2.95817	NA	NA	NA	NA	NA
YDRWdelta13	NA	NA	NA	NA	NA	NA	NA	NA	NA
YDRWdelta14	NA	NA	NA	NA	NA	NA	NA	NA	NA
YDRWdelta19	NA	NA	NA	NA	NA	NA	NA	NA	NA
YDRWdelta20	NA	NA	NA	NA	NA	NA	NA	NA	NA
YDRWdelta23	NA	NA	NA	NA	NA	NA	NA	NA	NA
YDRWdelta24	NA	NA	NA	NA	NA	NA	NA	NA	NA
YDRWdelta25	NA	NA	NA	NA	NA	NA	NA	NA	NA
YDRWdelta26	NA	NA	NA	NA	NA	NA	NA	NA	NA
YDRWdelta27	NA	NA	NA	NA	NA	NA	NA	NA	NA
YDRWdelta28	NA	NA	NA	NA	NA	1.20548	NA	NA	NA
YDRWdelta29	NA	NA	NA	NA	NA	NA	NA	NA	NA
YDRWdelta30	NA	NA	NA	NA	NA	NA	NA	NA	NA
YDRWdelta31	NA	NA	NA	NA	NA	NA	NA	3.94717	NA
YDRWdelta7	NA	NA	NA	NA	NA	NA	NA	NA	NA
YDRWsigma2	NA	NA	NA	NA	NA	NA	NA	NA	NA
YDRWsigma4	NA	NA	NA	NA	NA	NA	NA	NA	NA
YDRWsigma5	NA	NA	NA	NA	NA	NA	NA	NA	NA
YEL001C	NA	NA	NA	0.968648	NA	1.42414	NA	NA	1.08769
YEL002C	NA	NA	NA	0.603308	NA	1.03417	NA	NA	NA
YEL004W	NA	NA	1.28832	NA	NA	1.49778	2.60946	1.30437	1.52806
YEL005C	NA	NA	NA	NA	NA	NA	NA	NA	2.68058
YEL006W	NA	NA	1.2483	NA	NA	NA	NA	1.66873	NA
YEL007W	NA	1.07129	1.24673	0.904016	1.10944	1.67999	0.979066	1.61129	2.07464
YEL011W	NA	NA	2.02271	NA	NA	2.57786	2.33522	2.70044	3.67679
YEL012W	NA	NA	NA	NA	NA	NA	NA	NA	NA
YEL013W	NA	NA	1.07737	0.900695	NA	0.994796	NA	0.745913	0.98051
YEL015W	NA	NA	NA	1.33318	1.6078	0.891376	1.12424	1.25464	NA
YEL016C	NA	NA	1.74028	NA	NA	1.90989	NA	NA	2.4292
YEL017C-A	0.621815	0.7862	1.13615	0.853581	0.752338	0.890551	0.679469	1.0505	1.10457
YEL017W	NA	NA	1.96813	NA	NA	NA	NA	NA	NA
YEL018W	2.98188	2.13976	4.53165	NA	NA	2.82154	2.22005	NA	3.05083
YEL019C	NA	NA	NA	NA	NA	NA	NA	2.18247	1.38382
YEL021W	NA	NA	NA	NA	NA	NA	NA	NA	NA
YEL022W	NA	NA	1.13937	1.07888	NA	2.30318	1.38219	0.817211	1.6978
YEL024W	NA	1.38218	2.26369	NA	NA	1.85358	NA	NA	2.68728
YEL025C	NA	NA	1.14234	NA	NA	1.25591	0.857717	NA	1.69117
YEL026W	1.24912	1.45343	1.37429	1.01909	0.978316	0.90268	NA	0.492601	NA
YEL027W	NA	NA	1.05342	0.431678	0.58914	NA	NA	NA	1.19486
YEL029C	NA	2.05046	1.9655	NA	NA	NA	NA	NA	NA
YEL031W	NA	NA	NA	NA	NA	0.44516	NA	NA	0.422909
YEL032W	0.941572	1.16093	2.31007	0.956036	NA	1.15326	1.04612	NA	1.29216
YEL034W	0.318522	0.506097	0.96138	0.247697	0.532525	0.750942	-0.23686	-0.260588	NA
YEL036C	NA	NA	NA	0.992084	1.23792	1.51215	0.855385	NA	1.49394
YEL037C	NA	NA	0.759012	NA	NA	1.05727	NA	NA	NA
YEL038W	NA	NA	NA	NA	NA	NA	NA	1.45848	NA
YEL039C	NA	NA	NA	NA	NA	NA	NA	NA	NA
YEL040W	NA	0.73113	2.35134	0.399185	NA	1.47441	NA	NA	1.34926
YEL042W	NA	NA	0.665607	0.703479	0.669811	0.796826	NA	NA	0.895595
YEL043W	NA	NA	NA	1.29364	NA	NA	1.45332	0.995152	NA
YEL044W	NA	NA	NA	NA	NA	NA	NA	NA	NA
YEL046C	NA	NA	1.35909	0.616614	NA	1.15459	0.625252	NA	2.08417
YEL047C	NA	NA	NA	NA	NA	NA	NA	NA	NA
YEL048C	NA	NA	NA	NA	NA	1.92696	NA	2.10252	1.40468
YEL050C	NA	NA	2.53425	NA	NA	2.461	1.68832	NA	2.67862
YEL051W	NA	NA	1.50238	0.766916	NA	1.589	NA	NA	1.70079
YEL052W	NA	NA	1.33628	NA	NA	1.20227	NA	NA	2.062
YEL053C	NA	NA	1.13948	NA	1.49164	0.921331	NA	1.64188	1.92234
YEL054C	0.339686	0.958758	1.7149	0.722768	1.03207	2.07027	NA	NA	0.830388
YEL055C	NA	NA	NA	NA	0.808808	NA	NA	NA	0.882307
YEL056W	NA	NA	-1.97198	1.34255	NA	-0.255118	NA	NA	-0.419383
YEL058W	NA	NA	NA	NA	NA	1.0713	NA	NA	1.22347
YEL059C-A	NA	NA	NA	NA	NA	NA	NA	NA	NA
YEL060C	1.10478	NA	1.41862	0.833022	NA	NA	2.02561	1.35036	1.67365
YEL061C	2.47425	3.59608	4.42195	1.64104	1.76906	2.21547	1.98826	2.72166	3.12201
YEL062W	NA	NA	NA	NA	NA	NA	NA	NA	1.8128
YEL063C	NA	NA	1.21299	1.10334	NA	NA	1.42011	0.873252	1.26181
YEL064C	NA	NA	NA	2.86955	NA	NA	2.591	1.46986	1.6907
YEL065W	NA	NA	NA	1.21547	0.835913	1.01804	2.59107	2.52698	2.70927
YEL066W	NA	NA	NA	NA	NA	1.71638	NA	NA	NA
YEL067C	NA	NA	NA	NA	NA	NA	2.39864	NA	NA
YEL069C	NA	NA	NA	NA	NA	NA	NA	NA	NA
[truncated: 3,946 more rows]
