# Supplementary material for: Genome-Wide Mapping of Decay Factor–mRNA Interactions in Yeast Identifies Nutrient-Responsive Transcripts as Targets of the Deadenylase Ccr4
Source: G3 (Bethesda). 2017 Nov 20;8(1):315–30. doi: 10.1534/g3.117.300415 (PMC5765359; doi:10.1534/g3.117.300415)
Supplement: Supplementary file 4 [file 315FileS4.xlsx]

## Sheet: miller_supplemental_data_Table_
GOID	GO term	Frequency	Genome Frequency	Gene(s)
7005	mitochondrion organization	62 out of 232 genes, 26.7%	390 of 6338 genes, 6.2%	CBP6,MIC12,MRPL37,MRPL27,MRPL32,HCM1,IMG2,PTC1,MRP10,CBS1,QRI7,MSS2,MRPL11,RSM10,PET100,YDR115W,NUM1,MFB1,MZM1,QCR7,RSM18,PET117,RSM23,MRF1,MTO1,TIM21,MRP13,RSM27,PET54,FMC1,TPM2,COX16,TIM54,ATP12,RSM7,CMC1,RSM22,MRP49,MRPL38,PAM18,FMP25,UPS2,MDM30,NAM2,PIF1,COX14,ERG29,MRPS17,MRPL44,COA6,AEP2,SWS2,RRG9,ATP23,MRPL50,IFM1,MDM32,PET123,MRPS16,MDM36,MRPL51,MRP2
6325	chromatin organization	57 out of 232 genes, 24.6%	261 of 6338 genes, 4.1%	SWD1,LDB7,SAS3,CKS1,SWD3,SWC5,SHG1,DPB3,SNF5,AHC2,NHP10,CDC7,NSI1,TAF12,TAF10,NGG1,HST4,HTB1,HDA2,ADA2,SDC1,VPS72,SPT2,IES1,CDC26,RAD6,SGF73,RAD54,DOC1,SWC4,YNG2,SPT10,EAF6,MSN4,SET3,MLP1,RSC58,IES3,VPS71,UBC7,IOC4,SAS2,TAF9,SAP30,HHF2,ARP5,FKH2,PHO23,YAF9,EAF7,SPT20,HST3,HIR2,UAF30,LGE1,SPP1,RLF2
278	mitotic cell cycle	40 out of 232 genes, 17.2%	323 of 6338 genes, 5.1%	CLN3,SHE1,KIP1,CKS1,AMN1,MRC1,MCD1,CDC7,DBF4,PDS1,CHL4,GIC2,CIN8,YPI1,ECO1,CDH1,RAD6,MAD1,KIP3,DOC1,GIC1,SPO12,MND2,CSE4,SFI1,LDB18,RSC58,MIH1,CIK1,JNM1,FKH2,IBD2,CNM67,NIP100,HRR25,VIK1,ACM1,MCM16,CLB5,KAR3
7010	cytoskeleton organization	34 out of 232 genes, 14.7%	243 of 6338 genes, 3.8%	SHE1,KIP1,AME1,LSB5,HCM1,NUM1,GIC2,CIN8,SPC25,CDH1,DUO1,KIP3,DAM1,GIC1,PRK1,TPM2,PFD1,TOR2,SPC34,SFI1,LDB18,AVO2,CIK1,JNM1,SIW14,KAR1,CNM67,PCL1,SPC29,NIP100,HRR25,BBP1,CLB5,KAR3
33043	regulation of organelle organization	34 out of 232 genes, 14.7%	280 of 6338 genes, 4.4%	CBP6,AMN1,CDC7,CBS1,GYP7,NSI1,DBF4,CHL4,GIC2,ADA2,YPI1,ECO1,CDH1,DUO1,MAD1,KIP3,DOC1,DAM1,PET54,PXR1,GIC1,SPO12,MND2,SET3,SPC34,PIF1,COX14,CIK1,SAP30,FKH2,PHO23,IBD2,CLB5,KAR3
70271	protein complex biogenesis	34 out of 232 genes, 14.7%	332 of 6338 genes, 5.2%	KIP1,CBP6,CBS1,PET100,CHL4,MZM1,QCR7,CIN8,SPC25,PET117,CNN1,DUO1,SGF73,KIP3,DAM1,PET54,FMC1,COX16,ATP12,CMC1,SPC34,SFI1,FMP25,COX14,COA6,KAR1,CNM67,ATP23,HIR2,SPC29,BBP1,RLF2,YOP1,CLB5
48285	organelle fission	33 out of 232 genes, 14.2%	285 of 6338 genes, 4.5%	KIP1,AMN1,KAR4,MRC1,MCD1,CDC7,DBF4,PDS1,NUM1,CHL4,GIC2,CIN8,YPI1,ECO1,CDH1,RAD6,MAD1,SOH1,KIP3,DOC1,GIC1,SPO12,MND2,CSE4,SET3,CIK1,IBD2,HRR25,VIK1,MCM16,MDM36,CLB5,KAR3
32543	mitochondrial translation	32 out of 232 genes, 13.8%	141 of 6338 genes, 2.2%	CBP6,MRPL37,MRPL27,MRPL32,IMG2,MRP10,CBS1,MRPL11,RSM10,YDR115W,RSM18,RSM23,MRF1,MRP13,RSM27,PET54,RSM7,RSM22,MRP49,MRPL38,NAM2,COX14,MRPS17,MRPL44,AEP2,SWS2,MRPL50,IFM1,PET123,MRPS16,MRPL51,MRP2
7059	chromosome segregation	29 out of 232 genes, 12.5%	188 of 6338 genes, 3%	MTW1,KIP1,AME1,MRC1,MCD1,PDS1,CHL4,CIN8,SPC25,YPI1,ECO1,CNN1,CDH1,DUO1,MAD1,SOH1,DOC1,DAM1,MND2,NNF1,CSE4,SPC34,CIK1,IBD2,NFI1,HRR25,VIK1,MCM16,KAR3
16570	histone modification	27 out of 232 genes, 11.6%	112 of 6338 genes, 1.8%	SWD1,SAS3,SWD3,SHG1,AHC2,TAF12,TAF10,NGG1,HST4,HDA2,ADA2,SDC1,RAD6,SGF73,SWC4,YNG2,SPT10,EAF6,SET3,SAS2,TAF9,HHF2,EAF7,SPT20,HST3,LGE1,SPP1
51726	regulation of cell cycle	26 out of 232 genes, 11.2%	194 of 6338 genes, 3.1%	CLN3,CKS1,AMN1,MRC1,CDC7,DBF4,CHL4,GIC2,YPI1,ECO1,CDH1,RAD6,MAD1,KIP3,DOC1,GIC1,SPO12,MND2,TOR2,SET3,MIH1,CIK1,IBD2,PCL1,CLB5,KAR3
6366	transcription from RNA polymerase II promoter	26 out of 232 genes, 11.2%	480 of 6338 genes, 7.6%	CLN3,LDB7,SNF5,KAR4,HCM1,TAF12,TAF10,HTB1,HDA2,ADA2,SPT2,RAD6,SGF73,SOH1,SPT10,PFD1,GON7,MSN4,MLP1,RSC58,TAF9,SAP30,FKH2,PHO23,EAF7,HIR2
18193	peptidyl-amino acid modification	25 out of 232 genes, 10.8%	136 of 6338 genes, 2.1%	SWD1,SAS3,SWD3,SHG1,AHC2,SLX5,CDC7,TAF12,TAF10,NGG1,ADA2,SDC1,ECO1,SGF73,SWC4,YNG2,SPT10,EAF6,SAS2,TAF9,HHF2,EAF7,SPT20,NFI1,SPP1
6974	cellular response to DNA damage stimulus	23 out of 232 genes, 9.9%	296 of 6338 genes, 4.7%	DPB3,SNF5,MRC1,NHP10,MCD1,SLX5,CDC7,SHU2,PDS1,HTB1,EAF5,ECO1,RAD6,SOH1,RAD54,SWC4,YNG2,SPT10,EAF6,PIF1,YAF9,EAF7,HRR25
6281	DNA repair	22 out of 232 genes, 9.5%	245 of 6338 genes, 3.9%	DPB3,SNF5,MRC1,NHP10,MCD1,CDC7,SHU2,PDS1,HTB1,EAF5,ECO1,RAD6,SOH1,RAD54,SWC4,YNG2,SPT10,EAF6,PIF1,YAF9,EAF7,HRR25
70647	protein modification by small protein conjugation or removal	19 out of 232 genes, 8.2%	194 of 6338 genes, 3.1%	CDC27,APC11,SLX5,CHL4,PEX10,YPI1,CDC26,CDH1,RAD6,SGF73,MAD1,DOC1,MND2,RPL40B,MDM30,IBD2,NFI1,LGE1,ACM1
51321	meiotic cell cycle	16 out of 232 genes, 6.9%	277 of 6338 genes, 4.4%	KAR4,CDC7,DBF4,PDS1,CHL4,RAD6,SOH1,SPO12,MND2,SET3,CIK1,HHF2,LGE1,HRR25,CLB5,KAR3
51603	proteolysis involved in cellular protein catabolic process	16 out of 232 genes, 6.9%	235 of 6338 genes, 3.7%	CDC27,APC11,MFB1,CHL4,YPI1,CDC26,CDH1,RAD6,MAD1,DOC1,MND2,VPS24,MDM30,UBC7,VPS20,IBD2
43543	protein acylation	16 out of 232 genes, 6.9%	66 of 6338 genes, 1.0%	SAS3,AHC2,TAF12,TAF10,NGG1,ADA2,ECO1,SGF73,SWC4,YNG2,SPT10,EAF6,SAS2,TAF9,EAF7,SPT20
48284	organelle fusion	15 out of 232 genes, 6.5%	88 of 6338 genes, 1.4%	CLN3,KAR4,GYP7,TLG1,USE1,SED5,NYV1,MDM30,CIK1,KAR1,TLG2,UFE1,VAM3,SNC2,KAR3
31399	regulation of protein modification process	14 out of 232 genes, 6.0%	119 of 6338 genes, 1.9%	CLN3,PTC1,DBF4,CHL4,ADA2,YPI1,CDH1,MAD1,DOC1,MIH1,IBD2,PCL1,ACM1,CLB5
32200	telomere organization	14 out of 232 genes, 6.0%	76 of 6338 genes, 1.2%	SWD1,SWD3,PBP2,MRC1,NHP10,SLX5,ECO1,RAD6,RAD54,PXR1,EST3,GON7,IES3,PIF1
6310	DNA recombination	13 out of 232 genes, 5.6%	175 of 6338 genes, 2.8%	SNF5,NHP10,MCD1,CDC7,SHU2,PDS1,RAD6,SOH1,RAD54,MND2,GON7,IES3,PIF1
6260	DNA replication	13 out of 232 genes, 5.6%	152 of 6338 genes, 2.4%	DPB3,MRC1,MCD1,CDC7,DBF4,ECO1,PXR1,IPI1,EST3,PIF1,FKH2,LGE1,CLB5
70925	organelle assembly	13 out of 232 genes, 5.6%	122 of 6338 genes, 1.9%	KIP1,RRP7,CHL4,CIN8,KIP3,IPI1,RPS27A,RPL40B,SFI1,SDO1,RPL6B,REX4,CLB5
6468	protein phosphorylation	12 out of 232 genes, 5.2%	194 of 6338 genes, 3.1%	CLN3,PTC1,CDC7,DBF4,CDH1,DOC1,PRK1,TOR2,MIH1,PCL1,HRR25,CLB5
61025	membrane fusion	11 out of 232 genes, 4.7%	76 of 6338 genes, 1.2%	CLN3,GYP7,TLG1,USE1,SED5,NYV1,MDM30,TLG2,UFE1,VAM3,SNC2
6605	protein targeting	10 out of 232 genes, 4.3%	278 of 6338 genes, 4.4%	PEX10,MAD1,PEX14,TIM21,COG2,TIM54,MLP1,PAM18,VPS71,TLG2
6997	nucleus organization	10 out of 232 genes, 4.3%	65 of 6338 genes, 1.0%	SPO7,KAR4,SNL1,APQ12,MLP1,CIK1,KAR1,SYH1,YOP1,KAR3
16050	vesicle organization	10 out of 232 genes, 4.3%	72 of 6338 genes, 1.1%	TLG1,USE1,VPS24,SED5,NYV1,VPS20,TLG2,UFE1,VAM3,SNC2
48308	organelle inheritance	9 out of 232 genes, 3.9%	58 of 6338 genes, 0.9%	SHE3,VAC17,PTC1,NUM1,TPM2,INP1,MDM32,YOP1,MDM36
6629	lipid metabolic process	8 out of 232 genes, 3.4%	277 of 6338 genes, 4.4%	SPO7,HST4,BRR6,APQ12,UPS2,ERG29,TLG2,HST3
51052	regulation of DNA metabolic process	8 out of 232 genes, 3.4%	102 of 6338 genes, 1.6%	MRC1,ECO1,RAD54,PXR1,IPI1,PIF1,FKH2,CLB5
48193	Golgi vesicle transport	8 out of 232 genes, 3.4%	190 of 6338 genes, 3%	TRS23,USE1,COG2,SED5,TLG2,UFE1,SNC2,HRR25
51169	nuclear transport	7 out of 232 genes, 3.0%	173 of 6338 genes, 2.7%	SGF73,MAD1,BRR6,APQ12,RPL40B,MLP1,MDM30
7033	vacuole organization	7 out of 232 genes, 3.0%	77 of 6338 genes, 1.2%	CLN3,VAC17,GYP7,ENV11,TPM2,NYV1,VAM3
8213	protein alkylation	7 out of 232 genes, 3.0%	49 of 6338 genes, 0.8%	SWD1,SWD3,SHG1,SDC1,HHF2,LGE1,SPP1
42255	ribosome assembly	7 out of 232 genes, 3.0%	57 of 6338 genes, 0.9%	RRP7,IPI1,RPS27A,RPL40B,SDO1,RPL6B,REX4
6897	endocytosis	7 out of 232 genes, 3.0%	96 of 6338 genes, 1.5%	LSB5,TLG1,PRK1,TOR2,SIW14,TLG2,SNC2
42221	response to chemical	6 out of 232 genes, 2.6%	397 of 6338 genes, 6.3%	SNF5,KAR4,HCM1,PTC1,MSN4,SPT20
6873	cellular ion homeostasis	6 out of 232 genes, 2.6%	124 of 6338 genes, 2%	YPI1,YHC3,MEH1,ERG29,COA6,MDM32
6354	DNA-templated transcription, elongation	6 out of 232 genes, 2.6%	92 of 6338 genes, 1.5%	LDB7,SPT2,PFD1,RSC58,FKH2,HIR2
51049	regulation of transport	6 out of 232 genes, 2.6%	91 of 6338 genes, 1.4%	RAD6,MAD1,PRK1,TOR2,MLP1,MDM30
55085	transmembrane transport	5 out of 232 genes, 2.2%	227 of 6338 genes, 3.6%	PEX10,PEX14,TIM21,TIM54,PAM18
746	conjugation	5 out of 232 genes, 2.2%	125 of 6338 genes, 2%	KAR4,PTC1,CIK1,KAR1,KAR3
15931	nucleobase-containing compound transport	5 out of 232 genes, 2.2%	122 of 6338 genes, 1.9%	SGF73,BRR6,APQ12,MLP1,MDM30
6364	rRNA processing	5 out of 232 genes, 2.2%	305 of 6338 genes, 4.8%	RRP7,LRP1,IPI1,RPS27A,REX4
42273	ribosomal large subunit biogenesis	5 out of 232 genes, 2.2%	98 of 6338 genes, 1.5%	IPI1,RPL40B,RPL6B,REX4,HRR25
6417	regulation of translation	5 out of 232 genes, 2.2%	94 of 6338 genes, 1.5%	CBP6,CBS1,PET54,COX14,DOM34
8380	RNA splicing	4 out of 232 genes, 1.7%	142 of 6338 genes, 2.2%	PTC1,PET54,NAM2,DIB1
6352	DNA-templated transcription, initiation	4 out of 232 genes, 1.7%	71 of 6338 genes, 1.1%	TAF12,TAF10,SGF73,TAF9
42594	response to starvation	4 out of 232 genes, 1.7%	100 of 6338 genes, 1.6%	COG2,MSN4,PCL1,VAM3
71554	cell wall organization or biogenesis	4 out of 232 genes, 1.7%	199 of 6338 genes, 3.1%	LDB7,GON7,UBC7,AVO2
6360	transcription from RNA polymerase I promoter	4 out of 232 genes, 1.7%	65 of 6338 genes, 1.0%	NSI1,SAP30,PHO23,UAF30
8033	tRNA processing	4 out of 232 genes, 1.7%	106 of 6338 genes, 1.7%	PTC1,QRI7,MTO1,HRR25
6470	protein dephosphorylation	4 out of 232 genes, 1.7%	43 of 6338 genes, 0.7%	SPO7,PTC1,YPI1,SIW14
23052	signaling	4 out of 232 genes, 1.7%	238 of 6338 genes, 3.8%	PTC1,TOR2,AVO2,SPT20
7031	peroxisome organization	4 out of 232 genes, 1.7%	68 of 6338 genes, 1.1%	PEX10,PEX14,COG2,INP1
5975	carbohydrate metabolic process	3 out of 232 genes, 1.3%	257 of 6338 genes, 4.1%	SNF5,YPI1,KEG1
9451	RNA modification	3 out of 232 genes, 1.3%	170 of 6338 genes, 2.7%	QRI7,MTO1,HRR25
42274	ribosomal small subunit biogenesis	3 out of 232 genes, 1.3%	135 of 6338 genes, 2.1%	RRP7,RPS27A,HRR25
6520	cellular amino acid metabolic process	3 out of 232 genes, 1.3%	211 of 6338 genes, 3.3%	GTF1,NAM2,HER2
6401	RNA catabolic process	3 out of 232 genes, 1.3%	122 of 6338 genes, 1.9%	LRP1,MLP1,DOM34
2181	cytoplasmic translation	3 out of 232 genes, 1.3%	171 of 6338 genes, 2.7%	RPS27A,RPL40B,RPL6B
55086	nucleobase-containing small molecule metabolic process	3 out of 232 genes, 1.3%	219 of 6338 genes, 3.5%	QRI7,QCR7,MTO1
1403	invasive growth in response to glucose limitation	3 out of 232 genes, 1.3%	60 of 6338 genes, 0.9%	SNF5,SAP30,PHO23
9408	response to heat	3 out of 232 genes, 1.3%	68 of 6338 genes, 1.1%	MSN4,SAP30,PHO23
8150	biological process unknown	3 out of 232 genes, 1.3%	1089 of 6338 genes, 17.2%	NKP1,YPL216W,ASA1
6397	mRNA processing	2 out of 232 genes, 0.9%	194 of 6338 genes, 3.1%	SPT20,DIB1
6413	translational initiation	2 out of 232 genes, 0.9%	61 of 6338 genes, 1%	AEP2,IFM1
6353	DNA-templated transcription, termination	2 out of 232 genes, 0.9%	43 of 6338 genes, 0.7%	NSI1,RAD6
16197	endosomal transport	2 out of 232 genes, 0.9%	88 of 6338 genes, 1.4%	VPS24,VPS20
10324	membrane invagination	2 out of 232 genes, 0.9%	43 of 6338 genes, 0.7%	MEH1,VAM3
6979	response to oxidative stress	2 out of 232 genes, 0.9%	99 of 6338 genes, 1.6%	HCM1,MSN4
6887	exocytosis	2 out of 232 genes, 0.9%	48 of 6338 genes, 0.8%	TPM2,SNC2
43144	snoRNA processing	2 out of 232 genes, 0.9%	43 of 6338 genes, 0.7%	PXR1,LRP1
6970	response to osmotic stress	2 out of 232 genes, 0.9%	89 of 6338 genes, 1.4%	PTC1,MSN4
6457	protein folding	2 out of 232 genes, 0.9%	94 of 6338 genes, 1.5%	SNL1,PFD1
6091	generation of precursor metabolites and energy	2 out of 232 genes, 0.9%	156 of 6338 genes, 2.5%	QCR7,YPI1
32787	monocarboxylic acid metabolic process	2 out of 232 genes, 0.9%	125 of 6338 genes, 2%	HST4,HST3
51604	protein maturation	2 out of 232 genes, 0.9%	48 of 6338 genes, 0.8%	ENV11,ATP23
7114	cell budding	1 out of 232 genes, 0.4%	60 of 6338 genes, 0.9%	TPM2
54	ribosomal subunit export from nucleus	1 out of 232 genes, 0.4%	46 of 6338 genes, 0.7%	RPL40B
45333	cellular respiration	1 out of 232 genes, 0.4%	86 of 6338 genes, 1.4%	QCR7
43934	sporulation	1 out of 232 genes, 0.4%	132 of 6338 genes, 2.1%	HHF2
9311	oligosaccharide metabolic process	1 out of 232 genes, 0.4%	35 of 6338 genes, 0.6%	SNF5
6811	ion transport	1 out of 232 genes, 0.4%	235 of 6338 genes, 3.7%	YHC3
7124	pseudohyphal growth	1 out of 232 genes, 0.4%	75 of 6338 genes, 1.2%	FKH2
6865	amino acid transport	1 out of 232 genes, 0.4%	40 of 6338 genes, 0.6%	YHC3
6418	tRNA aminoacylation for protein translation	1 out of 232 genes, 0.4%	36 of 6338 genes, 0.6%	NAM2
8643	carbohydrate transport	0 out of 232 genes, 0%	33 of 6338 genes, 0.5%	none
910	cytokinesis	0 out of 232 genes, 0%	80 of 6338 genes, 1.3%	none
6486	protein glycosylation	0 out of 232 genes, 0%	63 of 6338 genes, 1%	none
6869	lipid transport	0 out of 232 genes, 0%	57 of 6338 genes, 0.9%	none
902	cell morphogenesis	0 out of 232 genes, 0%	29 of 6338 genes, 0.5%	none
6383	transcription from RNA polymerase III promoter	0 out of 232 genes, 0%	40 of 6338 genes, 0.6%	none
32196	transposition	0 out of 232 genes, 0%	109 of 6338 genes, 1.7%	none
6414	translational elongation	0 out of 232 genes, 0%	328 of 6338 genes, 5.2%	none
6766	vitamin metabolic process	0 out of 232 genes, 0%	44 of 6338 genes, 0.7%	none
51186	cofactor metabolic process	0 out of 232 genes, 0%	159 of 6338 genes, 2.5%	none
6497	protein lipidation	0 out of 232 genes, 0%	45 of 6338 genes, 0.7%	none
other	other	6 out of 232 genes, 2.6%		CNL1,BLI1,NDL1,SEI1,SAS5,PAC1
